# Supplementary material for: Differential contributions of the two cerebral hemispheres to temporal and spectral speech feedback control
Source: Springer Nature journal article supplement (doi:10.1038/s41467-020-16743-2), 2020-06-05
Supplement: MOESM3 [file 41467_2020_16743_MOESM3_ESM.pdf]

## Reporting Summary

Nature Research wishes to improve the reproducibility of the work that we publish. This form provides structure for consistency and transparency in reporting. For further information on Nature Research policies, see [Authors & Referees](#) and the [Editorial Policy Checklist](#).

### Statistics

For all statistical analyses, confirm that the following items are present in the figure legend, table legend, main text, or Methods section.

n/a Confirmed

- The exact sample size ( $n$ ) for each experimental group/condition, given as a discrete number and unit of measurement
- A statement on whether measurements were taken from distinct samples or whether the same sample was measured repeatedly
- The statistical test(s) used AND whether they are one- or two-sided  
*Only common tests should be described solely by name; describe more complex techniques in the Methods section.*
- A description of all covariates tested
- A description of any assumptions or corrections, such as tests of normality and adjustment for multiple comparisons
- A full description of the statistical parameters including central tendency (e.g. means) or other basic estimates (e.g. regression coefficient) AND variation (e.g. standard deviation) or associated estimates of uncertainty (e.g. confidence intervals)
- For null hypothesis testing, the test statistic (e.g.  $F$ ,  $t$ ,  $r$ ) with confidence intervals, effect sizes, degrees of freedom and  $P$  value noted  
*Give  $P$  values as exact values whenever suitable.*
- For Bayesian analysis, information on the choice of priors and Markov chain Monte Carlo settings
- For hierarchical and complex designs, identification of the appropriate level for tests and full reporting of outcomes
- Estimates of effect sizes (e.g. Cohen's  $d$ , Pearson's  $r$ ), indicating how they were calculated

*Our web collection on [statistics for biologists](#) contains articles on many of the points above.*

### Software and code

Policy information about [availability of computer code](#)

Data collection

Matlab 2012 and Audapter: Stimulus presentation and sound recording

Data analysis

PRAAT: Manual labeling of recorded speech files. Extraction of speech features  
 R 3.5.3: Statistical analysis of behavioral data and visualization  
 Matlab 2012: Environment for fMRI analysis  
 SPM 12: Analysis of fMRI task activation  
 Conn toolbox 17f: functional connectivity resting state analysis  
 LI toolbox: Calculation weighted lateralization indices of functional imaging contrasts  
 Art Repair v4: artifact detection, motion correction of functional data  
 MRICron 2016: visualization of fMRI data

For manuscripts utilizing custom algorithms or software that are central to the research but not yet described in published literature, software must be made available to editors/reviewers. We strongly encourage code deposition in a community repository (e.g. GitHub). See the Nature Research [guidelines for submitting code & software](#) for further information.

### Data

Policy information about [availability of data](#)

All manuscripts must include a [data availability statement](#). This statement should provide the following information, where applicable:

- Accession codes, unique identifiers, or web links for publicly available datasets
- A list of figures that have associated raw data
- A description of any restrictions on data availability

Unthresholded statistical parametric maps are available at <https://identifiers.org/neurovault.collection:7569>. The source data underlying Figure 1, 2, 3a, 3c and supplementary Figure 1 are provided as a source data file.

## Field-specific reporting

Please select the one below that is the best fit for your research. If you are not sure, read the appropriate sections before making your selection.

Life sciences       Behavioural & social sciences       Ecological, evolutionary & environmental sciences

For a reference copy of the document with all sections, see [nature.com/documents/nr-reporting-summary-flat.pdf](https://www.nature.com/documents/nr-reporting-summary-flat.pdf)

## Life sciences study design

All studies must disclose on these points even when the disclosure is negative.

|                 |                                                                                                                                                                                                                                                                                                                                                                 |
|-----------------|-----------------------------------------------------------------------------------------------------------------------------------------------------------------------------------------------------------------------------------------------------------------------------------------------------------------------------------------------------------------|
| Sample size     | Sample sizes were based on previous published studies that reported significant effects for speaking with altered auditory feedback compared to normal speaking with sample sizes below 20 (e.g. Tourville et al. 2008 in = 11 in a restricted search space and Niziolek & Guenther 2013 n = 18 whole brain analysis). We therefore used n = 20 for our groups. |
| Data exclusions | Data was excluded if the real-time tracking algorithm did not consistently work throughout the experiment (Franken et al. 2019. Exp Psychology, Vol. 72, van den Bunt 2018 Scientific studies of reading, Vol. 22) or participants did not follow task instructions (e.g. singing instead of speaking).                                                         |
| Replication     | Data regarding lateralization was analyzed from a behavioral study and an fMRI study and yielded consistent effects. Further, fMRI data was analyzed in different ways to assess lateralization (weighted LIs, direct statistical comparison) and yielded complementary results.                                                                                |
| Randomization   | Participants were randomly allocated to experimental groups                                                                                                                                                                                                                                                                                                     |
| Blinding        | The investigators were not blinded with respect to group allocation. However, the relevant measures which may be influenced by knowledge about task conditions (i.e. changes in produced phonem length) were labelled by a blinded annotator                                                                                                                    |

## Reporting for specific materials, systems and methods

We require information from authors about some types of materials, experimental systems and methods used in many studies. Here, indicate whether each material, system or method listed is relevant to your study. If you are not sure if a list item applies to your research, read the appropriate section before selecting a response.

### Materials & experimental systems

|                                     |                                                                 |
|-------------------------------------|-----------------------------------------------------------------|
| n/a                                 | Involved in the study                                           |
| <input checked="" type="checkbox"/> | <input type="checkbox"/> Antibodies                             |
| <input checked="" type="checkbox"/> | <input type="checkbox"/> Eukaryotic cell lines                  |
| <input checked="" type="checkbox"/> | <input type="checkbox"/> Palaeontology                          |
| <input checked="" type="checkbox"/> | <input type="checkbox"/> Animals and other organisms            |
| <input type="checkbox"/>            | <input checked="" type="checkbox"/> Human research participants |
| <input checked="" type="checkbox"/> | <input type="checkbox"/> Clinical data                          |

### Methods

|                                     |                                                            |
|-------------------------------------|------------------------------------------------------------|
| n/a                                 | Involved in the study                                      |
| <input checked="" type="checkbox"/> | <input type="checkbox"/> ChIP-seq                          |
| <input checked="" type="checkbox"/> | <input type="checkbox"/> Flow cytometry                    |
| <input type="checkbox"/>            | <input checked="" type="checkbox"/> MRI-based neuroimaging |

## Human research participants

Policy information about [studies involving human research participants](#)

|                            |                                                                                                                                                                                                                                                                                                                |
|----------------------------|----------------------------------------------------------------------------------------------------------------------------------------------------------------------------------------------------------------------------------------------------------------------------------------------------------------|
| Population characteristics | 40 healthy volunteers (20 female) participated in the behavioral experiment and 44 healthy volunteers (27 female) in the fMRI study. Participants were adult native right-handed speakers of German [handedness score behavioral study 93 (9.8), fMRI study 90 (11.5)] and reported normal speech and hearing. |
| Recruitment                | Flyer at university. Advertisement in student facebook groups. This recruitment method biased participants to students at Goethe univeristy Frankfurt. The rather young age of our sample (18-35) may restrict generalization of findings to older participants                                                |
| Ethics oversight           | The study was approved by the ethics committee of the Medical Faculty of Goethe-University Frankfurt (DFGKE 1514/2-1) and was in accordance with the Declaration of Helsinki.                                                                                                                                  |

Note that full information on the approval of the study protocol must also be provided in the manuscript.

# Magnetic resonance imaging

## Experimental design

|                                 |                                                                                                                                                                                                                                                                                                                                                                                                                                                                                                                               |
|---------------------------------|-------------------------------------------------------------------------------------------------------------------------------------------------------------------------------------------------------------------------------------------------------------------------------------------------------------------------------------------------------------------------------------------------------------------------------------------------------------------------------------------------------------------------------|
| Design type                     | Event-related, sparse sampling design; Continuous resting state.                                                                                                                                                                                                                                                                                                                                                                                                                                                              |
| Design specifications           | <p>Task fMRI: 2 Conditions a 30 trials + control condition with 30 occurrences</p> <p>Each trial started with the 2 seconds long acquisition of one functional image. Image acquisition was followed by a pause of 0.5-1.5s after which the CVC pseudoword or the non-speech stimulus was visually presented for 2 seconds. After another pause of 2.5-3.5 seconds, the next image was acquired resulting in a total trial length of 8 seconds. Resting_state: Two 7min runs. One before and one after speech adaptation.</p> |
| Behavioral performance measures | <p>Audio recording of participants utterance.</p> <p>Extraction of F1, COG vowel and fricative lengths. LMMs to asses whether participants changed their production.</p>                                                                                                                                                                                                                                                                                                                                                      |

## Acquisition

|                               |                                                                                                                                                                                                                                                                                                                                                                                                                                                                                                                                                 |
|-------------------------------|-------------------------------------------------------------------------------------------------------------------------------------------------------------------------------------------------------------------------------------------------------------------------------------------------------------------------------------------------------------------------------------------------------------------------------------------------------------------------------------------------------------------------------------------------|
| Imaging type(s)               | functional, structural                                                                                                                                                                                                                                                                                                                                                                                                                                                                                                                          |
| Field strength                | 3                                                                                                                                                                                                                                                                                                                                                                                                                                                                                                                                               |
| Sequence & imaging parameters | <p>High-resolution T1-weighted anatomical scans [TR = 1.9s; TE = 3.04ms; flip angle = 9°; 192 slices per slab; 1mm<sup>3</sup> isotropic voxel size]</p> <p>Functional images were obtained with a gradient-echo T2*-weighted transverse echoplanar image (EPI) sequence [Task-fMRI (122 volumes; TR = 2s; TE = 30ms; silent gap = 6s; flip angle = 90°; 32 axial slices; 3mm<sup>3</sup> isotropic voxel size), Resting-State (178 volumes; TR = 2s; TE = 30ms; flip angle = 90°; 30 axial slices; 3mm<sup>3</sup> isotropic voxel size)].</p> |
| Area of acquisition           | whole brain                                                                                                                                                                                                                                                                                                                                                                                                                                                                                                                                     |
| Diffusion MRI                 | <input type="checkbox"/> Used <input checked="" type="checkbox"/> Not used                                                                                                                                                                                                                                                                                                                                                                                                                                                                      |

## Preprocessing

|                            |                                                                                                                                                                                                                                                                                                                                                                                                                                                                                                                                                                                                                                                                                                                                                    |
|----------------------------|----------------------------------------------------------------------------------------------------------------------------------------------------------------------------------------------------------------------------------------------------------------------------------------------------------------------------------------------------------------------------------------------------------------------------------------------------------------------------------------------------------------------------------------------------------------------------------------------------------------------------------------------------------------------------------------------------------------------------------------------------|
| Preprocessing software     | <p>standard SPM 12 spatial preprocessing pipeline + ArtRepair motion correction (Realignment of functional images using rigid body transformation, co-registration, smoothing of images with an isotropic 4mm full-width at half-maximum Gaussian kernel to prepare images for additional motion adjustment with Art Repair, motion adjustment of functional images with ArtRepair to reduce interpolation errors from the realignment step, normalization of functional images to a symmetric brain template via parameters from segmentation of structural scans, final smoothing of images with an isotropic 7 mm full-width at half-maximum Gaussian kernel.</p> <p>Additional denoising steps for resting state data are described below.</p> |
| Normalization              | Normalization via segmentation                                                                                                                                                                                                                                                                                                                                                                                                                                                                                                                                                                                                                                                                                                                     |
| Normalization template     | Data was normalized with a symmetric version of the standard Montreal Neurological Institute (MNI) brain template within the Talairach and Tournoux reference frame. The symmetric version was created by averaging the original version with its R/L flipped version.                                                                                                                                                                                                                                                                                                                                                                                                                                                                             |
| Noise and artifact removal | <p>Motion correction using rigid body transformation.</p> <p>Resting state data was further denoised to reduce the impact of physiological noise and motion on results. Physiological noise was removed with the anatomical component-based noise correction method (aCompCor) and 16 orthogonal time-courses in subject-specific WM and CSF ROIs. Further, subject-specific motion parameters and their first derivative (scan-to-scan motion), task-effects and subject-specific time points identified as outliers (scan-to-scan global signal change &gt; 9 and movement more than 2 mm) were regressed out. To isolate low frequency fluctuations, resting-state data were bandpass filtered (0.008-0.09 Hz)</p>                              |
| Volume censoring           | scan-to-scan global signal change > 9 and movement more than 2 mm                                                                                                                                                                                                                                                                                                                                                                                                                                                                                                                                                                                                                                                                                  |

## Statistical modeling & inference

|                         |                                                                                                                                                                                                                                                                                                                                                                                                                                                                                                                                                                                                                                                   |
|-------------------------|---------------------------------------------------------------------------------------------------------------------------------------------------------------------------------------------------------------------------------------------------------------------------------------------------------------------------------------------------------------------------------------------------------------------------------------------------------------------------------------------------------------------------------------------------------------------------------------------------------------------------------------------------|
| Model type and settings | <p>Mass univariate approach</p> <p>Task</p> <p>The GLM contained 3 regressors of interest, modelling the three auditory feedback conditions (no perturbation, vowel perturbation, consonant perturbation). Due to the additional motion adjustment step during preprocessing movement-related effects were not modelled additionally. Condition-specific regressors were obtained by convoluting the onset and duration of conditions (modelled by boxcar functions) with the canonical hemodynamic response function. To account for the use of a sparse sampling protocol, we adjusted microtime resolution and onset (SPM.T = 64, SPM.TO =</p> |
|-------------------------|---------------------------------------------------------------------------------------------------------------------------------------------------------------------------------------------------------------------------------------------------------------------------------------------------------------------------------------------------------------------------------------------------------------------------------------------------------------------------------------------------------------------------------------------------------------------------------------------------------------------------------------------------|

8s). The model was high pass filtered with a cut off at 128s to remove low frequency drifts. An autoregressive model AR (1) was used to account for serial autocorrelations in the time series.

After model estimation, two contrasts were specified testing the effect of speaking with altered auditory feedback (vowel or consonant perturbation) against normal speaking without perturbation in each individual (first-level). The resulting contrast images were subjected to second level random effect analysis to infer brain activation at the population level.

#### Resting State

For each participant and each resting-state run (pre- and post adaptation) seed-to-voxel connectivity maps were generated by calculating bivariate correlations between the average seed time-series and the whole brain (seeds: 6mm spheres centered on local peak activation in spectral/temporal feedback control contrasts). The second level GLM contained two regressors representing changes in connectivity between resting state runs (one for the spectral group and another for the temporal group) and 4 parametric regressors that represented the subject-specific amount of compensation for spectral or temporal perturbations of the vowel and consonant, separately.

#### Effect(s) tested

##### Task fMRI:

Differences in activity and lateralization between speaking with spectrally/temporally altered speech feedback and normal speaking (conjunction analysis over vowel and consonant regressors)

Correlations between the individual degree of compensation and brain activity in feedback-control related brain areas.

Resting State: motor learning-related connectivity changes by means of conjunction analyses over vowel and consonant regressors (e.g. post/pre adaptation difference that correlates with F1 compensation  $\cap$  post/pre adaptation difference that correlates with COG compensation).

Specify type of analysis:  Whole brain  ROI-based  Both

Anatomical location(s)

Statistic type for inference  
(See [Eklund et al. 2016](#))

Correction

#### Models & analysis

n/a | Involved in the study

Functional and/or effective connectivity

Graph analysis

Multivariate modeling or predictive analysis

Functional and/or effective connectivity
