# Supplementary material for: Differential contributions of the two cerebral hemispheres to temporal and spectral speech feedback control
Source: Nat Commun. 2020 Jun 5;11:2839. doi: 10.1038/s41467-020-16743-2 (PMC7275068; doi:10.1038/s41467-020-16743-2)
Supplement: Supplementary file 4 — Source Data [file 41467_2020_16743_MOESM4_ESM.xlsx]

## Sheet: Figure 1
Figure 1 a-c
VP	trial	Block	Cond	phonem	type	values				Cond	Block	type	marginal estimated mean	model derived s.e.m
bms31_vowel.txt	1	B1	0KG	v	spectral	0.988027496648451				0KG	B1	spectral	1000	0
bms31_vowel.txt	2	B1	0KG	v	spectral	1.0009122474272				0KG	B2	spectral	1002	0.009
bms31_vowel.txt	3	B1	0KG	v	spectral	0.991673015537639				0KG	B3	spectral	0.992	0.009
bms31_vowel.txt	4	B1	0KG	v	spectral	1.04540833301518				0KG	B4	spectral	0.979	0.01
bms31_vowel.txt	5	B1	0KG	v	spectral	0.986283812035286				0KG	B5	spectral	0.994	0.013
bms31_vowel.txt	6	B1	0KG	v	spectral	0.974717069521922				B	B1	spectral	1000	0
bms31_vowel.txt	7	B1	0KG	v	spectral	0.985119222615109				B	B2	spectral	0.984	0.0117
bms31_vowel.txt	8	B1	0KG	v	spectral	1.01365008572184				B	B3	spectral	0.973	0.012
bms31_vowel.txt	9	B1	0KG	v	spectral	0.984807577210693				B	B4	spectral	0.961	0.0123
bms31_vowel.txt	10	B1	0KG	v	spectral	1.00577788879065				B	B5	spectral	0.976	0.0147
bms31_vowel.txt	11	B1	0KG	v	spectral	0.999748932276874				R	B1	spectral	1	0
bms31_vowel.txt	12	B1	0KG	v	spectral	0.973419266633833				R	B2	spectral	0.98	0.0114
bms31_vowel.txt	13	B1	0KG	v	spectral	1.01534495094505				R	B3	spectral	0.964	0.0126
bms31_vowel.txt	14	B1	0KG	v	spectral	0.960519213939554				R	B4	spectral	0.951	0.9143
bms31_vowel.txt	15	B1	0KG	v	spectral	NA				R	B5	spectral	0.963	0.0163
bms31_vowel.txt	16	B1	0KG	v	spectral	0.985823772007369				L	B1	spectral	1	0
bms31_vowel.txt	17	B1	0KG	v	spectral	1.00087703031164				L	B2	spectral	0.993	0.0118
bms31_vowel.txt	18	B1	0KG	v	spectral	1.02452053481465				L	B3	spectral	0.978	0.0123
bms31_vowel.txt	19	B1	0KG	v	spectral	1.03080518285962				L	B4	spectral	0.965	0.0126
bms31_vowel.txt	20	B1	0KG	v	spectral	1.03256436768744				L	B5	spectral	0.977	0.014
bms31_vowel.txt	21	B2	0KG	v	spectral	1.01959251228315				0KG	B1	temporal	1	0
bms31_vowel.txt	22	B2	0KG	v	spectral	1.00494344019184				0KG	B2	temporal	0.999	0.009
bms31_vowel.txt	23	B2	0KG	v	spectral	0.968731877660563				0KG	B3	temporal	0.988	0.0097
bms31_vowel.txt	24	B2	0KG	v	spectral	1.03267665761763				0KG	B4	temporal	0.975	0.01
bms31_vowel.txt	25	B2	0KG	v	spectral	0.988501876345319				0KG	B5	temporal	0.990	0.013
bms31_vowel.txt	26	B2	0KG	v	spectral	0.95205418424125				B	B1	temporal	1	0
bms31_vowel.txt	27	B2	0KG	v	spectral	1.01288462210902				B	B2	temporal	0.982	0.0118
bms31_vowel.txt	28	B2	0KG	v	spectral	1.02797524353799				B	B3	temporal	0.971	0.0125
bms31_vowel.txt	29	B2	0KG	v	spectral	1.02690977493566				B	B4	temporal	0.958	0.0128
bms31_vowel.txt	30	B2	0KG	v	spectral	0.993671209303365				B	B5	temporal	0.973	0.0148
bms31_vowel.txt	31	B2	0KG	v	spectral	0.959693094562008				R	B1	temporal	1	0
bms31_vowel.txt	32	B2	0KG	v	spectral	1.00888075381166				R	B2	temporal	1	0.0118
bms31_vowel.txt	33	B2	0KG	v	spectral	0.983456971955956				R	B3	temporal	0.984	0.0129
bms31_vowel.txt	34	B2	0KG	v	spectral	1.0044428133729				R	B4	temporal	0.971	0.0146
bms31_vowel.txt	35	B2	0KG	v	spectral	0.968765698890095				R	B5	temporal	0.98	0.0166
bms31_vowel.txt	36	B2	0KG	v	spectral	0.970406253877356				L	B1	temporal	1	0
bms31_vowel.txt	37	B2	0KG	v	spectral	0.983341478131851				L	B2	temporal	0.985	0.0122
bms31_vowel.txt	38	B2	0KG	v	spectral	1.0443810956229				L	B3	temporal	0.97	0.0126
bms31_vowel.txt	39	B2	0KG	v	spectral	1.01269491870491				L	B4	temporal	0.957	0.013
bms31_vowel.txt	40	B2	0KG	v	spectral	1.01834629321362				L	B5	temporal	0.969	0.0143
bms31_vowel.txt	41	B3	0KG	v	spectral	1.01082696584962
bms31_vowel.txt	42	B3	0KG	v	spectral	NA
bms31_vowel.txt	43	B3	0KG	v	spectral	0.944908906794176
bms31_vowel.txt	44	B3	0KG	v	spectral	1.02311307310723
bms31_vowel.txt	45	B3	0KG	v	spectral	0.999237483312228
bms31_vowel.txt	46	B3	0KG	v	spectral	1.01056006610441
bms31_vowel.txt	47	B3	0KG	v	spectral	1.01880003307656
bms31_vowel.txt	48	B3	0KG	v	spectral	0.92337710165047
bms31_vowel.txt	49	B3	0KG	v	spectral	0.969797677480267
bms31_vowel.txt	50	B3	0KG	v	spectral	1.04736044328241
bms31_vowel.txt	51	B3	0KG	v	spectral	0.969797862885469
bms31_vowel.txt	52	B3	0KG	v	spectral	0.928367039917577
bms31_vowel.txt	53	B3	0KG	v	spectral	0.982394096921231
bms31_vowel.txt	54	B3	0KG	v	spectral	0.939022704032797
bms31_vowel.txt	55	B3	0KG	v	spectral	0.892343760517864
bms31_vowel.txt	56	B3	0KG	v	spectral	0.944954461525018
bms31_vowel.txt	57	B3	0KG	v	spectral	0.95387276897465
bms31_vowel.txt	58	B3	0KG	v	spectral	0.969342956145196
bms31_vowel.txt	59	B3	0KG	v	spectral	0.978942526826363
bms31_vowel.txt	60	B3	0KG	v	spectral	0.952875434856619
bms31_vowel.txt	61	B4	0KG	v	spectral	0.967776242449682
bms31_vowel.txt	62	B4	0KG	v	spectral	1.02199881697682
bms31_vowel.txt	63	B4	0KG	v	spectral	1.02066168675395
bms31_vowel.txt	64	B4	0KG	v	spectral	1.0193931681478
bms31_vowel.txt	65	B4	0KG	v	spectral	0.944600634132263
bms31_vowel.txt	66	B4	0KG	v	spectral	0.991450066019099
bms31_vowel.txt	67	B4	0KG	v	spectral	0.996900049655047
bms31_vowel.txt	68	B4	0KG	v	spectral	0.99736312535011
bms31_vowel.txt	69	B4	0KG	v	spectral	1.00200489852311
bms31_vowel.txt	70	B4	0KG	v	spectral	0.929145844449054
bms31_vowel.txt	71	B4	0KG	v	spectral	0.972773609482837
bms31_vowel.txt	72	B4	0KG	v	spectral	0.985587850280313
bms31_vowel.txt	73	B4	0KG	v	spectral	0.93153186756939
bms31_vowel.txt	74	B4	0KG	v	spectral	0.923118668748782
bms31_vowel.txt	75	B4	0KG	v	spectral	0.960408873572426
bms31_vowel.txt	76	B4	0KG	v	spectral	0.900623432103902
bms31_vowel.txt	77	B4	0KG	v	spectral	0.980542120524064
bms31_vowel.txt	78	B4	0KG	v	spectral	1.04652864062321
bms31_vowel.txt	79	B4	0KG	v	spectral	0.977080445010927
bms31_vowel.txt	80	B4	0KG	v	spectral	1.04610350342885
bms31_vowel.txt	81	B5	0KG	v	spectral	1.05329576214628
bms31_vowel.txt	82	B5	0KG	v	spectral	1.04710951177138
bms31_vowel.txt	83	B5	0KG	v	spectral	1.05185831845474
bms31_vowel.txt	84	B5	0KG	v	spectral	NA
bms31_vowel.txt	85	B5	0KG	v	spectral	1.03323407357225
bms31_vowel.txt	86	B5	0KG	v	spectral	1.04756896430025
bms31_vowel.txt	87	B5	0KG	v	spectral	0.999448021675635
bms31_vowel.txt	88	B5	0KG	v	spectral	1.01436008947854
bms31_vowel.txt	89	B5	0KG	v	spectral	0.980864321624008
bms31_vowel.txt	90	B5	0KG	v	spectral	1.03730873478448
bms31_vowel.txt	91	B5	0KG	v	spectral	1.05633515467582
bms31_vowel.txt	92	B5	0KG	v	spectral	0.976510859500879
bms31_vowel.txt	93	B5	0KG	v	spectral	1.05328630630581
bms31_vowel.txt	94	B5	0KG	v	spectral	0.998919150880202
bms31_vowel.txt	95	B5	0KG	v	spectral	1.01353845538526
bms31_vowel.txt	96	B5	0KG	v	spectral	0.947798130309469
bms31_vowel.txt	97	B5	0KG	v	spectral	1.00061885103881
bms31_vowel.txt	98	B5	0KG	v	spectral	1.04016750839789
bms31_vowel.txt	99	B5	0KG	v	spectral	1.02007093794116
bms31_vowel.txt	100	B5	0KG	v	spectral	0.969540586603168
bms31_vowel.txt	1	B1	B	v	spectral	NA
bms31_vowel.txt	2	B1	B	v	spectral	1.03812370642913
bms31_vowel.txt	3	B1	B	v	spectral	0.966716937245058
bms31_vowel.txt	4	B1	B	v	spectral	1.05365931685188
bms31_vowel.txt	5	B1	B	v	spectral	1.0198668007339
bms31_vowel.txt	6	B1	B	v	spectral	1.022505290136
bms31_vowel.txt	7	B1	B	v	spectral	0.984783570340088
bms31_vowel.txt	8	B1	B	v	spectral	0.950806320039399
bms31_vowel.txt	9	B1	B	v	spectral	0.948930187261175
bms31_vowel.txt	10	B1	B	v	spectral	0.970039570538956
bms31_vowel.txt	11	B1	B	v	spectral	NA
bms31_vowel.txt	12	B1	B	v	spectral	NA
bms31_vowel.txt	13	B1	B	v	spectral	1.01775581687045
bms31_vowel.txt	14	B1	B	v	spectral	1.01351545713048
bms31_vowel.txt	15	B1	B	v	spectral	0.956051976966565
bms31_vowel.txt	16	B1	B	v	spectral	0.993146887407869
bms31_vowel.txt	17	B1	B	v	spectral	1.02082637619816
bms31_vowel.txt	18	B1	B	v	spectral	1.02909209717721
bms31_vowel.txt	19	B1	B	v	spectral	0.99339699393409
bms31_vowel.txt	20	B1	B	v	spectral	1.02078269473958
bms31_vowel.txt	21	B2	B	v	spectral	1.02178148912982
bms31_vowel.txt	22	B2	B	v	spectral	0.949002914779834
bms31_vowel.txt	23	B2	B	v	spectral	0.97899193100388
bms31_vowel.txt	24	B2	B	v	spectral	0.982538919069023
bms31_vowel.txt	25	B2	B	v	spectral	1.01190614878693
bms31_vowel.txt	26	B2	B	v	spectral	1.00705168268905
bms31_vowel.txt	27	B2	B	v	spectral	1.00022685210095
bms31_vowel.txt	28	B2	B	v	spectral	0.955170461544423
bms31_vowel.txt	29	B2	B	v	spectral	0.985889526905139
bms31_vowel.txt	30	B2	B	v	spectral	1.02565811503715
bms31_vowel.txt	31	B2	B	v	spectral	0.932342333625559
bms31_vowel.txt	32	B2	B	v	spectral	0.949820054023186
bms31_vowel.txt	33	B2	B	v	spectral	0.955586273119058
bms31_vowel.txt	34	B2	B	v	spectral	1.00436073750025
bms31_vowel.txt	35	B2	B	v	spectral	0.960424552252623
bms31_vowel.txt	36	B2	B	v	spectral	1.01987221771878
bms31_vowel.txt	37	B2	B	v	spectral	0.966521263706966
bms31_vowel.txt	38	B2	B	v	spectral	0.974702785282876
bms31_vowel.txt	39	B2	B	v	spectral	1.00070882913827
bms31_vowel.txt	40	B2	B	v	spectral	0.990125999624086
bms31_vowel.txt	41	B3	B	v	spectral	0.976404875523269
bms31_vowel.txt	42	B3	B	v	spectral	0.990661216046562
bms31_vowel.txt	43	B3	B	v	spectral	0.999480813700854
bms31_vowel.txt	44	B3	B	v	spectral	1.00007013143266
bms31_vowel.txt	45	B3	B	v	spectral	0.969240047451136
bms31_vowel.txt	46	B3	B	v	spectral	0.935800860704949
bms31_vowel.txt	47	B3	B	v	spectral	0.996062723532259
bms31_vowel.txt	48	B3	B	v	spectral	0.964829209312053
bms31_vowel.txt	49	B3	B	v	spectral	0.990825199077768
bms31_vowel.txt	50	B3	B	v	spectral	0.927573781731865
bms31_vowel.txt	51	B3	B	v	spectral	0.95408758390698
bms31_vowel.txt	52	B3	B	v	spectral	0.975331411230318
bms31_vowel.txt	53	B3	B	v	spectral	0.919987096130863
bms31_vowel.txt	54	B3	B	v	spectral	0.99729554626551
bms31_vowel.txt	55	B3	B	v	spectral	NA
bms31_vowel.txt	56	B3	B	v	spectral	0.969429438377846
bms31_vowel.txt	57	B3	B	v	spectral	0.957660325512374
bms31_vowel.txt	58	B3	B	v	spectral	0.984103252624038
bms31_vowel.txt	59	B3	B	v	spectral	0.942060997554499
bms31_vowel.txt	60	B3	B	v	spectral	0.947924646050967
bms31_vowel.txt	61	B4	B	v	spectral	0.967639899663153
bms31_vowel.txt	62	B4	B	v	spectral	0.965656776608022
bms31_vowel.txt	63	B4	B	v	spectral	1.01805500854577
bms31_vowel.txt	64	B4	B	v	spectral	1.01482036758773
bms31_vowel.txt	65	B4	B	v	spectral	1.01304641499312
bms31_vowel.txt	66	B4	B	v	spectral	0.994964007136965
bms31_vowel.txt	67	B4	B	v	spectral	0.966555880392958
bms31_vowel.txt	68	B4	B	v	spectral	0.985418289196965
bms31_vowel.txt	69	B4	B	v	spectral	0.984800203526669
bms31_vowel.txt	70	B4	B	v	spectral	0.968843005113439
bms31_vowel.txt	71	B4	B	v	spectral	0.957009516938134
bms31_vowel.txt	72	B4	B	v	spectral	0.954935922278145
bms31_vowel.txt	73	B4	B	v	spectral	0.957697216566594
bms31_vowel.txt	74	B4	B	v	spectral	0.974840332746877
bms31_vowel.txt	75	B4	B	v	spectral	0.97317958477178
bms31_vowel.txt	76	B4	B	v	spectral	NA
bms31_vowel.txt	78	B4	B	v	spectral	1.01909389387382
bms31_vowel.txt	79	B4	B	v	spectral	NA
bms31_vowel.txt	80	B4	B	v	spectral	NA
bms31_vowel.txt	81	B5	B	v	spectral	1.02730443025797
bms31_vowel.txt	82	B5	B	v	spectral	0.991920958913876
bms31_vowel.txt	83	B5	B	v	spectral	0.974705570899896
bms31_vowel.txt	84	B5	B	v	spectral	0.971689601573292
bms31_vowel.txt	85	B5	B	v	spectral	1.01642679223586
bms31_vowel.txt	86	B5	B	v	spectral	0.992345370391365
bms31_vowel.txt	87	B5	B	v	spectral	NA
bms31_vowel.txt	88	B5	B	v	spectral	1.02518750066106
bms31_vowel.txt	89	B5	B	v	spectral	0.969011381559904
bms31_vowel.txt	90	B5	B	v	spectral	0.996699686732578
bms31_vowel.txt	91	B5	B	v	spectral	1.00687420785389
bms31_vowel.txt	92	B5	B	v	spectral	0.977865839294297
bms31_vowel.txt	93	B5	B	v	spectral	1.0028309724506
bms31_vowel.txt	94	B5	B	v	spectral	0.949483534506905
bms31_vowel.txt	95	B5	B	v	spectral	0.96402020259806
bms31_vowel.txt	96	B5	B	v	spectral	0.969979829108268
bms31_vowel.txt	97	B5	B	v	spectral	1.02356506873427
bms31_vowel.txt	98	B5	B	v	spectral	1.00915273140334
bms31_vowel.txt	99	B5	B	v	spectral	1.01084855805122
bms31_vowel.txt	100	B5	B	v	spectral	1.01648351467122
bms31_vowel.txt	1	B1	R	v	spectral	0.936414190285355
bms31_vowel.txt	2	B1	R	v	spectral	0.953552135844695
bms31_vowel.txt	3	B1	R	v	spectral	0.989355491231989
bms31_vowel.txt	4	B1	R	v	spectral	0.985013627837278
bms31_vowel.txt	5	B1	R	v	spectral	0.987629275967881
bms31_vowel.txt	6	B1	R	v	spectral	1.00971480632901
bms31_vowel.txt	7	B1	R	v	spectral	0.978204453920274
bms31_vowel.txt	8	B1	R	v	spectral	0.983054576369078
bms31_vowel.txt	9	B1	R	v	spectral	0.99250707456735
bms31_vowel.txt	10	B1	R	v	spectral	0.974026681834288
bms31_vowel.txt	11	B1	R	v	spectral	0.985783247387289
bms31_vowel.txt	12	B1	R	v	spectral	0.997608961891407
bms31_vowel.txt	13	B1	R	v	spectral	1.00058885161987
bms31_vowel.txt	14	B1	R	v	spectral	0.993716635535447
bms31_vowel.txt	15	B1	R	v	spectral	1.01325387425347
bms31_vowel.txt	16	B1	R	v	spectral	1.07907142596631
bms31_vowel.txt	17	B1	R	v	spectral	1.05418632677234
bms31_vowel.txt	18	B1	R	v	spectral	1.03965382036078
bms31_vowel.txt	19	B1	R	v	spectral	1.04666454202588
bms31_vowel.txt	20	B1	R	v	spectral	NA
bms31_vowel.txt	21	B2	R	v	spectral	0.985702090085797
bms31_vowel.txt	22	B2	R	v	spectral	0.974511571137346
bms31_vowel.txt	23	B2	R	v	spectral	0.96357644214547
bms31_vowel.txt	24	B2	R	v	spectral	0.978734154745308
bms31_vowel.txt	25	B2	R	v	spectral	0.937033044717126
bms31_vowel.txt	26	B2	R	v	spectral	0.996112751534266
bms31_vowel.txt	27	B2	R	v	spectral	1.07661697851192
bms31_vowel.txt	28	B2	R	v	spectral	1.0392319994
bms31_vowel.txt	29	B2	R	v	spectral	1.05475885020804
bms31_vowel.txt	30	B2	R	v	spectral	0.962822631190513
bms31_vowel.txt	31	B2	R	v	spectral	0.969965979063053
bms31_vowel.txt	32	B2	R	v	spectral	NA
bms31_vowel.txt	33	B2	R	v	spectral	0.965955858390852
bms31_vowel.txt	34	B2	R	v	spectral	1.06109592481855
bms31_vowel.txt	35	B2	R	v	spectral	0.999547551058236
bms31_vowel.txt	36	B2	R	v	spectral	0.946994795244376
bms31_vowel.txt	37	B2	R	v	spectral	0.977934896387359
bms31_vowel.txt	38	B2	R	v	spectral	1.00273487067688
bms31_vowel.txt	39	B2	R	v	spectral	0.947898523643498
bms31_vowel.txt	40	B2	R	v	spectral	0.98813510083026
bms31_vowel.txt	41	B3	R	v	spectral	0.981612044538321
bms31_vowel.txt	42	B3	R	v	spectral	0.984295614524039
bms31_vowel.txt	43	B3	R	v	spectral	1.01133975325408
bms31_vowel.txt	44	B3	R	v	spectral	0.976264234017647
bms31_vowel.txt	45	B3	R	v	spectral	0.927813771083524
bms31_vowel.txt	46	B3	R	v	spectral	0.906363947702417
bms31_vowel.txt	47	B3	R	v	spectral	0.933218413151388
bms31_vowel.txt	48	B3	R	v	spectral	0.967342199860245
bms31_vowel.txt	49	B3	R	v	spectral	0.959901766091653
bms31_vowel.txt	50	B3	R	v	spectral	0.963706126972648
bms31_vowel.txt	51	B3	R	v	spectral	NA
bms31_vowel.txt	52	B3	R	v	spectral	0.954475383067822
bms31_vowel.txt	53	B3	R	v	spectral	0.894551963066775
bms31_vowel.txt	54	B3	R	v	spectral	0.900215970015556
bms31_vowel.txt	55	B3	R	v	spectral	0.886098641304967
bms31_vowel.txt	56	B3	R	v	spectral	0.908493129730799
bms31_vowel.txt	57	B3	R	v	spectral	0.961845542704276
bms31_vowel.txt	58	B3	R	v	spectral	0.937585834475218
bms31_vowel.txt	59	B3	R	v	spectral	0.994600104426338
bms31_vowel.txt	60	B3	R	v	spectral	0.907800247503486
bms31_vowel.txt	61	B4	R	v	spectral	0.94438311798719
bms31_vowel.txt	62	B4	R	v	spectral	1.00711610849623
bms31_vowel.txt	63	B4	R	v	spectral	1.02199588749648
bms31_vowel.txt	64	B4	R	v	spectral	1.02556731696012
bms31_vowel.txt	65	B4	R	v	spectral	0.976201809963208
bms31_vowel.txt	66	B4	R	v	spectral	0.97209968484612
bms31_vowel.txt	67	B4	R	v	spectral	0.96194346359659
bms31_vowel.txt	68	B4	R	v	spectral	0.968493696849516
bms31_vowel.txt	69	B4	R	v	spectral	0.896743086855141
bms31_vowel.txt	70	B4	R	v	spectral	1.01777090901208
bms31_vowel.txt	71	B4	R	v	spectral	0.975403363153781
bms31_vowel.txt	72	B4	R	v	spectral	0.890587377086244
bms31_vowel.txt	73	B4	R	v	spectral	0.946445094399144
bms31_vowel.txt	74	B4	R	v	spectral	0.932261376077737
bms31_vowel.txt	75	B4	R	v	spectral	1.00101988191712
bms31_vowel.txt	76	B4	R	v	spectral	0.967804085341135
bms31_vowel.txt	77	B4	R	v	spectral	0.978195834071823
bms31_vowel.txt	78	B4	R	v	spectral	0.912843795490603
bms31_vowel.txt	79	B4	R	v	spectral	0.962480679575632
bms31_vowel.txt	80	B4	R	v	spectral	1.0425278533959
bms31_vowel.txt	81	B5	R	v	spectral	0.948195191952883
bms31_vowel.txt	82	B5	R	v	spectral	0.995265081477463
bms31_vowel.txt	83	B5	R	v	spectral	0.957468776664561
bms31_vowel.txt	84	B5	R	v	spectral	0.968597976137124
bms31_vowel.txt	85	B5	R	v	spectral	0.955688706227867
bms31_vowel.txt	86	B5	R	v	spectral	0.964930599752465
bms31_vowel.txt	87	B5	R	v	spectral	0.967371474838363
bms31_vowel.txt	88	B5	R	v	spectral	0.916144975009973
bms31_vowel.txt	89	B5	R	v	spectral	0.96973178895901
bms31_vowel.txt	90	B5	R	v	spectral	1.01616005306072
bms31_vowel.txt	91	B5	R	v	spectral	NA
bms31_vowel.txt	92	B5	R	v	spectral	0.973201961898646
bms31_vowel.txt	93	B5	R	v	spectral	1.02734606076669
bms31_vowel.txt	94	B5	R	v	spectral	0.927552833843649
bms31_vowel.txt	95	B5	R	v	spectral	0.9933648070328
bms31_vowel.txt	96	B5	R	v	spectral	1.00865611200505
bms31_vowel.txt	97	B5	R	v	spectral	0.962171562205861
bms31_vowel.txt	98	B5	R	v	spectral	0.994215338749264
bms31_vowel.txt	99	B5	R	v	spectral	1.01838499341142
bms31_vowel.txt	100	B5	R	v	spectral	0.971651292331222
bms31_vowel.txt	1	B1	L	v	spectral	0.987382300871278
bms31_vowel.txt	2	B1	L	v	spectral	NA
bms31_vowel.txt	3	B1	L	v	spectral	0.969265345620916
bms31_vowel.txt	4	B1	L	v	spectral	0.970965883858349
bms31_vowel.txt	5	B1	L	v	spectral	0.990407132048086
bms31_vowel.txt	6	B1	L	v	spectral	1.00930618452806
bms31_vowel.txt	7	B1	L	v	spectral	0.997290153080761
bms31_vowel.txt	8	B1	L	v	spectral	0.973154696990162
bms31_vowel.txt	9	B1	L	v	spectral	NA
bms31_vowel.txt	10	B1	L	v	spectral	1.01998233751241
bms31_vowel.txt	11	B1	L	v	spectral	1.00547877794531
bms31_vowel.txt	12	B1	L	v	spectral	1.02528277679521
bms31_vowel.txt	13	B1	L	v	spectral	0.982423713211289
bms31_vowel.txt	14	B1	L	v	spectral	1.02483515393519
bms31_vowel.txt	15	B1	L	v	spectral	1.01959661447712
bms31_vowel.txt	16	B1	L	v	spectral	1.02404110842746
bms31_vowel.txt	17	B1	L	v	spectral	0.999271733576427
bms31_vowel.txt	18	B1	L	v	spectral	1.00799398821871
bms31_vowel.txt	19	B1	L	v	spectral	0.973657033370345
bms31_vowel.txt	20	B1	L	v	spectral	1.01966506553292
bms31_vowel.txt	21	B2	L	v	spectral	0.961257821809471
bms31_vowel.txt	22	B2	L	v	spectral	0.950680134623036
bms31_vowel.txt	23	B2	L	v	spectral	0.972155408552036
bms31_vowel.txt	24	B2	L	v	spectral	1.01359845621716
bms31_vowel.txt	25	B2	L	v	spectral	0.946264010062375
bms31_vowel.txt	26	B2	L	v	spectral	1.02393111356592
bms31_vowel.txt	27	B2	L	v	spectral	0.961053015342143
bms31_vowel.txt	28	B2	L	v	spectral	1.03622542722472
bms31_vowel.txt	29	B2	L	v	spectral	1.00089780492701
bms31_vowel.txt	30	B2	L	v	spectral	1.01450379747807
bms31_vowel.txt	31	B2	L	v	spectral	0.964991090388614
bms31_vowel.txt	32	B2	L	v	spectral	1.00833703772266
bms31_vowel.txt	33	B2	L	v	spectral	1.01261282930548
bms31_vowel.txt	34	B2	L	v	spectral	0.99232454475609
bms31_vowel.txt	35	B2	L	v	spectral	0.9870105893437
bms31_vowel.txt	36	B2	L	v	spectral	1.01090451282625
bms31_vowel.txt	37	B2	L	v	spectral	1.01298248588973
bms31_vowel.txt	38	B2	L	v	spectral	0.957856576147975
bms31_vowel.txt	39	B2	L	v	spectral	1.02638173462541
bms31_vowel.txt	40	B2	L	v	spectral	0.996864738546121
bms31_vowel.txt	41	B3	L	v	spectral	0.972517684337866
bms31_vowel.txt	42	B3	L	v	spectral	0.96858096045911
bms31_vowel.txt	43	B3	L	v	spectral	NA
bms31_vowel.txt	44	B3	L	v	spectral	1.04022073174559
bms31_vowel.txt	45	B3	L	v	spectral	0.981154246826825
bms31_vowel.txt	46	B3	L	v	spectral	0.980291587582865
bms31_vowel.txt	47	B3	L	v	spectral	0.968203469013156
bms31_vowel.txt	48	B3	L	v	spectral	1.01079293213309
bms31_vowel.txt	49	B3	L	v	spectral	0.954423947128838
bms31_vowel.txt	50	B3	L	v	spectral	0.963806293506184
bms31_vowel.txt	51	B3	L	v	spectral	0.922575419770133
bms31_vowel.txt	52	B3	L	v	spectral	0.897367680283316
bms31_vowel.txt	53	B3	L	v	spectral	0.976168422957447
bms31_vowel.txt	54	B3	L	v	spectral	0.94433652747183
bms31_vowel.txt	55	B3	L	v	spectral	0.946358230386204
bms31_vowel.txt	56	B3	L	v	spectral	0.993153158320811
bms31_vowel.txt	57	B3	L	v	spectral	0.985909417557631
bms31_vowel.txt	58	B3	L	v	spectral	0.968826676887093
bms31_vowel.txt	59	B3	L	v	spectral	0.94351846062537
bms31_vowel.txt	60	B3	L	v	spectral	0.929406007675751
bms31_vowel.txt	61	B4	L	v	spectral	0.987549563402848
bms31_vowel.txt	62	B4	L	v	spectral	1.02226507173316
bms31_vowel.txt	63	B4	L	v	spectral	0.982798183935759
bms31_vowel.txt	64	B4	L	v	spectral	0.961039968636941
bms31_vowel.txt	65	B4	L	v	spectral	0.971437353228221
bms31_vowel.txt	66	B4	L	v	spectral	1.06914810530583
bms31_vowel.txt	67	B4	L	v	spectral	1.01311320785517
bms31_vowel.txt	68	B4	L	v	spectral	1.02880324251994
bms31_vowel.txt	69	B4	L	v	spectral	NA
bms31_vowel.txt	70	B4	L	v	spectral	0.928845269605156
bms31_vowel.txt	71	B4	L	v	spectral	0.962560221382291
bms31_vowel.txt	72	B4	L	v	spectral	0.973119539871378
bms31_vowel.txt	73	B4	L	v	spectral	0.999477950673982
bms31_vowel.txt	74	B4	L	v	spectral	1.05897568361172
bms31_vowel.txt	75	B4	L	v	spectral	1.00341230383885
bms31_vowel.txt	76	B4	L	v	spectral	1.00504919100998
bms31_vowel.txt	77	B4	L	v	spectral	1.02306785474277
bms31_vowel.txt	78	B4	L	v	spectral	0.934891497851425
bms31_vowel.txt	79	B4	L	v	spectral	1.07134131376915
bms31_vowel.txt	80	B4	L	v	spectral	0.998674212202607
bms31_vowel.txt	81	B5	L	v	spectral	1.01715955450453
bms31_vowel.txt	82	B5	L	v	spectral	1.03529744035717
bms31_vowel.txt	83	B5	L	v	spectral	1.02445165138597
bms31_vowel.txt	84	B5	L	v	spectral	1.01679847162644
bms31_vowel.txt	85	B5	L	v	spectral	NA
bms31_vowel.txt	86	B5	L	v	spectral	0.983420992425135
bms31_vowel.txt	87	B5	L	v	spectral	0.959921024543955
bms31_vowel.txt	88	B5	L	v	spectral	1.09500586812243
bms31_vowel.txt	89	B5	L	v	spectral	0.958079873057265
bms31_vowel.txt	90	B5	L	v	spectral	0.985358013508098
bms31_vowel.txt	91	B5	L	v	spectral	0.992761993486581
bms31_vowel.txt	92	B5	L	v	spectral	1.05485085193686
bms31_vowel.txt	93	B5	L	v	spectral	1.00014967309996
bms31_vowel.txt	94	B5	L	v	spectral	0.977389479308024
bms31_vowel.txt	95	B5	L	v	spectral	1.00729315483141
bms31_vowel.txt	96	B5	L	v	spectral	1.00311511902339
bms31_vowel.txt	97	B5	L	v	spectral	1.00621085776941
bms31_vowel.txt	98	B5	L	v	spectral	1.02501755954103
bms31_vowel.txt	99	B5	L	v	spectral	1.00399333908116
bms31_vowel.txt	100	B5	L	v	spectral	0.954798614298812
gsx11_vowel.txt	1	B1	0KG	v	spectral	1.05756921994513
gsx11_vowel.txt	2	B1	0KG	v	spectral	0.97478364784925
gsx11_vowel.txt	3	B1	0KG	v	spectral	1.02328842213955
gsx11_vowel.txt	4	B1	0KG	v	spectral	1.04297127193692
gsx11_vowel.txt	5	B1	0KG	v	spectral	1.01953082318553
gsx11_vowel.txt	6	B1	0KG	v	spectral	1.04813597113214
gsx11_vowel.txt	7	B1	0KG	v	spectral	1.00759381337161
gsx11_vowel.txt	8	B1	0KG	v	spectral	1.02649214605619
gsx11_vowel.txt	9	B1	0KG	v	spectral	1.00017121709942
gsx11_vowel.txt	10	B1	0KG	v	spectral	0.987591356613489
gsx11_vowel.txt	11	B1	0KG	v	spectral	0.982761043149193
gsx11_vowel.txt	12	B1	0KG	v	spectral	1.01413886736819
gsx11_vowel.txt	13	B1	0KG	v	spectral	0.94135397694885
gsx11_vowel.txt	14	B1	0KG	v	spectral	0.969256795458278
gsx11_vowel.txt	15	B1	0KG	v	spectral	0.994941396755543
gsx11_vowel.txt	16	B1	0KG	v	spectral	0.953194390932311
gsx11_vowel.txt	17	B1	0KG	v	spectral	0.983044230450427
gsx11_vowel.txt	18	B1	0KG	v	spectral	1.01519846223283
gsx11_vowel.txt	19	B1	0KG	v	spectral	0.975734645333025
gsx11_vowel.txt	20	B1	0KG	v	spectral	0.982248302042127
gsx11_vowel.txt	21	B2	0KG	v	spectral	0.968960005947328
gsx11_vowel.txt	22	B2	0KG	v	spectral	0.963675512699861
gsx11_vowel.txt	23	B2	0KG	v	spectral	0.949911800933091
gsx11_vowel.txt	24	B2	0KG	v	spectral	0.980495530626952
gsx11_vowel.txt	25	B2	0KG	v	spectral	0.964984865852265
gsx11_vowel.txt	26	B2	0KG	v	spectral	0.945323877798876
gsx11_vowel.txt	27	B2	0KG	v	spectral	NA
gsx11_vowel.txt	28	B2	0KG	v	spectral	0.997959554937832
gsx11_vowel.txt	29	B2	0KG	v	spectral	0.99165619538917
gsx11_vowel.txt	30	B2	0KG	v	spectral	0.971269612877025
gsx11_vowel.txt	31	B2	0KG	v	spectral	0.994398571317995
gsx11_vowel.txt	32	B2	0KG	v	spectral	0.949120470130755
gsx11_vowel.txt	33	B2	0KG	v	spectral	0.978180933635232
gsx11_vowel.txt	34	B2	0KG	v	spectral	0.969618459660197
gsx11_vowel.txt	35	B2	0KG	v	spectral	0.981487730889231
gsx11_vowel.txt	36	B2	0KG	v	spectral	0.990169782471898
gsx11_vowel.txt	37	B2	0KG	v	spectral	NA
gsx11_vowel.txt	38	B2	0KG	v	spectral	0.928285787196092
gsx11_vowel.txt	39	B2	0KG	v	spectral	0.974274170306933
gsx11_vowel.txt	40	B2	0KG	v	spectral	0.993645057466818
gsx11_vowel.txt	41	B3	0KG	v	spectral	0.920619991646029
gsx11_vowel.txt	42	B3	0KG	v	spectral	NA
gsx11_vowel.txt	43	B3	0KG	v	spectral	0.935675176534299
gsx11_vowel.txt	44	B3	0KG	v	spectral	0.946103462061553
gsx11_vowel.txt	45	B3	0KG	v	spectral	0.951873729038146
gsx11_vowel.txt	46	B3	0KG	v	spectral	0.938505491140427
gsx11_vowel.txt	47	B3	0KG	v	spectral	0.930933454612134
gsx11_vowel.txt	48	B3	0KG	v	spectral	0.909042434098295
gsx11_vowel.txt	49	B3	0KG	v	spectral	0.953468045794045
gsx11_vowel.txt	50	B3	0KG	v	spectral	0.912917136632147
gsx11_vowel.txt	51	B3	0KG	v	spectral	0.913062540728039
gsx11_vowel.txt	52	B3	0KG	v	spectral	0.948233302909033
gsx11_vowel.txt	53	B3	0KG	v	spectral	0.91409358098995
gsx11_vowel.txt	54	B3	0KG	v	spectral	0.931261797802272
gsx11_vowel.txt	55	B3	0KG	v	spectral	0.920338440058087
gsx11_vowel.txt	56	B3	0KG	v	spectral	0.921482049538636
gsx11_vowel.txt	57	B3	0KG	v	spectral	0.911563193726893
gsx11_vowel.txt	58	B3	0KG	v	spectral	0.875913223550342
gsx11_vowel.txt	59	B3	0KG	v	spectral	NA
gsx11_vowel.txt	60	B3	0KG	v	spectral	0.929926416046948
gsx11_vowel.txt	61	B4	0KG	v	spectral	1.00557372532556
gsx11_vowel.txt	62	B4	0KG	v	spectral	0.988557181920882
gsx11_vowel.txt	63	B4	0KG	v	spectral	0.994865999114727
gsx11_vowel.txt	64	B4	0KG	v	spectral	0.937482919567081
gsx11_vowel.txt	65	B4	0KG	v	spectral	0.966392595031412
gsx11_vowel.txt	66	B4	0KG	v	spectral	0.99121015838977
gsx11_vowel.txt	67	B4	0KG	v	spectral	0.932534078363244
gsx11_vowel.txt	68	B4	0KG	v	spectral	0.978535510661658
gsx11_vowel.txt	69	B4	0KG	v	spectral	0.977484303261001
gsx11_vowel.txt	70	B4	0KG	v	spectral	0.916197533286465
gsx11_vowel.txt	71	B4	0KG	v	spectral	1.00952527093788
gsx11_vowel.txt	72	B4	0KG	v	spectral	0.920832168882011
gsx11_vowel.txt	73	B4	0KG	v	spectral	0.968848087036133
gsx11_vowel.txt	74	B4	0KG	v	spectral	0.978310232672595
gsx11_vowel.txt	75	B4	0KG	v	spectral	NA
gsx11_vowel.txt	76	B4	0KG	v	spectral	0.993799342189814
gsx11_vowel.txt	77	B4	0KG	v	spectral	1.01637181385218
gsx11_vowel.txt	78	B4	0KG	v	spectral	0.942233126501506
gsx11_vowel.txt	79	B4	0KG	v	spectral	0.947653972405074
gsx11_vowel.txt	80	B4	0KG	v	spectral	0.917103535705145
gsx11_vowel.txt	81	B5	0KG	v	spectral	0.96095471496333
gsx11_vowel.txt	82	B5	0KG	v	spectral	0.93459703821252
gsx11_vowel.txt	83	B5	0KG	v	spectral	0.959069647059784
gsx11_vowel.txt	84	B5	0KG	v	spectral	0.927336046311278
gsx11_vowel.txt	85	B5	0KG	v	spectral	0.976405635228012
gsx11_vowel.txt	86	B5	0KG	v	spectral	0.929566361182489
gsx11_vowel.txt	87	B5	0KG	v	spectral	0.975216996130503
gsx11_vowel.txt	88	B5	0KG	v	spectral	0.927404358906535
gsx11_vowel.txt	89	B5	0KG	v	spectral	0.915688617111433
gsx11_vowel.txt	90	B5	0KG	v	spectral	0.931520155556125
gsx11_vowel.txt	91	B5	0KG	v	spectral	0.921543128660415
gsx11_vowel.txt	92	B5	0KG	v	spectral	0.972694684196565
gsx11_vowel.txt	93	B5	0KG	v	spectral	0.928731002355425
gsx11_vowel.txt	94	B5	0KG	v	spectral	0.905385331166027
gsx11_vowel.txt	95	B5	0KG	v	spectral	0.940858653059109
gsx11_vowel.txt	96	B5	0KG	v	spectral	0.952632018194829
gsx11_vowel.txt	97	B5	0KG	v	spectral	0.967932517591307
gsx11_vowel.txt	98	B5	0KG	v	spectral	0.933318799560903
gsx11_vowel.txt	99	B5	0KG	v	spectral	0.961128031713411
gsx11_vowel.txt	100	B5	0KG	v	spectral	0.945135098460713
gsx11_vowel.txt	1	B1	B	v	spectral	1.05272546818461
gsx11_vowel.txt	2	B1	B	v	spectral	1.05062814686005
gsx11_vowel.txt	3	B1	B	v	spectral	1.00751682221077
gsx11_vowel.txt	4	B1	B	v	spectral	0.99989725555532
gsx11_vowel.txt	5	B1	B	v	spectral	1.00744437748739
gsx11_vowel.txt	6	B1	B	v	spectral	0.976162157477054
gsx11_vowel.txt	7	B1	B	v	spectral	1.00331809733628
gsx11_vowel.txt	8	B1	B	v	spectral	1.00582459221711
gsx11_vowel.txt	9	B1	B	v	spectral	1.00193608753153
gsx11_vowel.txt	10	B1	B	v	spectral	0.969208571578
gsx11_vowel.txt	11	B1	B	v	spectral	0.970809459328451
gsx11_vowel.txt	12	B1	B	v	spectral	0.975818321221029
gsx11_vowel.txt	13	B1	B	v	spectral	0.964775313677776
gsx11_vowel.txt	14	B1	B	v	spectral	0.997973139759146
gsx11_vowel.txt	15	B1	B	v	spectral	1.003059370473
gsx11_vowel.txt	16	B1	B	v	spectral	1.00869931728963
gsx11_vowel.txt	17	B1	B	v	spectral	0.992453767663006
gsx11_vowel.txt	18	B1	B	v	spectral	1.03123221494571
gsx11_vowel.txt	19	B1	B	v	spectral	NA
gsx11_vowel.txt	20	B1	B	v	spectral	0.98051751920414
gsx11_vowel.txt	21	B2	B	v	spectral	0.990103483364788
gsx11_vowel.txt	22	B2	B	v	spectral	0.993045807766006
gsx11_vowel.txt	23	B2	B	v	spectral	0.983997669780353
gsx11_vowel.txt	24	B2	B	v	spectral	0.978674766777012
gsx11_vowel.txt	25	B2	B	v	spectral	0.991021150636739
gsx11_vowel.txt	26	B2	B	v	spectral	0.968635697119479
gsx11_vowel.txt	27	B2	B	v	spectral	0.977067368053894
gsx11_vowel.txt	28	B2	B	v	spectral	0.948447997236324
gsx11_vowel.txt	29	B2	B	v	spectral	1.00967604499417
gsx11_vowel.txt	30	B2	B	v	spectral	0.979942952595572
gsx11_vowel.txt	31	B2	B	v	spectral	0.991710045738457
gsx11_vowel.txt	32	B2	B	v	spectral	0.961083810446588
gsx11_vowel.txt	33	B2	B	v	spectral	0.977181799039615
gsx11_vowel.txt	34	B2	B	v	spectral	0.964712474582776
gsx11_vowel.txt	35	B2	B	v	spectral	0.985933376752185
gsx11_vowel.txt	36	B2	B	v	spectral	0.995678176044096
gsx11_vowel.txt	37	B2	B	v	spectral	0.968026710122736
gsx11_vowel.txt	38	B2	B	v	spectral	0.991510494759012
gsx11_vowel.txt	39	B2	B	v	spectral	NA
gsx11_vowel.txt	40	B2	B	v	spectral	0.956003233352513
gsx11_vowel.txt	41	B3	B	v	spectral	0.983515155128927
gsx11_vowel.txt	42	B3	B	v	spectral	0.884792056689037
gsx11_vowel.txt	43	B3	B	v	spectral	0.920635915036408
gsx11_vowel.txt	44	B3	B	v	spectral	0.951347095383603
gsx11_vowel.txt	45	B3	B	v	spectral	0.93321836426985
gsx11_vowel.txt	46	B3	B	v	spectral	NA
gsx11_vowel.txt	47	B3	B	v	spectral	0.922250182877561
gsx11_vowel.txt	48	B3	B	v	spectral	0.911869814945125
gsx11_vowel.txt	49	B3	B	v	spectral	0.949388071305272
gsx11_vowel.txt	50	B3	B	v	spectral	0.991121875764607
gsx11_vowel.txt	51	B3	B	v	spectral	0.97927520914469
gsx11_vowel.txt	52	B3	B	v	spectral	0.975122811007066
gsx11_vowel.txt	53	B3	B	v	spectral	0.934256115840583
gsx11_vowel.txt	54	B3	B	v	spectral	0.919214926866767
gsx11_vowel.txt	55	B3	B	v	spectral	0.975855758492621
gsx11_vowel.txt	56	B3	B	v	spectral	0.942471323203765
gsx11_vowel.txt	57	B3	B	v	spectral	0.931969431008896
gsx11_vowel.txt	58	B3	B	v	spectral	0.889748097271453
gsx11_vowel.txt	59	B3	B	v	spectral	0.968231743795016
gsx11_vowel.txt	60	B3	B	v	spectral	0.944408355461605
gsx11_vowel.txt	61	B4	B	v	spectral	0.976976671217852
gsx11_vowel.txt	62	B4	B	v	spectral	0.976230331410156
gsx11_vowel.txt	63	B4	B	v	spectral	0.921305490584582
gsx11_vowel.txt	64	B4	B	v	spectral	0.90557184805273
gsx11_vowel.txt	65	B4	B	v	spectral	0.990262392336577
gsx11_vowel.txt	66	B4	B	v	spectral	0.991885786539893
gsx11_vowel.txt	67	B4	B	v	spectral	0.963965257679239
gsx11_vowel.txt	68	B4	B	v	spectral	0.909161244494999
gsx11_vowel.txt	69	B4	B	v	spectral	0.959788522437424
gsx11_vowel.txt	70	B4	B	v	spectral	0.952880229977318
gsx11_vowel.txt	71	B4	B	v	spectral	0.91076976372297
gsx11_vowel.txt	72	B4	B	v	spectral	0.971893003098965
gsx11_vowel.txt	73	B4	B	v	spectral	0.880769916771131
gsx11_vowel.txt	74	B4	B	v	spectral	0.896109681998206
gsx11_vowel.txt	75	B4	B	v	spectral	0.947764727657833
gsx11_vowel.txt	76	B4	B	v	spectral	0.983810562449854
gsx11_vowel.txt	77	B4	B	v	spectral	0.901036943892121
gsx11_vowel.txt	78	B4	B	v	spectral	0.952535339999356
gsx11_vowel.txt	79	B4	B	v	spectral	0.954714548971292
gsx11_vowel.txt	80	B4	B	v	spectral	0.950537513019556
gsx11_vowel.txt	81	B5	B	v	spectral	0.964207968103278
gsx11_vowel.txt	82	B5	B	v	spectral	0.922006759720413
gsx11_vowel.txt	83	B5	B	v	spectral	0.945509492198731
gsx11_vowel.txt	84	B5	B	v	spectral	0.963880523156101
gsx11_vowel.txt	85	B5	B	v	spectral	0.957253607076499
gsx11_vowel.txt	86	B5	B	v	spectral	0.992239255722021
gsx11_vowel.txt	87	B5	B	v	spectral	0.942651527571771
gsx11_vowel.txt	88	B5	B	v	spectral	0.898677131216629
gsx11_vowel.txt	89	B5	B	v	spectral	0.956643987685396
gsx11_vowel.txt	90	B5	B	v	spectral	0.999250089974946
gsx11_vowel.txt	91	B5	B	v	spectral	0.934894286835047
gsx11_vowel.txt	92	B5	B	v	spectral	0.913442846173294
gsx11_vowel.txt	93	B5	B	v	spectral	0.928742926717438
gsx11_vowel.txt	94	B5	B	v	spectral	0.968863851670832
gsx11_vowel.txt	95	B5	B	v	spectral	0.949003597020313
gsx11_vowel.txt	96	B5	B	v	spectral	0.949226255876729
gsx11_vowel.txt	97	B5	B	v	spectral	0.901831787830773
gsx11_vowel.txt	98	B5	B	v	spectral	0.935552574309846
gsx11_vowel.txt	99	B5	B	v	spectral	0.932135071465251
gsx11_vowel.txt	100	B5	B	v	spectral	1.0073218871507
gsx11_vowel.txt	1	B1	R	v	spectral	1.05254786233997
gsx11_vowel.txt	2	B1	R	v	spectral	1.06603275938591
gsx11_vowel.txt	3	B1	R	v	spectral	0.981444591507963
gsx11_vowel.txt	4	B1	R	v	spectral	1.03647967229966
gsx11_vowel.txt	5	B1	R	v	spectral	1.01488607306279
gsx11_vowel.txt	6	B1	R	v	spectral	1.03272068966528
gsx11_vowel.txt	7	B1	R	v	spectral	1.02394061282884
gsx11_vowel.txt	8	B1	R	v	spectral	0.972223864759121
gsx11_vowel.txt	9	B1	R	v	spectral	0.937950041765065
gsx11_vowel.txt	10	B1	R	v	spectral	1.02298261416037
gsx11_vowel.txt	11	B1	R	v	spectral	0.936946633073884
gsx11_vowel.txt	12	B1	R	v	spectral	0.963906837650674
gsx11_vowel.txt	13	B1	R	v	spectral	1.00000685027
gsx11_vowel.txt	14	B1	R	v	spectral	0.990799789050107
gsx11_vowel.txt	15	B1	R	v	spectral	1.0466519667394
gsx11_vowel.txt	16	B1	R	v	spectral	1.02374718630456
gsx11_vowel.txt	17	B1	R	v	spectral	0.974307352583196
gsx11_vowel.txt	18	B1	R	v	spectral	0.981762740577823
gsx11_vowel.txt	19	B1	R	v	spectral	0.992277410791793
gsx11_vowel.txt	20	B1	R	v	spectral	0.948384451183604
gsx11_vowel.txt	21	B2	R	v	spectral	1.00639246186851
gsx11_vowel.txt	22	B2	R	v	spectral	0.966296514575902
gsx11_vowel.txt	23	B2	R	v	spectral	0.97952758745097
gsx11_vowel.txt	24	B2	R	v	spectral	1.00575157755192
gsx11_vowel.txt	25	B2	R	v	spectral	0.920278695111528
gsx11_vowel.txt	26	B2	R	v	spectral	0.918185691048074
gsx11_vowel.txt	27	B2	R	v	spectral	NA
gsx11_vowel.txt	28	B2	R	v	spectral	0.973729154330819
gsx11_vowel.txt	29	B2	R	v	spectral	0.977641656728418
gsx11_vowel.txt	30	B2	R	v	spectral	0.935713098955633
gsx11_vowel.txt	31	B2	R	v	spectral	0.930113951552537
gsx11_vowel.txt	32	B2	R	v	spectral	1.01243598696212
gsx11_vowel.txt	33	B2	R	v	spectral	0.927631628239866
gsx11_vowel.txt	34	B2	R	v	spectral	0.944634098651022
gsx11_vowel.txt	35	B2	R	v	spectral	0.901100156358445
gsx11_vowel.txt	36	B2	R	v	spectral	0.935223462095811
gsx11_vowel.txt	37	B2	R	v	spectral	0.982687460305267
gsx11_vowel.txt	38	B2	R	v	spectral	0.961681579140049
gsx11_vowel.txt	39	B2	R	v	spectral	0.931012100775309
gsx11_vowel.txt	40	B2	R	v	spectral	0.981950844690421
gsx11_vowel.txt	41	B3	R	v	spectral	0.915938866743007
gsx11_vowel.txt	42	B3	R	v	spectral	0.933705072857819
gsx11_vowel.txt	43	B3	R	v	spectral	0.92924841943959
gsx11_vowel.txt	44	B3	R	v	spectral	0.919551525903879
gsx11_vowel.txt	45	B3	R	v	spectral	0.909290536278092
gsx11_vowel.txt	46	B3	R	v	spectral	0.883595489952155
gsx11_vowel.txt	47	B3	R	v	spectral	0.897735817997265
gsx11_vowel.txt	48	B3	R	v	spectral	0.900926597079311
gsx11_vowel.txt	49	B3	R	v	spectral	0.875487094040993
gsx11_vowel.txt	50	B3	R	v	spectral	0.940117629069454
gsx11_vowel.txt	51	B3	R	v	spectral	0.882515029212634
gsx11_vowel.txt	52	B3	R	v	spectral	0.906700498654228
gsx11_vowel.txt	53	B3	R	v	spectral	0.889259254644897
gsx11_vowel.txt	54	B3	R	v	spectral	0.893812851562997
gsx11_vowel.txt	55	B3	R	v	spectral	0.91799600060516
gsx11_vowel.txt	56	B3	R	v	spectral	0.910988427522944
gsx11_vowel.txt	57	B3	R	v	spectral	0.879056480942858
gsx11_vowel.txt	58	B3	R	v	spectral	0.918723409262582
gsx11_vowel.txt	59	B3	R	v	spectral	0.908906582057088
gsx11_vowel.txt	60	B3	R	v	spectral	NA
gsx11_vowel.txt	61	B4	R	v	spectral	0.939359384728699
gsx11_vowel.txt	62	B4	R	v	spectral	0.918431171165482
gsx11_vowel.txt	63	B4	R	v	spectral	0.921703349824048
gsx11_vowel.txt	64	B4	R	v	spectral	0.952104315346312
gsx11_vowel.txt	65	B4	R	v	spectral	0.878706511439299
gsx11_vowel.txt	66	B4	R	v	spectral	0.899030921733323
gsx11_vowel.txt	67	B4	R	v	spectral	0.905026778476389
gsx11_vowel.txt	68	B4	R	v	spectral	0.936447859520393
gsx11_vowel.txt	69	B4	R	v	spectral	0.982235018475832
gsx11_vowel.txt	70	B4	R	v	spectral	0.964836034944996
gsx11_vowel.txt	71	B4	R	v	spectral	0.966539250151197
gsx11_vowel.txt	72	B4	R	v	spectral	1.00054660002004
gsx11_vowel.txt	73	B4	R	v	spectral	0.992177611275628
gsx11_vowel.txt	74	B4	R	v	spectral	NA
gsx11_vowel.txt	75	B4	R	v	spectral	0.917516720225034
gsx11_vowel.txt	76	B4	R	v	spectral	0.942129857895512
gsx11_vowel.txt	77	B4	R	v	spectral	0.968103462620937
gsx11_vowel.txt	78	B4	R	v	spectral	1.00641622533817
gsx11_vowel.txt	79	B4	R	v	spectral	1.0232990186593
gsx11_vowel.txt	80	B4	R	v	spectral	1.00891457985918
gsx11_vowel.txt	81	B5	R	v	spectral	0.937822857058523
gsx11_vowel.txt	82	B5	R	v	spectral	0.92226834930517
gsx11_vowel.txt	83	B5	R	v	spectral	0.982488413580369
gsx11_vowel.txt	84	B5	R	v	spectral	0.975211681393529
gsx11_vowel.txt	85	B5	R	v	spectral	0.970511211320808
gsx11_vowel.txt	86	B5	R	v	spectral	0.947466355834965
gsx11_vowel.txt	87	B5	R	v	spectral	0.97424648501842
gsx11_vowel.txt	88	B5	R	v	spectral	1.00519965830063
gsx11_vowel.txt	89	B5	R	v	spectral	0.900891059840075
gsx11_vowel.txt	90	B5	R	v	spectral	0.903481526529551
gsx11_vowel.txt	91	B5	R	v	spectral	1.00621295569553
gsx11_vowel.txt	92	B5	R	v	spectral	1.00843536044961
gsx11_vowel.txt	93	B5	R	v	spectral	0.973140374209709
gsx11_vowel.txt	94	B5	R	v	spectral	0.971174886065209
gsx11_vowel.txt	95	B5	R	v	spectral	1.0027805926988
gsx11_vowel.txt	96	B5	R	v	spectral	0.923466877313972
gsx11_vowel.txt	97	B5	R	v	spectral	0.919693317426023
gsx11_vowel.txt	98	B5	R	v	spectral	1.03288129156743
gsx11_vowel.txt	99	B5	R	v	spectral	0.9504602570767
gsx11_vowel.txt	100	B5	R	v	spectral	0.911324409688449
gsx11_vowel.txt	1	B1	L	v	spectral	0.958006055483767
gsx11_vowel.txt	2	B1	L	v	spectral	0.987467923077633
gsx11_vowel.txt	3	B1	L	v	spectral	1.03342315645033
gsx11_vowel.txt	4	B1	L	v	spectral	1.02660936761281
gsx11_vowel.txt	5	B1	L	v	spectral	1.00653429013156
gsx11_vowel.txt	6	B1	L	v	spectral	1.05609439022907
gsx11_vowel.txt	7	B1	L	v	spectral	0.993539198573617
gsx11_vowel.txt	8	B1	L	v	spectral	1.01303399226191
gsx11_vowel.txt	9	B1	L	v	spectral	0.985952717462801
gsx11_vowel.txt	10	B1	L	v	spectral	0.988677942398327
gsx11_vowel.txt	11	B1	L	v	spectral	0.994495084120875
gsx11_vowel.txt	12	B1	L	v	spectral	0.973076812837668
gsx11_vowel.txt	13	B1	L	v	spectral	0.993933297834513
gsx11_vowel.txt	14	B1	L	v	spectral	0.989369580145477
gsx11_vowel.txt	15	B1	L	v	spectral	1.01703448414493
gsx11_vowel.txt	16	B1	L	v	spectral	0.988502293302311
gsx11_vowel.txt	17	B1	L	v	spectral	0.983088705853324
gsx11_vowel.txt	18	B1	L	v	spectral	NA
gsx11_vowel.txt	19	B1	L	v	spectral	1.02772938444567
gsx11_vowel.txt	20	B1	L	v	spectral	0.983431323633417
gsx11_vowel.txt	21	B2	L	v	spectral	1.00306459767619
gsx11_vowel.txt	22	B2	L	v	spectral	1.03507260254332
gsx11_vowel.txt	23	B2	L	v	spectral	1.05612490609272
gsx11_vowel.txt	24	B2	L	v	spectral	1.05624057340916
gsx11_vowel.txt	25	B2	L	v	spectral	0.989580687688681
gsx11_vowel.txt	26	B2	L	v	spectral	1.04764357299706
gsx11_vowel.txt	27	B2	L	v	spectral	1.0443095066998
gsx11_vowel.txt	28	B2	L	v	spectral	0.980395517971333
gsx11_vowel.txt	29	B2	L	v	spectral	0.989080401929429
gsx11_vowel.txt	30	B2	L	v	spectral	0.9733069942559
gsx11_vowel.txt	31	B2	L	v	spectral	0.967348097904433
gsx11_vowel.txt	32	B2	L	v	spectral	0.982760824803633
gsx11_vowel.txt	33	B2	L	v	spectral	0.988433416966089
gsx11_vowel.txt	34	B2	L	v	spectral	0.96445681940362
gsx11_vowel.txt	35	B2	L	v	spectral	0.949990283637286
gsx11_vowel.txt	36	B2	L	v	spectral	0.984679186925753
gsx11_vowel.txt	37	B2	L	v	spectral	0.911783051391484
gsx11_vowel.txt	38	B2	L	v	spectral	0.956773431358252
gsx11_vowel.txt	39	B2	L	v	spectral	0.944928837284679
gsx11_vowel.txt	40	B2	L	v	spectral	0.930191925524268
gsx11_vowel.txt	41	B3	L	v	spectral	NA
gsx11_vowel.txt	42	B3	L	v	spectral	0.904450430742977
gsx11_vowel.txt	43	B3	L	v	spectral	0.92817038233274
gsx11_vowel.txt	44	B3	L	v	spectral	0.93437597704466
gsx11_vowel.txt	45	B3	L	v	spectral	0.886523158789749
gsx11_vowel.txt	46	B3	L	v	spectral	0.902041677129979
gsx11_vowel.txt	47	B3	L	v	spectral	0.900867722845906
gsx11_vowel.txt	48	B3	L	v	spectral	0.896237663017655
gsx11_vowel.txt	49	B3	L	v	spectral	0.871571231812949
gsx11_vowel.txt	50	B3	L	v	spectral	0.851772314141614
gsx11_vowel.txt	51	B3	L	v	spectral	0.892810645762069
gsx11_vowel.txt	52	B3	L	v	spectral	0.901030821136439
gsx11_vowel.txt	53	B3	L	v	spectral	0.881274462347843
gsx11_vowel.txt	54	B3	L	v	spectral	0.92831360633055
gsx11_vowel.txt	55	B3	L	v	spectral	0.926854061294695
gsx11_vowel.txt	56	B3	L	v	spectral	0.879336020474134
gsx11_vowel.txt	57	B3	L	v	spectral	0.872508902115258
gsx11_vowel.txt	58	B3	L	v	spectral	NA
gsx11_vowel.txt	59	B3	L	v	spectral	0.900485448763138
gsx11_vowel.txt	60	B3	L	v	spectral	0.895713012383313
gsx11_vowel.txt	61	B4	L	v	spectral	NA
gsx11_vowel.txt	62	B4	L	v	spectral	0.903631267145942
gsx11_vowel.txt	63	B4	L	v	spectral	0.875942293949165
gsx11_vowel.txt	64	B4	L	v	spectral	0.912206537640281
gsx11_vowel.txt	65	B4	L	v	spectral	0.863462254477248
gsx11_vowel.txt	66	B4	L	v	spectral	0.928328492787976
gsx11_vowel.txt	67	B4	L	v	spectral	0.89521476384851
gsx11_vowel.txt	68	B4	L	v	spectral	0.935449502556753
gsx11_vowel.txt	69	B4	L	v	spectral	0.869310383388104
gsx11_vowel.txt	70	B4	L	v	spectral	0.911227293614223
gsx11_vowel.txt	71	B4	L	v	spectral	0.93936514256931
gsx11_vowel.txt	72	B4	L	v	spectral	0.945210903726612
gsx11_vowel.txt	73	B4	L	v	spectral	0.919792872167608
gsx11_vowel.txt	74	B4	L	v	spectral	0.913669478140776
gsx11_vowel.txt	75	B4	L	v	spectral	0.907870660998294
gsx11_vowel.txt	76	B4	L	v	spectral	0.903964012151691
gsx11_vowel.txt	77	B4	L	v	spectral	0.908633823677535
gsx11_vowel.txt	78	B4	L	v	spectral	0.914682727020858
gsx11_vowel.txt	79	B4	L	v	spectral	0.940194978872107
gsx11_vowel.txt	80	B4	L	v	spectral	0.954576911913365
gsx11_vowel.txt	81	B5	L	v	spectral	0.943667033181351
gsx11_vowel.txt	82	B5	L	v	spectral	0.830859488798888
gsx11_vowel.txt	83	B5	L	v	spectral	0.918147859929511
gsx11_vowel.txt	84	B5	L	v	spectral	0.912503354843339
gsx11_vowel.txt	85	B5	L	v	spectral	0.922127125772895
gsx11_vowel.txt	86	B5	L	v	spectral	0.915957571508538
gsx11_vowel.txt	87	B5	L	v	spectral	0.848552012638673
gsx11_vowel.txt	88	B5	L	v	spectral	0.889033584541946
gsx11_vowel.txt	89	B5	L	v	spectral	NA
gsx11_vowel.txt	90	B5	L	v	spectral	0.958273035831615
gsx11_vowel.txt	91	B5	L	v	spectral	0.894066992104356
gsx11_vowel.txt	92	B5	L	v	spectral	0.901642103037508
gsx11_vowel.txt	93	B5	L	v	spectral	0.899425562720157
gsx11_vowel.txt	94	B5	L	v	spectral	0.929611730382191
gsx11_vowel.txt	95	B5	L	v	spectral	0.931787709026319
gsx11_vowel.txt	96	B5	L	v	spectral	0.901570320721677
gsx11_vowel.txt	97	B5	L	v	spectral	0.916590677949455
gsx11_vowel.txt	98	B5	L	v	spectral	0.976012061814768
gsx11_vowel.txt	99	B5	L	v	spectral	0.889431519325126
gsx11_vowel.txt	100	B5	L	v	spectral	0.908186855083078
hhp03_vowel.txt	1	B1	0KG	v	spectral	NA
hhp03_vowel.txt	2	B1	0KG	v	spectral	1.00732515368809
hhp03_vowel.txt	3	B1	0KG	v	spectral	1.02373127953954
hhp03_vowel.txt	4	B1	0KG	v	spectral	0.986767683224445
hhp03_vowel.txt	5	B1	0KG	v	spectral	1.01898591874057
hhp03_vowel.txt	6	B1	0KG	v	spectral	1.0238219677128
hhp03_vowel.txt	7	B1	0KG	v	spectral	NA
hhp03_vowel.txt	8	B1	0KG	v	spectral	1.03371992460017
hhp03_vowel.txt	9	B1	0KG	v	spectral	1.04523023712115
hhp03_vowel.txt	10	B1	0KG	v	spectral	0.977676094427144
hhp03_vowel.txt	11	B1	0KG	v	spectral	0.991025221590986
hhp03_vowel.txt	12	B1	0KG	v	spectral	0.965643415154746
hhp03_vowel.txt	13	B1	0KG	v	spectral	0.978095444136751
hhp03_vowel.txt	14	B1	0KG	v	spectral	1.00258323901394
hhp03_vowel.txt	15	B1	0KG	v	spectral	0.993822269195096
hhp03_vowel.txt	16	B1	0KG	v	spectral	1.00704035507135
hhp03_vowel.txt	17	B1	0KG	v	spectral	0.962239241502988
hhp03_vowel.txt	18	B1	0KG	v	spectral	1.01361429691421
hhp03_vowel.txt	19	B1	0KG	v	spectral	0.995582687898611
hhp03_vowel.txt	20	B1	0KG	v	spectral	0.973095570467406
hhp03_vowel.txt	21	B2	0KG	v	spectral	0.974831172491612
hhp03_vowel.txt	22	B2	0KG	v	spectral	0.990148017135922
hhp03_vowel.txt	23	B2	0KG	v	spectral	0.971838213556882
hhp03_vowel.txt	24	B2	0KG	v	spectral	1.04508214548128
hhp03_vowel.txt	25	B2	0KG	v	spectral	0.968282365908784
hhp03_vowel.txt	26	B2	0KG	v	spectral	0.975799702678323
hhp03_vowel.txt	27	B2	0KG	v	spectral	0.968851141085899
hhp03_vowel.txt	28	B2	0KG	v	spectral	0.997484634762832
hhp03_vowel.txt	29	B2	0KG	v	spectral	1.00298228093417
hhp03_vowel.txt	30	B2	0KG	v	spectral	0.99277279272783
hhp03_vowel.txt	31	B2	0KG	v	spectral	0.997382021149881
hhp03_vowel.txt	32	B2	0KG	v	spectral	0.967416078759588
hhp03_vowel.txt	33	B2	0KG	v	spectral	0.973607971624043
hhp03_vowel.txt	34	B2	0KG	v	spectral	1.01477760427268
hhp03_vowel.txt	35	B2	0KG	v	spectral	1.0302680262581
hhp03_vowel.txt	36	B2	0KG	v	spectral	0.98599562014384
hhp03_vowel.txt	37	B2	0KG	v	spectral	1.0085746970439
hhp03_vowel.txt	38	B2	0KG	v	spectral	NA
hhp03_vowel.txt	39	B2	0KG	v	spectral	0.942620079823538
hhp03_vowel.txt	40	B2	0KG	v	spectral	0.947438758889594
hhp03_vowel.txt	41	B3	0KG	v	spectral	0.984538733507242
hhp03_vowel.txt	42	B3	0KG	v	spectral	1.00668879209494
hhp03_vowel.txt	43	B3	0KG	v	spectral	0.999207209496063
hhp03_vowel.txt	44	B3	0KG	v	spectral	0.962631163432532
hhp03_vowel.txt	45	B3	0KG	v	spectral	0.970843399918698
hhp03_vowel.txt	46	B3	0KG	v	spectral	0.973543399705782
hhp03_vowel.txt	47	B3	0KG	v	spectral	0.97770220983849
hhp03_vowel.txt	48	B3	0KG	v	spectral	0.942844777301785
hhp03_vowel.txt	49	B3	0KG	v	spectral	0.980438393747338
hhp03_vowel.txt	50	B3	0KG	v	spectral	0.978226300310232
hhp03_vowel.txt	51	B3	0KG	v	spectral	0.997299854062762
hhp03_vowel.txt	52	B3	0KG	v	spectral	1.04669146969323
hhp03_vowel.txt	53	B3	0KG	v	spectral	1.00968786733407
hhp03_vowel.txt	54	B3	0KG	v	spectral	1.03003913982285
hhp03_vowel.txt	55	B3	0KG	v	spectral	0.934768304565758
hhp03_vowel.txt	56	B3	0KG	v	spectral	0.97749749038659
hhp03_vowel.txt	57	B3	0KG	v	spectral	0.942587606046731
hhp03_vowel.txt	58	B3	0KG	v	spectral	0.961062675163938
hhp03_vowel.txt	59	B3	0KG	v	spectral	NA
hhp03_vowel.txt	60	B3	0KG	v	spectral	0.999255961763435
hhp03_vowel.txt	61	B4	0KG	v	spectral	0.964009397814011
hhp03_vowel.txt	62	B4	0KG	v	spectral	1.06642769090421
hhp03_vowel.txt	63	B4	0KG	v	spectral	0.997233191928218
hhp03_vowel.txt	64	B4	0KG	v	spectral	0.947200161375719
hhp03_vowel.txt	65	B4	0KG	v	spectral	NA
hhp03_vowel.txt	66	B4	0KG	v	spectral	1.0769317742579
hhp03_vowel.txt	67	B4	0KG	v	spectral	1.03473402840855
hhp03_vowel.txt	68	B4	0KG	v	spectral	NA
hhp03_vowel.txt	69	B4	0KG	v	spectral	0.983187716115858
hhp03_vowel.txt	70	B4	0KG	v	spectral	1.04992721734723
hhp03_vowel.txt	71	B4	0KG	v	spectral	0.979875075784722
hhp03_vowel.txt	72	B4	0KG	v	spectral	1.04308214319347
hhp03_vowel.txt	73	B4	0KG	v	spectral	1.05202442345534
hhp03_vowel.txt	74	B4	0KG	v	spectral	0.945478166515288
hhp03_vowel.txt	75	B4	0KG	v	spectral	0.99037615398734
hhp03_vowel.txt	76	B4	0KG	v	spectral	1.00563541766304
hhp03_vowel.txt	77	B4	0KG	v	spectral	0.976904354904555
hhp03_vowel.txt	78	B4	0KG	v	spectral	1.00101221524924
hhp03_vowel.txt	79	B4	0KG	v	spectral	0.994612138983882
hhp03_vowel.txt	80	B4	0KG	v	spectral	1.00902056082116
hhp03_vowel.txt	81	B5	0KG	v	spectral	1.05974406332656
hhp03_vowel.txt	82	B5	0KG	v	spectral	1.02493261066906
hhp03_vowel.txt	83	B5	0KG	v	spectral	1.01385573053582
hhp03_vowel.txt	84	B5	0KG	v	spectral	1.07850745642446
hhp03_vowel.txt	85	B5	0KG	v	spectral	1.11530624762831
hhp03_vowel.txt	86	B5	0KG	v	spectral	1.07390068094144
hhp03_vowel.txt	87	B5	0KG	v	spectral	1.01283085358496
hhp03_vowel.txt	88	B5	0KG	v	spectral	1.02852682426264
hhp03_vowel.txt	89	B5	0KG	v	spectral	1.06142683425488
hhp03_vowel.txt	90	B5	0KG	v	spectral	NA
hhp03_vowel.txt	91	B5	0KG	v	spectral	1.11007619682034
hhp03_vowel.txt	92	B5	0KG	v	spectral	1.06980760363695
hhp03_vowel.txt	93	B5	0KG	v	spectral	1.08715158631881
hhp03_vowel.txt	94	B5	0KG	v	spectral	0.945041211975886
hhp03_vowel.txt	95	B5	0KG	v	spectral	1.06720583766001
hhp03_vowel.txt	96	B5	0KG	v	spectral	1.02869988201112
hhp03_vowel.txt	97	B5	0KG	v	spectral	1.11096309119772
hhp03_vowel.txt	98	B5	0KG	v	spectral	1.05018501525805
hhp03_vowel.txt	99	B5	0KG	v	spectral	1.00126872277176
hhp03_vowel.txt	100	B5	0KG	v	spectral	NA
hhp03_vowel.txt	1	B1	B	v	spectral	0.964848193382847
hhp03_vowel.txt	2	B1	B	v	spectral	0.977088984362946
hhp03_vowel.txt	3	B1	B	v	spectral	0.983264945252679
hhp03_vowel.txt	4	B1	B	v	spectral	1.01237558065357
hhp03_vowel.txt	5	B1	B	v	spectral	0.999256475609175
hhp03_vowel.txt	6	B1	B	v	spectral	0.975823695402365
hhp03_vowel.txt	7	B1	B	v	spectral	0.969707510758674
hhp03_vowel.txt	8	B1	B	v	spectral	1.02241051020772
hhp03_vowel.txt	9	B1	B	v	spectral	1.04246502483321
hhp03_vowel.txt	10	B1	B	v	spectral	1.01176904067525
hhp03_vowel.txt	11	B1	B	v	spectral	1.02716538251961
hhp03_vowel.txt	12	B1	B	v	spectral	0.991268291236519
hhp03_vowel.txt	13	B1	B	v	spectral	NA
hhp03_vowel.txt	14	B1	B	v	spectral	NA
hhp03_vowel.txt	15	B1	B	v	spectral	0.995821663415929
hhp03_vowel.txt	16	B1	B	v	spectral	1.02641940671429
hhp03_vowel.txt	17	B1	B	v	spectral	1.0290413167084
hhp03_vowel.txt	18	B1	B	v	spectral	0.989761071518453
hhp03_vowel.txt	19	B1	B	v	spectral	0.991509662475937
hhp03_vowel.txt	20	B1	B	v	spectral	0.99000324427242
hhp03_vowel.txt	21	B2	B	v	spectral	1.03624287533003
hhp03_vowel.txt	22	B2	B	v	spectral	0.977270627517045
hhp03_vowel.txt	23	B2	B	v	spectral	0.942978132702106
hhp03_vowel.txt	24	B2	B	v	spectral	NA
hhp03_vowel.txt	25	B2	B	v	spectral	0.977417034754756
hhp03_vowel.txt	26	B2	B	v	spectral	0.934485351081848
hhp03_vowel.txt	27	B2	B	v	spectral	1.01293150901591
hhp03_vowel.txt	28	B2	B	v	spectral	0.964752875371102
hhp03_vowel.txt	29	B2	B	v	spectral	0.975756349424422
hhp03_vowel.txt	30	B2	B	v	spectral	0.980983417143478
hhp03_vowel.txt	31	B2	B	v	spectral	0.959647295138981
hhp03_vowel.txt	32	B2	B	v	spectral	0.933094790771236
hhp03_vowel.txt	33	B2	B	v	spectral	0.985876826482241
hhp03_vowel.txt	34	B2	B	v	spectral	0.933827545594809
hhp03_vowel.txt	35	B2	B	v	spectral	1.04430769898164
hhp03_vowel.txt	36	B2	B	v	spectral	0.956552085377712
hhp03_vowel.txt	37	B2	B	v	spectral	0.94621603796002
hhp03_vowel.txt	38	B2	B	v	spectral	0.962350781927462
hhp03_vowel.txt	39	B2	B	v	spectral	1.00060642092111
hhp03_vowel.txt	40	B2	B	v	spectral	1.01975068699147
hhp03_vowel.txt	41	B3	B	v	spectral	0.927422348540309
hhp03_vowel.txt	42	B3	B	v	spectral	1.0101028536952
hhp03_vowel.txt	43	B3	B	v	spectral	0.874368710267646
hhp03_vowel.txt	44	B3	B	v	spectral	0.913626423421517
hhp03_vowel.txt	45	B3	B	v	spectral	1.02070194633346
hhp03_vowel.txt	46	B3	B	v	spectral	0.92360275681936
hhp03_vowel.txt	47	B3	B	v	spectral	0.930543241687062
hhp03_vowel.txt	48	B3	B	v	spectral	0.974612653006539
hhp03_vowel.txt	49	B3	B	v	spectral	0.900073381714866
hhp03_vowel.txt	50	B3	B	v	spectral	0.982560681589633
hhp03_vowel.txt	51	B3	B	v	spectral	0.974598169235568
hhp03_vowel.txt	52	B3	B	v	spectral	0.92464617436767
hhp03_vowel.txt	53	B3	B	v	spectral	NA
hhp03_vowel.txt	54	B3	B	v	spectral	0.945831960785946
hhp03_vowel.txt	55	B3	B	v	spectral	0.988472298830465
hhp03_vowel.txt	56	B3	B	v	spectral	1.00211705390847
hhp03_vowel.txt	57	B3	B	v	spectral	0.915324710019798
hhp03_vowel.txt	58	B3	B	v	spectral	0.951418151968633
hhp03_vowel.txt	59	B3	B	v	spectral	0.96182705544288
hhp03_vowel.txt	60	B3	B	v	spectral	1.00839639966971
hhp03_vowel.txt	61	B4	B	v	spectral	0.931304075755258
hhp03_vowel.txt	62	B4	B	v	spectral	0.999132864128275
hhp03_vowel.txt	63	B4	B	v	spectral	0.935696064640346
hhp03_vowel.txt	64	B4	B	v	spectral	0.918348593548742
hhp03_vowel.txt	65	B4	B	v	spectral	0.989290658615346
hhp03_vowel.txt	66	B4	B	v	spectral	0.932289274585774
hhp03_vowel.txt	67	B4	B	v	spectral	0.913291938821953
hhp03_vowel.txt	68	B4	B	v	spectral	0.847569300082565
hhp03_vowel.txt	69	B4	B	v	spectral	NA
hhp03_vowel.txt	70	B4	B	v	spectral	0.977420097319506
hhp03_vowel.txt	71	B4	B	v	spectral	0.917040567612414
hhp03_vowel.txt	72	B4	B	v	spectral	0.923185660449452
hhp03_vowel.txt	73	B4	B	v	spectral	0.940957155274245
hhp03_vowel.txt	74	B4	B	v	spectral	0.828330761280628
hhp03_vowel.txt	75	B4	B	v	spectral	0.930677003704703
hhp03_vowel.txt	76	B4	B	v	spectral	0.902452691265393
hhp03_vowel.txt	77	B4	B	v	spectral	0.99672354657099
hhp03_vowel.txt	78	B4	B	v	spectral	0.974149240638867
hhp03_vowel.txt	79	B4	B	v	spectral	0.934877451727848
hhp03_vowel.txt	80	B4	B	v	spectral	0.867705901470741
hhp03_vowel.txt	81	B5	B	v	spectral	1.00634516610106
hhp03_vowel.txt	82	B5	B	v	spectral	0.967892165548253
hhp03_vowel.txt	83	B5	B	v	spectral	0.918620861779168
hhp03_vowel.txt	84	B5	B	v	spectral	1.09450033349989
hhp03_vowel.txt	85	B5	B	v	spectral	1.00739419474016
hhp03_vowel.txt	86	B5	B	v	spectral	1.02018443616439
hhp03_vowel.txt	87	B5	B	v	spectral	1.04058387099651
hhp03_vowel.txt	88	B5	B	v	spectral	0.921285398862072
hhp03_vowel.txt	89	B5	B	v	spectral	1.07182907589409
hhp03_vowel.txt	90	B5	B	v	spectral	0.960032198452097
hhp03_vowel.txt	91	B5	B	v	spectral	1.02031369864563
hhp03_vowel.txt	92	B5	B	v	spectral	0.999100285979413
hhp03_vowel.txt	93	B5	B	v	spectral	0.971830260944347
hhp03_vowel.txt	94	B5	B	v	spectral	0.904151036376458
hhp03_vowel.txt	95	B5	B	v	spectral	1.05778982922692
hhp03_vowel.txt	96	B5	B	v	spectral	0.93812225721981
hhp03_vowel.txt	97	B5	B	v	spectral	0.883696212212516
hhp03_vowel.txt	98	B5	B	v	spectral	NA
hhp03_vowel.txt	99	B5	B	v	spectral	1.01908571021765
hhp03_vowel.txt	100	B5	B	v	spectral	1.00397040461056
hhp03_vowel.txt	1	B1	R	v	spectral	1.03209134243448
hhp03_vowel.txt	2	B1	R	v	spectral	1.02536577541128
hhp03_vowel.txt	3	B1	R	v	spectral	1.00123789228614
hhp03_vowel.txt	4	B1	R	v	spectral	0.957529664896529
hhp03_vowel.txt	5	B1	R	v	spectral	0.998128900154033
hhp03_vowel.txt	6	B1	R	v	spectral	0.993576441794594
hhp03_vowel.txt	7	B1	R	v	spectral	0.956427429804409
hhp03_vowel.txt	8	B1	R	v	spectral	0.984420756797049
hhp03_vowel.txt	9	B1	R	v	spectral	1.00652652278361
hhp03_vowel.txt	10	B1	R	v	spectral	1.01277406238037
hhp03_vowel.txt	11	B1	R	v	spectral	1.03668119308877
hhp03_vowel.txt	12	B1	R	v	spectral	1.01354867447101
hhp03_vowel.txt	13	B1	R	v	spectral	1.02245156870448
hhp03_vowel.txt	14	B1	R	v	spectral	0.984109808573105
hhp03_vowel.txt	15	B1	R	v	spectral	0.981751926981012
hhp03_vowel.txt	16	B1	R	v	spectral	1.00507644240267
hhp03_vowel.txt	17	B1	R	v	spectral	0.998826703372942
hhp03_vowel.txt	18	B1	R	v	spectral	0.954515510263645
hhp03_vowel.txt	19	B1	R	v	spectral	1.03276509031342
hhp03_vowel.txt	20	B1	R	v	spectral	1.00219429308644
hhp03_vowel.txt	21	B2	R	v	spectral	1.02356540306748
hhp03_vowel.txt	22	B2	R	v	spectral	NA
hhp03_vowel.txt	23	B2	R	v	spectral	1.01358400613235
hhp03_vowel.txt	24	B2	R	v	spectral	0.996586206239259
hhp03_vowel.txt	25	B2	R	v	spectral	0.992661153561533
hhp03_vowel.txt	26	B2	R	v	spectral	0.941725188848986
hhp03_vowel.txt	27	B2	R	v	spectral	0.920712211954481
hhp03_vowel.txt	28	B2	R	v	spectral	0.993957113162204
hhp03_vowel.txt	29	B2	R	v	spectral	0.982745961749386
hhp03_vowel.txt	30	B2	R	v	spectral	0.948696969832579
hhp03_vowel.txt	31	B2	R	v	spectral	1.01773422826355
hhp03_vowel.txt	32	B2	R	v	spectral	0.974300374413
hhp03_vowel.txt	33	B2	R	v	spectral	1.02376090708532
hhp03_vowel.txt	34	B2	R	v	spectral	1.00627690482998
hhp03_vowel.txt	35	B2	R	v	spectral	1.03755658314223
hhp03_vowel.txt	36	B2	R	v	spectral	1.02912790906356
hhp03_vowel.txt	37	B2	R	v	spectral	0.950931150672762
hhp03_vowel.txt	38	B2	R	v	spectral	0.966283399768106
hhp03_vowel.txt	39	B2	R	v	spectral	0.978622096552141
hhp03_vowel.txt	40	B2	R	v	spectral	0.951728174723725
hhp03_vowel.txt	41	B3	R	v	spectral	1.00108785998239
hhp03_vowel.txt	42	B3	R	v	spectral	NA
hhp03_vowel.txt	43	B3	R	v	spectral	0.947646378676495
hhp03_vowel.txt	44	B3	R	v	spectral	0.977524371759751
hhp03_vowel.txt	45	B3	R	v	spectral	0.971329834338395
hhp03_vowel.txt	46	B3	R	v	spectral	0.961148806760611
hhp03_vowel.txt	47	B3	R	v	spectral	0.988361241228934
hhp03_vowel.txt	48	B3	R	v	spectral	1.00210836369669
hhp03_vowel.txt	49	B3	R	v	spectral	0.970284239195612
hhp03_vowel.txt	50	B3	R	v	spectral	0.90357224765695
hhp03_vowel.txt	51	B3	R	v	spectral	1.00265320815545
hhp03_vowel.txt	52	B3	R	v	spectral	0.882851610335984
hhp03_vowel.txt	53	B3	R	v	spectral	0.964555130490357
hhp03_vowel.txt	54	B3	R	v	spectral	1.01334202646297
hhp03_vowel.txt	55	B3	R	v	spectral	0.991391767505814
hhp03_vowel.txt	56	B3	R	v	spectral	0.939992003645935
hhp03_vowel.txt	57	B3	R	v	spectral	0.991091722850947
hhp03_vowel.txt	58	B3	R	v	spectral	0.9472183387695
hhp03_vowel.txt	59	B3	R	v	spectral	0.93480546457517
hhp03_vowel.txt	60	B3	R	v	spectral	0.962634599780908
hhp03_vowel.txt	61	B4	R	v	spectral	0.992894151470765
hhp03_vowel.txt	62	B4	R	v	spectral	0.941752464359031
hhp03_vowel.txt	63	B4	R	v	spectral	1.03524797781431
hhp03_vowel.txt	64	B4	R	v	spectral	0.95319675358519
hhp03_vowel.txt	65	B4	R	v	spectral	0.992888719948365
hhp03_vowel.txt	66	B4	R	v	spectral	0.925993431326002
hhp03_vowel.txt	67	B4	R	v	spectral	0.965339826445447
hhp03_vowel.txt	68	B4	R	v	spectral	0.946227749208611
hhp03_vowel.txt	69	B4	R	v	spectral	NA
hhp03_vowel.txt	70	B4	R	v	spectral	NA
hhp03_vowel.txt	71	B4	R	v	spectral	0.918358984925075
hhp03_vowel.txt	72	B4	R	v	spectral	0.895147869151908
hhp03_vowel.txt	73	B4	R	v	spectral	0.967921200108405
hhp03_vowel.txt	74	B4	R	v	spectral	0.958666161690067
hhp03_vowel.txt	75	B4	R	v	spectral	1.00081629701712
hhp03_vowel.txt	76	B4	R	v	spectral	0.951836132524438
hhp03_vowel.txt	77	B4	R	v	spectral	0.951370497040996
hhp03_vowel.txt	78	B4	R	v	spectral	1.03893761770625
hhp03_vowel.txt	79	B4	R	v	spectral	0.961575123424637
hhp03_vowel.txt	80	B4	R	v	spectral	0.942060955879515
hhp03_vowel.txt	81	B5	R	v	spectral	1.0004872468818
hhp03_vowel.txt	82	B5	R	v	spectral	0.969736217192191
hhp03_vowel.txt	83	B5	R	v	spectral	0.972709557969026
hhp03_vowel.txt	84	B5	R	v	spectral	1.04086434374678
hhp03_vowel.txt	85	B5	R	v	spectral	1.01271344443572
hhp03_vowel.txt	86	B5	R	v	spectral	0.918643832394258
hhp03_vowel.txt	87	B5	R	v	spectral	1.01200769414726
hhp03_vowel.txt	88	B5	R	v	spectral	0.990520660414044
hhp03_vowel.txt	89	B5	R	v	spectral	1.03163712558369
hhp03_vowel.txt	90	B5	R	v	spectral	0.950966558443302
hhp03_vowel.txt	91	B5	R	v	spectral	1.00938412284167
hhp03_vowel.txt	92	B5	R	v	spectral	1.03753314373818
hhp03_vowel.txt	93	B5	R	v	spectral	0.961149447158065
hhp03_vowel.txt	94	B5	R	v	spectral	1.08209080976292
hhp03_vowel.txt	95	B5	R	v	spectral	0.998806702494783
hhp03_vowel.txt	96	B5	R	v	spectral	1.10059580998943
hhp03_vowel.txt	97	B5	R	v	spectral	0.96619287919827
hhp03_vowel.txt	98	B5	R	v	spectral	1.08225637307656
hhp03_vowel.txt	99	B5	R	v	spectral	NA
hhp03_vowel.txt	100	B5	R	v	spectral	0.998101629696239
hhp03_vowel.txt	1	B1	L	v	spectral	0.967056030907288
hhp03_vowel.txt	2	B1	L	v	spectral	1.01189671468477
hhp03_vowel.txt	3	B1	L	v	spectral	1.00904604679794
hhp03_vowel.txt	4	B1	L	v	spectral	0.980722733007138
hhp03_vowel.txt	5	B1	L	v	spectral	1.01502485251183
hhp03_vowel.txt	6	B1	L	v	spectral	0.99693955676943
hhp03_vowel.txt	7	B1	L	v	spectral	1.01686063603627
hhp03_vowel.txt	8	B1	L	v	spectral	0.986165543036646
hhp03_vowel.txt	9	B1	L	v	spectral	1.04338695877271
hhp03_vowel.txt	10	B1	L	v	spectral	NA
hhp03_vowel.txt	11	B1	L	v	spectral	0.988747714560952
hhp03_vowel.txt	12	B1	L	v	spectral	1.0395898381974
hhp03_vowel.txt	13	B1	L	v	spectral	1.02865827933301
hhp03_vowel.txt	14	B1	L	v	spectral	1.0220041225585
hhp03_vowel.txt	15	B1	L	v	spectral	1.02643853822147
hhp03_vowel.txt	16	B1	L	v	spectral	1.00033309401337
hhp03_vowel.txt	17	B1	L	v	spectral	0.947379082945748
hhp03_vowel.txt	18	B1	L	v	spectral	0.975497353606558
hhp03_vowel.txt	19	B1	L	v	spectral	0.944252904038978
hhp03_vowel.txt	20	B1	L	v	spectral	NA
hhp03_vowel.txt	21	B2	L	v	spectral	1.00856434211072
hhp03_vowel.txt	22	B2	L	v	spectral	0.977181803414042
hhp03_vowel.txt	23	B2	L	v	spectral	0.921741887577887
hhp03_vowel.txt	24	B2	L	v	spectral	0.930213320352663
hhp03_vowel.txt	25	B2	L	v	spectral	0.98757943291436
hhp03_vowel.txt	26	B2	L	v	spectral	0.993140952140137
hhp03_vowel.txt	27	B2	L	v	spectral	0.970103193756156
hhp03_vowel.txt	28	B2	L	v	spectral	0.957318885171335
hhp03_vowel.txt	29	B2	L	v	spectral	0.921979033722525
hhp03_vowel.txt	30	B2	L	v	spectral	1.01995034280383
hhp03_vowel.txt	31	B2	L	v	spectral	1.05281074060499
hhp03_vowel.txt	32	B2	L	v	spectral	0.941645813080954
hhp03_vowel.txt	33	B2	L	v	spectral	0.948965220864171
hhp03_vowel.txt	34	B2	L	v	spectral	NA
hhp03_vowel.txt	35	B2	L	v	spectral	0.992890418548316
hhp03_vowel.txt	36	B2	L	v	spectral	0.980465643883605
hhp03_vowel.txt	37	B2	L	v	spectral	0.987456805631699
hhp03_vowel.txt	38	B2	L	v	spectral	1.01268729167887
hhp03_vowel.txt	39	B2	L	v	spectral	0.894813849735748
hhp03_vowel.txt	40	B2	L	v	spectral	0.966861423155643
hhp03_vowel.txt	41	B3	L	v	spectral	1.00011786474049
hhp03_vowel.txt	42	B3	L	v	spectral	0.922274541556768
hhp03_vowel.txt	43	B3	L	v	spectral	0.975296423959921
hhp03_vowel.txt	44	B3	L	v	spectral	0.970281183374646
hhp03_vowel.txt	45	B3	L	v	spectral	0.953577551130661
hhp03_vowel.txt	46	B3	L	v	spectral	0.935496532291678
hhp03_vowel.txt	47	B3	L	v	spectral	0.993075751419806
hhp03_vowel.txt	48	B3	L	v	spectral	0.936838658419124
hhp03_vowel.txt	49	B3	L	v	spectral	0.976705437014727
hhp03_vowel.txt	50	B3	L	v	spectral	0.986250228211346
hhp03_vowel.txt	51	B3	L	v	spectral	0.900504672944489
hhp03_vowel.txt	52	B3	L	v	spectral	0.932029171837308
hhp03_vowel.txt	53	B3	L	v	spectral	NA
hhp03_vowel.txt	54	B3	L	v	spectral	0.954502201936929
hhp03_vowel.txt	55	B3	L	v	spectral	0.946832164839853
hhp03_vowel.txt	56	B3	L	v	spectral	0.978238373685194
hhp03_vowel.txt	57	B3	L	v	spectral	0.942316836481532
hhp03_vowel.txt	58	B3	L	v	spectral	0.973290039501659
hhp03_vowel.txt	59	B3	L	v	spectral	0.920678521077149
hhp03_vowel.txt	60	B3	L	v	spectral	NA
hhp03_vowel.txt	61	B4	L	v	spectral	0.964339292986917
hhp03_vowel.txt	62	B4	L	v	spectral	0.982291547493032
hhp03_vowel.txt	63	B4	L	v	spectral	0.930352842564491
hhp03_vowel.txt	64	B4	L	v	spectral	1.01572799123066
hhp03_vowel.txt	65	B4	L	v	spectral	0.90753675551311
hhp03_vowel.txt	66	B4	L	v	spectral	0.967710877925508
hhp03_vowel.txt	67	B4	L	v	spectral	0.961413369096711
hhp03_vowel.txt	68	B4	L	v	spectral	NA
hhp03_vowel.txt	69	B4	L	v	spectral	0.975440255286457
hhp03_vowel.txt	70	B4	L	v	spectral	0.957666047786962
hhp03_vowel.txt	71	B4	L	v	spectral	0.989722159499893
hhp03_vowel.txt	72	B4	L	v	spectral	0.947840431545803
hhp03_vowel.txt	73	B4	L	v	spectral	0.91098829327138
hhp03_vowel.txt	74	B4	L	v	spectral	0.967029485957193
hhp03_vowel.txt	75	B4	L	v	spectral	0.95137386627746
hhp03_vowel.txt	76	B4	L	v	spectral	1.00381473654481
hhp03_vowel.txt	77	B4	L	v	spectral	0.968313593708217
hhp03_vowel.txt	78	B4	L	v	spectral	0.970651428747556
hhp03_vowel.txt	80	B4	L	v	spectral	0.991663660212632
hhp03_vowel.txt	81	B5	L	v	spectral	0.912108450721307
hhp03_vowel.txt	82	B5	L	v	spectral	0.950077135805244
hhp03_vowel.txt	83	B5	L	v	spectral	1.02904693765763
hhp03_vowel.txt	84	B5	L	v	spectral	0.927100644534965
hhp03_vowel.txt	85	B5	L	v	spectral	1.02470489506399
hhp03_vowel.txt	86	B5	L	v	spectral	1.01850930145172
hhp03_vowel.txt	87	B5	L	v	spectral	1.03384718845157
hhp03_vowel.txt	88	B5	L	v	spectral	1.01308401015899
hhp03_vowel.txt	89	B5	L	v	spectral	0.961680161568936
hhp03_vowel.txt	90	B5	L	v	spectral	0.993200619494668
hhp03_vowel.txt	91	B5	L	v	spectral	1.052660391456
hhp03_vowel.txt	92	B5	L	v	spectral	1.01529478141291
hhp03_vowel.txt	93	B5	L	v	spectral	1.01455477769234
hhp03_vowel.txt	94	B5	L	v	spectral	0.982492556514879
hhp03_vowel.txt	95	B5	L	v	spectral	0.961921915566318
hhp03_vowel.txt	96	B5	L	v	spectral	1.05416734029171
hhp03_vowel.txt	97	B5	L	v	spectral	0.964625435557533
hhp03_vowel.txt	98	B5	L	v	spectral	1.0696299304491
hhp03_vowel.txt	99	B5	L	v	spectral	0.963826404148893
hhp03_vowel.txt	100	B5	L	v	spectral	1.02628350089684
kmb11_vowel.txt	1	B1	0KG	v	spectral	1.01241700927221
kmb11_vowel.txt	2	B1	0KG	v	spectral	0.972192937396591
kmb11_vowel.txt	3	B1	0KG	v	spectral	1.04368533020825
kmb11_vowel.txt	4	B1	0KG	v	spectral	NA
kmb11_vowel.txt	5	B1	0KG	v	spectral	1.05511722162932
kmb11_vowel.txt	6	B1	0KG	v	spectral	1.03713487713853
kmb11_vowel.txt	7	B1	0KG	v	spectral	0.945857579729775
kmb11_vowel.txt	8	B1	0KG	v	spectral	0.990114322977344
kmb11_vowel.txt	9	B1	0KG	v	spectral	0.977117120287772
kmb11_vowel.txt	10	B1	0KG	v	spectral	1.0013675739718
kmb11_vowel.txt	11	B1	0KG	v	spectral	0.98890950515621
kmb11_vowel.txt	12	B1	0KG	v	spectral	0.961021735814296
kmb11_vowel.txt	13	B1	0KG	v	spectral	0.975276701059773
kmb11_vowel.txt	14	B1	0KG	v	spectral	0.985017656190666
kmb11_vowel.txt	15	B1	0KG	v	spectral	1.01268847690629
kmb11_vowel.txt	16	B1	0KG	v	spectral	1.0052388988155
kmb11_vowel.txt	17	B1	0KG	v	spectral	1.05520551393152
kmb11_vowel.txt	18	B1	0KG	v	spectral	0.98384118453886
kmb11_vowel.txt	19	B1	0KG	v	spectral	1.00722003470948
kmb11_vowel.txt	20	B1	0KG	v	spectral	0.990576320265799
kmb11_vowel.txt	21	B2	0KG	v	spectral	1.03289994816736
kmb11_vowel.txt	22	B2	0KG	v	spectral	0.920946100501202
kmb11_vowel.txt	23	B2	0KG	v	spectral	0.985341990023395
kmb11_vowel.txt	24	B2	0KG	v	spectral	1.02623126935351
kmb11_vowel.txt	25	B2	0KG	v	spectral	0.973199261148897
kmb11_vowel.txt	26	B2	0KG	v	spectral	1.0328291402891
kmb11_vowel.txt	27	B2	0KG	v	spectral	0.926054415562708
kmb11_vowel.txt	28	B2	0KG	v	spectral	0.930945098171775
kmb11_vowel.txt	29	B2	0KG	v	spectral	0.920727940239758
kmb11_vowel.txt	30	B2	0KG	v	spectral	0.96587093214524
kmb11_vowel.txt	31	B2	0KG	v	spectral	0.989407429315496
kmb11_vowel.txt	32	B2	0KG	v	spectral	1.01188276543815
kmb11_vowel.txt	33	B2	0KG	v	spectral	0.978895223080382
kmb11_vowel.txt	34	B2	0KG	v	spectral	0.972460293612896
kmb11_vowel.txt	35	B2	0KG	v	spectral	1.0079153843171
kmb11_vowel.txt	36	B2	0KG	v	spectral	0.996592871208799
kmb11_vowel.txt	37	B2	0KG	v	spectral	1.01829364779194
kmb11_vowel.txt	38	B2	0KG	v	spectral	0.972661891662781
kmb11_vowel.txt	39	B2	0KG	v	spectral	1.00043162168905
kmb11_vowel.txt	40	B2	0KG	v	spectral	0.981899067086249
kmb11_vowel.txt	41	B3	0KG	v	spectral	1.0091517738757
kmb11_vowel.txt	42	B3	0KG	v	spectral	0.969710722362823
kmb11_vowel.txt	43	B3	0KG	v	spectral	1.00426156429881
kmb11_vowel.txt	44	B3	0KG	v	spectral	1.03147451660189
kmb11_vowel.txt	45	B3	0KG	v	spectral	1.05574604255837
kmb11_vowel.txt	46	B3	0KG	v	spectral	1.03713894042335
kmb11_vowel.txt	47	B3	0KG	v	spectral	1.02930141625511
kmb11_vowel.txt	48	B3	0KG	v	spectral	0.986101100956912
kmb11_vowel.txt	49	B3	0KG	v	spectral	1.02814710866149
kmb11_vowel.txt	50	B3	0KG	v	spectral	0.968766811631357
kmb11_vowel.txt	51	B3	0KG	v	spectral	1.0410913954429
kmb11_vowel.txt	52	B3	0KG	v	spectral	1.02560830111041
kmb11_vowel.txt	53	B3	0KG	v	spectral	0.97955985615113
kmb11_vowel.txt	54	B3	0KG	v	spectral	1.00308695318325
kmb11_vowel.txt	55	B3	0KG	v	spectral	1.02518852635861
kmb11_vowel.txt	56	B3	0KG	v	spectral	1.01119300663489
kmb11_vowel.txt	57	B3	0KG	v	spectral	NA
kmb11_vowel.txt	58	B3	0KG	v	spectral	0.964835291049038
kmb11_vowel.txt	59	B3	0KG	v	spectral	0.992586741068651
kmb11_vowel.txt	60	B3	0KG	v	spectral	0.967765181670036
kmb11_vowel.txt	61	B4	0KG	v	spectral	0.994937713519887
kmb11_vowel.txt	62	B4	0KG	v	spectral	0.967935640721957
kmb11_vowel.txt	63	B4	0KG	v	spectral	1.00918522873728
kmb11_vowel.txt	64	B4	0KG	v	spectral	1.01391836965358
kmb11_vowel.txt	65	B4	0KG	v	spectral	1.00273675248751
kmb11_vowel.txt	66	B4	0KG	v	spectral	1.00797030579267
kmb11_vowel.txt	67	B4	0KG	v	spectral	1.03685948935529
kmb11_vowel.txt	68	B4	0KG	v	spectral	1.01424257473124
kmb11_vowel.txt	69	B4	0KG	v	spectral	0.982090926392703
kmb11_vowel.txt	70	B4	0KG	v	spectral	0.977447559569252
kmb11_vowel.txt	71	B4	0KG	v	spectral	1.03991634326496
kmb11_vowel.txt	72	B4	0KG	v	spectral	1.07461669759888
kmb11_vowel.txt	73	B4	0KG	v	spectral	0.97009207306191
kmb11_vowel.txt	74	B4	0KG	v	spectral	1.05344028897879
kmb11_vowel.txt	75	B4	0KG	v	spectral	1.05507333028906
kmb11_vowel.txt	76	B4	0KG	v	spectral	0.948401961239107
kmb11_vowel.txt	77	B4	0KG	v	spectral	0.932413811134216
kmb11_vowel.txt	78	B4	0KG	v	spectral	0.974636770427179
kmb11_vowel.txt	79	B4	0KG	v	spectral	1.03507054130178
kmb11_vowel.txt	80	B4	0KG	v	spectral	0.973657524104201
kmb11_vowel.txt	81	B5	0KG	v	spectral	0.99061414871238
kmb11_vowel.txt	82	B5	0KG	v	spectral	0.989518272242863
kmb11_vowel.txt	83	B5	0KG	v	spectral	0.965199643553169
kmb11_vowel.txt	84	B5	0KG	v	spectral	0.973555461478258
kmb11_vowel.txt	85	B5	0KG	v	spectral	0.958915652255626
kmb11_vowel.txt	86	B5	0KG	v	spectral	NA
kmb11_vowel.txt	87	B5	0KG	v	spectral	0.962663877207796
kmb11_vowel.txt	88	B5	0KG	v	spectral	0.992343062524288
kmb11_vowel.txt	89	B5	0KG	v	spectral	0.987090926937268
kmb11_vowel.txt	90	B5	0KG	v	spectral	0.952420769682876
kmb11_vowel.txt	91	B5	0KG	v	spectral	0.936598638350205
kmb11_vowel.txt	92	B5	0KG	v	spectral	0.966267124790477
kmb11_vowel.txt	93	B5	0KG	v	spectral	0.986860867113151
kmb11_vowel.txt	94	B5	0KG	v	spectral	1.01021833716983
kmb11_vowel.txt	95	B5	0KG	v	spectral	1.01441933817334
kmb11_vowel.txt	96	B5	0KG	v	spectral	0.997154665801097
kmb11_vowel.txt	97	B5	0KG	v	spectral	1.00389353431868
kmb11_vowel.txt	98	B5	0KG	v	spectral	1.05978586456258
kmb11_vowel.txt	99	B5	0KG	v	spectral	1.03360708793946
kmb11_vowel.txt	100	B5	0KG	v	spectral	1.00644157994001
kmb11_vowel.txt	1	B1	B	v	spectral	0.984425096251745
kmb11_vowel.txt	2	B1	B	v	spectral	0.995014070220343
kmb11_vowel.txt	3	B1	B	v	spectral	0.964255379786658
kmb11_vowel.txt	4	B1	B	v	spectral	NA
kmb11_vowel.txt	5	B1	B	v	spectral	1.02538759011704
kmb11_vowel.txt	6	B1	B	v	spectral	0.997248444781113
kmb11_vowel.txt	7	B1	B	v	spectral	0.99847872585675
kmb11_vowel.txt	8	B1	B	v	spectral	0.993535687106692
kmb11_vowel.txt	9	B1	B	v	spectral	1.03038285710978
kmb11_vowel.txt	10	B1	B	v	spectral	1.02621530671827
kmb11_vowel.txt	11	B1	B	v	spectral	1.03676336153119
kmb11_vowel.txt	12	B1	B	v	spectral	0.988721700184895
kmb11_vowel.txt	13	B1	B	v	spectral	0.97950811080979
kmb11_vowel.txt	14	B1	B	v	spectral	0.956149938164307
kmb11_vowel.txt	15	B1	B	v	spectral	NA
kmb11_vowel.txt	16	B1	B	v	spectral	1.02032759883506
kmb11_vowel.txt	17	B1	B	v	spectral	1.02651197514754
kmb11_vowel.txt	18	B1	B	v	spectral	1.00925407613217
kmb11_vowel.txt	19	B1	B	v	spectral	0.97431518984073
kmb11_vowel.txt	20	B1	B	v	spectral	0.993504891405931
kmb11_vowel.txt	21	B2	B	v	spectral	0.99057918775909
kmb11_vowel.txt	22	B2	B	v	spectral	1.00458796157662
kmb11_vowel.txt	23	B2	B	v	spectral	0.974122826571003
kmb11_vowel.txt	24	B2	B	v	spectral	0.955780321832054
kmb11_vowel.txt	25	B2	B	v	spectral	1.01647909574783
kmb11_vowel.txt	26	B2	B	v	spectral	1.02251463688852
kmb11_vowel.txt	27	B2	B	v	spectral	1.03719262074842
kmb11_vowel.txt	28	B2	B	v	spectral	0.995297611479327
kmb11_vowel.txt	29	B2	B	v	spectral	0.997699942029447
kmb11_vowel.txt	30	B2	B	v	spectral	0.988165592543553
kmb11_vowel.txt	31	B2	B	v	spectral	1.00832648256023
kmb11_vowel.txt	32	B2	B	v	spectral	0.944383777375886
kmb11_vowel.txt	33	B2	B	v	spectral	0.984054039950497
kmb11_vowel.txt	34	B2	B	v	spectral	0.967837819539443
kmb11_vowel.txt	35	B2	B	v	spectral	1.03687590926105
kmb11_vowel.txt	36	B2	B	v	spectral	0.94238464277815
kmb11_vowel.txt	37	B2	B	v	spectral	NA
kmb11_vowel.txt	38	B2	B	v	spectral	0.980403280545201
kmb11_vowel.txt	39	B2	B	v	spectral	0.990689929053073
kmb11_vowel.txt	40	B2	B	v	spectral	1.03196825761956
kmb11_vowel.txt	41	B3	B	v	spectral	1.00294135138828
kmb11_vowel.txt	42	B3	B	v	spectral	1.02027458563336
kmb11_vowel.txt	43	B3	B	v	spectral	1.01956896619277
kmb11_vowel.txt	44	B3	B	v	spectral	0.965757040822119
kmb11_vowel.txt	45	B3	B	v	spectral	1.04226761783477
kmb11_vowel.txt	46	B3	B	v	spectral	0.97058248128998
kmb11_vowel.txt	47	B3	B	v	spectral	1.02577328947646
kmb11_vowel.txt	48	B3	B	v	spectral	0.974469348277835
kmb11_vowel.txt	49	B3	B	v	spectral	0.971259182833215
kmb11_vowel.txt	50	B3	B	v	spectral	0.998927288635172
kmb11_vowel.txt	51	B3	B	v	spectral	1.01444438916138
kmb11_vowel.txt	52	B3	B	v	spectral	0.970670523051583
kmb11_vowel.txt	53	B3	B	v	spectral	1.00427131283929
kmb11_vowel.txt	54	B3	B	v	spectral	0.980535039212958
kmb11_vowel.txt	55	B3	B	v	spectral	0.991394412228759
kmb11_vowel.txt	56	B3	B	v	spectral	0.989049068749456
kmb11_vowel.txt	57	B3	B	v	spectral	0.980939253822039
kmb11_vowel.txt	58	B3	B	v	spectral	0.961333704974473
kmb11_vowel.txt	59	B3	B	v	spectral	1.03330066745624
kmb11_vowel.txt	60	B3	B	v	spectral	0.975083376980581
kmb11_vowel.txt	61	B4	B	v	spectral	NA
kmb11_vowel.txt	62	B4	B	v	spectral	1.00940399996405
kmb11_vowel.txt	63	B4	B	v	spectral	1.01372410348622
kmb11_vowel.txt	64	B4	B	v	spectral	1.01066432278431
kmb11_vowel.txt	65	B4	B	v	spectral	1.00449243364085
kmb11_vowel.txt	66	B4	B	v	spectral	1.00049892480788
kmb11_vowel.txt	67	B4	B	v	spectral	0.969093685754719
kmb11_vowel.txt	68	B4	B	v	spectral	1.00562431069568
kmb11_vowel.txt	69	B4	B	v	spectral	0.945848387460611
kmb11_vowel.txt	70	B4	B	v	spectral	0.948624389869256
kmb11_vowel.txt	71	B4	B	v	spectral	0.982960159562927
kmb11_vowel.txt	72	B4	B	v	spectral	1.03565471296948
kmb11_vowel.txt	73	B4	B	v	spectral	0.997512415258089
kmb11_vowel.txt	74	B4	B	v	spectral	0.964031405707507
kmb11_vowel.txt	75	B4	B	v	spectral	1.03317215786771
kmb11_vowel.txt	76	B4	B	v	spectral	0.972999713809791
kmb11_vowel.txt	77	B4	B	v	spectral	1.01650239581801
kmb11_vowel.txt	78	B4	B	v	spectral	0.971323119580451
kmb11_vowel.txt	80	B4	B	v	spectral	1.01864260365393
kmb11_vowel.txt	81	B5	B	v	spectral	0.965811662175222
kmb11_vowel.txt	82	B5	B	v	spectral	0.912714086621359
kmb11_vowel.txt	83	B5	B	v	spectral	1.0021617313837
kmb11_vowel.txt	84	B5	B	v	spectral	0.926748047809053
kmb11_vowel.txt	85	B5	B	v	spectral	0.994375288669168
kmb11_vowel.txt	86	B5	B	v	spectral	0.955867623416133
kmb11_vowel.txt	87	B5	B	v	spectral	0.997943556741978
kmb11_vowel.txt	89	B5	B	v	spectral	0.936036059134162
kmb11_vowel.txt	90	B5	B	v	spectral	0.937724217271157
kmb11_vowel.txt	91	B5	B	v	spectral	0.962080999490066
kmb11_vowel.txt	92	B5	B	v	spectral	0.987526730982436
kmb11_vowel.txt	93	B5	B	v	spectral	0.984703224664134
kmb11_vowel.txt	94	B5	B	v	spectral	1.01710848136776
kmb11_vowel.txt	95	B5	B	v	spectral	0.998122721211587
kmb11_vowel.txt	96	B5	B	v	spectral	1.0133213559376
kmb11_vowel.txt	97	B5	B	v	spectral	1.01453758258681
kmb11_vowel.txt	98	B5	B	v	spectral	0.962131969356972
kmb11_vowel.txt	99	B5	B	v	spectral	1.02756288972247
kmb11_vowel.txt	100	B5	B	v	spectral	1.04994243961224
kmb11_vowel.txt	1	B1	R	v	spectral	0.976514070619981
kmb11_vowel.txt	2	B1	R	v	spectral	0.992572290336723
kmb11_vowel.txt	3	B1	R	v	spectral	1.02182561835863
kmb11_vowel.txt	4	B1	R	v	spectral	0.993536702205977
kmb11_vowel.txt	5	B1	R	v	spectral	0.985900594539799
kmb11_vowel.txt	6	B1	R	v	spectral	0.989403001480274
kmb11_vowel.txt	7	B1	R	v	spectral	1.02666261198474
kmb11_vowel.txt	8	B1	R	v	spectral	0.987183025320702
kmb11_vowel.txt	9	B1	R	v	spectral	1.01974194188793
kmb11_vowel.txt	10	B1	R	v	spectral	1.01104102191396
kmb11_vowel.txt	11	B1	R	v	spectral	1.02840940773011
kmb11_vowel.txt	12	B1	R	v	spectral	0.971685842919178
kmb11_vowel.txt	13	B1	R	v	spectral	0.986175283876944
kmb11_vowel.txt	14	B1	R	v	spectral	1.01613255538381
kmb11_vowel.txt	15	B1	R	v	spectral	1.03973534367745
kmb11_vowel.txt	16	B1	R	v	spectral	0.969114981585436
kmb11_vowel.txt	17	B1	R	v	spectral	1.02053077293153
kmb11_vowel.txt	18	B1	R	v	spectral	0.985098534610987
kmb11_vowel.txt	19	B1	R	v	spectral	0.96859556060326
kmb11_vowel.txt	20	B1	R	v	spectral	1.01014083803258
kmb11_vowel.txt	21	B2	R	v	spectral	0.938433068448857
kmb11_vowel.txt	22	B2	R	v	spectral	1.0126224757083
kmb11_vowel.txt	23	B2	R	v	spectral	1.00744979552537
kmb11_vowel.txt	24	B2	R	v	spectral	1.01651230949376
kmb11_vowel.txt	25	B2	R	v	spectral	1.00896073179337
kmb11_vowel.txt	26	B2	R	v	spectral	1.0223243311927
kmb11_vowel.txt	27	B2	R	v	spectral	0.982830509298459
kmb11_vowel.txt	29	B2	R	v	spectral	0.958451962233163
kmb11_vowel.txt	30	B2	R	v	spectral	0.943924151104082
kmb11_vowel.txt	31	B2	R	v	spectral	0.963969230380542
kmb11_vowel.txt	32	B2	R	v	spectral	0.989266134983276
kmb11_vowel.txt	33	B2	R	v	spectral	1.0142621150176
kmb11_vowel.txt	34	B2	R	v	spectral	1.01205369506232
kmb11_vowel.txt	35	B2	R	v	spectral	1.03169926321903
kmb11_vowel.txt	36	B2	R	v	spectral	NA
kmb11_vowel.txt	37	B2	R	v	spectral	0.952582984126636
kmb11_vowel.txt	38	B2	R	v	spectral	0.950110498987232
kmb11_vowel.txt	39	B2	R	v	spectral	0.968506559217805
kmb11_vowel.txt	40	B2	R	v	spectral	0.964132495477849
kmb11_vowel.txt	41	B3	R	v	spectral	1.04337105082415
kmb11_vowel.txt	42	B3	R	v	spectral	1.02036305988519
kmb11_vowel.txt	43	B3	R	v	spectral	1.05630087675299
kmb11_vowel.txt	44	B3	R	v	spectral	1.05411548388575
kmb11_vowel.txt	45	B3	R	v	spectral	1.05311735873143
kmb11_vowel.txt	46	B3	R	v	spectral	1.04013404467086
kmb11_vowel.txt	47	B3	R	v	spectral	1.03486705679593
kmb11_vowel.txt	48	B3	R	v	spectral	1.02962481021032
kmb11_vowel.txt	49	B3	R	v	spectral	0.951964655195044
kmb11_vowel.txt	50	B3	R	v	spectral	1.00991867501532
kmb11_vowel.txt	51	B3	R	v	spectral	0.963179386324513
kmb11_vowel.txt	52	B3	R	v	spectral	1.02765385486938
kmb11_vowel.txt	53	B3	R	v	spectral	1.0025189952178
kmb11_vowel.txt	54	B3	R	v	spectral	1.02617676127039
kmb11_vowel.txt	55	B3	R	v	spectral	1.00927151836594
kmb11_vowel.txt	56	B3	R	v	spectral	1.02036541419634
kmb11_vowel.txt	57	B3	R	v	spectral	1.00885686768311
kmb11_vowel.txt	58	B3	R	v	spectral	0.963577392589144
kmb11_vowel.txt	59	B3	R	v	spectral	0.96959281914635
kmb11_vowel.txt	60	B3	R	v	spectral	0.97383915722907
kmb11_vowel.txt	61	B4	R	v	spectral	1.00131401460266
kmb11_vowel.txt	62	B4	R	v	spectral	0.899109326742939
kmb11_vowel.txt	63	B4	R	v	spectral	0.922971420324464
kmb11_vowel.txt	64	B4	R	v	spectral	1.00896932825214
kmb11_vowel.txt	65	B4	R	v	spectral	0.969336626528685
kmb11_vowel.txt	66	B4	R	v	spectral	1.00814876594859
kmb11_vowel.txt	67	B4	R	v	spectral	1.00202886291037
kmb11_vowel.txt	68	B4	R	v	spectral	1.05452317599706
kmb11_vowel.txt	69	B4	R	v	spectral	1.01200729125708
kmb11_vowel.txt	70	B4	R	v	spectral	1.03986268737502
kmb11_vowel.txt	71	B4	R	v	spectral	0.983941916832936
kmb11_vowel.txt	72	B4	R	v	spectral	1.06743414913448
kmb11_vowel.txt	73	B4	R	v	spectral	0.919137814093641
kmb11_vowel.txt	75	B4	R	v	spectral	1.06712580407374
kmb11_vowel.txt	76	B4	R	v	spectral	0.979841068072002
kmb11_vowel.txt	77	B4	R	v	spectral	0.964320840637338
kmb11_vowel.txt	78	B4	R	v	spectral	1.00742563820878
kmb11_vowel.txt	79	B4	R	v	spectral	0.952686726217881
kmb11_vowel.txt	80	B4	R	v	spectral	0.951008014637366
kmb11_vowel.txt	81	B5	R	v	spectral	0.946691547619926
kmb11_vowel.txt	82	B5	R	v	spectral	0.94890138790544
kmb11_vowel.txt	83	B5	R	v	spectral	0.992084752556811
kmb11_vowel.txt	84	B5	R	v	spectral	0.964847835411168
kmb11_vowel.txt	85	B5	R	v	spectral	0.990389572886392
kmb11_vowel.txt	86	B5	R	v	spectral	0.950388376861257
kmb11_vowel.txt	87	B5	R	v	spectral	1.00922941940653
kmb11_vowel.txt	88	B5	R	v	spectral	0.996887265690351
kmb11_vowel.txt	89	B5	R	v	spectral	1.04169393404269
kmb11_vowel.txt	90	B5	R	v	spectral	1.06515395082884
kmb11_vowel.txt	91	B5	R	v	spectral	0.940203543897832
kmb11_vowel.txt	92	B5	R	v	spectral	1.06243783989241
kmb11_vowel.txt	93	B5	R	v	spectral	0.948904393081519
kmb11_vowel.txt	94	B5	R	v	spectral	0.975553520182277
kmb11_vowel.txt	95	B5	R	v	spectral	0.965934299567266
kmb11_vowel.txt	96	B5	R	v	spectral	1.03133888882399
kmb11_vowel.txt	97	B5	R	v	spectral	1.03169106117492
kmb11_vowel.txt	98	B5	R	v	spectral	1.02539928394135
kmb11_vowel.txt	99	B5	R	v	spectral	0.997943848071133
kmb11_vowel.txt	100	B5	R	v	spectral	1.0629395732387
kmb11_vowel.txt	1	B1	L	v	spectral	1.00305225558398
kmb11_vowel.txt	2	B1	L	v	spectral	1.0044975193063
kmb11_vowel.txt	3	B1	L	v	spectral	0.998150411418558
kmb11_vowel.txt	4	B1	L	v	spectral	1.00951347900648
kmb11_vowel.txt	5	B1	L	v	spectral	0.957819528968392
kmb11_vowel.txt	6	B1	L	v	spectral	1.02035017022573
kmb11_vowel.txt	7	B1	L	v	spectral	1.04082179145103
kmb11_vowel.txt	8	B1	L	v	spectral	1.01743175603809
kmb11_vowel.txt	9	B1	L	v	spectral	0.996433205860485
kmb11_vowel.txt	10	B1	L	v	spectral	0.966871788810404
kmb11_vowel.txt	11	B1	L	v	spectral	1.01772877867741
kmb11_vowel.txt	12	B1	L	v	spectral	0.996626887167708
kmb11_vowel.txt	13	B1	L	v	spectral	1.00588304730813
kmb11_vowel.txt	14	B1	L	v	spectral	1.01727440169817
kmb11_vowel.txt	15	B1	L	v	spectral	1.04905041871184
kmb11_vowel.txt	16	B1	L	v	spectral	0.990968995197917
kmb11_vowel.txt	17	B1	L	v	spectral	NA
kmb11_vowel.txt	18	B1	L	v	spectral	0.947033034331064
kmb11_vowel.txt	19	B1	L	v	spectral	0.967350371608155
kmb11_vowel.txt	20	B1	L	v	spectral	0.993142158630153
kmb11_vowel.txt	21	B2	L	v	spectral	0.934358910146294
kmb11_vowel.txt	22	B2	L	v	spectral	0.991150641497205
kmb11_vowel.txt	23	B2	L	v	spectral	0.99337119178663
kmb11_vowel.txt	24	B2	L	v	spectral	1.05212785694565
kmb11_vowel.txt	25	B2	L	v	spectral	1.04199104251104
kmb11_vowel.txt	26	B2	L	v	spectral	0.929647016879863
kmb11_vowel.txt	27	B2	L	v	spectral	1.03250768468533
kmb11_vowel.txt	28	B2	L	v	spectral	0.978172263372927
kmb11_vowel.txt	29	B2	L	v	spectral	0.983752192828488
kmb11_vowel.txt	30	B2	L	v	spectral	1.00066366335837
kmb11_vowel.txt	31	B2	L	v	spectral	1.01127533084501
kmb11_vowel.txt	32	B2	L	v	spectral	0.977165800693717
kmb11_vowel.txt	33	B2	L	v	spectral	1.00474823838415
kmb11_vowel.txt	34	B2	L	v	spectral	1.01247816738009
kmb11_vowel.txt	35	B2	L	v	spectral	0.954369937900344
kmb11_vowel.txt	36	B2	L	v	spectral	0.927033674110219
kmb11_vowel.txt	37	B2	L	v	spectral	0.964794593343559
kmb11_vowel.txt	38	B2	L	v	spectral	0.942806743206584
kmb11_vowel.txt	39	B2	L	v	spectral	0.913272444821536
kmb11_vowel.txt	40	B2	L	v	spectral	0.931635119277321
kmb11_vowel.txt	41	B3	L	v	spectral	0.992007203407699
kmb11_vowel.txt	42	B3	L	v	spectral	1.04270420272107
kmb11_vowel.txt	43	B3	L	v	spectral	1.0353750059762
kmb11_vowel.txt	44	B3	L	v	spectral	1.06600768611126
kmb11_vowel.txt	45	B3	L	v	spectral	1.0366988079866
kmb11_vowel.txt	46	B3	L	v	spectral	1.00092321466962
kmb11_vowel.txt	47	B3	L	v	spectral	1.01285452718503
kmb11_vowel.txt	48	B3	L	v	spectral	1.03853361922122
kmb11_vowel.txt	49	B3	L	v	spectral	1.03221031570101
kmb11_vowel.txt	50	B3	L	v	spectral	0.976860253286865
kmb11_vowel.txt	51	B3	L	v	spectral	1.04648378468942
kmb11_vowel.txt	52	B3	L	v	spectral	1.03781690777509
kmb11_vowel.txt	53	B3	L	v	spectral	1.03936417581576
kmb11_vowel.txt	54	B3	L	v	spectral	0.962096848667869
kmb11_vowel.txt	55	B3	L	v	spectral	1.05106712023636
kmb11_vowel.txt	56	B3	L	v	spectral	1.0438796966312
kmb11_vowel.txt	57	B3	L	v	spectral	0.960587189143085
kmb11_vowel.txt	58	B3	L	v	spectral	1.00567903441173
kmb11_vowel.txt	59	B3	L	v	spectral	0.986375726902791
kmb11_vowel.txt	60	B3	L	v	spectral	0.972176268374649
kmb11_vowel.txt	61	B4	L	v	spectral	NA
kmb11_vowel.txt	62	B4	L	v	spectral	0.983266438441342
kmb11_vowel.txt	63	B4	L	v	spectral	1.03324238608832
kmb11_vowel.txt	64	B4	L	v	spectral	0.984322165154204
kmb11_vowel.txt	65	B4	L	v	spectral	1.00441878639127
kmb11_vowel.txt	66	B4	L	v	spectral	1.03010960922259
kmb11_vowel.txt	67	B4	L	v	spectral	1.01415109709664
kmb11_vowel.txt	68	B4	L	v	spectral	1.0501003484188
kmb11_vowel.txt	69	B4	L	v	spectral	1.01935039184106
kmb11_vowel.txt	70	B4	L	v	spectral	1.07192252472594
kmb11_vowel.txt	71	B4	L	v	spectral	1.05315692772152
kmb11_vowel.txt	72	B4	L	v	spectral	1.01152187133282
kmb11_vowel.txt	73	B4	L	v	spectral	1.02780755112139
kmb11_vowel.txt	74	B4	L	v	spectral	1.03617087043218
kmb11_vowel.txt	75	B4	L	v	spectral	1.02489610767896
kmb11_vowel.txt	76	B4	L	v	spectral	0.958537223050487
kmb11_vowel.txt	77	B4	L	v	spectral	0.982450971931229
kmb11_vowel.txt	78	B4	L	v	spectral	0.999166491680913
kmb11_vowel.txt	79	B4	L	v	spectral	0.963964224370596
kmb11_vowel.txt	80	B4	L	v	spectral	0.965405778550495
kmb11_vowel.txt	81	B5	L	v	spectral	0.962292982713957
kmb11_vowel.txt	82	B5	L	v	spectral	0.992386471033809
kmb11_vowel.txt	83	B5	L	v	spectral	0.952242086615674
kmb11_vowel.txt	84	B5	L	v	spectral	0.971429901376163
kmb11_vowel.txt	85	B5	L	v	spectral	0.947088794633305
kmb11_vowel.txt	86	B5	L	v	spectral	0.968294642599853
kmb11_vowel.txt	87	B5	L	v	spectral	0.955892752558307
kmb11_vowel.txt	88	B5	L	v	spectral	0.964868738581401
kmb11_vowel.txt	89	B5	L	v	spectral	0.948213291239331
kmb11_vowel.txt	90	B5	L	v	spectral	0.953535022995638
kmb11_vowel.txt	91	B5	L	v	spectral	0.940436067596213
kmb11_vowel.txt	92	B5	L	v	spectral	0.982854346054297
kmb11_vowel.txt	93	B5	L	v	spectral	1.02583737639697
kmb11_vowel.txt	94	B5	L	v	spectral	0.987631797491252
kmb11_vowel.txt	95	B5	L	v	spectral	0.992626974901777
kmb11_vowel.txt	96	B5	L	v	spectral	0.972774375646567
kmb11_vowel.txt	97	B5	L	v	spectral	0.982236393145353
kmb11_vowel.txt	98	B5	L	v	spectral	1.01070628007752
kmb11_vowel.txt	99	B5	L	v	spectral	1.04287349940091
kmb11_vowel.txt	100	B5	L	v	spectral	NA
kra13_vowel.txt	1	B1	0KG	v	spectral	0.939032057768195
kra13_vowel.txt	2	B1	0KG	v	spectral	0.930900217239937
kra13_vowel.txt	3	B1	0KG	v	spectral	1.04673609919658
kra13_vowel.txt	4	B1	0KG	v	spectral	NA
kra13_vowel.txt	5	B1	0KG	v	spectral	1.02223959726887
kra13_vowel.txt	6	B1	0KG	v	spectral	1.05673245702927
kra13_vowel.txt	7	B1	0KG	v	spectral	1.0398982754992
kra13_vowel.txt	8	B1	0KG	v	spectral	0.940391867824205
kra13_vowel.txt	9	B1	0KG	v	spectral	0.955114583504791
kra13_vowel.txt	10	B1	0KG	v	spectral	0.994188626596364
kra13_vowel.txt	11	B1	0KG	v	spectral	0.967282783215459
kra13_vowel.txt	12	B1	0KG	v	spectral	0.973024634329091
kra13_vowel.txt	13	B1	0KG	v	spectral	1.08369346299259
kra13_vowel.txt	14	B1	0KG	v	spectral	1.03276979885596
kra13_vowel.txt	15	B1	0KG	v	spectral	1.03891839224496
kra13_vowel.txt	16	B1	0KG	v	spectral	1.05182215551764
kra13_vowel.txt	17	B1	0KG	v	spectral	1.02343258883774
kra13_vowel.txt	18	B1	0KG	v	spectral	1.01230821207612
kra13_vowel.txt	19	B1	0KG	v	spectral	0.959934040860703
kra13_vowel.txt	20	B1	0KG	v	spectral	0.931580149142334
kra13_vowel.txt	21	B2	0KG	v	spectral	0.94986897486892
kra13_vowel.txt	22	B2	0KG	v	spectral	0.888743281155323
kra13_vowel.txt	23	B2	0KG	v	spectral	0.880024341799634
kra13_vowel.txt	24	B2	0KG	v	spectral	0.955647092660865
kra13_vowel.txt	25	B2	0KG	v	spectral	1.01469206032739
kra13_vowel.txt	26	B2	0KG	v	spectral	0.864457075314344
kra13_vowel.txt	27	B2	0KG	v	spectral	0.912105740554054
kra13_vowel.txt	28	B2	0KG	v	spectral	0.942865333561935
kra13_vowel.txt	29	B2	0KG	v	spectral	0.864317293882268
kra13_vowel.txt	30	B2	0KG	v	spectral	0.798331994141437
kra13_vowel.txt	31	B2	0KG	v	spectral	0.812713269701549
kra13_vowel.txt	32	B2	0KG	v	spectral	0.923759872286515
kra13_vowel.txt	33	B2	0KG	v	spectral	0.81834312797219
kra13_vowel.txt	34	B2	0KG	v	spectral	0.935542108230979
kra13_vowel.txt	35	B2	0KG	v	spectral	0.854696742385901
kra13_vowel.txt	36	B2	0KG	v	spectral	0.944890857990903
kra13_vowel.txt	37	B2	0KG	v	spectral	0.77101418648828
kra13_vowel.txt	38	B2	0KG	v	spectral	0.813610124038334
kra13_vowel.txt	39	B2	0KG	v	spectral	0.894557996867906
kra13_vowel.txt	40	B2	0KG	v	spectral	0.950022106734692
kra13_vowel.txt	41	B3	0KG	v	spectral	0.982108300435554
kra13_vowel.txt	42	B3	0KG	v	spectral	1.00292871298934
kra13_vowel.txt	43	B3	0KG	v	spectral	0.892599732025287
kra13_vowel.txt	44	B3	0KG	v	spectral	0.923445254008641
kra13_vowel.txt	45	B3	0KG	v	spectral	0.959497234512533
kra13_vowel.txt	46	B3	0KG	v	spectral	0.831227112681757
kra13_vowel.txt	47	B3	0KG	v	spectral	0.915078636974682
kra13_vowel.txt	48	B3	0KG	v	spectral	0.945535118539602
kra13_vowel.txt	49	B3	0KG	v	spectral	0.935798073894804
kra13_vowel.txt	50	B3	0KG	v	spectral	0.965790719967178
kra13_vowel.txt	51	B3	0KG	v	spectral	0.938485865045545
kra13_vowel.txt	52	B3	0KG	v	spectral	NA
kra13_vowel.txt	53	B3	0KG	v	spectral	0.813081167045251
kra13_vowel.txt	54	B3	0KG	v	spectral	0.897657792575749
kra13_vowel.txt	55	B3	0KG	v	spectral	0.863382946468359
kra13_vowel.txt	56	B3	0KG	v	spectral	0.859110836179631
kra13_vowel.txt	57	B3	0KG	v	spectral	0.921183520397194
kra13_vowel.txt	58	B3	0KG	v	spectral	0.833089563328136
kra13_vowel.txt	59	B3	0KG	v	spectral	0.738277107325384
kra13_vowel.txt	60	B3	0KG	v	spectral	0.824671158904681
kra13_vowel.txt	61	B4	0KG	v	spectral	NA
kra13_vowel.txt	62	B4	0KG	v	spectral	0.885721668017061
kra13_vowel.txt	63	B4	0KG	v	spectral	0.937167750051964
kra13_vowel.txt	64	B4	0KG	v	spectral	0.801737305119121
kra13_vowel.txt	65	B4	0KG	v	spectral	1.00055189857807
kra13_vowel.txt	66	B4	0KG	v	spectral	0.955638910830538
kra13_vowel.txt	67	B4	0KG	v	spectral	0.896244364819545
kra13_vowel.txt	68	B4	0KG	v	spectral	0.906985305052213
kra13_vowel.txt	69	B4	0KG	v	spectral	0.902117354475152
kra13_vowel.txt	70	B4	0KG	v	spectral	0.919301680010306
kra13_vowel.txt	71	B4	0KG	v	spectral	0.951134065389779
kra13_vowel.txt	72	B4	0KG	v	spectral	0.961501758517251
kra13_vowel.txt	73	B4	0KG	v	spectral	0.9128868508822
kra13_vowel.txt	74	B4	0KG	v	spectral	0.951879271280779
kra13_vowel.txt	75	B4	0KG	v	spectral	0.924096131234587
kra13_vowel.txt	76	B4	0KG	v	spectral	0.912528479861318
kra13_vowel.txt	77	B4	0KG	v	spectral	0.857729824145673
kra13_vowel.txt	78	B4	0KG	v	spectral	0.988322641366659
kra13_vowel.txt	79	B4	0KG	v	spectral	0.867559987673909
kra13_vowel.txt	80	B4	0KG	v	spectral	0.999909895330145
kra13_vowel.txt	81	B5	0KG	v	spectral	NA
kra13_vowel.txt	82	B5	0KG	v	spectral	0.909635046619131
kra13_vowel.txt	83	B5	0KG	v	spectral	1.01257492364358
kra13_vowel.txt	84	B5	0KG	v	spectral	0.90169728089556
kra13_vowel.txt	85	B5	0KG	v	spectral	0.978538776106897
kra13_vowel.txt	86	B5	0KG	v	spectral	0.970939934894727
kra13_vowel.txt	87	B5	0KG	v	spectral	0.938553768649163
kra13_vowel.txt	88	B5	0KG	v	spectral	0.928033371833802
kra13_vowel.txt	89	B5	0KG	v	spectral	0.893968701615642
kra13_vowel.txt	90	B5	0KG	v	spectral	0.934453719211112
kra13_vowel.txt	91	B5	0KG	v	spectral	0.924699511582744
kra13_vowel.txt	92	B5	0KG	v	spectral	0.96057653068711
kra13_vowel.txt	93	B5	0KG	v	spectral	0.941460407784488
kra13_vowel.txt	94	B5	0KG	v	spectral	0.932787073125001
kra13_vowel.txt	95	B5	0KG	v	spectral	0.983066157003771
kra13_vowel.txt	96	B5	0KG	v	spectral	0.897012044720816
kra13_vowel.txt	97	B5	0KG	v	spectral	0.852774224025497
kra13_vowel.txt	98	B5	0KG	v	spectral	0.944162231701995
kra13_vowel.txt	99	B5	0KG	v	spectral	0.952374057408625
kra13_vowel.txt	100	B5	0KG	v	spectral	0.96507855545063
kra13_vowel.txt	1	B1	B	v	spectral	1.00177569874643
kra13_vowel.txt	2	B1	B	v	spectral	1.03990942585076
kra13_vowel.txt	3	B1	B	v	spectral	1.01675420678786
kra13_vowel.txt	4	B1	B	v	spectral	1.02408376473377
kra13_vowel.txt	5	B1	B	v	spectral	0.980700095067927
kra13_vowel.txt	6	B1	B	v	spectral	1.01864243644492
kra13_vowel.txt	7	B1	B	v	spectral	0.983388179673426
kra13_vowel.txt	8	B1	B	v	spectral	1.00806916520875
kra13_vowel.txt	9	B1	B	v	spectral	1.03157595669433
kra13_vowel.txt	10	B1	B	v	spectral	1.01727973835972
kra13_vowel.txt	11	B1	B	v	spectral	1.01870533180896
kra13_vowel.txt	12	B1	B	v	spectral	0.951962465265042
kra13_vowel.txt	13	B1	B	v	spectral	NA
kra13_vowel.txt	14	B1	B	v	spectral	1.0166133256332
kra13_vowel.txt	15	B1	B	v	spectral	0.949323048408876
kra13_vowel.txt	16	B1	B	v	spectral	0.986860544325329
kra13_vowel.txt	17	B1	B	v	spectral	1.01347313967046
kra13_vowel.txt	18	B1	B	v	spectral	1.00337036401386
kra13_vowel.txt	19	B1	B	v	spectral	0.973409036013815
kra13_vowel.txt	20	B1	B	v	spectral	0.964104077292574
kra13_vowel.txt	21	B2	B	v	spectral	0.990038419543501
kra13_vowel.txt	22	B2	B	v	spectral	0.894856534507537
kra13_vowel.txt	23	B2	B	v	spectral	0.951189896677017
kra13_vowel.txt	24	B2	B	v	spectral	0.973050994634283
kra13_vowel.txt	25	B2	B	v	spectral	0.890204671719414
kra13_vowel.txt	26	B2	B	v	spectral	0.973242077719614
kra13_vowel.txt	27	B2	B	v	spectral	0.873909769522551
kra13_vowel.txt	28	B2	B	v	spectral	0.841601343570115
kra13_vowel.txt	29	B2	B	v	spectral	0.79866886957721
kra13_vowel.txt	30	B2	B	v	spectral	0.809716115955158
kra13_vowel.txt	31	B2	B	v	spectral	0.905516197360076
kra13_vowel.txt	32	B2	B	v	spectral	0.82928069561499
kra13_vowel.txt	33	B2	B	v	spectral	NA
kra13_vowel.txt	34	B2	B	v	spectral	0.849996441203018
kra13_vowel.txt	35	B2	B	v	spectral	0.873307180983474
kra13_vowel.txt	36	B2	B	v	spectral	0.863421269840941
kra13_vowel.txt	37	B2	B	v	spectral	0.844044100267293
kra13_vowel.txt	38	B2	B	v	spectral	0.802492436979253
kra13_vowel.txt	39	B2	B	v	spectral	0.9655804652935
kra13_vowel.txt	40	B2	B	v	spectral	0.897517627945284
kra13_vowel.txt	41	B3	B	v	spectral	0.870610339008987
kra13_vowel.txt	42	B3	B	v	spectral	0.768904914293241
kra13_vowel.txt	43	B3	B	v	spectral	0.944675685007624
kra13_vowel.txt	44	B3	B	v	spectral	0.869018270132638
kra13_vowel.txt	45	B3	B	v	spectral	NA
kra13_vowel.txt	46	B3	B	v	spectral	0.715155298167981
kra13_vowel.txt	47	B3	B	v	spectral	0.854219790481844
kra13_vowel.txt	48	B3	B	v	spectral	0.959511391728387
kra13_vowel.txt	49	B3	B	v	spectral	0.867097191585113
kra13_vowel.txt	50	B3	B	v	spectral	0.901778334806513
kra13_vowel.txt	51	B3	B	v	spectral	0.958999967339808
kra13_vowel.txt	52	B3	B	v	spectral	0.838007191953574
kra13_vowel.txt	53	B3	B	v	spectral	0.870872227041274
kra13_vowel.txt	54	B3	B	v	spectral	0.848927957555316
kra13_vowel.txt	55	B3	B	v	spectral	0.866692741600861
kra13_vowel.txt	56	B3	B	v	spectral	0.811607462708254
kra13_vowel.txt	57	B3	B	v	spectral	0.745650503854209
kra13_vowel.txt	58	B3	B	v	spectral	0.865341885689957
kra13_vowel.txt	59	B3	B	v	spectral	0.903857368840957
kra13_vowel.txt	60	B3	B	v	spectral	0.855920771073609
kra13_vowel.txt	61	B4	B	v	spectral	0.985952825265191
kra13_vowel.txt	62	B4	B	v	spectral	0.96598267176873
kra13_vowel.txt	63	B4	B	v	spectral	0.893071274221468
kra13_vowel.txt	64	B4	B	v	spectral	0.836874171985912
kra13_vowel.txt	65	B4	B	v	spectral	0.891713950380162
kra13_vowel.txt	66	B4	B	v	spectral	0.872672154530262
kra13_vowel.txt	67	B4	B	v	spectral	NA
kra13_vowel.txt	68	B4	B	v	spectral	0.871574712368281
kra13_vowel.txt	69	B4	B	v	spectral	0.915544797074519
kra13_vowel.txt	70	B4	B	v	spectral	0.897336571344556
kra13_vowel.txt	71	B4	B	v	spectral	0.943469480388992
kra13_vowel.txt	72	B4	B	v	spectral	0.843142449933382
kra13_vowel.txt	73	B4	B	v	spectral	0.882945846203661
kra13_vowel.txt	74	B4	B	v	spectral	0.910359062681269
kra13_vowel.txt	75	B4	B	v	spectral	0.90473809754358
kra13_vowel.txt	76	B4	B	v	spectral	0.933830008089911
kra13_vowel.txt	77	B4	B	v	spectral	0.905234929843603
kra13_vowel.txt	78	B4	B	v	spectral	0.96599151680062
kra13_vowel.txt	79	B4	B	v	spectral	NA
kra13_vowel.txt	80	B4	B	v	spectral	0.911592525854221
kra13_vowel.txt	81	B5	B	v	spectral	0.962116039491333
kra13_vowel.txt	82	B5	B	v	spectral	1.05334446365126
kra13_vowel.txt	83	B5	B	v	spectral	0.991402381816018
kra13_vowel.txt	84	B5	B	v	spectral	1.02863473671955
kra13_vowel.txt	85	B5	B	v	spectral	1.01574883668835
kra13_vowel.txt	86	B5	B	v	spectral	0.951648327452703
kra13_vowel.txt	87	B5	B	v	spectral	NA
kra13_vowel.txt	88	B5	B	v	spectral	0.941898010774769
kra13_vowel.txt	89	B5	B	v	spectral	0.982068725696408
kra13_vowel.txt	90	B5	B	v	spectral	0.94468091585831
kra13_vowel.txt	91	B5	B	v	spectral	0.871347236478266
kra13_vowel.txt	92	B5	B	v	spectral	0.950604961387219
kra13_vowel.txt	93	B5	B	v	spectral	0.889054690482416
kra13_vowel.txt	94	B5	B	v	spectral	0.921194027803414
kra13_vowel.txt	95	B5	B	v	spectral	0.938293167312437
kra13_vowel.txt	96	B5	B	v	spectral	1.00330695045177
kra13_vowel.txt	97	B5	B	v	spectral	0.950822210238635
kra13_vowel.txt	98	B5	B	v	spectral	0.974987665310124
kra13_vowel.txt	99	B5	B	v	spectral	0.892239000509509
kra13_vowel.txt	100	B5	B	v	spectral	0.851238995948691
kra13_vowel.txt	1	B1	R	v	spectral	0.983624586883789
kra13_vowel.txt	2	B1	R	v	spectral	1.02886368832018
kra13_vowel.txt	3	B1	R	v	spectral	1.01086978244834
kra13_vowel.txt	4	B1	R	v	spectral	1.01920958001172
kra13_vowel.txt	5	B1	R	v	spectral	1.01813958339511
kra13_vowel.txt	6	B1	R	v	spectral	1.02398817536814
kra13_vowel.txt	7	B1	R	v	spectral	NA
kra13_vowel.txt	8	B1	R	v	spectral	0.981541943834221
kra13_vowel.txt	9	B1	R	v	spectral	0.983868620372621
kra13_vowel.txt	10	B1	R	v	spectral	1.03209815995355
kra13_vowel.txt	11	B1	R	v	spectral	0.957114150973157
kra13_vowel.txt	12	B1	R	v	spectral	NA
kra13_vowel.txt	13	B1	R	v	spectral	0.965036615664699
kra13_vowel.txt	14	B1	R	v	spectral	0.986908273299462
kra13_vowel.txt	15	B1	R	v	spectral	0.99194518666871
kra13_vowel.txt	16	B1	R	v	spectral	NA
kra13_vowel.txt	17	B1	R	v	spectral	1.032999980396
kra13_vowel.txt	18	B1	R	v	spectral	1.00563075591886
kra13_vowel.txt	19	B1	R	v	spectral	1.01756197010555
kra13_vowel.txt	20	B1	R	v	spectral	0.960598946385891
kra13_vowel.txt	21	B2	R	v	spectral	0.969325747092632
kra13_vowel.txt	22	B2	R	v	spectral	NA
kra13_vowel.txt	23	B2	R	v	spectral	0.778901556893071
kra13_vowel.txt	24	B2	R	v	spectral	0.82427879328895
kra13_vowel.txt	25	B2	R	v	spectral	0.874040164691757
kra13_vowel.txt	26	B2	R	v	spectral	0.850070248233039
kra13_vowel.txt	27	B2	R	v	spectral	0.969150479214871
kra13_vowel.txt	28	B2	R	v	spectral	0.823809144394823
kra13_vowel.txt	29	B2	R	v	spectral	0.878778146520368
kra13_vowel.txt	30	B2	R	v	spectral	0.811479415716853
kra13_vowel.txt	31	B2	R	v	spectral	0.882616311581604
kra13_vowel.txt	32	B2	R	v	spectral	0.835370395336931
kra13_vowel.txt	33	B2	R	v	spectral	0.880495949496621
kra13_vowel.txt	34	B2	R	v	spectral	0.932049071558127
kra13_vowel.txt	35	B2	R	v	spectral	0.885913754469582
kra13_vowel.txt	36	B2	R	v	spectral	0.79581886137022
kra13_vowel.txt	37	B2	R	v	spectral	0.888539331029725
kra13_vowel.txt	38	B2	R	v	spectral	0.828526600471318
kra13_vowel.txt	39	B2	R	v	spectral	0.76686108321049
kra13_vowel.txt	40	B2	R	v	spectral	0.853151120160138
kra13_vowel.txt	41	B3	R	v	spectral	0.943560802013011
kra13_vowel.txt	42	B3	R	v	spectral	0.895336338840733
kra13_vowel.txt	43	B3	R	v	spectral	0.878118406539798
kra13_vowel.txt	44	B3	R	v	spectral	0.885494908972716
kra13_vowel.txt	45	B3	R	v	spectral	0.780924517244074
kra13_vowel.txt	46	B3	R	v	spectral	0.924312930194759
kra13_vowel.txt	47	B3	R	v	spectral	0.909290030482782
kra13_vowel.txt	48	B3	R	v	spectral	0.899684331807544
kra13_vowel.txt	49	B3	R	v	spectral	0.910341174586139
kra13_vowel.txt	50	B3	R	v	spectral	0.782104550915993
kra13_vowel.txt	51	B3	R	v	spectral	0.792840198759514
kra13_vowel.txt	52	B3	R	v	spectral	0.805013462293731
kra13_vowel.txt	53	B3	R	v	spectral	0.814777479981433
kra13_vowel.txt	54	B3	R	v	spectral	0.849675510987834
kra13_vowel.txt	55	B3	R	v	spectral	0.960568572156
kra13_vowel.txt	56	B3	R	v	spectral	0.8549950922443
kra13_vowel.txt	57	B3	R	v	spectral	0.921788376765938
kra13_vowel.txt	58	B3	R	v	spectral	0.866878308991907
kra13_vowel.txt	59	B3	R	v	spectral	0.85055666477232
kra13_vowel.txt	60	B3	R	v	spectral	0.839847858748818
kra13_vowel.txt	61	B4	R	v	spectral	0.95629811136115
kra13_vowel.txt	62	B4	R	v	spectral	0.874517497715941
kra13_vowel.txt	63	B4	R	v	spectral	0.836649204512406
kra13_vowel.txt	64	B4	R	v	spectral	0.882514390659559
kra13_vowel.txt	65	B4	R	v	spectral	0.944700874809136
kra13_vowel.txt	66	B4	R	v	spectral	0.86377787250366
kra13_vowel.txt	67	B4	R	v	spectral	0.881542073454372
kra13_vowel.txt	68	B4	R	v	spectral	0.825132640702902
kra13_vowel.txt	69	B4	R	v	spectral	0.882084789879975
kra13_vowel.txt	70	B4	R	v	spectral	0.96766975664565
kra13_vowel.txt	71	B4	R	v	spectral	0.943498411252314
kra13_vowel.txt	72	B4	R	v	spectral	0.939108917835949
kra13_vowel.txt	73	B4	R	v	spectral	0.894413047473562
kra13_vowel.txt	74	B4	R	v	spectral	0.928326927505957
kra13_vowel.txt	75	B4	R	v	spectral	0.975813084402618
kra13_vowel.txt	76	B4	R	v	spectral	0.90368208814564
kra13_vowel.txt	77	B4	R	v	spectral	0.809030474158756
kra13_vowel.txt	78	B4	R	v	spectral	0.967500444912694
kra13_vowel.txt	79	B4	R	v	spectral	0.847500489209336
kra13_vowel.txt	80	B4	R	v	spectral	0.915357414543322
kra13_vowel.txt	81	B5	R	v	spectral	0.976058302665703
kra13_vowel.txt	82	B5	R	v	spectral	NA
kra13_vowel.txt	83	B5	R	v	spectral	0.957908700009754
kra13_vowel.txt	84	B5	R	v	spectral	0.879356314501056
kra13_vowel.txt	85	B5	R	v	spectral	0.905394481792912
kra13_vowel.txt	86	B5	R	v	spectral	0.844873252113265
kra13_vowel.txt	87	B5	R	v	spectral	0.896053420707669
kra13_vowel.txt	88	B5	R	v	spectral	0.972179058477192
kra13_vowel.txt	89	B5	R	v	spectral	0.898287552861851
kra13_vowel.txt	90	B5	R	v	spectral	0.927420822506031
kra13_vowel.txt	91	B5	R	v	spectral	0.938539973966527
kra13_vowel.txt	92	B5	R	v	spectral	0.945533622497305
kra13_vowel.txt	93	B5	R	v	spectral	0.985097465037839
kra13_vowel.txt	94	B5	R	v	spectral	0.944587525256355
kra13_vowel.txt	95	B5	R	v	spectral	1.00491776937196
kra13_vowel.txt	96	B5	R	v	spectral	0.902212125850714
kra13_vowel.txt	97	B5	R	v	spectral	0.969270481537434
kra13_vowel.txt	98	B5	R	v	spectral	0.95041603504952
kra13_vowel.txt	99	B5	R	v	spectral	0.931335919045039
kra13_vowel.txt	100	B5	R	v	spectral	0.938201859686603
kra13_vowel.txt	1	B1	L	v	spectral	NA
kra13_vowel.txt	2	B1	L	v	spectral	0.928662130293245
kra13_vowel.txt	3	B1	L	v	spectral	1.01846637224084
kra13_vowel.txt	4	B1	L	v	spectral	1.01712790814523
kra13_vowel.txt	5	B1	L	v	spectral	0.989353266426377
kra13_vowel.txt	6	B1	L	v	spectral	1.01751404470974
kra13_vowel.txt	7	B1	L	v	spectral	1.00566372528341
kra13_vowel.txt	8	B1	L	v	spectral	0.998299304881472
kra13_vowel.txt	9	B1	L	v	spectral	0.95505034876259
kra13_vowel.txt	10	B1	L	v	spectral	1.02762759363936
kra13_vowel.txt	11	B1	L	v	spectral	1.03262973886472
kra13_vowel.txt	12	B1	L	v	spectral	0.935416582711768
kra13_vowel.txt	13	B1	L	v	spectral	0.984548034373141
kra13_vowel.txt	14	B1	L	v	spectral	0.965318937020126
kra13_vowel.txt	15	B1	L	v	spectral	0.995687738363423
kra13_vowel.txt	16	B1	L	v	spectral	1.00883798121451
kra13_vowel.txt	17	B1	L	v	spectral	1.02741039026965
kra13_vowel.txt	18	B1	L	v	spectral	1.00534999526725
kra13_vowel.txt	19	B1	L	v	spectral	1.04672712963634
kra13_vowel.txt	20	B1	L	v	spectral	1.04030877789681
kra13_vowel.txt	21	B2	L	v	spectral	0.888538751397098
kra13_vowel.txt	22	B2	L	v	spectral	0.936680757739965
kra13_vowel.txt	23	B2	L	v	spectral	0.879407952689361
kra13_vowel.txt	24	B2	L	v	spectral	0.979796089700178
kra13_vowel.txt	25	B2	L	v	spectral	0.965708043707715
kra13_vowel.txt	26	B2	L	v	spectral	0.929399673929304
kra13_vowel.txt	27	B2	L	v	spectral	0.875754976775217
kra13_vowel.txt	28	B2	L	v	spectral	0.84694595333688
kra13_vowel.txt	29	B2	L	v	spectral	0.78604817508109
kra13_vowel.txt	30	B2	L	v	spectral	0.787769107263257
kra13_vowel.txt	31	B2	L	v	spectral	0.864931848451635
kra13_vowel.txt	32	B2	L	v	spectral	0.866990554489613
kra13_vowel.txt	33	B2	L	v	spectral	0.781166024668481
kra13_vowel.txt	34	B2	L	v	spectral	0.766028607275391
kra13_vowel.txt	35	B2	L	v	spectral	0.857935641288333
kra13_vowel.txt	36	B2	L	v	spectral	0.904808369652633
kra13_vowel.txt	37	B2	L	v	spectral	0.88838905974841
kra13_vowel.txt	38	B2	L	v	spectral	0.76010751725003
kra13_vowel.txt	39	B2	L	v	spectral	0.827687941187255
kra13_vowel.txt	40	B2	L	v	spectral	0.899058350917268
kra13_vowel.txt	41	B3	L	v	spectral	0.939615577532663
kra13_vowel.txt	42	B3	L	v	spectral	0.850747592377427
kra13_vowel.txt	43	B3	L	v	spectral	0.982809295422798
kra13_vowel.txt	44	B3	L	v	spectral	0.973505435150507
kra13_vowel.txt	45	B3	L	v	spectral	0.949623568867207
kra13_vowel.txt	46	B3	L	v	spectral	0.953286175281982
kra13_vowel.txt	47	B3	L	v	spectral	0.915726789236716
kra13_vowel.txt	48	B3	L	v	spectral	0.845321266797708
kra13_vowel.txt	49	B3	L	v	spectral	0.902560222525336
kra13_vowel.txt	50	B3	L	v	spectral	0.896106455501825
kra13_vowel.txt	51	B3	L	v	spectral	0.856752560415561
kra13_vowel.txt	52	B3	L	v	spectral	0.90613977645951
kra13_vowel.txt	53	B3	L	v	spectral	0.906929843006745
kra13_vowel.txt	54	B3	L	v	spectral	0.862232658075834
kra13_vowel.txt	55	B3	L	v	spectral	0.945110053899007
kra13_vowel.txt	56	B3	L	v	spectral	0.787138617468138
kra13_vowel.txt	57	B3	L	v	spectral	0.776398869598918
kra13_vowel.txt	58	B3	L	v	spectral	0.868018312556307
kra13_vowel.txt	59	B3	L	v	spectral	0.823497039863977
kra13_vowel.txt	60	B3	L	v	spectral	0.890228522619383
kra13_vowel.txt	61	B4	L	v	spectral	0.871165195928602
kra13_vowel.txt	62	B4	L	v	spectral	0.906781740710595
kra13_vowel.txt	63	B4	L	v	spectral	0.870740408383498
kra13_vowel.txt	64	B4	L	v	spectral	0.849626384909641
kra13_vowel.txt	65	B4	L	v	spectral	0.902351357452922
kra13_vowel.txt	66	B4	L	v	spectral	0.882453229465349
kra13_vowel.txt	67	B4	L	v	spectral	0.882902185572342
kra13_vowel.txt	68	B4	L	v	spectral	0.834401398869254
kra13_vowel.txt	69	B4	L	v	spectral	0.858620546334534
kra13_vowel.txt	70	B4	L	v	spectral	0.826131358655263
kra13_vowel.txt	71	B4	L	v	spectral	0.901982744226345
kra13_vowel.txt	72	B4	L	v	spectral	0.988460135247259
kra13_vowel.txt	73	B4	L	v	spectral	0.937072104760604
kra13_vowel.txt	74	B4	L	v	spectral	0.942327396090381
kra13_vowel.txt	75	B4	L	v	spectral	0.946045956934605
kra13_vowel.txt	76	B4	L	v	spectral	0.924934502918166
kra13_vowel.txt	77	B4	L	v	spectral	0.929389640568411
kra13_vowel.txt	78	B4	L	v	spectral	0.9145129459061
kra13_vowel.txt	79	B4	L	v	spectral	0.97217142225846
kra13_vowel.txt	80	B4	L	v	spectral	NA
kra13_vowel.txt	81	B5	L	v	spectral	0.975670617586575
kra13_vowel.txt	82	B5	L	v	spectral	0.966706911199757
kra13_vowel.txt	83	B5	L	v	spectral	0.94694395156191
kra13_vowel.txt	84	B5	L	v	spectral	0.989172441247566
kra13_vowel.txt	85	B5	L	v	spectral	0.989578441060369
kra13_vowel.txt	86	B5	L	v	spectral	0.922191906150542
kra13_vowel.txt	87	B5	L	v	spectral	0.977845853914688
kra13_vowel.txt	88	B5	L	v	spectral	0.920819146940135
kra13_vowel.txt	89	B5	L	v	spectral	1.00695493148417
kra13_vowel.txt	90	B5	L	v	spectral	0.987751649502782
kra13_vowel.txt	91	B5	L	v	spectral	0.933615510403585
kra13_vowel.txt	92	B5	L	v	spectral	0.914440330843639
kra13_vowel.txt	93	B5	L	v	spectral	0.908047015728103
kra13_vowel.txt	94	B5	L	v	spectral	0.929968845796587
kra13_vowel.txt	95	B5	L	v	spectral	0.941864324284685
kra13_vowel.txt	96	B5	L	v	spectral	0.947170379898904
kra13_vowel.txt	97	B5	L	v	spectral	0.984041650059177
kra13_vowel.txt	98	B5	L	v	spectral	0.943533948387805
kra13_vowel.txt	99	B5	L	v	spectral	0.887440726889311
kra13_vowel.txt	100	B5	L	v	spectral	0.971008136444654
mha30_vowel.txt	1	B1	0KG	v	spectral	NA
mha30_vowel.txt	2	B1	0KG	v	spectral	0.949822417781127
mha30_vowel.txt	3	B1	0KG	v	spectral	1.01226719843289
mha30_vowel.txt	4	B1	0KG	v	spectral	1.01053225444307
[truncated: 11,963 more rows]

## Sheet: Figure 2
Figure 2
VP	trial	Block	Cond	phonem	type	values				Cond	type	marginal estimated mean	model derived s.e.m
bms31_vowel.txt	1	B1	R	v	spectral	0.936414190285355				L	spectral	0.978	0.0118
bms31_vowel.txt	2	B1	R	v	spectral	0.953552135844695				L	temporal	0.970	0.0122
bms31_vowel.txt	3	B1	R	v	spectral	0.989355491231989				R	spectral	0.964	0.0129
bms31_vowel.txt	4	B1	R	v	spectral	0.985013627837278				R	temporal	0.984	0.0133
bms31_vowel.txt	5	B1	R	v	spectral	0.987629275967881
bms31_vowel.txt	6	B1	R	v	spectral	1.00971480632901
bms31_vowel.txt	7	B1	R	v	spectral	0.978204453920274
bms31_vowel.txt	8	B1	R	v	spectral	0.983054576369078
bms31_vowel.txt	9	B1	R	v	spectral	0.99250707456735
bms31_vowel.txt	10	B1	R	v	spectral	0.974026681834288
bms31_vowel.txt	11	B1	R	v	spectral	0.985783247387289
bms31_vowel.txt	12	B1	R	v	spectral	0.997608961891407
bms31_vowel.txt	13	B1	R	v	spectral	1.00058885161987
bms31_vowel.txt	14	B1	R	v	spectral	0.993716635535447
bms31_vowel.txt	15	B1	R	v	spectral	1.01325387425347
bms31_vowel.txt	16	B1	R	v	spectral	1.07907142596631
bms31_vowel.txt	17	B1	R	v	spectral	1.05418632677234
bms31_vowel.txt	18	B1	R	v	spectral	1.03965382036078
bms31_vowel.txt	19	B1	R	v	spectral	1.04666454202588
bms31_vowel.txt	20	B1	R	v	spectral	NA
bms31_vowel.txt	21	B2	R	v	spectral	0.985702090085797
bms31_vowel.txt	22	B2	R	v	spectral	0.974511571137346
bms31_vowel.txt	23	B2	R	v	spectral	0.96357644214547
bms31_vowel.txt	24	B2	R	v	spectral	0.978734154745308
bms31_vowel.txt	25	B2	R	v	spectral	0.937033044717126
bms31_vowel.txt	26	B2	R	v	spectral	0.996112751534266
bms31_vowel.txt	27	B2	R	v	spectral	1.07661697851192
bms31_vowel.txt	28	B2	R	v	spectral	1.0392319994
bms31_vowel.txt	29	B2	R	v	spectral	1.05475885020804
bms31_vowel.txt	30	B2	R	v	spectral	0.962822631190513
bms31_vowel.txt	31	B2	R	v	spectral	0.969965979063053
bms31_vowel.txt	32	B2	R	v	spectral	NA
bms31_vowel.txt	33	B2	R	v	spectral	0.965955858390852
bms31_vowel.txt	34	B2	R	v	spectral	1.06109592481855
bms31_vowel.txt	35	B2	R	v	spectral	0.999547551058236
bms31_vowel.txt	36	B2	R	v	spectral	0.946994795244376
bms31_vowel.txt	37	B2	R	v	spectral	0.977934896387359
bms31_vowel.txt	38	B2	R	v	spectral	1.00273487067688
bms31_vowel.txt	39	B2	R	v	spectral	0.947898523643498
bms31_vowel.txt	40	B2	R	v	spectral	0.98813510083026
bms31_vowel.txt	41	B3	R	v	spectral	0.981612044538321
bms31_vowel.txt	42	B3	R	v	spectral	0.984295614524039
bms31_vowel.txt	43	B3	R	v	spectral	1.01133975325408
bms31_vowel.txt	44	B3	R	v	spectral	0.976264234017647
bms31_vowel.txt	45	B3	R	v	spectral	0.927813771083524
bms31_vowel.txt	46	B3	R	v	spectral	0.906363947702417
bms31_vowel.txt	47	B3	R	v	spectral	0.933218413151388
bms31_vowel.txt	48	B3	R	v	spectral	0.967342199860245
bms31_vowel.txt	49	B3	R	v	spectral	0.959901766091653
bms31_vowel.txt	50	B3	R	v	spectral	0.963706126972648
bms31_vowel.txt	51	B3	R	v	spectral	NA
bms31_vowel.txt	52	B3	R	v	spectral	0.954475383067822
bms31_vowel.txt	53	B3	R	v	spectral	0.894551963066775
bms31_vowel.txt	54	B3	R	v	spectral	0.900215970015556
bms31_vowel.txt	55	B3	R	v	spectral	0.886098641304967
bms31_vowel.txt	56	B3	R	v	spectral	0.908493129730799
bms31_vowel.txt	57	B3	R	v	spectral	0.961845542704276
bms31_vowel.txt	58	B3	R	v	spectral	0.937585834475218
bms31_vowel.txt	59	B3	R	v	spectral	0.994600104426338
bms31_vowel.txt	60	B3	R	v	spectral	0.907800247503486
bms31_vowel.txt	61	B4	R	v	spectral	0.94438311798719
bms31_vowel.txt	62	B4	R	v	spectral	1.00711610849623
bms31_vowel.txt	63	B4	R	v	spectral	1.02199588749648
bms31_vowel.txt	64	B4	R	v	spectral	1.02556731696012
bms31_vowel.txt	65	B4	R	v	spectral	0.976201809963208
bms31_vowel.txt	66	B4	R	v	spectral	0.97209968484612
bms31_vowel.txt	67	B4	R	v	spectral	0.96194346359659
bms31_vowel.txt	68	B4	R	v	spectral	0.968493696849516
bms31_vowel.txt	69	B4	R	v	spectral	0.896743086855141
bms31_vowel.txt	70	B4	R	v	spectral	1.01777090901208
bms31_vowel.txt	71	B4	R	v	spectral	0.975403363153781
bms31_vowel.txt	72	B4	R	v	spectral	0.890587377086244
bms31_vowel.txt	73	B4	R	v	spectral	0.946445094399144
bms31_vowel.txt	74	B4	R	v	spectral	0.932261376077737
bms31_vowel.txt	75	B4	R	v	spectral	1.00101988191712
bms31_vowel.txt	76	B4	R	v	spectral	0.967804085341135
bms31_vowel.txt	77	B4	R	v	spectral	0.978195834071823
bms31_vowel.txt	78	B4	R	v	spectral	0.912843795490603
bms31_vowel.txt	79	B4	R	v	spectral	0.962480679575632
bms31_vowel.txt	80	B4	R	v	spectral	1.0425278533959
bms31_vowel.txt	81	B5	R	v	spectral	0.948195191952883
bms31_vowel.txt	82	B5	R	v	spectral	0.995265081477463
bms31_vowel.txt	83	B5	R	v	spectral	0.957468776664561
bms31_vowel.txt	84	B5	R	v	spectral	0.968597976137124
bms31_vowel.txt	85	B5	R	v	spectral	0.955688706227867
bms31_vowel.txt	86	B5	R	v	spectral	0.964930599752465
bms31_vowel.txt	87	B5	R	v	spectral	0.967371474838363
bms31_vowel.txt	88	B5	R	v	spectral	0.916144975009973
bms31_vowel.txt	89	B5	R	v	spectral	0.96973178895901
bms31_vowel.txt	90	B5	R	v	spectral	1.01616005306072
bms31_vowel.txt	91	B5	R	v	spectral	NA
bms31_vowel.txt	92	B5	R	v	spectral	0.973201961898646
bms31_vowel.txt	93	B5	R	v	spectral	1.02734606076669
bms31_vowel.txt	94	B5	R	v	spectral	0.927552833843649
bms31_vowel.txt	95	B5	R	v	spectral	0.9933648070328
bms31_vowel.txt	96	B5	R	v	spectral	1.00865611200505
bms31_vowel.txt	97	B5	R	v	spectral	0.962171562205861
bms31_vowel.txt	98	B5	R	v	spectral	0.994215338749264
bms31_vowel.txt	99	B5	R	v	spectral	1.01838499341142
bms31_vowel.txt	100	B5	R	v	spectral	0.971651292331222
bms31_vowel.txt	1	B1	L	v	spectral	0.987382300871278
bms31_vowel.txt	2	B1	L	v	spectral	NA
bms31_vowel.txt	3	B1	L	v	spectral	0.969265345620916
bms31_vowel.txt	4	B1	L	v	spectral	0.970965883858349
bms31_vowel.txt	5	B1	L	v	spectral	0.990407132048086
bms31_vowel.txt	6	B1	L	v	spectral	1.00930618452806
bms31_vowel.txt	7	B1	L	v	spectral	0.997290153080761
bms31_vowel.txt	8	B1	L	v	spectral	0.973154696990162
bms31_vowel.txt	9	B1	L	v	spectral	NA
bms31_vowel.txt	10	B1	L	v	spectral	1.01998233751241
bms31_vowel.txt	11	B1	L	v	spectral	1.00547877794531
bms31_vowel.txt	12	B1	L	v	spectral	1.02528277679521
bms31_vowel.txt	13	B1	L	v	spectral	0.982423713211289
bms31_vowel.txt	14	B1	L	v	spectral	1.02483515393519
bms31_vowel.txt	15	B1	L	v	spectral	1.01959661447712
bms31_vowel.txt	16	B1	L	v	spectral	1.02404110842746
bms31_vowel.txt	17	B1	L	v	spectral	0.999271733576427
bms31_vowel.txt	18	B1	L	v	spectral	1.00799398821871
bms31_vowel.txt	19	B1	L	v	spectral	0.973657033370345
bms31_vowel.txt	20	B1	L	v	spectral	1.01966506553292
bms31_vowel.txt	21	B2	L	v	spectral	0.961257821809471
bms31_vowel.txt	22	B2	L	v	spectral	0.950680134623036
bms31_vowel.txt	23	B2	L	v	spectral	0.972155408552036
bms31_vowel.txt	24	B2	L	v	spectral	1.01359845621716
bms31_vowel.txt	25	B2	L	v	spectral	0.946264010062375
bms31_vowel.txt	26	B2	L	v	spectral	1.02393111356592
bms31_vowel.txt	27	B2	L	v	spectral	0.961053015342143
bms31_vowel.txt	28	B2	L	v	spectral	1.03622542722472
bms31_vowel.txt	29	B2	L	v	spectral	1.00089780492701
bms31_vowel.txt	30	B2	L	v	spectral	1.01450379747807
bms31_vowel.txt	31	B2	L	v	spectral	0.964991090388614
bms31_vowel.txt	32	B2	L	v	spectral	1.00833703772266
bms31_vowel.txt	33	B2	L	v	spectral	1.01261282930548
bms31_vowel.txt	34	B2	L	v	spectral	0.99232454475609
bms31_vowel.txt	35	B2	L	v	spectral	0.9870105893437
bms31_vowel.txt	36	B2	L	v	spectral	1.01090451282625
bms31_vowel.txt	37	B2	L	v	spectral	1.01298248588973
bms31_vowel.txt	38	B2	L	v	spectral	0.957856576147975
bms31_vowel.txt	39	B2	L	v	spectral	1.02638173462541
bms31_vowel.txt	40	B2	L	v	spectral	0.996864738546121
bms31_vowel.txt	41	B3	L	v	spectral	0.972517684337866
bms31_vowel.txt	42	B3	L	v	spectral	0.96858096045911
bms31_vowel.txt	43	B3	L	v	spectral	NA
bms31_vowel.txt	44	B3	L	v	spectral	1.04022073174559
bms31_vowel.txt	45	B3	L	v	spectral	0.981154246826825
bms31_vowel.txt	46	B3	L	v	spectral	0.980291587582865
bms31_vowel.txt	47	B3	L	v	spectral	0.968203469013156
bms31_vowel.txt	48	B3	L	v	spectral	1.01079293213309
bms31_vowel.txt	49	B3	L	v	spectral	0.954423947128838
bms31_vowel.txt	50	B3	L	v	spectral	0.963806293506184
bms31_vowel.txt	51	B3	L	v	spectral	0.922575419770133
bms31_vowel.txt	52	B3	L	v	spectral	0.897367680283316
bms31_vowel.txt	53	B3	L	v	spectral	0.976168422957447
bms31_vowel.txt	54	B3	L	v	spectral	0.94433652747183
bms31_vowel.txt	55	B3	L	v	spectral	0.946358230386204
bms31_vowel.txt	56	B3	L	v	spectral	0.993153158320811
bms31_vowel.txt	57	B3	L	v	spectral	0.985909417557631
bms31_vowel.txt	58	B3	L	v	spectral	0.968826676887093
bms31_vowel.txt	59	B3	L	v	spectral	0.94351846062537
bms31_vowel.txt	60	B3	L	v	spectral	0.929406007675751
bms31_vowel.txt	61	B4	L	v	spectral	0.987549563402848
bms31_vowel.txt	62	B4	L	v	spectral	1.02226507173316
bms31_vowel.txt	63	B4	L	v	spectral	0.982798183935759
bms31_vowel.txt	64	B4	L	v	spectral	0.961039968636941
bms31_vowel.txt	65	B4	L	v	spectral	0.971437353228221
bms31_vowel.txt	66	B4	L	v	spectral	1.06914810530583
bms31_vowel.txt	67	B4	L	v	spectral	1.01311320785517
bms31_vowel.txt	68	B4	L	v	spectral	1.02880324251994
bms31_vowel.txt	69	B4	L	v	spectral	NA
bms31_vowel.txt	70	B4	L	v	spectral	0.928845269605156
bms31_vowel.txt	71	B4	L	v	spectral	0.962560221382291
bms31_vowel.txt	72	B4	L	v	spectral	0.973119539871378
bms31_vowel.txt	73	B4	L	v	spectral	0.999477950673982
bms31_vowel.txt	74	B4	L	v	spectral	1.05897568361172
bms31_vowel.txt	75	B4	L	v	spectral	1.00341230383885
bms31_vowel.txt	76	B4	L	v	spectral	1.00504919100998
bms31_vowel.txt	77	B4	L	v	spectral	1.02306785474277
bms31_vowel.txt	78	B4	L	v	spectral	0.934891497851425
bms31_vowel.txt	79	B4	L	v	spectral	1.07134131376915
bms31_vowel.txt	80	B4	L	v	spectral	0.998674212202607
bms31_vowel.txt	81	B5	L	v	spectral	1.01715955450453
bms31_vowel.txt	82	B5	L	v	spectral	1.03529744035717
bms31_vowel.txt	83	B5	L	v	spectral	1.02445165138597
bms31_vowel.txt	84	B5	L	v	spectral	1.01679847162644
bms31_vowel.txt	85	B5	L	v	spectral	NA
bms31_vowel.txt	86	B5	L	v	spectral	0.983420992425135
bms31_vowel.txt	87	B5	L	v	spectral	0.959921024543955
bms31_vowel.txt	88	B5	L	v	spectral	1.09500586812243
bms31_vowel.txt	89	B5	L	v	spectral	0.958079873057265
bms31_vowel.txt	90	B5	L	v	spectral	0.985358013508098
bms31_vowel.txt	91	B5	L	v	spectral	0.992761993486581
bms31_vowel.txt	92	B5	L	v	spectral	1.05485085193686
bms31_vowel.txt	93	B5	L	v	spectral	1.00014967309996
bms31_vowel.txt	94	B5	L	v	spectral	0.977389479308024
bms31_vowel.txt	95	B5	L	v	spectral	1.00729315483141
bms31_vowel.txt	96	B5	L	v	spectral	1.00311511902339
bms31_vowel.txt	97	B5	L	v	spectral	1.00621085776941
bms31_vowel.txt	98	B5	L	v	spectral	1.02501755954103
bms31_vowel.txt	99	B5	L	v	spectral	1.00399333908116
bms31_vowel.txt	100	B5	L	v	spectral	0.954798614298812
gsx11_vowel.txt	1	B1	R	v	spectral	1.05254786233997
gsx11_vowel.txt	2	B1	R	v	spectral	1.06603275938591
gsx11_vowel.txt	3	B1	R	v	spectral	0.981444591507963
gsx11_vowel.txt	4	B1	R	v	spectral	1.03647967229966
gsx11_vowel.txt	5	B1	R	v	spectral	1.01488607306279
gsx11_vowel.txt	6	B1	R	v	spectral	1.03272068966528
gsx11_vowel.txt	7	B1	R	v	spectral	1.02394061282884
gsx11_vowel.txt	8	B1	R	v	spectral	0.972223864759121
gsx11_vowel.txt	9	B1	R	v	spectral	0.937950041765065
gsx11_vowel.txt	10	B1	R	v	spectral	1.02298261416037
gsx11_vowel.txt	11	B1	R	v	spectral	0.936946633073884
gsx11_vowel.txt	12	B1	R	v	spectral	0.963906837650674
gsx11_vowel.txt	13	B1	R	v	spectral	1.00000685027
gsx11_vowel.txt	14	B1	R	v	spectral	0.990799789050107
gsx11_vowel.txt	15	B1	R	v	spectral	1.0466519667394
gsx11_vowel.txt	16	B1	R	v	spectral	1.02374718630456
gsx11_vowel.txt	17	B1	R	v	spectral	0.974307352583196
gsx11_vowel.txt	18	B1	R	v	spectral	0.981762740577823
gsx11_vowel.txt	19	B1	R	v	spectral	0.992277410791793
gsx11_vowel.txt	20	B1	R	v	spectral	0.948384451183604
gsx11_vowel.txt	21	B2	R	v	spectral	1.00639246186851
gsx11_vowel.txt	22	B2	R	v	spectral	0.966296514575902
gsx11_vowel.txt	23	B2	R	v	spectral	0.97952758745097
gsx11_vowel.txt	24	B2	R	v	spectral	1.00575157755192
gsx11_vowel.txt	25	B2	R	v	spectral	0.920278695111528
gsx11_vowel.txt	26	B2	R	v	spectral	0.918185691048074
gsx11_vowel.txt	27	B2	R	v	spectral	NA
gsx11_vowel.txt	28	B2	R	v	spectral	0.973729154330819
gsx11_vowel.txt	29	B2	R	v	spectral	0.977641656728418
gsx11_vowel.txt	30	B2	R	v	spectral	0.935713098955633
gsx11_vowel.txt	31	B2	R	v	spectral	0.930113951552537
gsx11_vowel.txt	32	B2	R	v	spectral	1.01243598696212
gsx11_vowel.txt	33	B2	R	v	spectral	0.927631628239866
gsx11_vowel.txt	34	B2	R	v	spectral	0.944634098651022
gsx11_vowel.txt	35	B2	R	v	spectral	0.901100156358445
gsx11_vowel.txt	36	B2	R	v	spectral	0.935223462095811
gsx11_vowel.txt	37	B2	R	v	spectral	0.982687460305267
gsx11_vowel.txt	38	B2	R	v	spectral	0.961681579140049
gsx11_vowel.txt	39	B2	R	v	spectral	0.931012100775309
gsx11_vowel.txt	40	B2	R	v	spectral	0.981950844690421
gsx11_vowel.txt	41	B3	R	v	spectral	0.915938866743007
gsx11_vowel.txt	42	B3	R	v	spectral	0.933705072857819
gsx11_vowel.txt	43	B3	R	v	spectral	0.92924841943959
gsx11_vowel.txt	44	B3	R	v	spectral	0.919551525903879
gsx11_vowel.txt	45	B3	R	v	spectral	0.909290536278092
gsx11_vowel.txt	46	B3	R	v	spectral	0.883595489952155
gsx11_vowel.txt	47	B3	R	v	spectral	0.897735817997265
gsx11_vowel.txt	48	B3	R	v	spectral	0.900926597079311
gsx11_vowel.txt	49	B3	R	v	spectral	0.875487094040993
gsx11_vowel.txt	50	B3	R	v	spectral	0.940117629069454
gsx11_vowel.txt	51	B3	R	v	spectral	0.882515029212634
gsx11_vowel.txt	52	B3	R	v	spectral	0.906700498654228
gsx11_vowel.txt	53	B3	R	v	spectral	0.889259254644897
gsx11_vowel.txt	54	B3	R	v	spectral	0.893812851562997
gsx11_vowel.txt	55	B3	R	v	spectral	0.91799600060516
gsx11_vowel.txt	56	B3	R	v	spectral	0.910988427522944
gsx11_vowel.txt	57	B3	R	v	spectral	0.879056480942858
gsx11_vowel.txt	58	B3	R	v	spectral	0.918723409262582
gsx11_vowel.txt	59	B3	R	v	spectral	0.908906582057088
gsx11_vowel.txt	60	B3	R	v	spectral	NA
gsx11_vowel.txt	61	B4	R	v	spectral	0.939359384728699
gsx11_vowel.txt	62	B4	R	v	spectral	0.918431171165482
gsx11_vowel.txt	63	B4	R	v	spectral	0.921703349824048
gsx11_vowel.txt	64	B4	R	v	spectral	0.952104315346312
gsx11_vowel.txt	65	B4	R	v	spectral	0.878706511439299
gsx11_vowel.txt	66	B4	R	v	spectral	0.899030921733323
gsx11_vowel.txt	67	B4	R	v	spectral	0.905026778476389
gsx11_vowel.txt	68	B4	R	v	spectral	0.936447859520393
gsx11_vowel.txt	69	B4	R	v	spectral	0.982235018475832
gsx11_vowel.txt	70	B4	R	v	spectral	0.964836034944996
gsx11_vowel.txt	71	B4	R	v	spectral	0.966539250151197
gsx11_vowel.txt	72	B4	R	v	spectral	1.00054660002004
gsx11_vowel.txt	73	B4	R	v	spectral	0.992177611275628
gsx11_vowel.txt	74	B4	R	v	spectral	NA
gsx11_vowel.txt	75	B4	R	v	spectral	0.917516720225034
gsx11_vowel.txt	76	B4	R	v	spectral	0.942129857895512
gsx11_vowel.txt	77	B4	R	v	spectral	0.968103462620937
gsx11_vowel.txt	78	B4	R	v	spectral	1.00641622533817
gsx11_vowel.txt	79	B4	R	v	spectral	1.0232990186593
gsx11_vowel.txt	80	B4	R	v	spectral	1.00891457985918
gsx11_vowel.txt	81	B5	R	v	spectral	0.937822857058523
gsx11_vowel.txt	82	B5	R	v	spectral	0.92226834930517
gsx11_vowel.txt	83	B5	R	v	spectral	0.982488413580369
gsx11_vowel.txt	84	B5	R	v	spectral	0.975211681393529
gsx11_vowel.txt	85	B5	R	v	spectral	0.970511211320808
gsx11_vowel.txt	86	B5	R	v	spectral	0.947466355834965
gsx11_vowel.txt	87	B5	R	v	spectral	0.97424648501842
gsx11_vowel.txt	88	B5	R	v	spectral	1.00519965830063
gsx11_vowel.txt	89	B5	R	v	spectral	0.900891059840075
gsx11_vowel.txt	90	B5	R	v	spectral	0.903481526529551
gsx11_vowel.txt	91	B5	R	v	spectral	1.00621295569553
gsx11_vowel.txt	92	B5	R	v	spectral	1.00843536044961
gsx11_vowel.txt	93	B5	R	v	spectral	0.973140374209709
gsx11_vowel.txt	94	B5	R	v	spectral	0.971174886065209
gsx11_vowel.txt	95	B5	R	v	spectral	1.0027805926988
gsx11_vowel.txt	96	B5	R	v	spectral	0.923466877313972
gsx11_vowel.txt	97	B5	R	v	spectral	0.919693317426023
gsx11_vowel.txt	98	B5	R	v	spectral	1.03288129156743
gsx11_vowel.txt	99	B5	R	v	spectral	0.9504602570767
gsx11_vowel.txt	100	B5	R	v	spectral	0.911324409688449
gsx11_vowel.txt	1	B1	L	v	spectral	0.958006055483767
gsx11_vowel.txt	2	B1	L	v	spectral	0.987467923077633
gsx11_vowel.txt	3	B1	L	v	spectral	1.03342315645033
gsx11_vowel.txt	4	B1	L	v	spectral	1.02660936761281
gsx11_vowel.txt	5	B1	L	v	spectral	1.00653429013156
gsx11_vowel.txt	6	B1	L	v	spectral	1.05609439022907
gsx11_vowel.txt	7	B1	L	v	spectral	0.993539198573617
gsx11_vowel.txt	8	B1	L	v	spectral	1.01303399226191
gsx11_vowel.txt	9	B1	L	v	spectral	0.985952717462801
gsx11_vowel.txt	10	B1	L	v	spectral	0.988677942398327
gsx11_vowel.txt	11	B1	L	v	spectral	0.994495084120875
gsx11_vowel.txt	12	B1	L	v	spectral	0.973076812837668
gsx11_vowel.txt	13	B1	L	v	spectral	0.993933297834513
gsx11_vowel.txt	14	B1	L	v	spectral	0.989369580145477
gsx11_vowel.txt	15	B1	L	v	spectral	1.01703448414493
gsx11_vowel.txt	16	B1	L	v	spectral	0.988502293302311
gsx11_vowel.txt	17	B1	L	v	spectral	0.983088705853324
gsx11_vowel.txt	18	B1	L	v	spectral	NA
gsx11_vowel.txt	19	B1	L	v	spectral	1.02772938444567
gsx11_vowel.txt	20	B1	L	v	spectral	0.983431323633417
gsx11_vowel.txt	21	B2	L	v	spectral	1.00306459767619
gsx11_vowel.txt	22	B2	L	v	spectral	1.03507260254332
gsx11_vowel.txt	23	B2	L	v	spectral	1.05612490609272
gsx11_vowel.txt	24	B2	L	v	spectral	1.05624057340916
gsx11_vowel.txt	25	B2	L	v	spectral	0.989580687688681
gsx11_vowel.txt	26	B2	L	v	spectral	1.04764357299706
gsx11_vowel.txt	27	B2	L	v	spectral	1.0443095066998
gsx11_vowel.txt	28	B2	L	v	spectral	0.980395517971333
gsx11_vowel.txt	29	B2	L	v	spectral	0.989080401929429
gsx11_vowel.txt	30	B2	L	v	spectral	0.9733069942559
gsx11_vowel.txt	31	B2	L	v	spectral	0.967348097904433
gsx11_vowel.txt	32	B2	L	v	spectral	0.982760824803633
gsx11_vowel.txt	33	B2	L	v	spectral	0.988433416966089
gsx11_vowel.txt	34	B2	L	v	spectral	0.96445681940362
gsx11_vowel.txt	35	B2	L	v	spectral	0.949990283637286
gsx11_vowel.txt	36	B2	L	v	spectral	0.984679186925753
gsx11_vowel.txt	37	B2	L	v	spectral	0.911783051391484
gsx11_vowel.txt	38	B2	L	v	spectral	0.956773431358252
gsx11_vowel.txt	39	B2	L	v	spectral	0.944928837284679
gsx11_vowel.txt	40	B2	L	v	spectral	0.930191925524268
gsx11_vowel.txt	41	B3	L	v	spectral	NA
gsx11_vowel.txt	42	B3	L	v	spectral	0.904450430742977
gsx11_vowel.txt	43	B3	L	v	spectral	0.92817038233274
gsx11_vowel.txt	44	B3	L	v	spectral	0.93437597704466
gsx11_vowel.txt	45	B3	L	v	spectral	0.886523158789749
gsx11_vowel.txt	46	B3	L	v	spectral	0.902041677129979
gsx11_vowel.txt	47	B3	L	v	spectral	0.900867722845906
gsx11_vowel.txt	48	B3	L	v	spectral	0.896237663017655
gsx11_vowel.txt	49	B3	L	v	spectral	0.871571231812949
gsx11_vowel.txt	50	B3	L	v	spectral	0.851772314141614
gsx11_vowel.txt	51	B3	L	v	spectral	0.892810645762069
gsx11_vowel.txt	52	B3	L	v	spectral	0.901030821136439
gsx11_vowel.txt	53	B3	L	v	spectral	0.881274462347843
gsx11_vowel.txt	54	B3	L	v	spectral	0.92831360633055
gsx11_vowel.txt	55	B3	L	v	spectral	0.926854061294695
gsx11_vowel.txt	56	B3	L	v	spectral	0.879336020474134
gsx11_vowel.txt	57	B3	L	v	spectral	0.872508902115258
gsx11_vowel.txt	58	B3	L	v	spectral	NA
gsx11_vowel.txt	59	B3	L	v	spectral	0.900485448763138
gsx11_vowel.txt	60	B3	L	v	spectral	0.895713012383313
gsx11_vowel.txt	61	B4	L	v	spectral	NA
gsx11_vowel.txt	62	B4	L	v	spectral	0.903631267145942
gsx11_vowel.txt	63	B4	L	v	spectral	0.875942293949165
gsx11_vowel.txt	64	B4	L	v	spectral	0.912206537640281
gsx11_vowel.txt	65	B4	L	v	spectral	0.863462254477248
gsx11_vowel.txt	66	B4	L	v	spectral	0.928328492787976
gsx11_vowel.txt	67	B4	L	v	spectral	0.89521476384851
gsx11_vowel.txt	68	B4	L	v	spectral	0.935449502556753
gsx11_vowel.txt	69	B4	L	v	spectral	0.869310383388104
gsx11_vowel.txt	70	B4	L	v	spectral	0.911227293614223
gsx11_vowel.txt	71	B4	L	v	spectral	0.93936514256931
gsx11_vowel.txt	72	B4	L	v	spectral	0.945210903726612
gsx11_vowel.txt	73	B4	L	v	spectral	0.919792872167608
gsx11_vowel.txt	74	B4	L	v	spectral	0.913669478140776
gsx11_vowel.txt	75	B4	L	v	spectral	0.907870660998294
gsx11_vowel.txt	76	B4	L	v	spectral	0.903964012151691
gsx11_vowel.txt	77	B4	L	v	spectral	0.908633823677535
gsx11_vowel.txt	78	B4	L	v	spectral	0.914682727020858
gsx11_vowel.txt	79	B4	L	v	spectral	0.940194978872107
gsx11_vowel.txt	80	B4	L	v	spectral	0.954576911913365
gsx11_vowel.txt	81	B5	L	v	spectral	0.943667033181351
gsx11_vowel.txt	82	B5	L	v	spectral	0.830859488798888
gsx11_vowel.txt	83	B5	L	v	spectral	0.918147859929511
gsx11_vowel.txt	84	B5	L	v	spectral	0.912503354843339
gsx11_vowel.txt	85	B5	L	v	spectral	0.922127125772895
gsx11_vowel.txt	86	B5	L	v	spectral	0.915957571508538
gsx11_vowel.txt	87	B5	L	v	spectral	0.848552012638673
gsx11_vowel.txt	88	B5	L	v	spectral	0.889033584541946
gsx11_vowel.txt	89	B5	L	v	spectral	NA
gsx11_vowel.txt	90	B5	L	v	spectral	0.958273035831615
gsx11_vowel.txt	91	B5	L	v	spectral	0.894066992104356
gsx11_vowel.txt	92	B5	L	v	spectral	0.901642103037508
gsx11_vowel.txt	93	B5	L	v	spectral	0.899425562720157
gsx11_vowel.txt	94	B5	L	v	spectral	0.929611730382191
gsx11_vowel.txt	95	B5	L	v	spectral	0.931787709026319
gsx11_vowel.txt	96	B5	L	v	spectral	0.901570320721677
gsx11_vowel.txt	97	B5	L	v	spectral	0.916590677949455
gsx11_vowel.txt	98	B5	L	v	spectral	0.976012061814768
gsx11_vowel.txt	99	B5	L	v	spectral	0.889431519325126
gsx11_vowel.txt	100	B5	L	v	spectral	0.908186855083078
hhp03_vowel.txt	1	B1	R	v	spectral	1.03209134243448
hhp03_vowel.txt	2	B1	R	v	spectral	1.02536577541128
hhp03_vowel.txt	3	B1	R	v	spectral	1.00123789228614
hhp03_vowel.txt	4	B1	R	v	spectral	0.957529664896529
hhp03_vowel.txt	5	B1	R	v	spectral	0.998128900154033
hhp03_vowel.txt	6	B1	R	v	spectral	0.993576441794594
hhp03_vowel.txt	7	B1	R	v	spectral	0.956427429804409
hhp03_vowel.txt	8	B1	R	v	spectral	0.984420756797049
hhp03_vowel.txt	9	B1	R	v	spectral	1.00652652278361
hhp03_vowel.txt	10	B1	R	v	spectral	1.01277406238037
hhp03_vowel.txt	11	B1	R	v	spectral	1.03668119308877
hhp03_vowel.txt	12	B1	R	v	spectral	1.01354867447101
hhp03_vowel.txt	13	B1	R	v	spectral	1.02245156870448
hhp03_vowel.txt	14	B1	R	v	spectral	0.984109808573105
hhp03_vowel.txt	15	B1	R	v	spectral	0.981751926981012
hhp03_vowel.txt	16	B1	R	v	spectral	1.00507644240267
hhp03_vowel.txt	17	B1	R	v	spectral	0.998826703372942
hhp03_vowel.txt	18	B1	R	v	spectral	0.954515510263645
hhp03_vowel.txt	19	B1	R	v	spectral	1.03276509031342
hhp03_vowel.txt	20	B1	R	v	spectral	1.00219429308644
hhp03_vowel.txt	21	B2	R	v	spectral	1.02356540306748
hhp03_vowel.txt	22	B2	R	v	spectral	NA
hhp03_vowel.txt	23	B2	R	v	spectral	1.01358400613235
hhp03_vowel.txt	24	B2	R	v	spectral	0.996586206239259
hhp03_vowel.txt	25	B2	R	v	spectral	0.992661153561533
hhp03_vowel.txt	26	B2	R	v	spectral	0.941725188848986
hhp03_vowel.txt	27	B2	R	v	spectral	0.920712211954481
hhp03_vowel.txt	28	B2	R	v	spectral	0.993957113162204
hhp03_vowel.txt	29	B2	R	v	spectral	0.982745961749386
hhp03_vowel.txt	30	B2	R	v	spectral	0.948696969832579
hhp03_vowel.txt	31	B2	R	v	spectral	1.01773422826355
hhp03_vowel.txt	32	B2	R	v	spectral	0.974300374413
hhp03_vowel.txt	33	B2	R	v	spectral	1.02376090708532
hhp03_vowel.txt	34	B2	R	v	spectral	1.00627690482998
hhp03_vowel.txt	35	B2	R	v	spectral	1.03755658314223
hhp03_vowel.txt	36	B2	R	v	spectral	1.02912790906356
hhp03_vowel.txt	37	B2	R	v	spectral	0.950931150672762
hhp03_vowel.txt	38	B2	R	v	spectral	0.966283399768106
hhp03_vowel.txt	39	B2	R	v	spectral	0.978622096552141
hhp03_vowel.txt	40	B2	R	v	spectral	0.951728174723725
hhp03_vowel.txt	41	B3	R	v	spectral	1.00108785998239
hhp03_vowel.txt	42	B3	R	v	spectral	NA
hhp03_vowel.txt	43	B3	R	v	spectral	0.947646378676495
hhp03_vowel.txt	44	B3	R	v	spectral	0.977524371759751
hhp03_vowel.txt	45	B3	R	v	spectral	0.971329834338395
hhp03_vowel.txt	46	B3	R	v	spectral	0.961148806760611
hhp03_vowel.txt	47	B3	R	v	spectral	0.988361241228934
hhp03_vowel.txt	48	B3	R	v	spectral	1.00210836369669
hhp03_vowel.txt	49	B3	R	v	spectral	0.970284239195612
hhp03_vowel.txt	50	B3	R	v	spectral	0.90357224765695
hhp03_vowel.txt	51	B3	R	v	spectral	1.00265320815545
hhp03_vowel.txt	52	B3	R	v	spectral	0.882851610335984
hhp03_vowel.txt	53	B3	R	v	spectral	0.964555130490357
hhp03_vowel.txt	54	B3	R	v	spectral	1.01334202646297
hhp03_vowel.txt	55	B3	R	v	spectral	0.991391767505814
hhp03_vowel.txt	56	B3	R	v	spectral	0.939992003645935
hhp03_vowel.txt	57	B3	R	v	spectral	0.991091722850947
hhp03_vowel.txt	58	B3	R	v	spectral	0.9472183387695
hhp03_vowel.txt	59	B3	R	v	spectral	0.93480546457517
hhp03_vowel.txt	60	B3	R	v	spectral	0.962634599780908
hhp03_vowel.txt	61	B4	R	v	spectral	0.992894151470765
hhp03_vowel.txt	62	B4	R	v	spectral	0.941752464359031
hhp03_vowel.txt	63	B4	R	v	spectral	1.03524797781431
hhp03_vowel.txt	64	B4	R	v	spectral	0.95319675358519
hhp03_vowel.txt	65	B4	R	v	spectral	0.992888719948365
hhp03_vowel.txt	66	B4	R	v	spectral	0.925993431326002
hhp03_vowel.txt	67	B4	R	v	spectral	0.965339826445447
hhp03_vowel.txt	68	B4	R	v	spectral	0.946227749208611
hhp03_vowel.txt	69	B4	R	v	spectral	NA
hhp03_vowel.txt	70	B4	R	v	spectral	NA
hhp03_vowel.txt	71	B4	R	v	spectral	0.918358984925075
hhp03_vowel.txt	72	B4	R	v	spectral	0.895147869151908
hhp03_vowel.txt	73	B4	R	v	spectral	0.967921200108405
hhp03_vowel.txt	74	B4	R	v	spectral	0.958666161690067
hhp03_vowel.txt	75	B4	R	v	spectral	1.00081629701712
hhp03_vowel.txt	76	B4	R	v	spectral	0.951836132524438
hhp03_vowel.txt	77	B4	R	v	spectral	0.951370497040996
hhp03_vowel.txt	78	B4	R	v	spectral	1.03893761770625
hhp03_vowel.txt	79	B4	R	v	spectral	0.961575123424637
hhp03_vowel.txt	80	B4	R	v	spectral	0.942060955879515
hhp03_vowel.txt	81	B5	R	v	spectral	1.0004872468818
hhp03_vowel.txt	82	B5	R	v	spectral	0.969736217192191
hhp03_vowel.txt	83	B5	R	v	spectral	0.972709557969026
hhp03_vowel.txt	84	B5	R	v	spectral	1.04086434374678
hhp03_vowel.txt	85	B5	R	v	spectral	1.01271344443572
hhp03_vowel.txt	86	B5	R	v	spectral	0.918643832394258
hhp03_vowel.txt	87	B5	R	v	spectral	1.01200769414726
hhp03_vowel.txt	88	B5	R	v	spectral	0.990520660414044
hhp03_vowel.txt	89	B5	R	v	spectral	1.03163712558369
hhp03_vowel.txt	90	B5	R	v	spectral	0.950966558443302
hhp03_vowel.txt	91	B5	R	v	spectral	1.00938412284167
hhp03_vowel.txt	92	B5	R	v	spectral	1.03753314373818
hhp03_vowel.txt	93	B5	R	v	spectral	0.961149447158065
hhp03_vowel.txt	94	B5	R	v	spectral	1.08209080976292
hhp03_vowel.txt	95	B5	R	v	spectral	0.998806702494783
hhp03_vowel.txt	96	B5	R	v	spectral	1.10059580998943
hhp03_vowel.txt	97	B5	R	v	spectral	0.96619287919827
hhp03_vowel.txt	98	B5	R	v	spectral	1.08225637307656
hhp03_vowel.txt	99	B5	R	v	spectral	NA
hhp03_vowel.txt	100	B5	R	v	spectral	0.998101629696239
hhp03_vowel.txt	1	B1	L	v	spectral	0.967056030907288
hhp03_vowel.txt	2	B1	L	v	spectral	1.01189671468477
hhp03_vowel.txt	3	B1	L	v	spectral	1.00904604679794
hhp03_vowel.txt	4	B1	L	v	spectral	0.980722733007138
hhp03_vowel.txt	5	B1	L	v	spectral	1.01502485251183
hhp03_vowel.txt	6	B1	L	v	spectral	0.99693955676943
hhp03_vowel.txt	7	B1	L	v	spectral	1.01686063603627
hhp03_vowel.txt	8	B1	L	v	spectral	0.986165543036646
hhp03_vowel.txt	9	B1	L	v	spectral	1.04338695877271
hhp03_vowel.txt	10	B1	L	v	spectral	NA
hhp03_vowel.txt	11	B1	L	v	spectral	0.988747714560952
hhp03_vowel.txt	12	B1	L	v	spectral	1.0395898381974
hhp03_vowel.txt	13	B1	L	v	spectral	1.02865827933301
hhp03_vowel.txt	14	B1	L	v	spectral	1.0220041225585
hhp03_vowel.txt	15	B1	L	v	spectral	1.02643853822147
hhp03_vowel.txt	16	B1	L	v	spectral	1.00033309401337
hhp03_vowel.txt	17	B1	L	v	spectral	0.947379082945748
hhp03_vowel.txt	18	B1	L	v	spectral	0.975497353606558
hhp03_vowel.txt	19	B1	L	v	spectral	0.944252904038978
hhp03_vowel.txt	20	B1	L	v	spectral	NA
hhp03_vowel.txt	21	B2	L	v	spectral	1.00856434211072
hhp03_vowel.txt	22	B2	L	v	spectral	0.977181803414042
hhp03_vowel.txt	23	B2	L	v	spectral	0.921741887577887
hhp03_vowel.txt	24	B2	L	v	spectral	0.930213320352663
hhp03_vowel.txt	25	B2	L	v	spectral	0.98757943291436
hhp03_vowel.txt	26	B2	L	v	spectral	0.993140952140137
hhp03_vowel.txt	27	B2	L	v	spectral	0.970103193756156
hhp03_vowel.txt	28	B2	L	v	spectral	0.957318885171335
hhp03_vowel.txt	29	B2	L	v	spectral	0.921979033722525
hhp03_vowel.txt	30	B2	L	v	spectral	1.01995034280383
hhp03_vowel.txt	31	B2	L	v	spectral	1.05281074060499
hhp03_vowel.txt	32	B2	L	v	spectral	0.941645813080954
hhp03_vowel.txt	33	B2	L	v	spectral	0.948965220864171
hhp03_vowel.txt	34	B2	L	v	spectral	NA
hhp03_vowel.txt	35	B2	L	v	spectral	0.992890418548316
hhp03_vowel.txt	36	B2	L	v	spectral	0.980465643883605
hhp03_vowel.txt	37	B2	L	v	spectral	0.987456805631699
hhp03_vowel.txt	38	B2	L	v	spectral	1.01268729167887
hhp03_vowel.txt	39	B2	L	v	spectral	0.894813849735748
hhp03_vowel.txt	40	B2	L	v	spectral	0.966861423155643
hhp03_vowel.txt	41	B3	L	v	spectral	1.00011786474049
hhp03_vowel.txt	42	B3	L	v	spectral	0.922274541556768
hhp03_vowel.txt	43	B3	L	v	spectral	0.975296423959921
hhp03_vowel.txt	44	B3	L	v	spectral	0.970281183374646
hhp03_vowel.txt	45	B3	L	v	spectral	0.953577551130661
hhp03_vowel.txt	46	B3	L	v	spectral	0.935496532291678
hhp03_vowel.txt	47	B3	L	v	spectral	0.993075751419806
hhp03_vowel.txt	48	B3	L	v	spectral	0.936838658419124
hhp03_vowel.txt	49	B3	L	v	spectral	0.976705437014727
hhp03_vowel.txt	50	B3	L	v	spectral	0.986250228211346
hhp03_vowel.txt	51	B3	L	v	spectral	0.900504672944489
hhp03_vowel.txt	52	B3	L	v	spectral	0.932029171837308
hhp03_vowel.txt	53	B3	L	v	spectral	NA
hhp03_vowel.txt	54	B3	L	v	spectral	0.954502201936929
hhp03_vowel.txt	55	B3	L	v	spectral	0.946832164839853
hhp03_vowel.txt	56	B3	L	v	spectral	0.978238373685194
hhp03_vowel.txt	57	B3	L	v	spectral	0.942316836481532
hhp03_vowel.txt	58	B3	L	v	spectral	0.973290039501659
hhp03_vowel.txt	59	B3	L	v	spectral	0.920678521077149
hhp03_vowel.txt	60	B3	L	v	spectral	NA
hhp03_vowel.txt	61	B4	L	v	spectral	0.964339292986917
hhp03_vowel.txt	62	B4	L	v	spectral	0.982291547493032
hhp03_vowel.txt	63	B4	L	v	spectral	0.930352842564491
hhp03_vowel.txt	64	B4	L	v	spectral	1.01572799123066
hhp03_vowel.txt	65	B4	L	v	spectral	0.90753675551311
hhp03_vowel.txt	66	B4	L	v	spectral	0.967710877925508
hhp03_vowel.txt	67	B4	L	v	spectral	0.961413369096711
hhp03_vowel.txt	68	B4	L	v	spectral	NA
hhp03_vowel.txt	69	B4	L	v	spectral	0.975440255286457
hhp03_vowel.txt	70	B4	L	v	spectral	0.957666047786962
hhp03_vowel.txt	71	B4	L	v	spectral	0.989722159499893
hhp03_vowel.txt	72	B4	L	v	spectral	0.947840431545803
hhp03_vowel.txt	73	B4	L	v	spectral	0.91098829327138
hhp03_vowel.txt	74	B4	L	v	spectral	0.967029485957193
hhp03_vowel.txt	75	B4	L	v	spectral	0.95137386627746
hhp03_vowel.txt	76	B4	L	v	spectral	1.00381473654481
hhp03_vowel.txt	77	B4	L	v	spectral	0.968313593708217
hhp03_vowel.txt	78	B4	L	v	spectral	0.970651428747556
hhp03_vowel.txt	80	B4	L	v	spectral	0.991663660212632
hhp03_vowel.txt	81	B5	L	v	spectral	0.912108450721307
hhp03_vowel.txt	82	B5	L	v	spectral	0.950077135805244
hhp03_vowel.txt	83	B5	L	v	spectral	1.02904693765763
hhp03_vowel.txt	84	B5	L	v	spectral	0.927100644534965
hhp03_vowel.txt	85	B5	L	v	spectral	1.02470489506399
hhp03_vowel.txt	86	B5	L	v	spectral	1.01850930145172
hhp03_vowel.txt	87	B5	L	v	spectral	1.03384718845157
hhp03_vowel.txt	88	B5	L	v	spectral	1.01308401015899
hhp03_vowel.txt	89	B5	L	v	spectral	0.961680161568936
hhp03_vowel.txt	90	B5	L	v	spectral	0.993200619494668
hhp03_vowel.txt	91	B5	L	v	spectral	1.052660391456
hhp03_vowel.txt	92	B5	L	v	spectral	1.01529478141291
hhp03_vowel.txt	93	B5	L	v	spectral	1.01455477769234
hhp03_vowel.txt	94	B5	L	v	spectral	0.982492556514879
hhp03_vowel.txt	95	B5	L	v	spectral	0.961921915566318
hhp03_vowel.txt	96	B5	L	v	spectral	1.05416734029171
hhp03_vowel.txt	97	B5	L	v	spectral	0.964625435557533
hhp03_vowel.txt	98	B5	L	v	spectral	1.0696299304491
hhp03_vowel.txt	99	B5	L	v	spectral	0.963826404148893
hhp03_vowel.txt	100	B5	L	v	spectral	1.02628350089684
kmb11_vowel.txt	1	B1	R	v	spectral	0.976514070619981
kmb11_vowel.txt	2	B1	R	v	spectral	0.992572290336723
kmb11_vowel.txt	3	B1	R	v	spectral	1.02182561835863
kmb11_vowel.txt	4	B1	R	v	spectral	0.993536702205977
kmb11_vowel.txt	5	B1	R	v	spectral	0.985900594539799
kmb11_vowel.txt	6	B1	R	v	spectral	0.989403001480274
kmb11_vowel.txt	7	B1	R	v	spectral	1.02666261198474
kmb11_vowel.txt	8	B1	R	v	spectral	0.987183025320702
kmb11_vowel.txt	9	B1	R	v	spectral	1.01974194188793
kmb11_vowel.txt	10	B1	R	v	spectral	1.01104102191396
kmb11_vowel.txt	11	B1	R	v	spectral	1.02840940773011
kmb11_vowel.txt	12	B1	R	v	spectral	0.971685842919178
kmb11_vowel.txt	13	B1	R	v	spectral	0.986175283876944
kmb11_vowel.txt	14	B1	R	v	spectral	1.01613255538381
kmb11_vowel.txt	15	B1	R	v	spectral	1.03973534367745
kmb11_vowel.txt	16	B1	R	v	spectral	0.969114981585436
kmb11_vowel.txt	17	B1	R	v	spectral	1.02053077293153
kmb11_vowel.txt	18	B1	R	v	spectral	0.985098534610987
kmb11_vowel.txt	19	B1	R	v	spectral	0.96859556060326
kmb11_vowel.txt	20	B1	R	v	spectral	1.01014083803258
kmb11_vowel.txt	21	B2	R	v	spectral	0.938433068448857
kmb11_vowel.txt	22	B2	R	v	spectral	1.0126224757083
kmb11_vowel.txt	23	B2	R	v	spectral	1.00744979552537
kmb11_vowel.txt	24	B2	R	v	spectral	1.01651230949376
kmb11_vowel.txt	25	B2	R	v	spectral	1.00896073179337
kmb11_vowel.txt	26	B2	R	v	spectral	1.0223243311927
kmb11_vowel.txt	27	B2	R	v	spectral	0.982830509298459
kmb11_vowel.txt	29	B2	R	v	spectral	0.958451962233163
kmb11_vowel.txt	30	B2	R	v	spectral	0.943924151104082
kmb11_vowel.txt	31	B2	R	v	spectral	0.963969230380542
kmb11_vowel.txt	32	B2	R	v	spectral	0.989266134983276
kmb11_vowel.txt	33	B2	R	v	spectral	1.0142621150176
kmb11_vowel.txt	34	B2	R	v	spectral	1.01205369506232
kmb11_vowel.txt	35	B2	R	v	spectral	1.03169926321903
kmb11_vowel.txt	36	B2	R	v	spectral	NA
kmb11_vowel.txt	37	B2	R	v	spectral	0.952582984126636
kmb11_vowel.txt	38	B2	R	v	spectral	0.950110498987232
kmb11_vowel.txt	39	B2	R	v	spectral	0.968506559217805
kmb11_vowel.txt	40	B2	R	v	spectral	0.964132495477849
kmb11_vowel.txt	41	B3	R	v	spectral	1.04337105082415
kmb11_vowel.txt	42	B3	R	v	spectral	1.02036305988519
kmb11_vowel.txt	43	B3	R	v	spectral	1.05630087675299
kmb11_vowel.txt	44	B3	R	v	spectral	1.05411548388575
kmb11_vowel.txt	45	B3	R	v	spectral	1.05311735873143
kmb11_vowel.txt	46	B3	R	v	spectral	1.04013404467086
kmb11_vowel.txt	47	B3	R	v	spectral	1.03486705679593
kmb11_vowel.txt	48	B3	R	v	spectral	1.02962481021032
kmb11_vowel.txt	49	B3	R	v	spectral	0.951964655195044
kmb11_vowel.txt	50	B3	R	v	spectral	1.00991867501532
kmb11_vowel.txt	51	B3	R	v	spectral	0.963179386324513
kmb11_vowel.txt	52	B3	R	v	spectral	1.02765385486938
kmb11_vowel.txt	53	B3	R	v	spectral	1.0025189952178
kmb11_vowel.txt	54	B3	R	v	spectral	1.02617676127039
kmb11_vowel.txt	55	B3	R	v	spectral	1.00927151836594
kmb11_vowel.txt	56	B3	R	v	spectral	1.02036541419634
kmb11_vowel.txt	57	B3	R	v	spectral	1.00885686768311
kmb11_vowel.txt	58	B3	R	v	spectral	0.963577392589144
kmb11_vowel.txt	59	B3	R	v	spectral	0.96959281914635
kmb11_vowel.txt	60	B3	R	v	spectral	0.97383915722907
kmb11_vowel.txt	61	B4	R	v	spectral	1.00131401460266
kmb11_vowel.txt	62	B4	R	v	spectral	0.899109326742939
kmb11_vowel.txt	63	B4	R	v	spectral	0.922971420324464
kmb11_vowel.txt	64	B4	R	v	spectral	1.00896932825214
kmb11_vowel.txt	65	B4	R	v	spectral	0.969336626528685
kmb11_vowel.txt	66	B4	R	v	spectral	1.00814876594859
kmb11_vowel.txt	67	B4	R	v	spectral	1.00202886291037
kmb11_vowel.txt	68	B4	R	v	spectral	1.05452317599706
kmb11_vowel.txt	69	B4	R	v	spectral	1.01200729125708
kmb11_vowel.txt	70	B4	R	v	spectral	1.03986268737502
kmb11_vowel.txt	71	B4	R	v	spectral	0.983941916832936
kmb11_vowel.txt	72	B4	R	v	spectral	1.06743414913448
kmb11_vowel.txt	73	B4	R	v	spectral	0.919137814093641
kmb11_vowel.txt	75	B4	R	v	spectral	1.06712580407374
kmb11_vowel.txt	76	B4	R	v	spectral	0.979841068072002
kmb11_vowel.txt	77	B4	R	v	spectral	0.964320840637338
kmb11_vowel.txt	78	B4	R	v	spectral	1.00742563820878
kmb11_vowel.txt	79	B4	R	v	spectral	0.952686726217881
kmb11_vowel.txt	80	B4	R	v	spectral	0.951008014637366
kmb11_vowel.txt	81	B5	R	v	spectral	0.946691547619926
kmb11_vowel.txt	82	B5	R	v	spectral	0.94890138790544
kmb11_vowel.txt	83	B5	R	v	spectral	0.992084752556811
kmb11_vowel.txt	84	B5	R	v	spectral	0.964847835411168
kmb11_vowel.txt	85	B5	R	v	spectral	0.990389572886392
kmb11_vowel.txt	86	B5	R	v	spectral	0.950388376861257
kmb11_vowel.txt	87	B5	R	v	spectral	1.00922941940653
kmb11_vowel.txt	88	B5	R	v	spectral	0.996887265690351
kmb11_vowel.txt	89	B5	R	v	spectral	1.04169393404269
kmb11_vowel.txt	90	B5	R	v	spectral	1.06515395082884
kmb11_vowel.txt	91	B5	R	v	spectral	0.940203543897832
kmb11_vowel.txt	92	B5	R	v	spectral	1.06243783989241
kmb11_vowel.txt	93	B5	R	v	spectral	0.948904393081519
kmb11_vowel.txt	94	B5	R	v	spectral	0.975553520182277
kmb11_vowel.txt	95	B5	R	v	spectral	0.965934299567266
kmb11_vowel.txt	96	B5	R	v	spectral	1.03133888882399
kmb11_vowel.txt	97	B5	R	v	spectral	1.03169106117492
kmb11_vowel.txt	98	B5	R	v	spectral	1.02539928394135
kmb11_vowel.txt	99	B5	R	v	spectral	0.997943848071133
kmb11_vowel.txt	100	B5	R	v	spectral	1.0629395732387
kmb11_vowel.txt	1	B1	L	v	spectral	1.00305225558398
kmb11_vowel.txt	2	B1	L	v	spectral	1.0044975193063
kmb11_vowel.txt	3	B1	L	v	spectral	0.998150411418558
kmb11_vowel.txt	4	B1	L	v	spectral	1.00951347900648
kmb11_vowel.txt	5	B1	L	v	spectral	0.957819528968392
kmb11_vowel.txt	6	B1	L	v	spectral	1.02035017022573
kmb11_vowel.txt	7	B1	L	v	spectral	1.04082179145103
kmb11_vowel.txt	8	B1	L	v	spectral	1.01743175603809
kmb11_vowel.txt	9	B1	L	v	spectral	0.996433205860485
kmb11_vowel.txt	10	B1	L	v	spectral	0.966871788810404
kmb11_vowel.txt	11	B1	L	v	spectral	1.01772877867741
kmb11_vowel.txt	12	B1	L	v	spectral	0.996626887167708
kmb11_vowel.txt	13	B1	L	v	spectral	1.00588304730813
kmb11_vowel.txt	14	B1	L	v	spectral	1.01727440169817
kmb11_vowel.txt	15	B1	L	v	spectral	1.04905041871184
kmb11_vowel.txt	16	B1	L	v	spectral	0.990968995197917
kmb11_vowel.txt	17	B1	L	v	spectral	NA
kmb11_vowel.txt	18	B1	L	v	spectral	0.947033034331064
kmb11_vowel.txt	19	B1	L	v	spectral	0.967350371608155
kmb11_vowel.txt	20	B1	L	v	spectral	0.993142158630153
kmb11_vowel.txt	21	B2	L	v	spectral	0.934358910146294
kmb11_vowel.txt	22	B2	L	v	spectral	0.991150641497205
kmb11_vowel.txt	23	B2	L	v	spectral	0.99337119178663
kmb11_vowel.txt	24	B2	L	v	spectral	1.05212785694565
kmb11_vowel.txt	25	B2	L	v	spectral	1.04199104251104
kmb11_vowel.txt	26	B2	L	v	spectral	0.929647016879863
kmb11_vowel.txt	27	B2	L	v	spectral	1.03250768468533
kmb11_vowel.txt	28	B2	L	v	spectral	0.978172263372927
kmb11_vowel.txt	29	B2	L	v	spectral	0.983752192828488
kmb11_vowel.txt	30	B2	L	v	spectral	1.00066366335837
kmb11_vowel.txt	31	B2	L	v	spectral	1.01127533084501
kmb11_vowel.txt	32	B2	L	v	spectral	0.977165800693717
kmb11_vowel.txt	33	B2	L	v	spectral	1.00474823838415
kmb11_vowel.txt	34	B2	L	v	spectral	1.01247816738009
kmb11_vowel.txt	35	B2	L	v	spectral	0.954369937900344
kmb11_vowel.txt	36	B2	L	v	spectral	0.927033674110219
kmb11_vowel.txt	37	B2	L	v	spectral	0.964794593343559
kmb11_vowel.txt	38	B2	L	v	spectral	0.942806743206584
kmb11_vowel.txt	39	B2	L	v	spectral	0.913272444821536
kmb11_vowel.txt	40	B2	L	v	spectral	0.931635119277321
kmb11_vowel.txt	41	B3	L	v	spectral	0.992007203407699
kmb11_vowel.txt	42	B3	L	v	spectral	1.04270420272107
kmb11_vowel.txt	43	B3	L	v	spectral	1.0353750059762
kmb11_vowel.txt	44	B3	L	v	spectral	1.06600768611126
kmb11_vowel.txt	45	B3	L	v	spectral	1.0366988079866
kmb11_vowel.txt	46	B3	L	v	spectral	1.00092321466962
kmb11_vowel.txt	47	B3	L	v	spectral	1.01285452718503
kmb11_vowel.txt	48	B3	L	v	spectral	1.03853361922122
kmb11_vowel.txt	49	B3	L	v	spectral	1.03221031570101
kmb11_vowel.txt	50	B3	L	v	spectral	0.976860253286865
kmb11_vowel.txt	51	B3	L	v	spectral	1.04648378468942
kmb11_vowel.txt	52	B3	L	v	spectral	1.03781690777509
kmb11_vowel.txt	53	B3	L	v	spectral	1.03936417581576
kmb11_vowel.txt	54	B3	L	v	spectral	0.962096848667869
kmb11_vowel.txt	55	B3	L	v	spectral	1.05106712023636
kmb11_vowel.txt	56	B3	L	v	spectral	1.0438796966312
kmb11_vowel.txt	57	B3	L	v	spectral	0.960587189143085
kmb11_vowel.txt	58	B3	L	v	spectral	1.00567903441173
kmb11_vowel.txt	59	B3	L	v	spectral	0.986375726902791
kmb11_vowel.txt	60	B3	L	v	spectral	0.972176268374649
kmb11_vowel.txt	61	B4	L	v	spectral	NA
kmb11_vowel.txt	62	B4	L	v	spectral	0.983266438441342
kmb11_vowel.txt	63	B4	L	v	spectral	1.03324238608832
kmb11_vowel.txt	64	B4	L	v	spectral	0.984322165154204
kmb11_vowel.txt	65	B4	L	v	spectral	1.00441878639127
kmb11_vowel.txt	66	B4	L	v	spectral	1.03010960922259
kmb11_vowel.txt	67	B4	L	v	spectral	1.01415109709664
kmb11_vowel.txt	68	B4	L	v	spectral	1.0501003484188
kmb11_vowel.txt	69	B4	L	v	spectral	1.01935039184106
kmb11_vowel.txt	70	B4	L	v	spectral	1.07192252472594
kmb11_vowel.txt	71	B4	L	v	spectral	1.05315692772152
kmb11_vowel.txt	72	B4	L	v	spectral	1.01152187133282
kmb11_vowel.txt	73	B4	L	v	spectral	1.02780755112139
kmb11_vowel.txt	74	B4	L	v	spectral	1.03617087043218
kmb11_vowel.txt	75	B4	L	v	spectral	1.02489610767896
kmb11_vowel.txt	76	B4	L	v	spectral	0.958537223050487
kmb11_vowel.txt	77	B4	L	v	spectral	0.982450971931229
kmb11_vowel.txt	78	B4	L	v	spectral	0.999166491680913
kmb11_vowel.txt	79	B4	L	v	spectral	0.963964224370596
kmb11_vowel.txt	80	B4	L	v	spectral	0.965405778550495
kmb11_vowel.txt	81	B5	L	v	spectral	0.962292982713957
kmb11_vowel.txt	82	B5	L	v	spectral	0.992386471033809
kmb11_vowel.txt	83	B5	L	v	spectral	0.952242086615674
kmb11_vowel.txt	84	B5	L	v	spectral	0.971429901376163
kmb11_vowel.txt	85	B5	L	v	spectral	0.947088794633305
kmb11_vowel.txt	86	B5	L	v	spectral	0.968294642599853
kmb11_vowel.txt	87	B5	L	v	spectral	0.955892752558307
kmb11_vowel.txt	88	B5	L	v	spectral	0.964868738581401
kmb11_vowel.txt	89	B5	L	v	spectral	0.948213291239331
kmb11_vowel.txt	90	B5	L	v	spectral	0.953535022995638
kmb11_vowel.txt	91	B5	L	v	spectral	0.940436067596213
kmb11_vowel.txt	92	B5	L	v	spectral	0.982854346054297
kmb11_vowel.txt	93	B5	L	v	spectral	1.02583737639697
kmb11_vowel.txt	94	B5	L	v	spectral	0.987631797491252
kmb11_vowel.txt	95	B5	L	v	spectral	0.992626974901777
kmb11_vowel.txt	96	B5	L	v	spectral	0.972774375646567
kmb11_vowel.txt	97	B5	L	v	spectral	0.982236393145353
kmb11_vowel.txt	98	B5	L	v	spectral	1.01070628007752
kmb11_vowel.txt	99	B5	L	v	spectral	1.04287349940091
kmb11_vowel.txt	100	B5	L	v	spectral	NA
kra13_vowel.txt	1	B1	R	v	spectral	0.983624586883789
kra13_vowel.txt	2	B1	R	v	spectral	1.02886368832018
kra13_vowel.txt	3	B1	R	v	spectral	1.01086978244834
kra13_vowel.txt	4	B1	R	v	spectral	1.01920958001172
kra13_vowel.txt	5	B1	R	v	spectral	1.01813958339511
kra13_vowel.txt	6	B1	R	v	spectral	1.02398817536814
kra13_vowel.txt	7	B1	R	v	spectral	NA
kra13_vowel.txt	8	B1	R	v	spectral	0.981541943834221
kra13_vowel.txt	9	B1	R	v	spectral	0.983868620372621
kra13_vowel.txt	10	B1	R	v	spectral	1.03209815995355
kra13_vowel.txt	11	B1	R	v	spectral	0.957114150973157
kra13_vowel.txt	12	B1	R	v	spectral	NA
kra13_vowel.txt	13	B1	R	v	spectral	0.965036615664699
kra13_vowel.txt	14	B1	R	v	spectral	0.986908273299462
kra13_vowel.txt	15	B1	R	v	spectral	0.99194518666871
kra13_vowel.txt	16	B1	R	v	spectral	NA
kra13_vowel.txt	17	B1	R	v	spectral	1.032999980396
kra13_vowel.txt	18	B1	R	v	spectral	1.00563075591886
kra13_vowel.txt	19	B1	R	v	spectral	1.01756197010555
kra13_vowel.txt	20	B1	R	v	spectral	0.960598946385891
kra13_vowel.txt	21	B2	R	v	spectral	0.969325747092632
kra13_vowel.txt	22	B2	R	v	spectral	NA
kra13_vowel.txt	23	B2	R	v	spectral	0.778901556893071
kra13_vowel.txt	24	B2	R	v	spectral	0.82427879328895
kra13_vowel.txt	25	B2	R	v	spectral	0.874040164691757
kra13_vowel.txt	26	B2	R	v	spectral	0.850070248233039
kra13_vowel.txt	27	B2	R	v	spectral	0.969150479214871
kra13_vowel.txt	28	B2	R	v	spectral	0.823809144394823
kra13_vowel.txt	29	B2	R	v	spectral	0.878778146520368
kra13_vowel.txt	30	B2	R	v	spectral	0.811479415716853
kra13_vowel.txt	31	B2	R	v	spectral	0.882616311581604
kra13_vowel.txt	32	B2	R	v	spectral	0.835370395336931
kra13_vowel.txt	33	B2	R	v	spectral	0.880495949496621
kra13_vowel.txt	34	B2	R	v	spectral	0.932049071558127
kra13_vowel.txt	35	B2	R	v	spectral	0.885913754469582
kra13_vowel.txt	36	B2	R	v	spectral	0.79581886137022
kra13_vowel.txt	37	B2	R	v	spectral	0.888539331029725
kra13_vowel.txt	38	B2	R	v	spectral	0.828526600471318
kra13_vowel.txt	39	B2	R	v	spectral	0.76686108321049
kra13_vowel.txt	40	B2	R	v	spectral	0.853151120160138
kra13_vowel.txt	41	B3	R	v	spectral	0.943560802013011
kra13_vowel.txt	42	B3	R	v	spectral	0.895336338840733
kra13_vowel.txt	43	B3	R	v	spectral	0.878118406539798
kra13_vowel.txt	44	B3	R	v	spectral	0.885494908972716
kra13_vowel.txt	45	B3	R	v	spectral	0.780924517244074
kra13_vowel.txt	46	B3	R	v	spectral	0.924312930194759
kra13_vowel.txt	47	B3	R	v	spectral	0.909290030482782
kra13_vowel.txt	48	B3	R	v	spectral	0.899684331807544
kra13_vowel.txt	49	B3	R	v	spectral	0.910341174586139
kra13_vowel.txt	50	B3	R	v	spectral	0.782104550915993
kra13_vowel.txt	51	B3	R	v	spectral	0.792840198759514
kra13_vowel.txt	52	B3	R	v	spectral	0.805013462293731
kra13_vowel.txt	53	B3	R	v	spectral	0.814777479981433
kra13_vowel.txt	54	B3	R	v	spectral	0.849675510987834
kra13_vowel.txt	55	B3	R	v	spectral	0.960568572156
kra13_vowel.txt	56	B3	R	v	spectral	0.8549950922443
kra13_vowel.txt	57	B3	R	v	spectral	0.921788376765938
kra13_vowel.txt	58	B3	R	v	spectral	0.866878308991907
kra13_vowel.txt	59	B3	R	v	spectral	0.85055666477232
kra13_vowel.txt	60	B3	R	v	spectral	0.839847858748818
kra13_vowel.txt	61	B4	R	v	spectral	0.95629811136115
kra13_vowel.txt	62	B4	R	v	spectral	0.874517497715941
kra13_vowel.txt	63	B4	R	v	spectral	0.836649204512406
kra13_vowel.txt	64	B4	R	v	spectral	0.882514390659559
kra13_vowel.txt	65	B4	R	v	spectral	0.944700874809136
kra13_vowel.txt	66	B4	R	v	spectral	0.86377787250366
kra13_vowel.txt	67	B4	R	v	spectral	0.881542073454372
kra13_vowel.txt	68	B4	R	v	spectral	0.825132640702902
kra13_vowel.txt	69	B4	R	v	spectral	0.882084789879975
kra13_vowel.txt	70	B4	R	v	spectral	0.96766975664565
kra13_vowel.txt	71	B4	R	v	spectral	0.943498411252314
kra13_vowel.txt	72	B4	R	v	spectral	0.939108917835949
kra13_vowel.txt	73	B4	R	v	spectral	0.894413047473562
kra13_vowel.txt	74	B4	R	v	spectral	0.928326927505957
kra13_vowel.txt	75	B4	R	v	spectral	0.975813084402618
kra13_vowel.txt	76	B4	R	v	spectral	0.90368208814564
kra13_vowel.txt	77	B4	R	v	spectral	0.809030474158756
kra13_vowel.txt	78	B4	R	v	spectral	0.967500444912694
kra13_vowel.txt	79	B4	R	v	spectral	0.847500489209336
kra13_vowel.txt	80	B4	R	v	spectral	0.915357414543322
kra13_vowel.txt	81	B5	R	v	spectral	0.976058302665703
kra13_vowel.txt	82	B5	R	v	spectral	NA
kra13_vowel.txt	83	B5	R	v	spectral	0.957908700009754
kra13_vowel.txt	84	B5	R	v	spectral	0.879356314501056
kra13_vowel.txt	85	B5	R	v	spectral	0.905394481792912
kra13_vowel.txt	86	B5	R	v	spectral	0.844873252113265
kra13_vowel.txt	87	B5	R	v	spectral	0.896053420707669
kra13_vowel.txt	88	B5	R	v	spectral	0.972179058477192
kra13_vowel.txt	89	B5	R	v	spectral	0.898287552861851
kra13_vowel.txt	90	B5	R	v	spectral	0.927420822506031
kra13_vowel.txt	91	B5	R	v	spectral	0.938539973966527
kra13_vowel.txt	92	B5	R	v	spectral	0.945533622497305
kra13_vowel.txt	93	B5	R	v	spectral	0.985097465037839
kra13_vowel.txt	94	B5	R	v	spectral	0.944587525256355
kra13_vowel.txt	95	B5	R	v	spectral	1.00491776937196
kra13_vowel.txt	96	B5	R	v	spectral	0.902212125850714
kra13_vowel.txt	97	B5	R	v	spectral	0.969270481537434
kra13_vowel.txt	98	B5	R	v	spectral	0.95041603504952
kra13_vowel.txt	99	B5	R	v	spectral	0.931335919045039
kra13_vowel.txt	100	B5	R	v	spectral	0.938201859686603
kra13_vowel.txt	1	B1	L	v	spectral	NA
kra13_vowel.txt	2	B1	L	v	spectral	0.928662130293245
kra13_vowel.txt	3	B1	L	v	spectral	1.01846637224084
kra13_vowel.txt	4	B1	L	v	spectral	1.01712790814523
kra13_vowel.txt	5	B1	L	v	spectral	0.989353266426377
kra13_vowel.txt	6	B1	L	v	spectral	1.01751404470974
kra13_vowel.txt	7	B1	L	v	spectral	1.00566372528341
kra13_vowel.txt	8	B1	L	v	spectral	0.998299304881472
kra13_vowel.txt	9	B1	L	v	spectral	0.95505034876259
kra13_vowel.txt	10	B1	L	v	spectral	1.02762759363936
kra13_vowel.txt	11	B1	L	v	spectral	1.03262973886472
kra13_vowel.txt	12	B1	L	v	spectral	0.935416582711768
kra13_vowel.txt	13	B1	L	v	spectral	0.984548034373141
kra13_vowel.txt	14	B1	L	v	spectral	0.965318937020126
kra13_vowel.txt	15	B1	L	v	spectral	0.995687738363423
kra13_vowel.txt	16	B1	L	v	spectral	1.00883798121451
kra13_vowel.txt	17	B1	L	v	spectral	1.02741039026965
kra13_vowel.txt	18	B1	L	v	spectral	1.00534999526725
kra13_vowel.txt	19	B1	L	v	spectral	1.04672712963634
kra13_vowel.txt	20	B1	L	v	spectral	1.04030877789681
kra13_vowel.txt	21	B2	L	v	spectral	0.888538751397098
kra13_vowel.txt	22	B2	L	v	spectral	0.936680757739965
kra13_vowel.txt	23	B2	L	v	spectral	0.879407952689361
kra13_vowel.txt	24	B2	L	v	spectral	0.979796089700178
kra13_vowel.txt	25	B2	L	v	spectral	0.965708043707715
kra13_vowel.txt	26	B2	L	v	spectral	0.929399673929304
kra13_vowel.txt	27	B2	L	v	spectral	0.875754976775217
kra13_vowel.txt	28	B2	L	v	spectral	0.84694595333688
kra13_vowel.txt	29	B2	L	v	spectral	0.78604817508109
kra13_vowel.txt	30	B2	L	v	spectral	0.787769107263257
kra13_vowel.txt	31	B2	L	v	spectral	0.864931848451635
kra13_vowel.txt	32	B2	L	v	spectral	0.866990554489613
kra13_vowel.txt	33	B2	L	v	spectral	0.781166024668481
kra13_vowel.txt	34	B2	L	v	spectral	0.766028607275391
kra13_vowel.txt	35	B2	L	v	spectral	0.857935641288333
kra13_vowel.txt	36	B2	L	v	spectral	0.904808369652633
kra13_vowel.txt	37	B2	L	v	spectral	0.88838905974841
kra13_vowel.txt	38	B2	L	v	spectral	0.76010751725003
kra13_vowel.txt	39	B2	L	v	spectral	0.827687941187255
kra13_vowel.txt	40	B2	L	v	spectral	0.899058350917268
kra13_vowel.txt	41	B3	L	v	spectral	0.939615577532663
kra13_vowel.txt	42	B3	L	v	spectral	0.850747592377427
kra13_vowel.txt	43	B3	L	v	spectral	0.982809295422798
kra13_vowel.txt	44	B3	L	v	spectral	0.973505435150507
kra13_vowel.txt	45	B3	L	v	spectral	0.949623568867207
kra13_vowel.txt	46	B3	L	v	spectral	0.953286175281982
kra13_vowel.txt	47	B3	L	v	spectral	0.915726789236716
kra13_vowel.txt	48	B3	L	v	spectral	0.845321266797708
kra13_vowel.txt	49	B3	L	v	spectral	0.902560222525336
kra13_vowel.txt	50	B3	L	v	spectral	0.896106455501825
kra13_vowel.txt	51	B3	L	v	spectral	0.856752560415561
kra13_vowel.txt	52	B3	L	v	spectral	0.90613977645951
kra13_vowel.txt	53	B3	L	v	spectral	0.906929843006745
kra13_vowel.txt	54	B3	L	v	spectral	0.862232658075834
kra13_vowel.txt	55	B3	L	v	spectral	0.945110053899007
kra13_vowel.txt	56	B3	L	v	spectral	0.787138617468138
kra13_vowel.txt	57	B3	L	v	spectral	0.776398869598918
kra13_vowel.txt	58	B3	L	v	spectral	0.868018312556307
kra13_vowel.txt	59	B3	L	v	spectral	0.823497039863977
kra13_vowel.txt	60	B3	L	v	spectral	0.890228522619383
kra13_vowel.txt	61	B4	L	v	spectral	0.871165195928602
kra13_vowel.txt	62	B4	L	v	spectral	0.906781740710595
kra13_vowel.txt	63	B4	L	v	spectral	0.870740408383498
kra13_vowel.txt	64	B4	L	v	spectral	0.849626384909641
kra13_vowel.txt	65	B4	L	v	spectral	0.902351357452922
kra13_vowel.txt	66	B4	L	v	spectral	0.882453229465349
kra13_vowel.txt	67	B4	L	v	spectral	0.882902185572342
kra13_vowel.txt	68	B4	L	v	spectral	0.834401398869254
kra13_vowel.txt	69	B4	L	v	spectral	0.858620546334534
kra13_vowel.txt	70	B4	L	v	spectral	0.826131358655263
kra13_vowel.txt	71	B4	L	v	spectral	0.901982744226345
kra13_vowel.txt	72	B4	L	v	spectral	0.988460135247259
kra13_vowel.txt	73	B4	L	v	spectral	0.937072104760604
kra13_vowel.txt	74	B4	L	v	spectral	0.942327396090381
kra13_vowel.txt	75	B4	L	v	spectral	0.946045956934605
kra13_vowel.txt	76	B4	L	v	spectral	0.924934502918166
kra13_vowel.txt	77	B4	L	v	spectral	0.929389640568411
kra13_vowel.txt	78	B4	L	v	spectral	0.9145129459061
kra13_vowel.txt	79	B4	L	v	spectral	0.97217142225846
kra13_vowel.txt	80	B4	L	v	spectral	NA
kra13_vowel.txt	81	B5	L	v	spectral	0.975670617586575
kra13_vowel.txt	82	B5	L	v	spectral	0.966706911199757
kra13_vowel.txt	83	B5	L	v	spectral	0.94694395156191
kra13_vowel.txt	84	B5	L	v	spectral	0.989172441247566
kra13_vowel.txt	85	B5	L	v	spectral	0.989578441060369
kra13_vowel.txt	86	B5	L	v	spectral	0.922191906150542
kra13_vowel.txt	87	B5	L	v	spectral	0.977845853914688
kra13_vowel.txt	88	B5	L	v	spectral	0.920819146940135
kra13_vowel.txt	89	B5	L	v	spectral	1.00695493148417
kra13_vowel.txt	90	B5	L	v	spectral	0.987751649502782
kra13_vowel.txt	91	B5	L	v	spectral	0.933615510403585
kra13_vowel.txt	92	B5	L	v	spectral	0.914440330843639
kra13_vowel.txt	93	B5	L	v	spectral	0.908047015728103
kra13_vowel.txt	94	B5	L	v	spectral	0.929968845796587
kra13_vowel.txt	95	B5	L	v	spectral	0.941864324284685
kra13_vowel.txt	96	B5	L	v	spectral	0.947170379898904
kra13_vowel.txt	97	B5	L	v	spectral	0.984041650059177
kra13_vowel.txt	98	B5	L	v	spectral	0.943533948387805
kra13_vowel.txt	99	B5	L	v	spectral	0.887440726889311
kra13_vowel.txt	100	B5	L	v	spectral	0.971008136444654
mha30_vowel.txt	1	B1	R	v	spectral	1.03622679163854
mha30_vowel.txt	2	B1	R	v	spectral	1.01740704467465
mha30_vowel.txt	3	B1	R	v	spectral	0.927403755816122
mha30_vowel.txt	4	B1	R	v	spectral	1.03662582477517
mha30_vowel.txt	5	B1	R	v	spectral	0.961666965708844
mha30_vowel.txt	6	B1	R	v	spectral	0.965582605526911
mha30_vowel.txt	7	B1	R	v	spectral	1.03175249424818
mha30_vowel.txt	8	B1	R	v	spectral	0.992142813851986
mha30_vowel.txt	9	B1	R	v	spectral	1.00992634638758
mha30_vowel.txt	10	B1	R	v	spectral	1.00938195545712
mha30_vowel.txt	11	B1	R	v	spectral	0.951736236164713
mha30_vowel.txt	12	B1	R	v	spectral	0.934814994525233
mha30_vowel.txt	13	B1	R	v	spectral	1.00238126228269
mha30_vowel.txt	14	B1	R	v	spectral	0.997566831557175
mha30_vowel.txt	15	B1	R	v	spectral	0.998079487883183
mha30_vowel.txt	16	B1	R	v	spectral	0.974788538596366
mha30_vowel.txt	17	B1	R	v	spectral	1.05638847254215
mha30_vowel.txt	18	B1	R	v	spectral	1.05437062975414
mha30_vowel.txt	19	B1	R	v	spectral	0.991418466568388
mha30_vowel.txt	20	B1	R	v	spectral	1.05033848204084
mha30_vowel.txt	21	B2	R	v	spectral	1.01746214139453
mha30_vowel.txt	22	B2	R	v	spectral	1.005526076401
mha30_vowel.txt	23	B2	R	v	spectral	0.963612204238359
mha30_vowel.txt	24	B2	R	v	spectral	0.938673313183312
mha30_vowel.txt	25	B2	R	v	spectral	0.985366161777938
mha30_vowel.txt	26	B2	R	v	spectral	1.01244410549289
mha30_vowel.txt	27	B2	R	v	spectral	0.977180928159774
mha30_vowel.txt	28	B2	R	v	spectral	1.03762366031857
mha30_vowel.txt	29	B2	R	v	spectral	0.954563933663292
mha30_vowel.txt	30	B2	R	v	spectral	1.04050578067676
mha30_vowel.txt	31	B2	R	v	spectral	1.07244671724944
mha30_vowel.txt	32	B2	R	v	spectral	1.07542358459922
mha30_vowel.txt	33	B2	R	v	spectral	1.09281694891101
mha30_vowel.txt	34	B2	R	v	spectral	1.0077976872025
mha30_vowel.txt	35	B2	R	v	spectral	1.07575862269825
mha30_vowel.txt	36	B2	R	v	spectral	1.08409609512278
mha30_vowel.txt	37	B2	R	v	spectral	1.09308388714514
mha30_vowel.txt	38	B2	R	v	spectral	1.07453155133585
mha30_vowel.txt	39	B2	R	v	spectral	1.06893440949978
mha30_vowel.txt	40	B2	R	v	spectral	1.00005012536294
mha30_vowel.txt	41	B3	R	v	spectral	1.01461155265182
mha30_vowel.txt	42	B3	R	v	spectral	0.976034410656516
mha30_vowel.txt	43	B3	R	v	spectral	1.07624862060897
mha30_vowel.txt	44	B3	R	v	spectral	0.975801304303577
mha30_vowel.txt	45	B3	R	v	spectral	1.01363861192748
mha30_vowel.txt	46	B3	R	v	spectral	1.06476965006464
mha30_vowel.txt	47	B3	R	v	spectral	1.03846140104021
mha30_vowel.txt	48	B3	R	v	spectral	NA
mha30_vowel.txt	49	B3	R	v	spectral	0.999011809038005
mha30_vowel.txt	50	B3	R	v	spectral	1.00653570953529
mha30_vowel.txt	51	B3	R	v	spectral	1.02164023015934
mha30_vowel.txt	52	B3	R	v	spectral	1.01411607985756
mha30_vowel.txt	53	B3	R	v	spectral	1.01368896963484
mha30_vowel.txt	54	B3	R	v	spectral	0.971749976124522
mha30_vowel.txt	55	B3	R	v	spectral	0.979803768360705
mha30_vowel.txt	56	B3	R	v	spectral	0.948712915438204
mha30_vowel.txt	57	B3	R	v	spectral	0.99966492216161
mha30_vowel.txt	58	B3	R	v	spectral	1.04319394582397
mha30_vowel.txt	59	B3	R	v	spectral	1.02863315840026
mha30_vowel.txt	60	B3	R	v	spectral	1.00202766224619
mha30_vowel.txt	61	B4	R	v	spectral	1.02701443507058
mha30_vowel.txt	62	B4	R	v	spectral	0.996228986370699
mha30_vowel.txt	63	B4	R	v	spectral	0.968885508785984
mha30_vowel.txt	64	B4	R	v	spectral	0.975418957901708
mha30_vowel.txt	65	B4	R	v	spectral	1.06337370318383
mha30_vowel.txt	66	B4	R	v	spectral	1.01941512657618
mha30_vowel.txt	67	B4	R	v	spectral	1.02717993150659
mha30_vowel.txt	68	B4	R	v	spectral	0.97661109316763
mha30_vowel.txt	69	B4	R	v	spectral	NA
mha30_vowel.txt	70	B4	R	v	spectral	1.03117529712144
mha30_vowel.txt	71	B4	R	v	spectral	1.03570630558262
mha30_vowel.txt	72	B4	R	v	spectral	1.07298044757974
mha30_vowel.txt	73	B4	R	v	spectral	1.03400872557244
mha30_vowel.txt	74	B4	R	v	spectral	0.980999048403323
mha30_vowel.txt	75	B4	R	v	spectral	1.04748036414236
mha30_vowel.txt	76	B4	R	v	spectral	0.989769009143527
mha30_vowel.txt	77	B4	R	v	spectral	0.9812501661191
mha30_vowel.txt	78	B4	R	v	spectral	1.00980526521168
mha30_vowel.txt	79	B4	R	v	spectral	1.00919024988956
mha30_vowel.txt	80	B4	R	v	spectral	1.0050491853358
mha30_vowel.txt	81	B5	R	v	spectral	1.00595844741934
mha30_vowel.txt	82	B5	R	v	spectral	1.00503077706034
mha30_vowel.txt	83	B5	R	v	spectral	0.983663171078638
mha30_vowel.txt	84	B5	R	v	spectral	0.985285963131059
mha30_vowel.txt	85	B5	R	v	spectral	1.00202501476621
mha30_vowel.txt	86	B5	R	v	spectral	1.0207028450997
mha30_vowel.txt	87	B5	R	v	spectral	1.05138071423652
mha30_vowel.txt	88	B5	R	v	spectral	1.00548742801545
mha30_vowel.txt	89	B5	R	v	spectral	0.994999375058793
mha30_vowel.txt	90	B5	R	v	spectral	1.04701679346073
mha30_vowel.txt	91	B5	R	v	spectral	1.03359964090763
mha30_vowel.txt	92	B5	R	v	spectral	1.00187402095074
mha30_vowel.txt	93	B5	R	v	spectral	1.02153782123208
mha30_vowel.txt	94	B5	R	v	spectral	NA
mha30_vowel.txt	95	B5	R	v	spectral	1.02747933223232
mha30_vowel.txt	96	B5	R	v	spectral	0.988996819265264
mha30_vowel.txt	97	B5	R	v	spectral	1.01422105313332
mha30_vowel.txt	98	B5	R	v	spectral	1.04397813136626
mha30_vowel.txt	99	B5	R	v	spectral	1.06065911990774
mha30_vowel.txt	100	B5	R	v	spectral	0.993332117178624
mha30_vowel.txt	1	B1	L	v	spectral	1.01479871281806
mha30_vowel.txt	2	B1	L	v	spectral	1.00191433621836
mha30_vowel.txt	3	B1	L	v	spectral	0.97967941652703
mha30_vowel.txt	4	B1	L	v	spectral	0.91362568619615
mha30_vowel.txt	5	B1	L	v	spectral	0.981993511029407
mha30_vowel.txt	6	B1	L	v	spectral	0.932022364726552
mha30_vowel.txt	7	B1	L	v	spectral	1.0273507182109
mha30_vowel.txt	8	B1	L	v	spectral	1.01303267233029
mha30_vowel.txt	9	B1	L	v	spectral	0.980945602931156
mha30_vowel.txt	10	B1	L	v	spectral	0.970287892713418
mha30_vowel.txt	11	B1	L	v	spectral	NA
mha30_vowel.txt	12	B1	L	v	spectral	0.93182428625318
mha30_vowel.txt	13	B1	L	v	spectral	1.00437600155998
mha30_vowel.txt	14	B1	L	v	spectral	1.04549658389682
mha30_vowel.txt	15	B1	L	v	spectral	1.06690470984425
mha30_vowel.txt	16	B1	L	v	spectral	1.03304080464816
mha30_vowel.txt	17	B1	L	v	spectral	1.06764291828988
mha30_vowel.txt	19	B1	L	v	spectral	1.02955874820692
mha30_vowel.txt	20	B1	L	v	spectral	1.00550503359951
mha30_vowel.txt	21	B2	L	v	spectral	1.0187309569979
mha30_vowel.txt	22	B2	L	v	spectral	1.00649280834087
mha30_vowel.txt	23	B2	L	v	spectral	1.01139350121738
mha30_vowel.txt	24	B2	L	v	spectral	0.974679059065381
mha30_vowel.txt	25	B2	L	v	spectral	0.978168864518798
mha30_vowel.txt	26	B2	L	v	spectral	1.02925838316138
mha30_vowel.txt	27	B2	L	v	spectral	1.05320887397958
mha30_vowel.txt	28	B2	L	v	spectral	1.03365364062966
mha30_vowel.txt	29	B2	L	v	spectral	1.06979233435956
mha30_vowel.txt	30	B2	L	v	spectral	1.07748798529918
mha30_vowel.txt	31	B2	L	v	spectral	1.04469216729852
mha30_vowel.txt	32	B2	L	v	spectral	1.04100855289616
mha30_vowel.txt	33	B2	L	v	spectral	1.05518273505804
mha30_vowel.txt	34	B2	L	v	spectral	1.07976591897741
mha30_vowel.txt	35	B2	L	v	spectral	1.08881380925536
mha30_vowel.txt	36	B2	L	v	spectral	1.01931492928395
mha30_vowel.txt	37	B2	L	v	spectral	0.998673681593481
mha30_vowel.txt	38	B2	L	v	spectral	1.00882808196309
mha30_vowel.txt	39	B2	L	v	spectral	1.03303694562525
mha30_vowel.txt	40	B2	L	v	spectral	0.987156832882708
mha30_vowel.txt	41	B3	L	v	spectral	NA
mha30_vowel.txt	42	B3	L	v	spectral	0.97681218800824
mha30_vowel.txt	43	B3	L	v	spectral	1.00855337464596
mha30_vowel.txt	44	B3	L	v	spectral	1.09270941227073
mha30_vowel.txt	45	B3	L	v	spectral	1.01665350529933
mha30_vowel.txt	46	B3	L	v	spectral	1.04672541997273
mha30_vowel.txt	47	B3	L	v	spectral	0.998261599931435
mha30_vowel.txt	48	B3	L	v	spectral	1.01934340385014
mha30_vowel.txt	49	B3	L	v	spectral	1.03199900023509
mha30_vowel.txt	50	B3	L	v	spectral	0.967764918651071
mha30_vowel.txt	51	B3	L	v	spectral	1.00394518602076
mha30_vowel.txt	52	B3	L	v	spectral	1.06072096929866
mha30_vowel.txt	53	B3	L	v	spectral	1.07383185758216
mha30_vowel.txt	54	B3	L	v	spectral	0.998061004710341
mha30_vowel.txt	55	B3	L	v	spectral	0.987625048294395
mha30_vowel.txt	56	B3	L	v	spectral	0.981962722793754
mha30_vowel.txt	57	B3	L	v	spectral	0.998719969352422
mha30_vowel.txt	58	B3	L	v	spectral	1.00207840994125
mha30_vowel.txt	59	B3	L	v	spectral	1.02901477336901
mha30_vowel.txt	60	B3	L	v	spectral	1.05576729376965
mha30_vowel.txt	61	B4	L	v	spectral	0.996201413249059
mha30_vowel.txt	62	B4	L	v	spectral	NA
mha30_vowel.txt	63	B4	L	v	spectral	1.00573416461691
mha30_vowel.txt	64	B4	L	v	spectral	0.997395599451166
mha30_vowel.txt	65	B4	L	v	spectral	1.01156256951872
mha30_vowel.txt	66	B4	L	v	spectral	1.06598330874954
mha30_vowel.txt	67	B4	L	v	spectral	1.01496736190996
mha30_vowel.txt	68	B4	L	v	spectral	1.0137784161908
mha30_vowel.txt	69	B4	L	v	spectral	1.00892887969256
mha30_vowel.txt	70	B4	L	v	spectral	0.992065748759253
mha30_vowel.txt	71	B4	L	v	spectral	1.04255133650617
mha30_vowel.txt	72	B4	L	v	spectral	1.06078071960684
mha30_vowel.txt	73	B4	L	v	spectral	1.02113728175817
mha30_vowel.txt	74	B4	L	v	spectral	0.993440670102708
mha30_vowel.txt	75	B4	L	v	spectral	1.00519619678667
mha30_vowel.txt	76	B4	L	v	spectral	0.99099766499941
mha30_vowel.txt	77	B4	L	v	spectral	0.965879022056029
mha30_vowel.txt	78	B4	L	v	spectral	1.04075383049668
mha30_vowel.txt	79	B4	L	v	spectral	1.00622158659211
mha30_vowel.txt	80	B4	L	v	spectral	1.04781971393515
mha30_vowel.txt	81	B5	L	v	spectral	1.0045119140759
mha30_vowel.txt	82	B5	L	v	spectral	1.00522694058051
mha30_vowel.txt	83	B5	L	v	spectral	1.08244280246752
mha30_vowel.txt	84	B5	L	v	spectral	1.01462571628465
mha30_vowel.txt	85	B5	L	v	spectral	1.00752071356754
mha30_vowel.txt	86	B5	L	v	spectral	1.00005115044206
mha30_vowel.txt	87	B5	L	v	spectral	1.03644759741923
mha30_vowel.txt	88	B5	L	v	spectral	1.02211059514362
mha30_vowel.txt	89	B5	L	v	spectral	1.0238586813523
mha30_vowel.txt	90	B5	L	v	spectral	1.02926176597876
mha30_vowel.txt	91	B5	L	v	spectral	1.0343705094837
mha30_vowel.txt	92	B5	L	v	spectral	1.05089639967039
mha30_vowel.txt	93	B5	L	v	spectral	1.0659015352091
mha30_vowel.txt	94	B5	L	v	spectral	1.06113565548144
mha30_vowel.txt	95	B5	L	v	spectral	1.01960663276854
mha30_vowel.txt	96	B5	L	v	spectral	1.0639263852704
mha30_vowel.txt	97	B5	L	v	spectral	1.09123679797532
mha30_vowel.txt	98	B5	L	v	spectral	1.07013168487967
mha30_vowel.txt	99	B5	L	v	spectral	1.02316045010447
mha30_vowel.txt	100	B5	L	v	spectral	1.03153015986054
nwa20_vowel.txt	1	B1	R	v	spectral	1.06210481359046
nwa20_vowel.txt	2	B1	R	v	spectral	1.00917284675388
nwa20_vowel.txt	3	B1	R	v	spectral	1.03079900095945
nwa20_vowel.txt	4	B1	R	v	spectral	1.01697837071287
nwa20_vowel.txt	5	B1	R	v	spectral	0.986392813051062
nwa20_vowel.txt	6	B1	R	v	spectral	0.988573123048813
nwa20_vowel.txt	7	B1	R	v	spectral	0.985790315532725
nwa20_vowel.txt	8	B1	R	v	spectral	1.03152689480017
nwa20_vowel.txt	9	B1	R	v	spectral	NA
nwa20_vowel.txt	10	B1	R	v	spectral	0.974705184444372
nwa20_vowel.txt	11	B1	R	v	spectral	1.07288055355748
nwa20_vowel.txt	12	B1	R	v	spectral	0.905155233200182
nwa20_vowel.txt	13	B1	R	v	spectral	0.93421560910825
nwa20_vowel.txt	14	B1	R	v	spectral	0.995723378771276
nwa20_vowel.txt	15	B1	R	v	spectral	0.961563803243652
nwa20_vowel.txt	16	B1	R	v	spectral	1.05166299124609
nwa20_vowel.txt	17	B1	R	v	spectral	1.03892802973661
nwa20_vowel.txt	18	B1	R	v	spectral	1.01234146016101
nwa20_vowel.txt	19	B1	R	v	spectral	0.930069431016762
nwa20_vowel.txt	20	B1	R	v	spectral	1.01141614706489
nwa20_vowel.txt	21	B2	R	v	spectral	0.902103106750814
nwa20_vowel.txt	22	B2	R	v	spectral	0.89488420647163
nwa20_vowel.txt	23	B2	R	v	spectral	0.879950003782266
nwa20_vowel.txt	24	B2	R	v	spectral	0.92496201018444
nwa20_vowel.txt	25	B2	R	v	spectral	0.843934555752449
nwa20_vowel.txt	26	B2	R	v	spectral	NA
nwa20_vowel.txt	27	B2	R	v	spectral	0.895599839678207
nwa20_vowel.txt	28	B2	R	v	spectral	0.83099827746074
nwa20_vowel.txt	29	B2	R	v	spectral	0.863961633171198
nwa20_vowel.txt	30	B2	R	v	spectral	0.902766894161762
nwa20_vowel.txt	31	B2	R	v	spectral	0.896611272118612
nwa20_vowel.txt	32	B2	R	v	spectral	1.00255094768244
nwa20_vowel.txt	33	B2	R	v	spectral	0.991933245198405
nwa20_vowel.txt	34	B2	R	v	spectral	0.942258349020985
nwa20_vowel.txt	35	B2	R	v	spectral	0.947838216737467
nwa20_vowel.txt	36	B2	R	v	spectral	0.847476341012175
nwa20_vowel.txt	37	B2	R	v	spectral	0.893899389745131
nwa20_vowel.txt	38	B2	R	v	spectral	0.956468078172527
nwa20_vowel.txt	39	B2	R	v	spectral	0.857331205377202
nwa20_vowel.txt	40	B2	R	v	spectral	0.887498272689073
nwa20_vowel.txt	41	B3	R	v	spectral	0.869054928732274
nwa20_vowel.txt	42	B3	R	v	spectral	0.768896825698744
nwa20_vowel.txt	43	B3	R	v	spectral	0.945594291439981
nwa20_vowel.txt	44	B3	R	v	spectral	0.814773367306935
nwa20_vowel.txt	45	B3	R	v	spectral	0.804803461111613
nwa20_vowel.txt	46	B3	R	v	spectral	0.781381526788433
nwa20_vowel.txt	47	B3	R	v	spectral	0.740574058727262
nwa20_vowel.txt	48	B3	R	v	spectral	0.852050836021587
nwa20_vowel.txt	49	B3	R	v	spectral	0.814133919349026
nwa20_vowel.txt	50	B3	R	v	spectral	0.958392070311766
nwa20_vowel.txt	51	B3	R	v	spectral	0.909672722372176
nwa20_vowel.txt	52	B3	R	v	spectral	0.908266232246638
nwa20_vowel.txt	53	B3	R	v	spectral	0.953881539101913
nwa20_vowel.txt	54	B3	R	v	spectral	0.867925107095767
nwa20_vowel.txt	55	B3	R	v	spectral	0.85082066333625
nwa20_vowel.txt	56	B3	R	v	spectral	0.895788922943526
nwa20_vowel.txt	57	B3	R	v	spectral	0.9416559994297
nwa20_vowel.txt	58	B3	R	v	spectral	0.862920470073608
nwa20_vowel.txt	59	B3	R	v	spectral	0.872518301345404
nwa20_vowel.txt	60	B3	R	v	spectral	0.945881120603636
nwa20_vowel.txt	61	B4	R	v	spectral	0.818644245872699
nwa20_vowel.txt	62	B4	R	v	spectral	0.73070993167004
nwa20_vowel.txt	63	B4	R	v	spectral	0.740426525698879
nwa20_vowel.txt	64	B4	R	v	spectral	0.671489108937839
nwa20_vowel.txt	65	B4	R	v	spectral	0.831175885169072
nwa20_vowel.txt	66	B4	R	v	spectral	1.03700114930249
nwa20_vowel.txt	67	B4	R	v	spectral	0.787705063100283
nwa20_vowel.txt	68	B4	R	v	spectral	0.810338008866295
nwa20_vowel.txt	69	B4	R	v	spectral	0.924297376541632
nwa20_vowel.txt	70	B4	R	v	spectral	0.901416754513533
nwa20_vowel.txt	71	B4	R	v	spectral	0.766693841904427
nwa20_vowel.txt	72	B4	R	v	spectral	0.85933202121795
nwa20_vowel.txt	73	B4	R	v	spectral	NA
nwa20_vowel.txt	74	B4	R	v	spectral	0.756845376259484
nwa20_vowel.txt	75	B4	R	v	spectral	0.872295193187178
nwa20_vowel.txt	76	B4	R	v	spectral	0.810982214381453
nwa20_vowel.txt	77	B4	R	v	spectral	0.750450092433369
nwa20_vowel.txt	78	B4	R	v	spectral	0.891864802325965
nwa20_vowel.txt	79	B4	R	v	spectral	0.965667453399074
nwa20_vowel.txt	80	B4	R	v	spectral	0.809712502095773
nwa20_vowel.txt	81	B5	R	v	spectral	1.00760170733087
nwa20_vowel.txt	82	B5	R	v	spectral	1.02625484174785
nwa20_vowel.txt	83	B5	R	v	spectral	0.819781764701015
nwa20_vowel.txt	84	B5	R	v	spectral	0.796082182488722
nwa20_vowel.txt	85	B5	R	v	spectral	0.780684129216113
nwa20_vowel.txt	86	B5	R	v	spectral	0.774307204441608
nwa20_vowel.txt	87	B5	R	v	spectral	0.958833839766971
nwa20_vowel.txt	88	B5	R	v	spectral	0.968787860099746
nwa20_vowel.txt	89	B5	R	v	spectral	0.708630034797032
nwa20_vowel.txt	90	B5	R	v	spectral	0.955720804248
nwa20_vowel.txt	91	B5	R	v	spectral	0.78012587067299
nwa20_vowel.txt	92	B5	R	v	spectral	0.954366721012424
nwa20_vowel.txt	93	B5	R	v	spectral	0.859232600339009
nwa20_vowel.txt	94	B5	R	v	spectral	0.819989187761067
nwa20_vowel.txt	95	B5	R	v	spectral	0.855580422805662
nwa20_vowel.txt	96	B5	R	v	spectral	1.0451878445397
nwa20_vowel.txt	97	B5	R	v	spectral	0.96538803869772
nwa20_vowel.txt	98	B5	R	v	spectral	0.983476937265967
nwa20_vowel.txt	99	B5	R	v	spectral	1.04191470450631
nwa20_vowel.txt	100	B5	R	v	spectral	1.01118981628873
nwa20_vowel.txt	1	B1	L	v	spectral	0.987465815742533
nwa20_vowel.txt	2	B1	L	v	spectral	0.990566639978878
nwa20_vowel.txt	3	B1	L	v	spectral	0.976955129949131
nwa20_vowel.txt	4	B1	L	v	spectral	0.998094487027925
nwa20_vowel.txt	5	B1	L	v	spectral	1.02291793204968
nwa20_vowel.txt	6	B1	L	v	spectral	0.994334887507412
nwa20_vowel.txt	7	B1	L	v	spectral	0.945311272993906
nwa20_vowel.txt	8	B1	L	v	spectral	0.969163961104913
nwa20_vowel.txt	9	B1	L	v	spectral	0.914570741789158
nwa20_vowel.txt	10	B1	L	v	spectral	0.9589013672085
nwa20_vowel.txt	11	B1	L	v	spectral	0.985595986730297
nwa20_vowel.txt	12	B1	L	v	spectral	1.04366997074265
nwa20_vowel.txt	13	B1	L	v	spectral	1.06035787894722
nwa20_vowel.txt	14	B1	L	v	spectral	1.02743322407204
nwa20_vowel.txt	15	B1	L	v	spectral	0.999408131582173
nwa20_vowel.txt	16	B1	L	v	spectral	1.0636609532219
nwa20_vowel.txt	17	B1	L	v	spectral	1.03177845608233
nwa20_vowel.txt	18	B1	L	v	spectral	0.979751025357852
nwa20_vowel.txt	19	B1	L	v	spectral	NA
nwa20_vowel.txt	20	B1	L	v	spectral	1.0500621379115
nwa20_vowel.txt	21	B2	L	v	spectral	0.99980351884312
nwa20_vowel.txt	22	B2	L	v	spectral	1.02383687163302
nwa20_vowel.txt	23	B2	L	v	spectral	1.03476437229469
nwa20_vowel.txt	24	B2	L	v	spectral	0.973522803386478
nwa20_vowel.txt	25	B2	L	v	spectral	1.05879031178128
nwa20_vowel.txt	26	B2	L	v	spectral	1.03347421368296
nwa20_vowel.txt	27	B2	L	v	spectral	1.07152693532018
nwa20_vowel.txt	28	B2	L	v	spectral	1.03793195404458
nwa20_vowel.txt	29	B2	L	v	spectral	0.992889128113698
nwa20_vowel.txt	30	B2	L	v	spectral	1.0159355671503
nwa20_vowel.txt	31	B2	L	v	spectral	1.01410531160654
nwa20_vowel.txt	32	B2	L	v	spectral	0.910364189512947
nwa20_vowel.txt	33	B2	L	v	spectral	NA
nwa20_vowel.txt	34	B2	L	v	spectral	0.985317690487579
nwa20_vowel.txt	35	B2	L	v	spectral	0.961899977750906
nwa20_vowel.txt	36	B2	L	v	spectral	1.00023067378013
nwa20_vowel.txt	37	B2	L	v	spectral	0.899265839545315
nwa20_vowel.txt	38	B2	L	v	spectral	1.0263132219753
nwa20_vowel.txt	39	B2	L	v	spectral	0.959700217697298
nwa20_vowel.txt	40	B2	L	v	spectral	0.988236568642241
nwa20_vowel.txt	41	B3	L	v	spectral	1.00748638082715
nwa20_vowel.txt	42	B3	L	v	spectral	0.976659270255379
nwa20_vowel.txt	43	B3	L	v	spectral	0.951895482186308
nwa20_vowel.txt	44	B3	L	v	spectral	1.03627293929089
nwa20_vowel.txt	45	B3	L	v	spectral	0.942840346412969
nwa20_vowel.txt	46	B3	L	v	spectral	1.00824834117297
nwa20_vowel.txt	47	B3	L	v	spectral	1.01058874681652
nwa20_vowel.txt	48	B3	L	v	spectral	0.966560453953411
nwa20_vowel.txt	49	B3	L	v	spectral	1.02331255233098
nwa20_vowel.txt	50	B3	L	v	spectral	0.98271828111711
nwa20_vowel.txt	51	B3	L	v	spectral	0.994286570645939
nwa20_vowel.txt	52	B3	L	v	spectral	0.94518190485628
nwa20_vowel.txt	53	B3	L	v	spectral	1.02400208527831
nwa20_vowel.txt	54	B3	L	v	spectral	1.01072037693508
nwa20_vowel.txt	55	B3	L	v	spectral	1.02889681093505
nwa20_vowel.txt	56	B3	L	v	spectral	1.00965797160352
nwa20_vowel.txt	57	B3	L	v	spectral	0.945471112374996
nwa20_vowel.txt	58	B3	L	v	spectral	0.959971771137298
nwa20_vowel.txt	59	B3	L	v	spectral	1.00008971808652
nwa20_vowel.txt	60	B3	L	v	spectral	NA
nwa20_vowel.txt	61	B4	L	v	spectral	NA
nwa20_vowel.txt	62	B4	L	v	spectral	0.988274324417033
nwa20_vowel.txt	63	B4	L	v	spectral	0.927763147747872
nwa20_vowel.txt	64	B4	L	v	spectral	1.0444965768744
nwa20_vowel.txt	65	B4	L	v	spectral	1.01646645675559
nwa20_vowel.txt	66	B4	L	v	spectral	1.05942603335256
nwa20_vowel.txt	67	B4	L	v	spectral	0.934292659555528
nwa20_vowel.txt	68	B4	L	v	spectral	1.03792808834984
nwa20_vowel.txt	69	B4	L	v	spectral	0.998638248799851
nwa20_vowel.txt	70	B4	L	v	spectral	0.964643815071732
nwa20_vowel.txt	71	B4	L	v	spectral	0.999686810418268
nwa20_vowel.txt	72	B4	L	v	spectral	0.955159670178953
nwa20_vowel.txt	73	B4	L	v	spectral	0.974765530117556
nwa20_vowel.txt	74	B4	L	v	spectral	0.949878896416988
nwa20_vowel.txt	75	B4	L	v	spectral	0.964823698815533
nwa20_vowel.txt	76	B4	L	v	spectral	0.961421786327827
nwa20_vowel.txt	77	B4	L	v	spectral	0.990971627196749
nwa20_vowel.txt	78	B4	L	v	spectral	0.964092390959499
nwa20_vowel.txt	79	B4	L	v	spectral	1.00799665821402
nwa20_vowel.txt	80	B4	L	v	spectral	0.960586504843918
nwa20_vowel.txt	81	B5	L	v	spectral	1.03014354948929
nwa20_vowel.txt	82	B5	L	v	spectral	1.02835087789127
nwa20_vowel.txt	83	B5	L	v	spectral	1.00182705076825
nwa20_vowel.txt	84	B5	L	v	spectral	0.972136800661405
nwa20_vowel.txt	85	B5	L	v	spectral	1.06097924002728
nwa20_vowel.txt	86	B5	L	v	spectral	1.03104103689439
nwa20_vowel.txt	87	B5	L	v	spectral	NA
nwa20_vowel.txt	88	B5	L	v	spectral	1.05680764990233
nwa20_vowel.txt	89	B5	L	v	spectral	0.968212213181683
nwa20_vowel.txt	90	B5	L	v	spectral	0.909479486722459
nwa20_vowel.txt	91	B5	L	v	spectral	1.0464609610222
nwa20_vowel.txt	92	B5	L	v	spectral	1.06917864419969
nwa20_vowel.txt	93	B5	L	v	spectral	1.03195341348337
nwa20_vowel.txt	94	B5	L	v	spectral	0.98087796014256
nwa20_vowel.txt	95	B5	L	v	spectral	0.967555783234077
nwa20_vowel.txt	96	B5	L	v	spectral	1.05022811728522
nwa20_vowel.txt	97	B5	L	v	spectral	1.01420693488986
nwa20_vowel.txt	98	B5	L	v	spectral	1.00763478464308
nwa20_vowel.txt	99	B5	L	v	spectral	0.99334254749357
nwa20_vowel.txt	100	B5	L	v	spectral	1.00925094968973
sdn20_vowel.txt	1	B1	R	v	spectral	1.01538517463859
sdn20_vowel.txt	2	B1	R	v	spectral	1.0219136901932
sdn20_vowel.txt	3	B1	R	v	spectral	1.00063647111554
sdn20_vowel.txt	4	B1	R	v	spectral	1.02911184285223
sdn20_vowel.txt	5	B1	R	v	spectral	1.02944781688982
sdn20_vowel.txt	6	B1	R	v	spectral	1.00040666861221
sdn20_vowel.txt	7	B1	R	v	spectral	1.03764928487094
sdn20_vowel.txt	8	B1	R	v	spectral	0.994884618957908
sdn20_vowel.txt	9	B1	R	v	spectral	1.01944934461743
sdn20_vowel.txt	10	B1	R	v	spectral	1.00213319706172
sdn20_vowel.txt	11	B1	R	v	spectral	0.953426462144843
sdn20_vowel.txt	12	B1	R	v	spectral	1.02309709970041
sdn20_vowel.txt	13	B1	R	v	spectral	1.03086197633017
sdn20_vowel.txt	14	B1	R	v	spectral	0.967604127053555
sdn20_vowel.txt	15	B1	R	v	spectral	0.967810520360807
sdn20_vowel.txt	16	B1	R	v	spectral	0.962555222011118
sdn20_vowel.txt	17	B1	R	v	spectral	0.968008570771211
sdn20_vowel.txt	18	B1	R	v	spectral	0.956045941215753
sdn20_vowel.txt	19	B1	R	v	spectral	0.980432740419523
sdn20_vowel.txt	20	B1	R	v	spectral	1.03913923018302
sdn20_vowel.txt	21	B2	R	v	spectral	0.944108123632336
sdn20_vowel.txt	22	B2	R	v	spectral	0.975561917444263
sdn20_vowel.txt	23	B2	R	v	spectral	0.997623958682806
sdn20_vowel.txt	24	B2	R	v	spectral	0.926842010291346
sdn20_vowel.txt	25	B2	R	v	spectral	0.938052293983295
sdn20_vowel.txt	26	B2	R	v	spectral	0.96240107655514
sdn20_vowel.txt	27	B2	R	v	spectral	0.930862268938822
sdn20_vowel.txt	28	B2	R	v	spectral	0.968932190336544
sdn20_vowel.txt	29	B2	R	v	spectral	0.945798218954298
sdn20_vowel.txt	30	B2	R	v	spectral	0.933751712786332
sdn20_vowel.txt	31	B2	R	v	spectral	0.98795815499639
sdn20_vowel.txt	32	B2	R	v	spectral	1.00735590541681
sdn20_vowel.txt	33	B2	R	v	spectral	0.943058621437164
sdn20_vowel.txt	34	B2	R	v	spectral	NA
sdn20_vowel.txt	35	B2	R	v	spectral	0.965687241210643
sdn20_vowel.txt	36	B2	R	v	spectral	0.976734426767064
sdn20_vowel.txt	37	B2	R	v	spectral	0.924508378885145
sdn20_vowel.txt	38	B2	R	v	spectral	0.958205505840787
sdn20_vowel.txt	39	B2	R	v	spectral	0.942804034177378
sdn20_vowel.txt	40	B2	R	v	spectral	0.934177298565307
sdn20_vowel.txt	41	B3	R	v	spectral	0.963036371744207
sdn20_vowel.txt	42	B3	R	v	spectral	0.943527277739656
sdn20_vowel.txt	43	B3	R	v	spectral	0.896879924722799
sdn20_vowel.txt	44	B3	R	v	spectral	0.956165072080111
sdn20_vowel.txt	45	B3	R	v	spectral	0.935021508018377
sdn20_vowel.txt	46	B3	R	v	spectral	0.942028258400472
sdn20_vowel.txt	47	B3	R	v	spectral	0.943315386118074
sdn20_vowel.txt	48	B3	R	v	spectral	0.9727359420937
sdn20_vowel.txt	49	B3	R	v	spectral	NA
sdn20_vowel.txt	50	B3	R	v	spectral	0.944905440511595
sdn20_vowel.txt	51	B3	R	v	spectral	0.92972692338305
sdn20_vowel.txt	52	B3	R	v	spectral	0.946940775180087
sdn20_vowel.txt	53	B3	R	v	spectral	0.879481378616883
sdn20_vowel.txt	54	B3	R	v	spectral	0.979982001728804
sdn20_vowel.txt	55	B3	R	v	spectral	0.956011251047947
sdn20_vowel.txt	56	B3	R	v	spectral	0.896404699280249
sdn20_vowel.txt	57	B3	R	v	spectral	0.936347741140706
sdn20_vowel.txt	58	B3	R	v	spectral	0.955474329030832
sdn20_vowel.txt	59	B3	R	v	spectral	0.993146108207627
sdn20_vowel.txt	60	B3	R	v	spectral	0.920500768876588
sdn20_vowel.txt	61	B4	R	v	spectral	0.90720321207359
sdn20_vowel.txt	62	B4	R	v	spectral	0.928762703597456
sdn20_vowel.txt	63	B4	R	v	spectral	NA
sdn20_vowel.txt	64	B4	R	v	spectral	0.977418334223661
sdn20_vowel.txt	65	B4	R	v	spectral	0.932241091661235
sdn20_vowel.txt	66	B4	R	v	spectral	0.983921328157013
sdn20_vowel.txt	67	B4	R	v	spectral	0.969384747213769
sdn20_vowel.txt	68	B4	R	v	spectral	0.981975356938696
sdn20_vowel.txt	69	B4	R	v	spectral	0.96678171794651
sdn20_vowel.txt	70	B4	R	v	spectral	0.948013205587114
sdn20_vowel.txt	71	B4	R	v	spectral	0.947778364534641
sdn20_vowel.txt	72	B4	R	v	spectral	0.983830501807314
sdn20_vowel.txt	73	B4	R	v	spectral	0.952594704723422
sdn20_vowel.txt	74	B4	R	v	spectral	0.968799436046079
sdn20_vowel.txt	75	B4	R	v	spectral	0.958605535991804
sdn20_vowel.txt	76	B4	R	v	spectral	0.944563427365697
sdn20_vowel.txt	77	B4	R	v	spectral	0.937549706390901
sdn20_vowel.txt	78	B4	R	v	spectral	0.935764552119781
sdn20_vowel.txt	79	B4	R	v	spectral	0.956913258564238
sdn20_vowel.txt	80	B4	R	v	spectral	0.906046557635944
sdn20_vowel.txt	81	B5	R	v	spectral	0.944990325541102
sdn20_vowel.txt	82	B5	R	v	spectral	0.964222516752026
sdn20_vowel.txt	83	B5	R	v	spectral	0.976117445697941
sdn20_vowel.txt	84	B5	R	v	spectral	0.936949991036748
sdn20_vowel.txt	85	B5	R	v	spectral	NA
sdn20_vowel.txt	86	B5	R	v	spectral	0.973919101850686
sdn20_vowel.txt	87	B5	R	v	spectral	0.995754844811048
sdn20_vowel.txt	88	B5	R	v	spectral	0.985850201514055
sdn20_vowel.txt	89	B5	R	v	spectral	0.956566811863497
sdn20_vowel.txt	90	B5	R	v	spectral	0.96099567534773
sdn20_vowel.txt	91	B5	R	v	spectral	0.940901833340384
sdn20_vowel.txt	92	B5	R	v	spectral	0.993506143225147
sdn20_vowel.txt	93	B5	R	v	spectral	0.921882853990793
sdn20_vowel.txt	94	B5	R	v	spectral	0.94703336040735
sdn20_vowel.txt	95	B5	R	v	spectral	0.967871530535397
sdn20_vowel.txt	96	B5	R	v	spectral	0.942120364696458
sdn20_vowel.txt	97	B5	R	v	spectral	0.983426510693235
sdn20_vowel.txt	98	B5	R	v	spectral	0.974461520964631
sdn20_vowel.txt	99	B5	R	v	spectral	0.931095088572458
sdn20_vowel.txt	100	B5	R	v	spectral	0.932293509939362
sdn20_vowel.txt	1	B1	L	v	spectral	0.981784777914824
sdn20_vowel.txt	2	B1	L	v	spectral	0.998313785991805
sdn20_vowel.txt	3	B1	L	v	spectral	0.993308223821561
sdn20_vowel.txt	4	B1	L	v	spectral	1.00829589033856
sdn20_vowel.txt	5	B1	L	v	spectral	0.994119287690625
sdn20_vowel.txt	6	B1	L	v	spectral	0.992683005555063
sdn20_vowel.txt	7	B1	L	v	spectral	1.02131521199736
sdn20_vowel.txt	8	B1	L	v	spectral	0.971332591214449
sdn20_vowel.txt	9	B1	L	v	spectral	1.03795510260874
sdn20_vowel.txt	10	B1	L	v	spectral	1.00486465805404
sdn20_vowel.txt	11	B1	L	v	spectral	1.01838241322814
sdn20_vowel.txt	12	B1	L	v	spectral	0.983327439883017
sdn20_vowel.txt	13	B1	L	v	spectral	0.998248842676297
sdn20_vowel.txt	14	B1	L	v	spectral	0.971537636404457
sdn20_vowel.txt	15	B1	L	v	spectral	1.0548580488362
sdn20_vowel.txt	16	B1	L	v	spectral	1.04393432395926
sdn20_vowel.txt	17	B1	L	v	spectral	0.949036967433022
sdn20_vowel.txt	18	B1	L	v	spectral	NA
sdn20_vowel.txt	19	B1	L	v	spectral	0.989252216026139
sdn20_vowel.txt	20	B1	L	v	spectral	0.987449576366435
sdn20_vowel.txt	21	B2	L	v	spectral	0.953420751279337
sdn20_vowel.txt	22	B2	L	v	spectral	0.91703667118984
sdn20_vowel.txt	23	B2	L	v	spectral	0.909291090142802
sdn20_vowel.txt	24	B2	L	v	spectral	0.960689807873232
sdn20_vowel.txt	25	B2	L	v	spectral	0.963358541586894
sdn20_vowel.txt	26	B2	L	v	spectral	0.989414963798965
sdn20_vowel.txt	27	B2	L	v	spectral	0.945039001262197
sdn20_vowel.txt	28	B2	L	v	spectral	0.915139047099532
sdn20_vowel.txt	29	B2	L	v	spectral	0.971442191660682
sdn20_vowel.txt	30	B2	L	v	spectral	0.973911929482359
sdn20_vowel.txt	31	B2	L	v	spectral	0.971807381579172
sdn20_vowel.txt	32	B2	L	v	spectral	0.925744297577521
sdn20_vowel.txt	33	B2	L	v	spectral	0.953948847078683
sdn20_vowel.txt	34	B2	L	v	spectral	1.01533711673127
sdn20_vowel.txt	35	B2	L	v	spectral	0.941749624945683
sdn20_vowel.txt	36	B2	L	v	spectral	0.966911119040291
sdn20_vowel.txt	37	B2	L	v	spectral	0.97053785378233
sdn20_vowel.txt	38	B2	L	v	spectral	0.992682519391958
sdn20_vowel.txt	39	B2	L	v	spectral	0.985412642425356
sdn20_vowel.txt	40	B2	L	v	spectral	1.0078945494343
sdn20_vowel.txt	41	B3	L	v	spectral	0.928345294355502
sdn20_vowel.txt	42	B3	L	v	spectral	1.01898589915501
sdn20_vowel.txt	43	B3	L	v	spectral	1.02325976945131
sdn20_vowel.txt	44	B3	L	v	spectral	1.01430921843327
sdn20_vowel.txt	45	B3	L	v	spectral	0.983832285420099
sdn20_vowel.txt	46	B3	L	v	spectral	1.02368989665847
sdn20_vowel.txt	47	B3	L	v	spectral	1.03219474334139
sdn20_vowel.txt	48	B3	L	v	spectral	1.00106757189382
sdn20_vowel.txt	49	B3	L	v	spectral	0.971280414349669
sdn20_vowel.txt	50	B3	L	v	spectral	1.02111364755796
sdn20_vowel.txt	51	B3	L	v	spectral	1.06142718091446
sdn20_vowel.txt	52	B3	L	v	spectral	0.961901869172101
sdn20_vowel.txt	53	B3	L	v	spectral	0.986346089875937
sdn20_vowel.txt	54	B3	L	v	spectral	0.971371342186869
sdn20_vowel.txt	55	B3	L	v	spectral	0.90568677229186
sdn20_vowel.txt	56	B3	L	v	spectral	0.989025500870351
sdn20_vowel.txt	57	B3	L	v	spectral	0.944292204501789
sdn20_vowel.txt	58	B3	L	v	spectral	0.971700210228319
sdn20_vowel.txt	59	B3	L	v	spectral	0.944706333758902
sdn20_vowel.txt	60	B3	L	v	spectral	0.899673008639139
sdn20_vowel.txt	61	B4	L	v	spectral	0.961248377333122
sdn20_vowel.txt	62	B4	L	v	spectral	0.974568744006314
sdn20_vowel.txt	63	B4	L	v	spectral	0.966454124108309
sdn20_vowel.txt	64	B4	L	v	spectral	0.996346817742799
sdn20_vowel.txt	65	B4	L	v	spectral	1.00440288697329
sdn20_vowel.txt	66	B4	L	v	spectral	0.956762601098992
sdn20_vowel.txt	67	B4	L	v	spectral	1.01994002675559
sdn20_vowel.txt	68	B4	L	v	spectral	1.0165124010435
sdn20_vowel.txt	69	B4	L	v	spectral	0.939568580566076
sdn20_vowel.txt	70	B4	L	v	spectral	0.985355928232429
sdn20_vowel.txt	71	B4	L	v	spectral	0.944793650254939
sdn20_vowel.txt	72	B4	L	v	spectral	0.95135826449932
sdn20_vowel.txt	73	B4	L	v	spectral	0.983011229452179
sdn20_vowel.txt	74	B4	L	v	spectral	0.988017684383062
sdn20_vowel.txt	75	B4	L	v	spectral	0.938033222708432
sdn20_vowel.txt	76	B4	L	v	spectral	0.94327190674319
sdn20_vowel.txt	77	B4	L	v	spectral	NA
sdn20_vowel.txt	78	B4	L	v	spectral	0.954837161995384
sdn20_vowel.txt	79	B4	L	v	spectral	1.00380682321553
sdn20_vowel.txt	80	B4	L	v	spectral	0.973241933774538
sdn20_vowel.txt	81	B5	L	v	spectral	0.928779422438534
sdn20_vowel.txt	82	B5	L	v	spectral	0.926153250964162
sdn20_vowel.txt	83	B5	L	v	spectral	0.963313607976822
sdn20_vowel.txt	84	B5	L	v	spectral	0.961474103521626
sdn20_vowel.txt	85	B5	L	v	spectral	0.959922256451526
sdn20_vowel.txt	86	B5	L	v	spectral	0.924482113859374
sdn20_vowel.txt	87	B5	L	v	spectral	0.994911477133818
sdn20_vowel.txt	88	B5	L	v	spectral	0.961030596406179
sdn20_vowel.txt	89	B5	L	v	spectral	NA
sdn20_vowel.txt	90	B5	L	v	spectral	0.994804780440938
sdn20_vowel.txt	91	B5	L	v	spectral	0.975187859104586
sdn20_vowel.txt	92	B5	L	v	spectral	0.960468460435627
sdn20_vowel.txt	93	B5	L	v	spectral	0.947526270636204
sdn20_vowel.txt	94	B5	L	v	spectral	0.914268704468415
sdn20_vowel.txt	95	B5	L	v	spectral	0.99215059868745
sdn20_vowel.txt	96	B5	L	v	spectral	0.938312101500556
sdn20_vowel.txt	97	B5	L	v	spectral	0.948645173486711
sdn20_vowel.txt	98	B5	L	v	spectral	0.972746056619068
sdn20_vowel.txt	99	B5	L	v	spectral	0.93866641879256
sdn20_vowel.txt	100	B5	L	v	spectral	0.939815751582083
uga06_vowel.txt	1	B1	R	v	spectral	NA
uga06_vowel.txt	2	B1	R	v	spectral	0.97117904708033
uga06_vowel.txt	3	B1	R	v	spectral	1.00449998764999
uga06_vowel.txt	4	B1	R	v	spectral	1.00021359709455
uga06_vowel.txt	5	B1	R	v	spectral	0.983557134953834
uga06_vowel.txt	6	B1	R	v	spectral	1.04190561637816
uga06_vowel.txt	7	B1	R	v	spectral	1.00996863638198
uga06_vowel.txt	8	B1	R	v	spectral	0.998737091580097
uga06_vowel.txt	9	B1	R	v	spectral	1.0136941871769
uga06_vowel.txt	10	B1	R	v	spectral	1.03413616307413
uga06_vowel.txt	11	B1	R	v	spectral	1.00234601200784
uga06_vowel.txt	12	B1	R	v	spectral	0.978686363655226
uga06_vowel.txt	13	B1	R	v	spectral	0.965722260662996
uga06_vowel.txt	14	B1	R	v	spectral	0.980296168477275
uga06_vowel.txt	15	B1	R	v	spectral	0.986415568302623
uga06_vowel.txt	16	B1	R	v	spectral	1.00572016167236
uga06_vowel.txt	17	B1	R	v	spectral	0.987016875793431
uga06_vowel.txt	18	B1	R	v	spectral	0.983590236902284
uga06_vowel.txt	19	B1	R	v	spectral	1.02351530640995
uga06_vowel.txt	20	B1	R	v	spectral	1.02879958474606
uga06_vowel.txt	21	B2	R	v	spectral	0.989430701091611
uga06_vowel.txt	22	B2	R	v	spectral	NA
uga06_vowel.txt	23	B2	R	v	spectral	0.965044965919509
uga06_vowel.txt	24	B2	R	v	spectral	1.01890085703681
uga06_vowel.txt	25	B2	R	v	spectral	0.990970328949217
uga06_vowel.txt	26	B2	R	v	spectral	0.98474688998717
uga06_vowel.txt	27	B2	R	v	spectral	0.976346901332584
uga06_vowel.txt	28	B2	R	v	spectral	1.01720752963557
uga06_vowel.txt	29	B2	R	v	spectral	1.04272159815769
uga06_vowel.txt	30	B2	R	v	spectral	1.05004301795383
uga06_vowel.txt	31	B2	R	v	spectral	1.05192335528391
uga06_vowel.txt	32	B2	R	v	spectral	0.99776321719587
uga06_vowel.txt	33	B2	R	v	spectral	1.00085506448384
uga06_vowel.txt	34	B2	R	v	spectral	1.01697372569376
uga06_vowel.txt	35	B2	R	v	spectral	1.00900722553823
uga06_vowel.txt	36	B2	R	v	spectral	0.986639898527511
uga06_vowel.txt	37	B2	R	v	spectral	1.00111975300407
uga06_vowel.txt	38	B2	R	v	spectral	1.00219170453416
uga06_vowel.txt	39	B2	R	v	spectral	1.00526430954312
uga06_vowel.txt	40	B2	R	v	spectral	1.02533633704666
uga06_vowel.txt	41	B3	R	v	spectral	1.01046482968643
uga06_vowel.txt	42	B3	R	v	spectral	1.00582658798788
uga06_vowel.txt	43	B3	R	v	spectral	1.01879841547825
uga06_vowel.txt	44	B3	R	v	spectral	1.00051194723948
uga06_vowel.txt	45	B3	R	v	spectral	1.00438437436095
uga06_vowel.txt	46	B3	R	v	spectral	0.987615940268878
uga06_vowel.txt	47	B3	R	v	spectral	NA
uga06_vowel.txt	48	B3	R	v	spectral	NA
uga06_vowel.txt	49	B3	R	v	spectral	NA
uga06_vowel.txt	50	B3	R	v	spectral	0.997246097238683
uga06_vowel.txt	51	B3	R	v	spectral	0.987392529599152
uga06_vowel.txt	52	B3	R	v	spectral	0.962033683563335
uga06_vowel.txt	53	B3	R	v	spectral	0.983786477110181
uga06_vowel.txt	54	B3	R	v	spectral	0.991089773835327
uga06_vowel.txt	55	B3	R	v	spectral	0.973222792361188
uga06_vowel.txt	56	B3	R	v	spectral	0.971241474645538
uga06_vowel.txt	57	B3	R	v	spectral	0.974664175125463
uga06_vowel.txt	58	B3	R	v	spectral	NA
uga06_vowel.txt	59	B3	R	v	spectral	0.969919206746912
uga06_vowel.txt	60	B3	R	v	spectral	0.990375621290838
uga06_vowel.txt	61	B4	R	v	spectral	0.989589343627493
uga06_vowel.txt	62	B4	R	v	spectral	0.985745452054082
uga06_vowel.txt	63	B4	R	v	spectral	1.00141640192401
uga06_vowel.txt	64	B4	R	v	spectral	0.970460453968035
uga06_vowel.txt	65	B4	R	v	spectral	1.00685056420784
uga06_vowel.txt	66	B4	R	v	spectral	0.956185585808999
uga06_vowel.txt	67	B4	R	v	spectral	0.973347160779552
uga06_vowel.txt	68	B4	R	v	spectral	0.958721863006313
uga06_vowel.txt	69	B4	R	v	spectral	1.01468195398245
uga06_vowel.txt	70	B4	R	v	spectral	0.978054004651326
uga06_vowel.txt	71	B4	R	v	spectral	0.940070913681136
uga06_vowel.txt	72	B4	R	v	spectral	0.939839694405478
uga06_vowel.txt	73	B4	R	v	spectral	0.978745934886578
uga06_vowel.txt	74	B4	R	v	spectral	0.975342745346849
uga06_vowel.txt	75	B4	R	v	spectral	0.933140743445921
uga06_vowel.txt	76	B4	R	v	spectral	0.91375823517033
uga06_vowel.txt	77	B4	R	v	spectral	0.944132213767442
uga06_vowel.txt	78	B4	R	v	spectral	0.947334401849949
uga06_vowel.txt	79	B4	R	v	spectral	0.985336558307987
uga06_vowel.txt	80	B4	R	v	spectral	0.919873181081732
uga06_vowel.txt	81	B5	R	v	spectral	0.989078943816575
uga06_vowel.txt	82	B5	R	v	spectral	1.00261124816473
uga06_vowel.txt	83	B5	R	v	spectral	0.951881710346257
uga06_vowel.txt	84	B5	R	v	spectral	0.965851022275095
uga06_vowel.txt	85	B5	R	v	spectral	0.982701485522678
uga06_vowel.txt	86	B5	R	v	spectral	0.965699152573716
uga06_vowel.txt	87	B5	R	v	spectral	0.947399689920349
uga06_vowel.txt	88	B5	R	v	spectral	0.984666649732605
uga06_vowel.txt	89	B5	R	v	spectral	1.00124588263786
uga06_vowel.txt	90	B5	R	v	spectral	0.948889759199386
uga06_vowel.txt	91	B5	R	v	spectral	0.971028954794622
uga06_vowel.txt	92	B5	R	v	spectral	0.946670402915977
uga06_vowel.txt	93	B5	R	v	spectral	0.966969183456347
uga06_vowel.txt	94	B5	R	v	spectral	0.967906081645545
uga06_vowel.txt	95	B5	R	v	spectral	0.988388719775762
uga06_vowel.txt	96	B5	R	v	spectral	0.980403142617482
uga06_vowel.txt	97	B5	R	v	spectral	0.965797522879564
uga06_vowel.txt	98	B5	R	v	spectral	0.949059248653676
uga06_vowel.txt	99	B5	R	v	spectral	0.960981400680182
uga06_vowel.txt	100	B5	R	v	spectral	0.962486928418263
uga06_vowel.txt	1	B1	L	v	spectral	0.982273776777541
uga06_vowel.txt	2	B1	L	v	spectral	1.01904435661399
uga06_vowel.txt	3	B1	L	v	spectral	1.01621746345087
uga06_vowel.txt	4	B1	L	v	spectral	0.997733458145678
uga06_vowel.txt	5	B1	L	v	spectral	1.0211719785334
uga06_vowel.txt	6	B1	L	v	spectral	1.0100841480926
uga06_vowel.txt	7	B1	L	v	spectral	1.00436024043607
uga06_vowel.txt	8	B1	L	v	spectral	0.983656583365538
uga06_vowel.txt	9	B1	L	v	spectral	0.981430302665631
uga06_vowel.txt	10	B1	L	v	spectral	1.01064042533453
uga06_vowel.txt	11	B1	L	v	spectral	1.00606898356928
uga06_vowel.txt	12	B1	L	v	spectral	1.02459814724851
uga06_vowel.txt	13	B1	L	v	spectral	0.966357843083319
uga06_vowel.txt	14	B1	L	v	spectral	1.02282294996211
uga06_vowel.txt	15	B1	L	v	spectral	NA
uga06_vowel.txt	16	B1	L	v	spectral	0.999285161149918
uga06_vowel.txt	17	B1	L	v	spectral	0.962722421857314
uga06_vowel.txt	18	B1	L	v	spectral	0.978999547471145
uga06_vowel.txt	19	B1	L	v	spectral	1.00973551263803
uga06_vowel.txt	20	B1	L	v	spectral	1.00279669960452
uga06_vowel.txt	21	B2	L	v	spectral	0.97068908168587
uga06_vowel.txt	22	B2	L	v	spectral	0.948420454644838
uga06_vowel.txt	23	B2	L	v	spectral	NA
uga06_vowel.txt	24	B2	L	v	spectral	0.973324875450254
uga06_vowel.txt	25	B2	L	v	spectral	0.944580190938101
uga06_vowel.txt	26	B2	L	v	spectral	0.996977284568379
uga06_vowel.txt	27	B2	L	v	spectral	0.986051772298243
uga06_vowel.txt	28	B2	L	v	spectral	1.03306942524943
uga06_vowel.txt	29	B2	L	v	spectral	1.02151887585992
uga06_vowel.txt	30	B2	L	v	spectral	1.01756370005656
uga06_vowel.txt	31	B2	L	v	spectral	0.984635594212972
uga06_vowel.txt	32	B2	L	v	spectral	1.022171219379
uga06_vowel.txt	33	B2	L	v	spectral	0.997018979719872
uga06_vowel.txt	34	B2	L	v	spectral	0.965166254585846
uga06_vowel.txt	35	B2	L	v	spectral	0.92638754919632
uga06_vowel.txt	36	B2	L	v	spectral	0.990633348547844
uga06_vowel.txt	37	B2	L	v	spectral	0.971031284146987
uga06_vowel.txt	38	B2	L	v	spectral	1.01101937211167
uga06_vowel.txt	39	B2	L	v	spectral	0.947249486739992
uga06_vowel.txt	40	B2	L	v	spectral	0.982621281193666
uga06_vowel.txt	41	B3	L	v	spectral	0.943519569474241
uga06_vowel.txt	42	B3	L	v	spectral	0.956522692941647
uga06_vowel.txt	43	B3	L	v	spectral	0.976280475389679
uga06_vowel.txt	44	B3	L	v	spectral	1.02229962213022
uga06_vowel.txt	45	B3	L	v	spectral	0.988943509310286
uga06_vowel.txt	46	B3	L	v	spectral	1.03702063158802
uga06_vowel.txt	47	B3	L	v	spectral	1.01709634218069
uga06_vowel.txt	48	B3	L	v	spectral	NA
uga06_vowel.txt	49	B3	L	v	spectral	0.999903577382897
uga06_vowel.txt	50	B3	L	v	spectral	0.989285442242414
uga06_vowel.txt	51	B3	L	v	spectral	1.02057569312156
uga06_vowel.txt	52	B3	L	v	spectral	0.983220721195727
uga06_vowel.txt	53	B3	L	v	spectral	0.949605182835328
uga06_vowel.txt	54	B3	L	v	spectral	0.974745378385599
uga06_vowel.txt	55	B3	L	v	spectral	0.96711111639868
uga06_vowel.txt	56	B3	L	v	spectral	0.960681478676344
uga06_vowel.txt	57	B3	L	v	spectral	0.9622174648121
uga06_vowel.txt	58	B3	L	v	spectral	1.00972832514883
uga06_vowel.txt	59	B3	L	v	spectral	0.96788622544053
uga06_vowel.txt	60	B3	L	v	spectral	1.02443133017765
uga06_vowel.txt	61	B4	L	v	spectral	0.995850526506067
uga06_vowel.txt	62	B4	L	v	spectral	0.964550488675044
uga06_vowel.txt	63	B4	L	v	spectral	0.96086510640593
uga06_vowel.txt	64	B4	L	v	spectral	0.975745047818747
uga06_vowel.txt	66	B4	L	v	spectral	NA
uga06_vowel.txt	67	B4	L	v	spectral	0.945099962935069
uga06_vowel.txt	68	B4	L	v	spectral	0.975778242810833
uga06_vowel.txt	69	B4	L	v	spectral	0.92289929604714
uga06_vowel.txt	70	B4	L	v	spectral	0.956071384888165
uga06_vowel.txt	71	B4	L	v	spectral	0.959282226617522
uga06_vowel.txt	72	B4	L	v	spectral	0.951705352306977
uga06_vowel.txt	73	B4	L	v	spectral	0.963007416473287
uga06_vowel.txt	74	B4	L	v	spectral	0.962474448810583
uga06_vowel.txt	75	B4	L	v	spectral	0.934152129372919
uga06_vowel.txt	76	B4	L	v	spectral	NA
uga06_vowel.txt	77	B4	L	v	spectral	0.920971817071249
uga06_vowel.txt	78	B4	L	v	spectral	0.950108851017803
uga06_vowel.txt	79	B4	L	v	spectral	0.929587845141722
uga06_vowel.txt	80	B4	L	v	spectral	0.931497826274009
uga06_vowel.txt	81	B5	L	v	spectral	0.974755956891239
uga06_vowel.txt	82	B5	L	v	spectral	1.01604444271858
uga06_vowel.txt	83	B5	L	v	spectral	0.981440808613983
uga06_vowel.txt	84	B5	L	v	spectral	1.0170029950994
uga06_vowel.txt	85	B5	L	v	spectral	0.972816398722015
uga06_vowel.txt	86	B5	L	v	spectral	0.981772799346843
uga06_vowel.txt	87	B5	L	v	spectral	0.96824908705538
uga06_vowel.txt	88	B5	L	v	spectral	NA
uga06_vowel.txt	89	B5	L	v	spectral	NA
uga06_vowel.txt	90	B5	L	v	spectral	0.990803329609899
uga06_vowel.txt	91	B5	L	v	spectral	0.941287636168194
uga06_vowel.txt	92	B5	L	v	spectral	0.949254882289158
uga06_vowel.txt	93	B5	L	v	spectral	0.944869349990158
uga06_vowel.txt	94	B5	L	v	spectral	0.99209108790279
uga06_vowel.txt	95	B5	L	v	spectral	0.958797988484377
uga06_vowel.txt	96	B5	L	v	spectral	0.984126039450997
uga06_vowel.txt	97	B5	L	v	spectral	0.957864907504403
uga06_vowel.txt	98	B5	L	v	spectral	0.978463352313646
uga06_vowel.txt	99	B5	L	v	spectral	0.971858328482948
uga06_vowel.txt	100	B5	L	v	spectral	0.968898115183449
aba08_vowel_neu.txt	1	B1	R	f	spectral	1.07916615605944
aba08_vowel_neu.txt	2	B1	R	f	spectral	1.08370085228003
aba08_vowel_neu.txt	3	B1	R	f	spectral	1.10020613172324
aba08_vowel_neu.txt	4	B1	R	f	spectral	1.04015793568405
aba08_vowel_neu.txt	5	B1	R	f	spectral	1.08950588072132
aba08_vowel_neu.txt	6	B1	R	f	spectral	1.00459243738375
aba08_vowel_neu.txt	7	B1	R	f	spectral	1.0433930261699
aba08_vowel_neu.txt	8	B1	R	f	spectral	0.969036582256331
aba08_vowel_neu.txt	9	B1	R	f	spectral	0.970287537029626
aba08_vowel_neu.txt	10	B1	R	f	spectral	0.955185700540277
aba08_vowel_neu.txt	11	B1	R	f	spectral	0.924218059347317
aba08_vowel_neu.txt	12	B1	R	f	spectral	0.954304277017457
aba08_vowel_neu.txt	13	B1	R	f	spectral	0.959740549041853
aba08_vowel_neu.txt	14	B1	R	f	spectral	0.970199762241508
aba08_vowel_neu.txt	15	B1	R	f	spectral	1.01585640216524
aba08_vowel_neu.txt	16	B1	R	f	spectral	0.895690987822416
aba08_vowel_neu.txt	17	B1	R	f	spectral	0.96248108767541
aba08_vowel_neu.txt	18	B1	R	f	spectral	0.935434724992615
aba08_vowel_neu.txt	19	B1	R	f	spectral	0.946509436070595
aba08_vowel_neu.txt	20	B1	R	f	spectral	1.10033247377762
aba08_vowel_neu.txt	21	B2	R	f	spectral	0.925527253007003
aba08_vowel_neu.txt	22	B2	R	f	spectral	NA
aba08_vowel_neu.txt	23	B2	R	f	spectral	1.02016747879487
aba08_vowel_neu.txt	24	B2	R	f	spectral	0.994274956312912
aba08_vowel_neu.txt	25	B2	R	f	spectral	0.962875711226948
aba08_vowel_neu.txt	26	B2	R	f	spectral	0.94099390507056
aba08_vowel_neu.txt	27	B2	R	f	spectral	0.963518162319305
aba08_vowel_neu.txt	28	B2	R	f	spectral	0.888025863742151
aba08_vowel_neu.txt	29	B2	R	f	spectral	0.952285649331102
aba08_vowel_neu.txt	30	B2	R	f	spectral	0.898756840606472
aba08_vowel_neu.txt	31	B2	R	f	spectral	0.868213985963786
aba08_vowel_neu.txt	32	B2	R	f	spectral	0.867027743305001
aba08_vowel_neu.txt	33	B2	R	f	spectral	0.949558488889934
aba08_vowel_neu.txt	34	B2	R	f	spectral	0.914968151422562
aba08_vowel_neu.txt	35	B2	R	f	spectral	0.894706518453923
aba08_vowel_neu.txt	36	B2	R	f	spectral	0.93094748880671
aba08_vowel_neu.txt	37	B2	R	f	spectral	0.992419200947824
aba08_vowel_neu.txt	38	B2	R	f	spectral	0.959436539152839
aba08_vowel_neu.txt	39	B2	R	f	spectral	0.894803991869926
aba08_vowel_neu.txt	40	B2	R	f	spectral	0.831527462757745
aba08_vowel_neu.txt	41	B3	R	f	spectral	0.95969203377318
aba08_vowel_neu.txt	42	B3	R	f	spectral	0.876608616724112
aba08_vowel_neu.txt	43	B3	R	f	spectral	0.908370732187891
aba08_vowel_neu.txt	44	B3	R	f	spectral	0.809856175611336
aba08_vowel_neu.txt	45	B3	R	f	spectral	0.921843634587791
aba08_vowel_neu.txt	46	B3	R	f	spectral	0.827502604467021
aba08_vowel_neu.txt	47	B3	R	f	spectral	0.846284544565065
aba08_vowel_neu.txt	48	B3	R	f	spectral	0.920395550605756
aba08_vowel_neu.txt	49	B3	R	f	spectral	0.873548318226475
aba08_vowel_neu.txt	50	B3	R	f	spectral	0.889667000040315
aba08_vowel_neu.txt	51	B3	R	f	spectral	0.890908933746014
aba08_vowel_neu.txt	52	B3	R	f	spectral	0.886957877932299
aba08_vowel_neu.txt	53	B3	R	f	spectral	0.777240773341315
aba08_vowel_neu.txt	54	B3	R	f	spectral	0.825718082971383
aba08_vowel_neu.txt	55	B3	R	f	spectral	0.847134317265661
aba08_vowel_neu.txt	56	B3	R	f	spectral	0.893996284904086
aba08_vowel_neu.txt	57	B3	R	f	spectral	0.898978551415975
aba08_vowel_neu.txt	58	B3	R	f	spectral	0.902903847378906
aba08_vowel_neu.txt	59	B3	R	f	spectral	0.765217674138069
aba08_vowel_neu.txt	60	B3	R	f	spectral	NA
aba08_vowel_neu.txt	61	B4	R	f	spectral	0.757969242583152
aba08_vowel_neu.txt	62	B4	R	f	spectral	0.843489437695711
aba08_vowel_neu.txt	63	B4	R	f	spectral	0.875278904644812
aba08_vowel_neu.txt	64	B4	R	f	spectral	0.830466510024516
aba08_vowel_neu.txt	65	B4	R	f	spectral	NA
aba08_vowel_neu.txt	66	B4	R	f	spectral	0.834314145526754
aba08_vowel_neu.txt	67	B4	R	f	spectral	0.815288285714977
aba08_vowel_neu.txt	68	B4	R	f	spectral	0.737376727893794
aba08_vowel_neu.txt	69	B4	R	f	spectral	0.825327324452744
aba08_vowel_neu.txt	70	B4	R	f	spectral	0.822660532494685
aba08_vowel_neu.txt	71	B4	R	f	spectral	0.899098690579523
aba08_vowel_neu.txt	72	B4	R	f	spectral	0.845631299241579
aba08_vowel_neu.txt	73	B4	R	f	spectral	0.834089914229123
aba08_vowel_neu.txt	74	B4	R	f	spectral	0.811110662825535
aba08_vowel_neu.txt	75	B4	R	f	spectral	0.817266068676216
aba08_vowel_neu.txt	76	B4	R	f	spectral	0.774711326349849
aba08_vowel_neu.txt	77	B4	R	f	spectral	0.830001158826285
aba08_vowel_neu.txt	78	B4	R	f	spectral	0.763880151472226
aba08_vowel_neu.txt	79	B4	R	f	spectral	0.810040691120731
aba08_vowel_neu.txt	80	B4	R	f	spectral	0.813104155127158
aba08_vowel_neu.txt	81	B5	R	f	spectral	0.86714250200014
aba08_vowel_neu.txt	82	B5	R	f	spectral	0.918649367552781
aba08_vowel_neu.txt	83	B5	R	f	spectral	0.836558560611641
aba08_vowel_neu.txt	84	B5	R	f	spectral	0.922540328216287
aba08_vowel_neu.txt	85	B5	R	f	spectral	0.847870743615134
aba08_vowel_neu.txt	86	B5	R	f	spectral	0.871167210737365
aba08_vowel_neu.txt	87	B5	R	f	spectral	0.843349229308307
aba08_vowel_neu.txt	88	B5	R	f	spectral	0.877796177570643
aba08_vowel_neu.txt	89	B5	R	f	spectral	0.849645246688045
aba08_vowel_neu.txt	90	B5	R	f	spectral	0.847166313179022
aba08_vowel_neu.txt	91	B5	R	f	spectral	0.817032259946709
aba08_vowel_neu.txt	92	B5	R	f	spectral	0.917351459614461
aba08_vowel_neu.txt	93	B5	R	f	spectral	0.804660539791007
aba08_vowel_neu.txt	94	B5	R	f	spectral	NA
aba08_vowel_neu.txt	95	B5	R	f	spectral	0.78421160038645
aba08_vowel_neu.txt	96	B5	R	f	spectral	0.949849913651562
aba08_vowel_neu.txt	97	B5	R	f	spectral	0.935983654629397
aba08_vowel_neu.txt	98	B5	R	f	spectral	0.900560452180778
aba08_vowel_neu.txt	99	B5	R	f	spectral	0.84377106509407
aba08_vowel_neu.txt	100	B5	R	f	spectral	0.946264698037614
aba08_vowel_neu.txt	1	B1	L	f	spectral	0.966176065445129
aba08_vowel_neu.txt	2	B1	L	f	spectral	1.01323228073845
aba08_vowel_neu.txt	3	B1	L	f	spectral	1.1283236253782
aba08_vowel_neu.txt	4	B1	L	f	spectral	1.09780936689367
aba08_vowel_neu.txt	5	B1	L	f	spectral	1.02665872194951
aba08_vowel_neu.txt	6	B1	L	f	spectral	1.07173006239524
aba08_vowel_neu.txt	7	B1	L	f	spectral	1.00855130646104
aba08_vowel_neu.txt	8	B1	L	f	spectral	0.942772445037243
aba08_vowel_neu.txt	9	B1	L	f	spectral	0.982463872576692
aba08_vowel_neu.txt	10	B1	L	f	spectral	1.0227537766222
aba08_vowel_neu.txt	11	B1	L	f	spectral	NA
aba08_vowel_neu.txt	12	B1	L	f	spectral	1.02148550978073
aba08_vowel_neu.txt	13	B1	L	f	spectral	0.923175395415132
aba08_vowel_neu.txt	14	B1	L	f	spectral	0.944551213759002
aba08_vowel_neu.txt	15	B1	L	f	spectral	1.00602013290242
aba08_vowel_neu.txt	16	B1	L	f	spectral	1.083491572858
aba08_vowel_neu.txt	17	B1	L	f	spectral	1.05280131471441
aba08_vowel_neu.txt	18	B1	L	f	spectral	0.920634361247864
aba08_vowel_neu.txt	19	B1	L	f	spectral	0.886004867874329
aba08_vowel_neu.txt	20	B1	L	f	spectral	0.901364107950737
aba08_vowel_neu.txt	21	B2	L	f	spectral	0.885070508843619
aba08_vowel_neu.txt	22	B2	L	f	spectral	0.966887133975566
aba08_vowel_neu.txt	23	B2	L	f	spectral	1.06505026112731
aba08_vowel_neu.txt	24	B2	L	f	spectral	0.941762308960256
aba08_vowel_neu.txt	25	B2	L	f	spectral	1.05670231678947
aba08_vowel_neu.txt	26	B2	L	f	spectral	0.969495298894463
aba08_vowel_neu.txt	27	B2	L	f	spectral	1.06350435310664
aba08_vowel_neu.txt	28	B2	L	f	spectral	1.00982599603812
aba08_vowel_neu.txt	29	B2	L	f	spectral	0.870152886660084
aba08_vowel_neu.txt	30	B2	L	f	spectral	1.01411130968098
aba08_vowel_neu.txt	31	B2	L	f	spectral	1.01249810732516
aba08_vowel_neu.txt	32	B2	L	f	spectral	0.853788444865488
aba08_vowel_neu.txt	33	B2	L	f	spectral	0.930281206197118
aba08_vowel_neu.txt	34	B2	L	f	spectral	0.927064002611899
aba08_vowel_neu.txt	35	B2	L	f	spectral	1.03412733104324
aba08_vowel_neu.txt	36	B2	L	f	spectral	1.02300116760081
aba08_vowel_neu.txt	37	B2	L	f	spectral	0.88757781647041
aba08_vowel_neu.txt	38	B2	L	f	spectral	0.993096530342349
aba08_vowel_neu.txt	39	B2	L	f	spectral	1.02526380351492
aba08_vowel_neu.txt	40	B2	L	f	spectral	0.830988265585225
aba08_vowel_neu.txt	41	B3	L	f	spectral	0.937145912653692
aba08_vowel_neu.txt	42	B3	L	f	spectral	0.837984416590174
aba08_vowel_neu.txt	43	B3	L	f	spectral	0.90066447116542
aba08_vowel_neu.txt	44	B3	L	f	spectral	0.757555268057458
aba08_vowel_neu.txt	45	B3	L	f	spectral	0.800264478193704
aba08_vowel_neu.txt	46	B3	L	f	spectral	0.905983496565741
aba08_vowel_neu.txt	47	B3	L	f	spectral	0.831006138578556
aba08_vowel_neu.txt	48	B3	L	f	spectral	0.877887375528682
aba08_vowel_neu.txt	49	B3	L	f	spectral	0.793860175737562
aba08_vowel_neu.txt	50	B3	L	f	spectral	NA
aba08_vowel_neu.txt	51	B3	L	f	spectral	0.86248592836694
aba08_vowel_neu.txt	52	B3	L	f	spectral	0.779327280420424
aba08_vowel_neu.txt	53	B3	L	f	spectral	0.816224274428704
aba08_vowel_neu.txt	54	B3	L	f	spectral	0.924392222310852
aba08_vowel_neu.txt	55	B3	L	f	spectral	0.846187919792027
aba08_vowel_neu.txt	56	B3	L	f	spectral	0.929501867861589
aba08_vowel_neu.txt	57	B3	L	f	spectral	0.814290514896605
aba08_vowel_neu.txt	58	B3	L	f	spectral	0.957603139172628
aba08_vowel_neu.txt	59	B3	L	f	spectral	0.939316103256451
aba08_vowel_neu.txt	60	B3	L	f	spectral	0.837844361528876
aba08_vowel_neu.txt	61	B4	L	f	spectral	0.930568589285401
aba08_vowel_neu.txt	62	B4	L	f	spectral	0.841944634007697
aba08_vowel_neu.txt	63	B4	L	f	spectral	0.803845915207384
aba08_vowel_neu.txt	64	B4	L	f	spectral	0.792977705337527
aba08_vowel_neu.txt	65	B4	L	f	spectral	0.888338050114604
aba08_vowel_neu.txt	66	B4	L	f	spectral	0.799501343217399
aba08_vowel_neu.txt	67	B4	L	f	spectral	0.872973149100225
aba08_vowel_neu.txt	68	B4	L	f	spectral	0.83295516230695
aba08_vowel_neu.txt	69	B4	L	f	spectral	0.75642653590275
aba08_vowel_neu.txt	70	B4	L	f	spectral	0.709707557362101
aba08_vowel_neu.txt	71	B4	L	f	spectral	0.86543921843519
aba08_vowel_neu.txt	72	B4	L	f	spectral	0.973931367430699
aba08_vowel_neu.txt	73	B4	L	f	spectral	0.759927157208314
aba08_vowel_neu.txt	74	B4	L	f	spectral	0.934041383157457
aba08_vowel_neu.txt	75	B4	L	f	spectral	0.832781005575378
aba08_vowel_neu.txt	76	B4	L	f	spectral	0.858964874747482
aba08_vowel_neu.txt	77	B4	L	f	spectral	0.941015053380752
aba08_vowel_neu.txt	78	B4	L	f	spectral	0.854033316655883
aba08_vowel_neu.txt	79	B4	L	f	spectral	0.838560228216879
aba08_vowel_neu.txt	80	B4	L	f	spectral	0.767569063154837
aba08_vowel_neu.txt	81	B5	L	f	spectral	NA
aba08_vowel_neu.txt	82	B5	L	f	spectral	0.947900103433591
aba08_vowel_neu.txt	83	B5	L	f	spectral	0.878183588802003
aba08_vowel_neu.txt	84	B5	L	f	spectral	NA
aba08_vowel_neu.txt	85	B5	L	f	spectral	0.835528438139652
aba08_vowel_neu.txt	86	B5	L	f	spectral	0.813986251593423
aba08_vowel_neu.txt	87	B5	L	f	spectral	0.836594253547884
aba08_vowel_neu.txt	88	B5	L	f	spectral	0.813983878164388
aba08_vowel_neu.txt	89	B5	L	f	spectral	0.813153226021171
aba08_vowel_neu.txt	90	B5	L	f	spectral	0.860670844766233
aba08_vowel_neu.txt	91	B5	L	f	spectral	0.843070703025429
aba08_vowel_neu.txt	92	B5	L	f	spectral	0.884694131517826
aba08_vowel_neu.txt	93	B5	L	f	spectral	0.854783030787592
aba08_vowel_neu.txt	94	B5	L	f	spectral	0.817140699410795
aba08_vowel_neu.txt	95	B5	L	f	spectral	0.816589017280422
aba08_vowel_neu.txt	96	B5	L	f	spectral	0.843266055727993
aba08_vowel_neu.txt	97	B5	L	f	spectral	0.950998715816262
aba08_vowel_neu.txt	98	B5	L	f	spectral	0.874207557775801
aba08_vowel_neu.txt	99	B5	L	f	spectral	0.821172990423563
aba08_vowel_neu.txt	100	B5	L	f	spectral	0.776027792250307
ejl18_vowel_neu.txt	1	B1	R	f	spectral	1.00767865823824
ejl18_vowel_neu.txt	2	B1	R	f	spectral	1.0611344675595
ejl18_vowel_neu.txt	3	B1	R	f	spectral	0.901499627625633
[truncated: 4,981 more rows]

## Sheet: Figure 3a
Figure 3a
VP	trial	Block	Cond	phonem	type	values			Cond	Block	type	marginal estimated mean	model derived s.e.m
asn12_vowel.txt	31	B2	0control	v	spectral	1.05496346739169			Control	perturbation run	spectral	0.991	0.005
asn12_vowel.txt	32	B2	0control	v	spectral	1.04030212873165			Control	pertubation run	temporal	1005	0.005
asn12_vowel.txt	33	B2	0control	v	spectral	1.06792830489603			manipulated	perturbation run	spectral	0.989	0.006
asn12_vowel.txt	34	B2	0control	v	spectral	1.04133751939126			manipulated	perturbation run	temporal	0.969	0.006
asn12_vowel.txt	35	B2	0control	v	spectral	1.07016791878449
asn12_vowel.txt	36	B2	0control	v	spectral	1.01941346236092
asn12_vowel.txt	37	B2	0control	v	spectral	0.99290125049733
asn12_vowel.txt	38	B2	0control	v	spectral	1.07516508466366
asn12_vowel.txt	39	B2	0control	v	spectral	1.11254494448465
asn12_vowel.txt	40	B2	0control	v	spectral	1.0897977020447
asn12_vowel.txt	41	B2	0control	v	spectral	1.02503064513805
asn12_vowel.txt	42	B2	0control	v	spectral	1.08027606476776
asn12_vowel.txt	43	B2	0control	v	spectral	NA
asn12_vowel.txt	44	B2	0control	v	spectral	NA
asn12_vowel.txt	45	B2	0control	v	spectral	1.05116409444699
asn12_vowel.txt	46	B2	0control	v	spectral	1.07941423685784
asn12_vowel.txt	47	B2	0control	v	spectral	1.06870962803092
asn12_vowel.txt	48	B2	0control	v	spectral	1.09950532494651
asn12_vowel.txt	49	B2	0control	v	spectral	1.08558240262352
asn12_vowel.txt	50	B2	0control	v	spectral	1.1038113365679
asn12_vowel.txt	51	B2	0control	v	spectral	1.17247304139275
asn12_vowel.txt	52	B2	0control	v	spectral	1.1599537984042
asn12_vowel.txt	53	B2	0control	v	spectral	1.01612210769056
asn12_vowel.txt	54	B2	0control	v	spectral	1.02405966288186
asn12_vowel.txt	55	B2	0control	v	spectral	1.10091536787712
asn12_vowel.txt	56	B2	0control	v	spectral	1.07544205612525
asn12_vowel.txt	57	B2	0control	v	spectral	1.05130298941227
asn12_vowel.txt	58	B2	0control	v	spectral	1.05646895013568
asn12_vowel.txt	59	B2	0control	v	spectral	1.12040102441805
asn12_vowel.txt	60	B2	0control	v	spectral	1.15848951830474
asn12_vowel.txt	31	B2	manipulated	v	spectral	1.08712612691164
asn12_vowel.txt	32	B2	manipulated	v	spectral	0.96088243295753
asn12_vowel.txt	33	B2	manipulated	v	spectral	1.01785356902548
asn12_vowel.txt	34	B2	manipulated	v	spectral	1.01608236743541
asn12_vowel.txt	35	B2	manipulated	v	spectral	1.07333600042277
asn12_vowel.txt	36	B2	manipulated	v	spectral	1.14398308994279
asn12_vowel.txt	37	B2	manipulated	v	spectral	1.00356201634698
asn12_vowel.txt	38	B2	manipulated	v	spectral	NA
asn12_vowel.txt	39	B2	manipulated	v	spectral	1.05265827613682
asn12_vowel.txt	40	B2	manipulated	v	spectral	NA
asn12_vowel.txt	41	B2	manipulated	v	spectral	NA
asn12_vowel.txt	42	B2	manipulated	v	spectral	1.0221062144043
asn12_vowel.txt	43	B2	manipulated	v	spectral	1.02607575672891
asn12_vowel.txt	44	B2	manipulated	v	spectral	1.04432802423084
asn12_vowel.txt	45	B2	manipulated	v	spectral	1.07924065799059
asn12_vowel.txt	46	B2	manipulated	v	spectral	1.0851746607396
asn12_vowel.txt	47	B2	manipulated	v	spectral	1.06714319116966
asn12_vowel.txt	48	B2	manipulated	v	spectral	1.0557185693455
asn12_vowel.txt	49	B2	manipulated	v	spectral	1.03162735009927
asn12_vowel.txt	50	B2	manipulated	v	spectral	1.05321743611785
asn12_vowel.txt	51	B2	manipulated	v	spectral	1.05655791393647
asn12_vowel.txt	52	B2	manipulated	v	spectral	1.06599136879155
asn12_vowel.txt	53	B2	manipulated	v	spectral	1.09211717112356
asn12_vowel.txt	54	B2	manipulated	v	spectral	1.07140161958122
asn12_vowel.txt	55	B2	manipulated	v	spectral	1.06535939372523
asn12_vowel.txt	56	B2	manipulated	v	spectral	1.15838179473921
asn12_vowel.txt	57	B2	manipulated	v	spectral	1.10754561841535
asn12_vowel.txt	58	B2	manipulated	v	spectral	1.04154521125784
asn12_vowel.txt	59	B2	manipulated	v	spectral	1.05144327299717
asn12_vowel.txt	60	B2	manipulated	v	spectral	1.05800312558528
bhk23_vowel.txt	31	B2	0control	v	spectral	0.998191980638627
bhk23_vowel.txt	32	B2	0control	v	spectral	0.946181419980109
bhk23_vowel.txt	33	B2	0control	v	spectral	1.06080427572602
bhk23_vowel.txt	34	B2	0control	v	spectral	0.931839512714325
bhk23_vowel.txt	35	B2	0control	v	spectral	0.981716960439569
bhk23_vowel.txt	36	B2	0control	v	spectral	0.979435110169721
bhk23_vowel.txt	37	B2	0control	v	spectral	NA
bhk23_vowel.txt	38	B2	0control	v	spectral	0.979088444727866
bhk23_vowel.txt	39	B2	0control	v	spectral	0.870228410326901
bhk23_vowel.txt	40	B2	0control	v	spectral	0.938358666417372
bhk23_vowel.txt	42	B2	0control	v	spectral	0.919974455768885
bhk23_vowel.txt	43	B2	0control	v	spectral	0.981582392782849
bhk23_vowel.txt	45	B2	0control	v	spectral	0.912814025473243
bhk23_vowel.txt	46	B2	0control	v	spectral	0.96195278965068
bhk23_vowel.txt	47	B2	0control	v	spectral	0.919839448702761
bhk23_vowel.txt	48	B2	0control	v	spectral	0.897209353488352
bhk23_vowel.txt	49	B2	0control	v	spectral	0.838483271649779
bhk23_vowel.txt	50	B2	0control	v	spectral	0.882646638151718
bhk23_vowel.txt	51	B2	0control	v	spectral	0.837177748264454
bhk23_vowel.txt	52	B2	0control	v	spectral	0.922601809614956
bhk23_vowel.txt	53	B2	0control	v	spectral	0.873722562079004
bhk23_vowel.txt	54	B2	0control	v	spectral	0.859620877900718
bhk23_vowel.txt	55	B2	0control	v	spectral	0.779554249119644
bhk23_vowel.txt	56	B2	0control	v	spectral	NA
bhk23_vowel.txt	57	B2	0control	v	spectral	0.919987830999019
bhk23_vowel.txt	58	B2	0control	v	spectral	0.888886648253638
bhk23_vowel.txt	59	B2	0control	v	spectral	0.976231173306595
bhk23_vowel.txt	60	B2	0control	v	spectral	0.888375037000638
bhk23_vowel.txt	31	B2	manipulated	v	spectral	0.969163099991199
bhk23_vowel.txt	32	B2	manipulated	v	spectral	0.938102973461771
bhk23_vowel.txt	33	B2	manipulated	v	spectral	0.875942470522666
bhk23_vowel.txt	34	B2	manipulated	v	spectral	0.827650435232786
bhk23_vowel.txt	35	B2	manipulated	v	spectral	0.992989085487757
bhk23_vowel.txt	36	B2	manipulated	v	spectral	1.07634689904266
bhk23_vowel.txt	37	B2	manipulated	v	spectral	1.0682088869425
bhk23_vowel.txt	38	B2	manipulated	v	spectral	0.989166450737463
bhk23_vowel.txt	39	B2	manipulated	v	spectral	0.99880121569363
bhk23_vowel.txt	40	B2	manipulated	v	spectral	0.90826688937678
bhk23_vowel.txt	41	B2	manipulated	v	spectral	0.969631878674722
bhk23_vowel.txt	42	B2	manipulated	v	spectral	0.950356193884776
bhk23_vowel.txt	43	B2	manipulated	v	spectral	0.985594254558142
bhk23_vowel.txt	44	B2	manipulated	v	spectral	1.01336723653622
bhk23_vowel.txt	45	B2	manipulated	v	spectral	1.03130475272726
bhk23_vowel.txt	46	B2	manipulated	v	spectral	0.954080821319409
bhk23_vowel.txt	47	B2	manipulated	v	spectral	0.782564602610121
bhk23_vowel.txt	48	B2	manipulated	v	spectral	0.873452287383455
bhk23_vowel.txt	49	B2	manipulated	v	spectral	1.01570319702011
bhk23_vowel.txt	50	B2	manipulated	v	spectral	0.928819905575289
bhk23_vowel.txt	51	B2	manipulated	v	spectral	0.870807825993481
bhk23_vowel.txt	52	B2	manipulated	v	spectral	0.884357475850862
bhk23_vowel.txt	53	B2	manipulated	v	spectral	0.84881599048064
bhk23_vowel.txt	54	B2	manipulated	v	spectral	0.913033281139093
bhk23_vowel.txt	55	B2	manipulated	v	spectral	0.802627076813784
bhk23_vowel.txt	56	B2	manipulated	v	spectral	0.854973922795714
bhk23_vowel.txt	57	B2	manipulated	v	spectral	0.989225715951896
bhk23_vowel.txt	58	B2	manipulated	v	spectral	0.783960331510682
bhk23_vowel.txt	59	B2	manipulated	v	spectral	0.920269977715755
bhk23_vowel.txt	60	B2	manipulated	v	spectral	0.845909705487807
cck14_vowel.txt	31	B2	0control	v	spectral	0.961415030248544
cck14_vowel.txt	32	B2	0control	v	spectral	1.00514667053368
cck14_vowel.txt	33	B2	0control	v	spectral	0.948726026701266
cck14_vowel.txt	34	B2	0control	v	spectral	1.00613039614109
cck14_vowel.txt	35	B2	0control	v	spectral	0.970667979714825
cck14_vowel.txt	36	B2	0control	v	spectral	1.0057351184883
cck14_vowel.txt	37	B2	0control	v	spectral	1.01557657913034
cck14_vowel.txt	38	B2	0control	v	spectral	0.96424942517813
cck14_vowel.txt	39	B2	0control	v	spectral	0.943536468667125
cck14_vowel.txt	40	B2	0control	v	spectral	1.01044074961717
cck14_vowel.txt	41	B2	0control	v	spectral	1.01894951468168
cck14_vowel.txt	42	B2	0control	v	spectral	1.02417333306773
cck14_vowel.txt	43	B2	0control	v	spectral	1.04621868638306
cck14_vowel.txt	44	B2	0control	v	spectral	1.02951109824073
cck14_vowel.txt	45	B2	0control	v	spectral	0.996147603498195
cck14_vowel.txt	46	B2	0control	v	spectral	1.04159427583442
cck14_vowel.txt	47	B2	0control	v	spectral	0.957694003760801
cck14_vowel.txt	48	B2	0control	v	spectral	0.986178111579221
cck14_vowel.txt	49	B2	0control	v	spectral	0.992073161368192
cck14_vowel.txt	50	B2	0control	v	spectral	1.00093896356484
cck14_vowel.txt	51	B2	0control	v	spectral	1.01141705088709
cck14_vowel.txt	52	B2	0control	v	spectral	1.05280167767359
cck14_vowel.txt	53	B2	0control	v	spectral	NA
cck14_vowel.txt	54	B2	0control	v	spectral	1.00044148401543
cck14_vowel.txt	55	B2	0control	v	spectral	0.982313496059323
cck14_vowel.txt	56	B2	0control	v	spectral	0.921925050762182
cck14_vowel.txt	57	B2	0control	v	spectral	0.970253074779535
cck14_vowel.txt	58	B2	0control	v	spectral	1.01426842655084
cck14_vowel.txt	59	B2	0control	v	spectral	1.00078791724632
cck14_vowel.txt	60	B2	0control	v	spectral	1.02427577882105
cck14_vowel.txt	31	B2	manipulated	v	spectral	0.947038262542406
cck14_vowel.txt	32	B2	manipulated	v	spectral	1.0123006748197
cck14_vowel.txt	33	B2	manipulated	v	spectral	0.954028337378069
cck14_vowel.txt	34	B2	manipulated	v	spectral	1.0093623287605
cck14_vowel.txt	35	B2	manipulated	v	spectral	0.99081844136093
cck14_vowel.txt	36	B2	manipulated	v	spectral	0.967542659724113
cck14_vowel.txt	37	B2	manipulated	v	spectral	0.975469645779804
cck14_vowel.txt	38	B2	manipulated	v	spectral	0.989595468778056
cck14_vowel.txt	39	B2	manipulated	v	spectral	0.961347253267984
cck14_vowel.txt	40	B2	manipulated	v	spectral	1.01571932235976
cck14_vowel.txt	41	B2	manipulated	v	spectral	0.999911291866752
cck14_vowel.txt	42	B2	manipulated	v	spectral	0.983076310128587
cck14_vowel.txt	43	B2	manipulated	v	spectral	0.965330920876963
cck14_vowel.txt	44	B2	manipulated	v	spectral	0.935921199352481
cck14_vowel.txt	45	B2	manipulated	v	spectral	0.956664953716675
cck14_vowel.txt	46	B2	manipulated	v	spectral	0.983920709055255
cck14_vowel.txt	47	B2	manipulated	v	spectral	0.934805674862906
cck14_vowel.txt	48	B2	manipulated	v	spectral	0.946942025918734
cck14_vowel.txt	49	B2	manipulated	v	spectral	0.958465530279634
cck14_vowel.txt	50	B2	manipulated	v	spectral	0.953919496008602
cck14_vowel.txt	51	B2	manipulated	v	spectral	0.955325977503802
cck14_vowel.txt	52	B2	manipulated	v	spectral	0.901077926560876
cck14_vowel.txt	53	B2	manipulated	v	spectral	0.932334330171729
cck14_vowel.txt	54	B2	manipulated	v	spectral	0.896732821106475
cck14_vowel.txt	55	B2	manipulated	v	spectral	0.897127457362533
cck14_vowel.txt	56	B2	manipulated	v	spectral	0.962909042337768
cck14_vowel.txt	57	B2	manipulated	v	spectral	0.99771889777871
cck14_vowel.txt	58	B2	manipulated	v	spectral	0.967679100901266
cck14_vowel.txt	59	B2	manipulated	v	spectral	NA
cck14_vowel.txt	60	B2	manipulated	v	spectral	0.984192512614168
cza06_vowel.txt	31	B2	0control	v	spectral	NA
cza06_vowel.txt	32	B2	0control	v	spectral	1.06442987826025
cza06_vowel.txt	34	B2	0control	v	spectral	1.09669108253444
cza06_vowel.txt	35	B2	0control	v	spectral	1.08990593988709
cza06_vowel.txt	36	B2	0control	v	spectral	1.04322879714741
cza06_vowel.txt	37	B2	0control	v	spectral	1.01526943994787
cza06_vowel.txt	38	B2	0control	v	spectral	1.12327522746296
cza06_vowel.txt	39	B2	0control	v	spectral	1.09730931614701
cza06_vowel.txt	40	B2	0control	v	spectral	1.06691467759443
cza06_vowel.txt	41	B2	0control	v	spectral	1.09203449265411
cza06_vowel.txt	42	B2	0control	v	spectral	1.04860205197238
cza06_vowel.txt	43	B2	0control	v	spectral	1.08745180703172
cza06_vowel.txt	44	B2	0control	v	spectral	1.08539207749469
cza06_vowel.txt	45	B2	0control	v	spectral	1.10919516303929
cza06_vowel.txt	46	B2	0control	v	spectral	1.06658588040965
cza06_vowel.txt	47	B2	0control	v	spectral	1.0586450869406
cza06_vowel.txt	48	B2	0control	v	spectral	1.0735560791207
cza06_vowel.txt	49	B2	0control	v	spectral	1.06192152588282
cza06_vowel.txt	50	B2	0control	v	spectral	1.11420470670366
cza06_vowel.txt	51	B2	0control	v	spectral	1.08697175507057
cza06_vowel.txt	52	B2	0control	v	spectral	1.16817827063894
cza06_vowel.txt	53	B2	0control	v	spectral	1.08700942762692
cza06_vowel.txt	54	B2	0control	v	spectral	1.09462680012635
cza06_vowel.txt	55	B2	0control	v	spectral	1.14819484081004
cza06_vowel.txt	56	B2	0control	v	spectral	1.17234852261098
cza06_vowel.txt	57	B2	0control	v	spectral	1.08045464681225
cza06_vowel.txt	58	B2	0control	v	spectral	1.18021994011965
cza06_vowel.txt	59	B2	0control	v	spectral	1.15725402899857
cza06_vowel.txt	60	B2	0control	v	spectral	1.18595415849775
cza06_vowel.txt	31	B2	manipulated	v	spectral	1.11574371408548
cza06_vowel.txt	32	B2	manipulated	v	spectral	1.10004199783055
cza06_vowel.txt	33	B2	manipulated	v	spectral	1.11778971131538
cza06_vowel.txt	34	B2	manipulated	v	spectral	NA
cza06_vowel.txt	35	B2	manipulated	v	spectral	1.09450522080127
cza06_vowel.txt	36	B2	manipulated	v	spectral	1.09905304500046
cza06_vowel.txt	37	B2	manipulated	v	spectral	1.14328193068553
cza06_vowel.txt	38	B2	manipulated	v	spectral	1.1207879471403
cza06_vowel.txt	39	B2	manipulated	v	spectral	1.12904325413443
cza06_vowel.txt	40	B2	manipulated	v	spectral	1.15204369637109
cza06_vowel.txt	41	B2	manipulated	v	spectral	1.17826251927897
cza06_vowel.txt	42	B2	manipulated	v	spectral	1.05879516559523
cza06_vowel.txt	43	B2	manipulated	v	spectral	1.11058520939599
cza06_vowel.txt	45	B2	manipulated	v	spectral	1.15570327806848
cza06_vowel.txt	46	B2	manipulated	v	spectral	1.13159469962632
cza06_vowel.txt	47	B2	manipulated	v	spectral	1.14403502549833
cza06_vowel.txt	48	B2	manipulated	v	spectral	1.11962221053512
cza06_vowel.txt	49	B2	manipulated	v	spectral	NA
cza06_vowel.txt	50	B2	manipulated	v	spectral	1.15081456628235
cza06_vowel.txt	51	B2	manipulated	v	spectral	1.1247996740325
cza06_vowel.txt	52	B2	manipulated	v	spectral	1.21938611915499
cza06_vowel.txt	53	B2	manipulated	v	spectral	1.17398155749265
cza06_vowel.txt	54	B2	manipulated	v	spectral	1.15464858261201
cza06_vowel.txt	55	B2	manipulated	v	spectral	1.18989848146778
cza06_vowel.txt	56	B2	manipulated	v	spectral	1.14790062953709
cza06_vowel.txt	57	B2	manipulated	v	spectral	1.12217017235414
cza06_vowel.txt	58	B2	manipulated	v	spectral	1.20603478710818
cza06_vowel.txt	59	B2	manipulated	v	spectral	1.16755976000469
cza06_vowel.txt	60	B2	manipulated	v	spectral	1.224208034618
dsa20_vowel.txt	31	B2	0control	v	spectral	0.946853630148181
dsa20_vowel.txt	32	B2	0control	v	spectral	NA
dsa20_vowel.txt	33	B2	0control	v	spectral	0.941130850826378
dsa20_vowel.txt	34	B2	0control	v	spectral	1.00154943698324
dsa20_vowel.txt	35	B2	0control	v	spectral	0.987976715000615
dsa20_vowel.txt	36	B2	0control	v	spectral	0.973344039488389
dsa20_vowel.txt	37	B2	0control	v	spectral	1.01668666448341
dsa20_vowel.txt	38	B2	0control	v	spectral	1.0296505077519
dsa20_vowel.txt	39	B2	0control	v	spectral	1.00994592436908
dsa20_vowel.txt	40	B2	0control	v	spectral	1.03945149558414
dsa20_vowel.txt	41	B2	0control	v	spectral	1.00311050128125
dsa20_vowel.txt	42	B2	0control	v	spectral	0.99636812273121
dsa20_vowel.txt	43	B2	0control	v	spectral	0.979228871725049
dsa20_vowel.txt	44	B2	0control	v	spectral	1.00095114453328
dsa20_vowel.txt	45	B2	0control	v	spectral	1.02909319429031
dsa20_vowel.txt	46	B2	0control	v	spectral	1.01469926881418
dsa20_vowel.txt	47	B2	0control	v	spectral	NA
dsa20_vowel.txt	48	B2	0control	v	spectral	1.00957943439221
dsa20_vowel.txt	49	B2	0control	v	spectral	0.971201419011847
dsa20_vowel.txt	50	B2	0control	v	spectral	0.984921218399992
dsa20_vowel.txt	51	B2	0control	v	spectral	1.02124945393469
dsa20_vowel.txt	52	B2	0control	v	spectral	1.03069903854085
dsa20_vowel.txt	53	B2	0control	v	spectral	1.00676665317928
dsa20_vowel.txt	54	B2	0control	v	spectral	1.02515775509956
dsa20_vowel.txt	55	B2	0control	v	spectral	1.06119278063614
dsa20_vowel.txt	56	B2	0control	v	spectral	0.970550173097264
dsa20_vowel.txt	57	B2	0control	v	spectral	1.01424504431884
dsa20_vowel.txt	58	B2	0control	v	spectral	1.00046776992381
dsa20_vowel.txt	59	B2	0control	v	spectral	0.983910490157847
dsa20_vowel.txt	60	B2	0control	v	spectral	0.971567876117543
dsa20_vowel.txt	31	B2	manipulated	v	spectral	0.932905072913145
dsa20_vowel.txt	32	B2	manipulated	v	spectral	1.0926425226711
dsa20_vowel.txt	33	B2	manipulated	v	spectral	1.06417621351998
dsa20_vowel.txt	34	B2	manipulated	v	spectral	0.999964315826347
dsa20_vowel.txt	35	B2	manipulated	v	spectral	0.982170691716013
dsa20_vowel.txt	36	B2	manipulated	v	spectral	1.08739376686257
dsa20_vowel.txt	37	B2	manipulated	v	spectral	0.967121896886764
dsa20_vowel.txt	38	B2	manipulated	v	spectral	1.04593835509875
dsa20_vowel.txt	39	B2	manipulated	v	spectral	0.938034948708402
dsa20_vowel.txt	40	B2	manipulated	v	spectral	NA
dsa20_vowel.txt	41	B2	manipulated	v	spectral	1.01625322511472
dsa20_vowel.txt	42	B2	manipulated	v	spectral	1.06609088678506
dsa20_vowel.txt	43	B2	manipulated	v	spectral	1.00060742904958
dsa20_vowel.txt	44	B2	manipulated	v	spectral	0.977450632491277
dsa20_vowel.txt	45	B2	manipulated	v	spectral	0.943274023193318
dsa20_vowel.txt	46	B2	manipulated	v	spectral	0.986175139223323
dsa20_vowel.txt	47	B2	manipulated	v	spectral	0.9743913700068
dsa20_vowel.txt	48	B2	manipulated	v	spectral	0.972126263712408
dsa20_vowel.txt	49	B2	manipulated	v	spectral	0.950255779124308
dsa20_vowel.txt	50	B2	manipulated	v	spectral	0.995791317167148
dsa20_vowel.txt	51	B2	manipulated	v	spectral	0.954835289268068
dsa20_vowel.txt	52	B2	manipulated	v	spectral	0.990322963819784
dsa20_vowel.txt	53	B2	manipulated	v	spectral	0.976308401033537
dsa20_vowel.txt	54	B2	manipulated	v	spectral	0.967860644665553
dsa20_vowel.txt	55	B2	manipulated	v	spectral	1.00471828880497
dsa20_vowel.txt	56	B2	manipulated	v	spectral	0.989001093890411
dsa20_vowel.txt	57	B2	manipulated	v	spectral	0.991374067256003
dsa20_vowel.txt	58	B2	manipulated	v	spectral	1.00980035077886
dsa20_vowel.txt	59	B2	manipulated	v	spectral	0.974785552026904
dsa20_vowel.txt	60	B2	manipulated	v	spectral	0.991942628812954
ere28_vowel.txt	31	B2	0control	v	spectral	0.993302574983412
ere28_vowel.txt	32	B2	0control	v	spectral	0.975656974870895
ere28_vowel.txt	33	B2	0control	v	spectral	0.962894661852389
ere28_vowel.txt	34	B2	0control	v	spectral	0.954459837345959
ere28_vowel.txt	35	B2	0control	v	spectral	0.958735098490068
ere28_vowel.txt	36	B2	0control	v	spectral	0.944794295794158
ere28_vowel.txt	37	B2	0control	v	spectral	0.952340833579282
ere28_vowel.txt	38	B2	0control	v	spectral	0.952267012568622
ere28_vowel.txt	39	B2	0control	v	spectral	0.93836228632114
ere28_vowel.txt	40	B2	0control	v	spectral	0.965039136870074
ere28_vowel.txt	41	B2	0control	v	spectral	0.976606944749491
ere28_vowel.txt	42	B2	0control	v	spectral	0.956519094163197
ere28_vowel.txt	43	B2	0control	v	spectral	0.991173383318566
ere28_vowel.txt	44	B2	0control	v	spectral	0.968699017530489
ere28_vowel.txt	45	B2	0control	v	spectral	0.971668990188749
ere28_vowel.txt	46	B2	0control	v	spectral	0.953296197005904
ere28_vowel.txt	47	B2	0control	v	spectral	1.01311763425346
ere28_vowel.txt	48	B2	0control	v	spectral	0.976597620460759
ere28_vowel.txt	49	B2	0control	v	spectral	0.990931962853329
ere28_vowel.txt	50	B2	0control	v	spectral	0.984568637536324
ere28_vowel.txt	51	B2	0control	v	spectral	1.01721565361736
ere28_vowel.txt	52	B2	0control	v	spectral	0.995738253899594
ere28_vowel.txt	53	B2	0control	v	spectral	1.02115592258457
ere28_vowel.txt	54	B2	0control	v	spectral	0.992419257529337
ere28_vowel.txt	55	B2	0control	v	spectral	1.00849935658551
ere28_vowel.txt	56	B2	0control	v	spectral	0.986941032272087
ere28_vowel.txt	57	B2	0control	v	spectral	1.00693967992116
ere28_vowel.txt	58	B2	0control	v	spectral	1.03029899885131
ere28_vowel.txt	59	B2	0control	v	spectral	0.975992885929531
ere28_vowel.txt	60	B2	0control	v	spectral	NA
ere28_vowel.txt	31	B2	manipulated	v	spectral	0.988413650491661
ere28_vowel.txt	32	B2	manipulated	v	spectral	0.942773716736589
ere28_vowel.txt	33	B2	manipulated	v	spectral	0.983526886299209
ere28_vowel.txt	34	B2	manipulated	v	spectral	0.996498727746438
ere28_vowel.txt	35	B2	manipulated	v	spectral	0.964010450561517
ere28_vowel.txt	36	B2	manipulated	v	spectral	0.999406949472131
ere28_vowel.txt	37	B2	manipulated	v	spectral	0.984863443914748
ere28_vowel.txt	38	B2	manipulated	v	spectral	0.957911930803733
ere28_vowel.txt	39	B2	manipulated	v	spectral	0.974308822933048
ere28_vowel.txt	40	B2	manipulated	v	spectral	0.967288871992612
ere28_vowel.txt	41	B2	manipulated	v	spectral	1.00107340636845
ere28_vowel.txt	42	B2	manipulated	v	spectral	NA
ere28_vowel.txt	43	B2	manipulated	v	spectral	0.989050761065851
ere28_vowel.txt	44	B2	manipulated	v	spectral	0.984891744761795
ere28_vowel.txt	45	B2	manipulated	v	spectral	0.972373358241647
ere28_vowel.txt	46	B2	manipulated	v	spectral	0.970856582759284
ere28_vowel.txt	47	B2	manipulated	v	spectral	0.963043245601974
ere28_vowel.txt	48	B2	manipulated	v	spectral	NA
ere28_vowel.txt	49	B2	manipulated	v	spectral	0.983703401995264
ere28_vowel.txt	50	B2	manipulated	v	spectral	0.980051189853232
ere28_vowel.txt	51	B2	manipulated	v	spectral	1.00562420534018
ere28_vowel.txt	52	B2	manipulated	v	spectral	0.988449465705957
ere28_vowel.txt	53	B2	manipulated	v	spectral	1.01204279402749
ere28_vowel.txt	54	B2	manipulated	v	spectral	1.02096654111662
ere28_vowel.txt	55	B2	manipulated	v	spectral	1.04065430513177
ere28_vowel.txt	56	B2	manipulated	v	spectral	0.970028321682346
ere28_vowel.txt	57	B2	manipulated	v	spectral	0.994685468220069
ere28_vowel.txt	58	B2	manipulated	v	spectral	1.00732003981655
ere28_vowel.txt	59	B2	manipulated	v	spectral	1.02177057279494
ere28_vowel.txt	60	B2	manipulated	v	spectral	1.01064988836361
gsn06_vowel.txt	31	B2	0control	v	spectral	0.996601898072343
gsn06_vowel.txt	32	B2	0control	v	spectral	0.996083704434847
gsn06_vowel.txt	33	B2	0control	v	spectral	1.08652949372211
gsn06_vowel.txt	34	B2	0control	v	spectral	1.04718912630115
gsn06_vowel.txt	35	B2	0control	v	spectral	0.983738519435676
gsn06_vowel.txt	36	B2	0control	v	spectral	NA
gsn06_vowel.txt	37	B2	0control	v	spectral	0.959827051923284
gsn06_vowel.txt	38	B2	0control	v	spectral	0.990722631267354
gsn06_vowel.txt	39	B2	0control	v	spectral	1.05091481644255
gsn06_vowel.txt	40	B2	0control	v	spectral	1.02584321978996
gsn06_vowel.txt	41	B2	0control	v	spectral	1.04029776792003
gsn06_vowel.txt	42	B2	0control	v	spectral	1.05281355351727
gsn06_vowel.txt	43	B2	0control	v	spectral	1.10617814684633
gsn06_vowel.txt	44	B2	0control	v	spectral	1.12067772522539
gsn06_vowel.txt	45	B2	0control	v	spectral	1.04173584402232
gsn06_vowel.txt	46	B2	0control	v	spectral	NA
gsn06_vowel.txt	47	B2	0control	v	spectral	1.05567728645702
gsn06_vowel.txt	48	B2	0control	v	spectral	1.07621660562989
gsn06_vowel.txt	49	B2	0control	v	spectral	1.09779316617222
gsn06_vowel.txt	50	B2	0control	v	spectral	1.08034549718123
gsn06_vowel.txt	51	B2	0control	v	spectral	1.10528878354841
gsn06_vowel.txt	52	B2	0control	v	spectral	1.06042118236427
gsn06_vowel.txt	53	B2	0control	v	spectral	1.08087961684012
gsn06_vowel.txt	54	B2	0control	v	spectral	1.03750532107563
gsn06_vowel.txt	55	B2	0control	v	spectral	1.04190575661908
gsn06_vowel.txt	56	B2	0control	v	spectral	1.09215732775126
gsn06_vowel.txt	57	B2	0control	v	spectral	1.04424666857507
gsn06_vowel.txt	58	B2	0control	v	spectral	1.05406263650386
gsn06_vowel.txt	59	B2	0control	v	spectral	1.08202151859868
gsn06_vowel.txt	60	B2	0control	v	spectral	1.07032650799937
gsn06_vowel.txt	31	B2	manipulated	v	spectral	1.02109388238203
gsn06_vowel.txt	32	B2	manipulated	v	spectral	0.994064034670925
gsn06_vowel.txt	33	B2	manipulated	v	spectral	NA
gsn06_vowel.txt	34	B2	manipulated	v	spectral	1.07866695033053
gsn06_vowel.txt	35	B2	manipulated	v	spectral	1.02348677766331
gsn06_vowel.txt	36	B2	manipulated	v	spectral	1.01000564204533
gsn06_vowel.txt	37	B2	manipulated	v	spectral	1.0769620192574
gsn06_vowel.txt	38	B2	manipulated	v	spectral	1.08210074502547
gsn06_vowel.txt	39	B2	manipulated	v	spectral	1.09942672144951
gsn06_vowel.txt	40	B2	manipulated	v	spectral	1.0281722351121
gsn06_vowel.txt	41	B2	manipulated	v	spectral	1.1322508360278
gsn06_vowel.txt	42	B2	manipulated	v	spectral	1.08160820218576
gsn06_vowel.txt	43	B2	manipulated	v	spectral	NA
gsn06_vowel.txt	44	B2	manipulated	v	spectral	1.10119149863298
gsn06_vowel.txt	45	B2	manipulated	v	spectral	1.10603693844093
gsn06_vowel.txt	46	B2	manipulated	v	spectral	1.04294039172674
gsn06_vowel.txt	47	B2	manipulated	v	spectral	1.10064533773929
gsn06_vowel.txt	48	B2	manipulated	v	spectral	1.18354126163393
gsn06_vowel.txt	49	B2	manipulated	v	spectral	1.10757540094729
gsn06_vowel.txt	50	B2	manipulated	v	spectral	1.09556322433626
gsn06_vowel.txt	51	B2	manipulated	v	spectral	1.00831594543055
gsn06_vowel.txt	52	B2	manipulated	v	spectral	1.12949693227569
gsn06_vowel.txt	53	B2	manipulated	v	spectral	1.07683598159601
gsn06_vowel.txt	54	B2	manipulated	v	spectral	1.03102973823289
gsn06_vowel.txt	55	B2	manipulated	v	spectral	1.04983329098562
gsn06_vowel.txt	56	B2	manipulated	v	spectral	1.0988378203094
gsn06_vowel.txt	57	B2	manipulated	v	spectral	1.03171686863629
gsn06_vowel.txt	58	B2	manipulated	v	spectral	1.09983306663623
gsn06_vowel.txt	59	B2	manipulated	v	spectral	1.13841819031743
gsn06_vowel.txt	60	B2	manipulated	v	spectral	1.10797109462177
jhr19_vowel.txt	31	B2	0control	v	spectral	0.992675456843084
jhr19_vowel.txt	32	B2	0control	v	spectral	0.9934488205572
jhr19_vowel.txt	33	B2	0control	v	spectral	0.953677533879167
jhr19_vowel.txt	34	B2	0control	v	spectral	0.986066759348892
jhr19_vowel.txt	35	B2	0control	v	spectral	1.00833215246397
jhr19_vowel.txt	36	B2	0control	v	spectral	1.01590784899524
jhr19_vowel.txt	37	B2	0control	v	spectral	0.929240909900546
jhr19_vowel.txt	38	B2	0control	v	spectral	0.936957013647803
jhr19_vowel.txt	39	B2	0control	v	spectral	0.917859876890848
jhr19_vowel.txt	40	B2	0control	v	spectral	0.976274171016921
jhr19_vowel.txt	41	B2	0control	v	spectral	0.957773406430416
jhr19_vowel.txt	42	B2	0control	v	spectral	0.975667584800099
jhr19_vowel.txt	43	B2	0control	v	spectral	0.992810663323561
jhr19_vowel.txt	44	B2	0control	v	spectral	0.987103336139073
jhr19_vowel.txt	45	B2	0control	v	spectral	0.968527460063029
jhr19_vowel.txt	46	B2	0control	v	spectral	0.95740099600674
jhr19_vowel.txt	47	B2	0control	v	spectral	0.965560055819983
jhr19_vowel.txt	48	B2	0control	v	spectral	1.01507782252524
jhr19_vowel.txt	49	B2	0control	v	spectral	0.969454534205094
jhr19_vowel.txt	50	B2	0control	v	spectral	1.02300663097078
jhr19_vowel.txt	51	B2	0control	v	spectral	0.982608746923753
jhr19_vowel.txt	52	B2	0control	v	spectral	1.03130936535496
jhr19_vowel.txt	53	B2	0control	v	spectral	1.07102092946459
jhr19_vowel.txt	54	B2	0control	v	spectral	NA
jhr19_vowel.txt	55	B2	0control	v	spectral	1.03655435867393
jhr19_vowel.txt	56	B2	0control	v	spectral	1.04407958834181
jhr19_vowel.txt	57	B2	0control	v	spectral	0.9770983453093
jhr19_vowel.txt	58	B2	0control	v	spectral	1.0430555822998
jhr19_vowel.txt	59	B2	0control	v	spectral	1.04015878459601
jhr19_vowel.txt	60	B2	0control	v	spectral	1.04184364739188
jhr19_vowel.txt	31	B2	manipulated	v	spectral	0.963717771758059
jhr19_vowel.txt	32	B2	manipulated	v	spectral	0.974006800836054
jhr19_vowel.txt	33	B2	manipulated	v	spectral	1.02566301743216
jhr19_vowel.txt	34	B2	manipulated	v	spectral	0.972425453311512
jhr19_vowel.txt	35	B2	manipulated	v	spectral	0.936003940433485
jhr19_vowel.txt	36	B2	manipulated	v	spectral	0.953408400817123
jhr19_vowel.txt	37	B2	manipulated	v	spectral	0.989717360242913
jhr19_vowel.txt	38	B2	manipulated	v	spectral	0.95279531041189
jhr19_vowel.txt	39	B2	manipulated	v	spectral	0.981321757372143
jhr19_vowel.txt	40	B2	manipulated	v	spectral	0.975484677109868
jhr19_vowel.txt	41	B2	manipulated	v	spectral	0.956773971252354
jhr19_vowel.txt	42	B2	manipulated	v	spectral	1.01905967195606
jhr19_vowel.txt	43	B2	manipulated	v	spectral	1.00803927680161
jhr19_vowel.txt	44	B2	manipulated	v	spectral	0.98976160911907
jhr19_vowel.txt	45	B2	manipulated	v	spectral	0.979934112216877
jhr19_vowel.txt	46	B2	manipulated	v	spectral	0.981215928362407
jhr19_vowel.txt	47	B2	manipulated	v	spectral	1.03220055073687
jhr19_vowel.txt	48	B2	manipulated	v	spectral	0.963261849280762
jhr19_vowel.txt	49	B2	manipulated	v	spectral	1.05555585237981
jhr19_vowel.txt	50	B2	manipulated	v	spectral	NA
jhr19_vowel.txt	51	B2	manipulated	v	spectral	1.02418712494906
jhr19_vowel.txt	52	B2	manipulated	v	spectral	1.04837099002232
jhr19_vowel.txt	53	B2	manipulated	v	spectral	1.0653892303158
jhr19_vowel.txt	54	B2	manipulated	v	spectral	1.06202157871932
jhr19_vowel.txt	55	B2	manipulated	v	spectral	1.0119096670247
jhr19_vowel.txt	56	B2	manipulated	v	spectral	1.06594205579027
jhr19_vowel.txt	57	B2	manipulated	v	spectral	1.03767864381805
jhr19_vowel.txt	58	B2	manipulated	v	spectral	1.06376013424205
jhr19_vowel.txt	59	B2	manipulated	v	spectral	1.03165849500064
jhr19_vowel.txt	60	B2	manipulated	v	spectral	1.06912555843612
jka21_vowel.txt	31	B2	0control	v	spectral	1.06831770826167
jka21_vowel.txt	32	B2	0control	v	spectral	1.05786593374604
jka21_vowel.txt	33	B2	0control	v	spectral	1.03981933121818
jka21_vowel.txt	34	B2	0control	v	spectral	1.11455283049711
jka21_vowel.txt	35	B2	0control	v	spectral	1.00415944758944
jka21_vowel.txt	36	B2	0control	v	spectral	1.00350735133666
jka21_vowel.txt	37	B2	0control	v	spectral	0.977535202937814
jka21_vowel.txt	38	B2	0control	v	spectral	1.14889209389513
jka21_vowel.txt	39	B2	0control	v	spectral	1.1534049128788
jka21_vowel.txt	40	B2	0control	v	spectral	1.03905001885739
jka21_vowel.txt	41	B2	0control	v	spectral	1.04921868305343
jka21_vowel.txt	42	B2	0control	v	spectral	1.0725399814601
jka21_vowel.txt	43	B2	0control	v	spectral	1.14081053246739
jka21_vowel.txt	44	B2	0control	v	spectral	1.12183706229109
jka21_vowel.txt	45	B2	0control	v	spectral	1.13954319880157
jka21_vowel.txt	46	B2	0control	v	spectral	1.07369189091344
jka21_vowel.txt	47	B2	0control	v	spectral	1.01806480652873
jka21_vowel.txt	48	B2	0control	v	spectral	1.01599534514481
jka21_vowel.txt	49	B2	0control	v	spectral	1.00286021738612
jka21_vowel.txt	50	B2	0control	v	spectral	1.1602624671195
jka21_vowel.txt	51	B2	0control	v	spectral	1.16099510806646
jka21_vowel.txt	52	B2	0control	v	spectral	1.02205929372463
jka21_vowel.txt	53	B2	0control	v	spectral	1.03776706124108
jka21_vowel.txt	54	B2	0control	v	spectral	1.05644560330822
jka21_vowel.txt	55	B2	0control	v	spectral	1.08038240699597
jka21_vowel.txt	56	B2	0control	v	spectral	1.02766001436354
jka21_vowel.txt	57	B2	0control	v	spectral	1.01036331656927
jka21_vowel.txt	58	B2	0control	v	spectral	1.11720863169138
jka21_vowel.txt	59	B2	0control	v	spectral	1.18107830805313
jka21_vowel.txt	60	B2	0control	v	spectral	1.13209792967503
jka21_vowel.txt	31	B2	manipulated	v	spectral	1.06944843970323
jka21_vowel.txt	32	B2	manipulated	v	spectral	NA
jka21_vowel.txt	33	B2	manipulated	v	spectral	1.05648520194924
jka21_vowel.txt	34	B2	manipulated	v	spectral	1.13587866834723
jka21_vowel.txt	35	B2	manipulated	v	spectral	1.01745973348868
jka21_vowel.txt	36	B2	manipulated	v	spectral	1.01565811423453
jka21_vowel.txt	37	B2	manipulated	v	spectral	1.03047823421079
jka21_vowel.txt	38	B2	manipulated	v	spectral	1.14187562702415
jka21_vowel.txt	39	B2	manipulated	v	spectral	1.07614766671827
jka21_vowel.txt	40	B2	manipulated	v	spectral	1.10850677502941
jka21_vowel.txt	41	B2	manipulated	v	spectral	1.02416204497309
jka21_vowel.txt	42	B2	manipulated	v	spectral	1.05363911522685
jka21_vowel.txt	43	B2	manipulated	v	spectral	1.14276547889386
jka21_vowel.txt	44	B2	manipulated	v	spectral	1.14105176525852
jka21_vowel.txt	45	B2	manipulated	v	spectral	1.1347094679948
jka21_vowel.txt	46	B2	manipulated	v	spectral	1.03417214096
jka21_vowel.txt	47	B2	manipulated	v	spectral	1.12702668985123
jka21_vowel.txt	48	B2	manipulated	v	spectral	1.11799038585258
jka21_vowel.txt	49	B2	manipulated	v	spectral	1.17066102435052
jka21_vowel.txt	50	B2	manipulated	v	spectral	1.12820902692273
jka21_vowel.txt	51	B2	manipulated	v	spectral	1.10944208287224
jka21_vowel.txt	52	B2	manipulated	v	spectral	1.07919544736728
jka21_vowel.txt	53	B2	manipulated	v	spectral	1.10129626363916
jka21_vowel.txt	54	B2	manipulated	v	spectral	1.04070968852992
jka21_vowel.txt	55	B2	manipulated	v	spectral	1.07914819082687
jka21_vowel.txt	56	B2	manipulated	v	spectral	1.05855091183556
jka21_vowel.txt	57	B2	manipulated	v	spectral	1.15969762996172
jka21_vowel.txt	58	B2	manipulated	v	spectral	1.17524396070597
jka21_vowel.txt	59	B2	manipulated	v	spectral	1.17257026261267
jka21_vowel.txt	60	B2	manipulated	v	spectral	1.0977886759358
kba16_vowel.txt	31	B2	0control	v	spectral	0.89154368844541
kba16_vowel.txt	32	B2	0control	v	spectral	0.924283188792976
kba16_vowel.txt	33	B2	0control	v	spectral	0.925082732994273
kba16_vowel.txt	34	B2	0control	v	spectral	0.931388903862329
kba16_vowel.txt	35	B2	0control	v	spectral	0.952751604882282
kba16_vowel.txt	36	B2	0control	v	spectral	0.920196016364877
kba16_vowel.txt	37	B2	0control	v	spectral	0.917383349976172
kba16_vowel.txt	38	B2	0control	v	spectral	0.972188454293722
kba16_vowel.txt	39	B2	0control	v	spectral	0.928221734235671
kba16_vowel.txt	40	B2	0control	v	spectral	0.916290338744431
kba16_vowel.txt	41	B2	0control	v	spectral	0.913896177008862
kba16_vowel.txt	42	B2	0control	v	spectral	0.945526524318685
kba16_vowel.txt	43	B2	0control	v	spectral	0.935701197270517
kba16_vowel.txt	44	B2	0control	v	spectral	0.974509883351472
kba16_vowel.txt	45	B2	0control	v	spectral	0.901315158000491
kba16_vowel.txt	46	B2	0control	v	spectral	0.938805998697484
kba16_vowel.txt	47	B2	0control	v	spectral	0.949296103850417
kba16_vowel.txt	48	B2	0control	v	spectral	0.937881008316564
kba16_vowel.txt	49	B2	0control	v	spectral	0.923903516294145
kba16_vowel.txt	50	B2	0control	v	spectral	0.90741623150675
kba16_vowel.txt	51	B2	0control	v	spectral	0.976139610686404
kba16_vowel.txt	52	B2	0control	v	spectral	0.977229752582845
kba16_vowel.txt	53	B2	0control	v	spectral	NA
kba16_vowel.txt	54	B2	0control	v	spectral	0.955214163777124
kba16_vowel.txt	55	B2	0control	v	spectral	0.972943936697224
kba16_vowel.txt	56	B2	0control	v	spectral	0.969808192700948
kba16_vowel.txt	57	B2	0control	v	spectral	0.948672676872589
kba16_vowel.txt	58	B2	0control	v	spectral	0.981026833572614
kba16_vowel.txt	59	B2	0control	v	spectral	0.983886056864086
kba16_vowel.txt	60	B2	0control	v	spectral	NA
kba16_vowel.txt	31	B2	manipulated	v	spectral	0.870673438589143
kba16_vowel.txt	32	B2	manipulated	v	spectral	0.86387610069682
kba16_vowel.txt	33	B2	manipulated	v	spectral	0.96976715638701
kba16_vowel.txt	34	B2	manipulated	v	spectral	0.969199793886554
kba16_vowel.txt	35	B2	manipulated	v	spectral	0.914477494387871
kba16_vowel.txt	36	B2	manipulated	v	spectral	0.88010939293191
kba16_vowel.txt	37	B2	manipulated	v	spectral	0.888996687963764
kba16_vowel.txt	38	B2	manipulated	v	spectral	0.92735143512335
kba16_vowel.txt	39	B2	manipulated	v	spectral	0.917827908095739
kba16_vowel.txt	40	B2	manipulated	v	spectral	0.977093390061781
kba16_vowel.txt	41	B2	manipulated	v	spectral	0.95461535803904
kba16_vowel.txt	42	B2	manipulated	v	spectral	0.925365910099071
kba16_vowel.txt	43	B2	manipulated	v	spectral	0.919307418970617
kba16_vowel.txt	44	B2	manipulated	v	spectral	0.906205412523538
kba16_vowel.txt	45	B2	manipulated	v	spectral	0.900208845521692
kba16_vowel.txt	46	B2	manipulated	v	spectral	0.906529983789893
kba16_vowel.txt	47	B2	manipulated	v	spectral	0.930277541872929
kba16_vowel.txt	48	B2	manipulated	v	spectral	0.91080151172
kba16_vowel.txt	49	B2	manipulated	v	spectral	0.919990275860985
kba16_vowel.txt	50	B2	manipulated	v	spectral	0.903058786857397
kba16_vowel.txt	51	B2	manipulated	v	spectral	0.940807537867429
kba16_vowel.txt	52	B2	manipulated	v	spectral	0.964746872697066
kba16_vowel.txt	53	B2	manipulated	v	spectral	0.92584515585253
kba16_vowel.txt	54	B2	manipulated	v	spectral	0.984297000085738
kba16_vowel.txt	55	B2	manipulated	v	spectral	0.953166751516144
kba16_vowel.txt	56	B2	manipulated	v	spectral	0.939868573728426
kba16_vowel.txt	57	B2	manipulated	v	spectral	1.00433130918572
kba16_vowel.txt	58	B2	manipulated	v	spectral	1.00727061911204
kba16_vowel.txt	59	B2	manipulated	v	spectral	NA
kba16_vowel.txt	60	B2	manipulated	v	spectral	0.952003666558696
khe30_vowel.txt	31	B2	0control	v	spectral	1.10325815243358
khe30_vowel.txt	32	B2	0control	v	spectral	1.04274063164024
khe30_vowel.txt	33	B2	0control	v	spectral	1.18407442267072
khe30_vowel.txt	34	B2	0control	v	spectral	1.13843233836133
khe30_vowel.txt	35	B2	0control	v	spectral	1.07161553552839
khe30_vowel.txt	36	B2	0control	v	spectral	0.965268289739272
khe30_vowel.txt	37	B2	0control	v	spectral	1.09452288996533
khe30_vowel.txt	38	B2	0control	v	spectral	1.12192495935827
khe30_vowel.txt	39	B2	0control	v	spectral	1.09964736616778
khe30_vowel.txt	40	B2	0control	v	spectral	1.07269858267123
khe30_vowel.txt	41	B2	0control	v	spectral	1.08392178646846
khe30_vowel.txt	42	B2	0control	v	spectral	0.964193494142493
khe30_vowel.txt	43	B2	0control	v	spectral	1.16570755523365
khe30_vowel.txt	44	B2	0control	v	spectral	1.09092688044613
khe30_vowel.txt	45	B2	0control	v	spectral	NA
khe30_vowel.txt	46	B2	0control	v	spectral	1.11149414088252
khe30_vowel.txt	47	B2	0control	v	spectral	1.11943023754676
khe30_vowel.txt	48	B2	0control	v	spectral	1.00050734856963
khe30_vowel.txt	49	B2	0control	v	spectral	1.025433546224
khe30_vowel.txt	50	B2	0control	v	spectral	0.995286939780813
khe30_vowel.txt	52	B2	0control	v	spectral	0.987869074411804
khe30_vowel.txt	53	B2	0control	v	spectral	1.03299989185019
khe30_vowel.txt	54	B2	0control	v	spectral	1.031721071199
khe30_vowel.txt	55	B2	0control	v	spectral	1.05140526736178
khe30_vowel.txt	56	B2	0control	v	spectral	0.987764327033218
khe30_vowel.txt	57	B2	0control	v	spectral	1.05942935165343
khe30_vowel.txt	58	B2	0control	v	spectral	1.01748892442913
khe30_vowel.txt	59	B2	0control	v	spectral	1.06039661427439
khe30_vowel.txt	60	B2	0control	v	spectral	1.0176428492084
khe30_vowel.txt	31	B2	manipulated	v	spectral	1.06017381648317
khe30_vowel.txt	32	B2	manipulated	v	spectral	1.08039272035797
khe30_vowel.txt	33	B2	manipulated	v	spectral	1.03975528563249
khe30_vowel.txt	34	B2	manipulated	v	spectral	0.937896116758365
khe30_vowel.txt	35	B2	manipulated	v	spectral	0.932606871119926
khe30_vowel.txt	36	B2	manipulated	v	spectral	0.971783644719403
khe30_vowel.txt	37	B2	manipulated	v	spectral	1.09328389266835
khe30_vowel.txt	38	B2	manipulated	v	spectral	1.01522174789315
khe30_vowel.txt	39	B2	manipulated	v	spectral	1.00685535182204
khe30_vowel.txt	40	B2	manipulated	v	spectral	0.985903761185138
khe30_vowel.txt	41	B2	manipulated	v	spectral	1.01217259328183
khe30_vowel.txt	42	B2	manipulated	v	spectral	0.991991177798121
khe30_vowel.txt	43	B2	manipulated	v	spectral	0.969162388491019
khe30_vowel.txt	44	B2	manipulated	v	spectral	0.964028847539906
khe30_vowel.txt	45	B2	manipulated	v	spectral	1.03916980207928
khe30_vowel.txt	46	B2	manipulated	v	spectral	1.00397751567103
khe30_vowel.txt	47	B2	manipulated	v	spectral	NA
khe30_vowel.txt	48	B2	manipulated	v	spectral	1.041890224917
khe30_vowel.txt	49	B2	manipulated	v	spectral	0.959884524460674
khe30_vowel.txt	50	B2	manipulated	v	spectral	0.983767196147884
khe30_vowel.txt	51	B2	manipulated	v	spectral	0.971187106867236
khe30_vowel.txt	52	B2	manipulated	v	spectral	1.05389229590908
khe30_vowel.txt	53	B2	manipulated	v	spectral	0.982951418907521
khe30_vowel.txt	54	B2	manipulated	v	spectral	0.990909645506009
khe30_vowel.txt	55	B2	manipulated	v	spectral	1.04646045266971
khe30_vowel.txt	56	B2	manipulated	v	spectral	1.00667014159027
khe30_vowel.txt	57	B2	manipulated	v	spectral	1.08599035633335
khe30_vowel.txt	58	B2	manipulated	v	spectral	0.997624396723102
khe30_vowel.txt	59	B2	manipulated	v	spectral	1.02846078740291
khe30_vowel.txt	60	B2	manipulated	v	spectral	0.998894562276122
kws11_vowel.txt	31	B2	0control	v	spectral	0.999878606745005
kws11_vowel.txt	32	B2	0control	v	spectral	1.0048556751275
kws11_vowel.txt	33	B2	0control	v	spectral	0.988186888706486
kws11_vowel.txt	34	B2	0control	v	spectral	1.01793477881385
kws11_vowel.txt	35	B2	0control	v	spectral	0.999218236845108
kws11_vowel.txt	36	B2	0control	v	spectral	1.01213210288133
kws11_vowel.txt	37	B2	0control	v	spectral	0.998916822239404
kws11_vowel.txt	38	B2	0control	v	spectral	1.00891601845047
kws11_vowel.txt	39	B2	0control	v	spectral	1.0450675345344
kws11_vowel.txt	40	B2	0control	v	spectral	NA
kws11_vowel.txt	41	B2	0control	v	spectral	1.0448707562187
kws11_vowel.txt	42	B2	0control	v	spectral	0.969897448867155
kws11_vowel.txt	43	B2	0control	v	spectral	0.990520102159158
kws11_vowel.txt	44	B2	0control	v	spectral	1.0057396403951
kws11_vowel.txt	45	B2	0control	v	spectral	0.969865153386076
kws11_vowel.txt	46	B2	0control	v	spectral	0.994897912591955
kws11_vowel.txt	47	B2	0control	v	spectral	1.02055094677849
kws11_vowel.txt	48	B2	0control	v	spectral	1.00347204696218
kws11_vowel.txt	49	B2	0control	v	spectral	1.00273520386747
kws11_vowel.txt	50	B2	0control	v	spectral	1.04505660543423
kws11_vowel.txt	51	B2	0control	v	spectral	1.03871623925043
kws11_vowel.txt	52	B2	0control	v	spectral	0.996462418156401
kws11_vowel.txt	53	B2	0control	v	spectral	0.996490446136969
kws11_vowel.txt	54	B2	0control	v	spectral	1.03595683158878
kws11_vowel.txt	55	B2	0control	v	spectral	1.03164927297427
kws11_vowel.txt	56	B2	0control	v	spectral	1.03795376644793
kws11_vowel.txt	57	B2	0control	v	spectral	1.008952742444
kws11_vowel.txt	58	B2	0control	v	spectral	0.968125118450674
kws11_vowel.txt	59	B2	0control	v	spectral	0.988530982634473
kws11_vowel.txt	60	B2	0control	v	spectral	0.973700830950901
kws11_vowel.txt	31	B2	manipulated	v	spectral	1.00191265332643
kws11_vowel.txt	32	B2	manipulated	v	spectral	NA
kws11_vowel.txt	33	B2	manipulated	v	spectral	0.978699890227098
kws11_vowel.txt	34	B2	manipulated	v	spectral	1.01073578773538
kws11_vowel.txt	35	B2	manipulated	v	spectral	0.993217158240781
kws11_vowel.txt	36	B2	manipulated	v	spectral	1.00954463956886
kws11_vowel.txt	37	B2	manipulated	v	spectral	0.998796268257219
kws11_vowel.txt	38	B2	manipulated	v	spectral	1.05698908572418
kws11_vowel.txt	39	B2	manipulated	v	spectral	NA
kws11_vowel.txt	40	B2	manipulated	v	spectral	1.022528089365
kws11_vowel.txt	41	B2	manipulated	v	spectral	1.01567218281672
kws11_vowel.txt	42	B2	manipulated	v	spectral	0.994491563789968
kws11_vowel.txt	43	B2	manipulated	v	spectral	1.00598681662887
kws11_vowel.txt	44	B2	manipulated	v	spectral	1.01621361928099
kws11_vowel.txt	45	B2	manipulated	v	spectral	1.00152963883631
kws11_vowel.txt	46	B2	manipulated	v	spectral	0.990489172147926
kws11_vowel.txt	47	B2	manipulated	v	spectral	0.998469318818713
kws11_vowel.txt	48	B2	manipulated	v	spectral	1.04302341653437
kws11_vowel.txt	49	B2	manipulated	v	spectral	0.979420163088677
kws11_vowel.txt	50	B2	manipulated	v	spectral	1.00490735605489
kws11_vowel.txt	51	B2	manipulated	v	spectral	1.02857050182093
kws11_vowel.txt	52	B2	manipulated	v	spectral	1.03014081815744
kws11_vowel.txt	53	B2	manipulated	v	spectral	1.03010152902968
kws11_vowel.txt	54	B2	manipulated	v	spectral	1.02817276450876
kws11_vowel.txt	55	B2	manipulated	v	spectral	0.970728489205515
kws11_vowel.txt	56	B2	manipulated	v	spectral	1.03261065416458
kws11_vowel.txt	57	B2	manipulated	v	spectral	0.975887728995182
kws11_vowel.txt	58	B2	manipulated	v	spectral	0.982036659203489
kws11_vowel.txt	59	B2	manipulated	v	spectral	1.03003282601579
kws11_vowel.txt	60	B2	manipulated	v	spectral	0.960089646372134
lsa27_vowel.txt	31	B2	0control	v	spectral	0.996253925634043
lsa27_vowel.txt	32	B2	0control	v	spectral	0.99911618814043
lsa27_vowel.txt	33	B2	0control	v	spectral	0.978191185933261
lsa27_vowel.txt	34	B2	0control	v	spectral	1.02668702324416
lsa27_vowel.txt	35	B2	0control	v	spectral	1.00998326238996
lsa27_vowel.txt	36	B2	0control	v	spectral	0.955486911113757
lsa27_vowel.txt	37	B2	0control	v	spectral	0.934319343717141
lsa27_vowel.txt	38	B2	0control	v	spectral	0.940295607319704
lsa27_vowel.txt	39	B2	0control	v	spectral	0.950645204444819
lsa27_vowel.txt	40	B2	0control	v	spectral	0.898046927878333
lsa27_vowel.txt	41	B2	0control	v	spectral	0.939313661950848
lsa27_vowel.txt	42	B2	0control	v	spectral	NA
lsa27_vowel.txt	43	B2	0control	v	spectral	0.982041800245796
lsa27_vowel.txt	44	B2	0control	v	spectral	0.956652839783731
lsa27_vowel.txt	45	B2	0control	v	spectral	0.999513671360467
lsa27_vowel.txt	46	B2	0control	v	spectral	0.957832854588313
lsa27_vowel.txt	47	B2	0control	v	spectral	NA
lsa27_vowel.txt	48	B2	0control	v	spectral	1.00681418951589
lsa27_vowel.txt	49	B2	0control	v	spectral	0.947616141214352
lsa27_vowel.txt	50	B2	0control	v	spectral	0.932072704885343
lsa27_vowel.txt	51	B2	0control	v	spectral	0.972286157813313
lsa27_vowel.txt	52	B2	0control	v	spectral	0.868944509501778
lsa27_vowel.txt	53	B2	0control	v	spectral	0.922121505663563
lsa27_vowel.txt	54	B2	0control	v	spectral	1.01461995480885
lsa27_vowel.txt	55	B2	0control	v	spectral	0.914169647446623
lsa27_vowel.txt	56	B2	0control	v	spectral	0.965450556282458
lsa27_vowel.txt	57	B2	0control	v	spectral	0.911579378359148
lsa27_vowel.txt	58	B2	0control	v	spectral	0.967024239142257
lsa27_vowel.txt	59	B2	0control	v	spectral	1.01512192299287
lsa27_vowel.txt	60	B2	0control	v	spectral	0.952783736705138
lsa27_vowel.txt	31	B2	manipulated	v	spectral	0.977457789600132
lsa27_vowel.txt	32	B2	manipulated	v	spectral	1.01095100301606
lsa27_vowel.txt	33	B2	manipulated	v	spectral	0.890540213126938
lsa27_vowel.txt	34	B2	manipulated	v	spectral	0.900495391843451
lsa27_vowel.txt	35	B2	manipulated	v	spectral	0.934970418830046
lsa27_vowel.txt	36	B2	manipulated	v	spectral	0.922454656884389
lsa27_vowel.txt	37	B2	manipulated	v	spectral	0.961122305337113
lsa27_vowel.txt	38	B2	manipulated	v	spectral	0.904524084620976
lsa27_vowel.txt	39	B2	manipulated	v	spectral	0.968235623443838
lsa27_vowel.txt	40	B2	manipulated	v	spectral	0.933383620845343
lsa27_vowel.txt	41	B2	manipulated	v	spectral	0.945897672185891
lsa27_vowel.txt	42	B2	manipulated	v	spectral	0.997164113901518
lsa27_vowel.txt	43	B2	manipulated	v	spectral	0.979482643461254
lsa27_vowel.txt	44	B2	manipulated	v	spectral	0.969591537349002
lsa27_vowel.txt	45	B2	manipulated	v	spectral	0.937908346113224
lsa27_vowel.txt	46	B2	manipulated	v	spectral	0.961393968735992
lsa27_vowel.txt	47	B2	manipulated	v	spectral	0.979997055443274
lsa27_vowel.txt	48	B2	manipulated	v	spectral	0.941091506982427
lsa27_vowel.txt	49	B2	manipulated	v	spectral	0.999286030720981
lsa27_vowel.txt	50	B2	manipulated	v	spectral	0.910756609187174
lsa27_vowel.txt	51	B2	manipulated	v	spectral	0.931088659421094
lsa27_vowel.txt	52	B2	manipulated	v	spectral	0.86698900914532
lsa27_vowel.txt	53	B2	manipulated	v	spectral	0.894911573940109
lsa27_vowel.txt	54	B2	manipulated	v	spectral	1.00254267226787
lsa27_vowel.txt	55	B2	manipulated	v	spectral	0.925058584498861
lsa27_vowel.txt	56	B2	manipulated	v	spectral	NA
lsa27_vowel.txt	57	B2	manipulated	v	spectral	0.867544560491499
lsa27_vowel.txt	58	B2	manipulated	v	spectral	0.918040430668496
lsa27_vowel.txt	59	B2	manipulated	v	spectral	1.00993886264311
lsa27_vowel.txt	60	B2	manipulated	v	spectral	0.940281631931812
mka28_vowel.txt	31	B2	0control	v	spectral	0.990586605050537
mka28_vowel.txt	32	B2	0control	v	spectral	0.993862254578692
mka28_vowel.txt	33	B2	0control	v	spectral	0.954277361649561
mka28_vowel.txt	34	B2	0control	v	spectral	0.947411246894649
mka28_vowel.txt	35	B2	0control	v	spectral	0.985267478361944
mka28_vowel.txt	36	B2	0control	v	spectral	0.932300249254062
mka28_vowel.txt	37	B2	0control	v	spectral	0.974796639520027
mka28_vowel.txt	38	B2	0control	v	spectral	0.957291441546769
mka28_vowel.txt	39	B2	0control	v	spectral	1.06376413483372
mka28_vowel.txt	40	B2	0control	v	spectral	1.02298759224786
mka28_vowel.txt	41	B2	0control	v	spectral	NA
mka28_vowel.txt	42	B2	0control	v	spectral	0.989346673392328
mka28_vowel.txt	43	B2	0control	v	spectral	0.976294329493653
mka28_vowel.txt	44	B2	0control	v	spectral	0.965771157998741
mka28_vowel.txt	45	B2	0control	v	spectral	NA
mka28_vowel.txt	46	B2	0control	v	spectral	0.993406479832055
mka28_vowel.txt	47	B2	0control	v	spectral	0.983660128551428
mka28_vowel.txt	48	B2	0control	v	spectral	1.01689577504659
mka28_vowel.txt	49	B2	0control	v	spectral	0.998928073775248
mka28_vowel.txt	50	B2	0control	v	spectral	1.01590867016592
mka28_vowel.txt	51	B2	0control	v	spectral	1.00580587361298
mka28_vowel.txt	52	B2	0control	v	spectral	0.964538088535978
mka28_vowel.txt	53	B2	0control	v	spectral	0.961553945651877
mka28_vowel.txt	54	B2	0control	v	spectral	0.97284282722865
mka28_vowel.txt	55	B2	0control	v	spectral	0.977110073279611
mka28_vowel.txt	56	B2	0control	v	spectral	0.991498875957765
mka28_vowel.txt	57	B2	0control	v	spectral	1.030830587175
mka28_vowel.txt	58	B2	0control	v	spectral	1.02495438585789
mka28_vowel.txt	59	B2	0control	v	spectral	0.993211960161286
mka28_vowel.txt	60	B2	0control	v	spectral	0.975216292974808
mka28_vowel.txt	31	B2	manipulated	v	spectral	0.984950672858631
mka28_vowel.txt	32	B2	manipulated	v	spectral	1.01836066133695
mka28_vowel.txt	33	B2	manipulated	v	spectral	1.01598110159587
mka28_vowel.txt	34	B2	manipulated	v	spectral	1.00626210560763
mka28_vowel.txt	35	B2	manipulated	v	spectral	1.02231628925088
mka28_vowel.txt	36	B2	manipulated	v	spectral	0.983774189668085
mka28_vowel.txt	37	B2	manipulated	v	spectral	0.994425315456939
mka28_vowel.txt	38	B2	manipulated	v	spectral	0.988987688530435
mka28_vowel.txt	39	B2	manipulated	v	spectral	1.01785394903352
mka28_vowel.txt	40	B2	manipulated	v	spectral	0.985037841617771
mka28_vowel.txt	41	B2	manipulated	v	spectral	0.938740854230292
mka28_vowel.txt	42	B2	manipulated	v	spectral	NA
mka28_vowel.txt	43	B2	manipulated	v	spectral	1.02052372025015
mka28_vowel.txt	44	B2	manipulated	v	spectral	1.04702235602123
mka28_vowel.txt	45	B2	manipulated	v	spectral	1.01160224424979
mka28_vowel.txt	46	B2	manipulated	v	spectral	1.00730469165685
mka28_vowel.txt	47	B2	manipulated	v	spectral	1.02391032713198
mka28_vowel.txt	48	B2	manipulated	v	spectral	1.00418395863436
mka28_vowel.txt	49	B2	manipulated	v	spectral	0.973554514986749
mka28_vowel.txt	50	B2	manipulated	v	spectral	1.02628605609746
mka28_vowel.txt	51	B2	manipulated	v	spectral	0.974293286310877
mka28_vowel.txt	52	B2	manipulated	v	spectral	0.955244499447605
mka28_vowel.txt	53	B2	manipulated	v	spectral	1.01702919845715
mka28_vowel.txt	54	B2	manipulated	v	spectral	0.963992005856609
mka28_vowel.txt	55	B2	manipulated	v	spectral	0.99243294504149
mka28_vowel.txt	56	B2	manipulated	v	spectral	0.970467909934914
mka28_vowel.txt	57	B2	manipulated	v	spectral	0.936851709691713
mka28_vowel.txt	58	B2	manipulated	v	spectral	1.03134841706788
mka28_vowel.txt	59	B2	manipulated	v	spectral	1.0211866306419
mka28_vowel.txt	60	B2	manipulated	v	spectral	1.04365835202684
pka26_vowel.txt	31	B2	0control	v	spectral	0.838625203405155
pka26_vowel.txt	32	B2	0control	v	spectral	0.928072717155035
pka26_vowel.txt	33	B2	0control	v	spectral	0.837085937155856
pka26_vowel.txt	34	B2	0control	v	spectral	0.954460077098626
pka26_vowel.txt	35	B2	0control	v	spectral	0.929892344127468
pka26_vowel.txt	36	B2	0control	v	spectral	0.980836361537451
pka26_vowel.txt	37	B2	0control	v	spectral	0.92496151164811
pka26_vowel.txt	38	B2	0control	v	spectral	0.999988450605532
pka26_vowel.txt	39	B2	0control	v	spectral	0.872502091808018
pka26_vowel.txt	40	B2	0control	v	spectral	1.05396300962905
pka26_vowel.txt	41	B2	0control	v	spectral	0.884479748122404
pka26_vowel.txt	42	B2	0control	v	spectral	1.03252070646564
pka26_vowel.txt	43	B2	0control	v	spectral	0.920774357583253
pka26_vowel.txt	44	B2	0control	v	spectral	1.06171910141634
pka26_vowel.txt	45	B2	0control	v	spectral	1.01075091170475
pka26_vowel.txt	46	B2	0control	v	spectral	0.869181614056736
pka26_vowel.txt	47	B2	0control	v	spectral	0.948927491767902
pka26_vowel.txt	48	B2	0control	v	spectral	0.997988069662027
pka26_vowel.txt	50	B2	0control	v	spectral	0.977173220862002
pka26_vowel.txt	51	B2	0control	v	spectral	0.955422897048425
pka26_vowel.txt	52	B2	0control	v	spectral	0.96307407677896
pka26_vowel.txt	53	B2	0control	v	spectral	1.02496776560944
pka26_vowel.txt	54	B2	0control	v	spectral	0.981621944002722
pka26_vowel.txt	55	B2	0control	v	spectral	0.953398016955718
pka26_vowel.txt	56	B2	0control	v	spectral	1.02415474495089
pka26_vowel.txt	57	B2	0control	v	spectral	1.0339606622266
pka26_vowel.txt	58	B2	0control	v	spectral	0.96614427898189
pka26_vowel.txt	59	B2	0control	v	spectral	1.06023241176819
pka26_vowel.txt	60	B2	0control	v	spectral	1.09975911441636
pka26_vowel.txt	31	B2	manipulated	v	spectral	0.947914467633216
pka26_vowel.txt	32	B2	manipulated	v	spectral	0.89950289064773
pka26_vowel.txt	33	B2	manipulated	v	spectral	0.933978985562906
pka26_vowel.txt	34	B2	manipulated	v	spectral	0.99951148804691
pka26_vowel.txt	35	B2	manipulated	v	spectral	1.02460849475478
pka26_vowel.txt	36	B2	manipulated	v	spectral	0.901140096177256
pka26_vowel.txt	37	B2	manipulated	v	spectral	0.912020295230838
pka26_vowel.txt	38	B2	manipulated	v	spectral	0.982741519788411
pka26_vowel.txt	39	B2	manipulated	v	spectral	0.946580274554453
pka26_vowel.txt	40	B2	manipulated	v	spectral	0.949857416845885
pka26_vowel.txt	41	B2	manipulated	v	spectral	0.964898417283245
pka26_vowel.txt	42	B2	manipulated	v	spectral	1.0095051358995
pka26_vowel.txt	43	B2	manipulated	v	spectral	0.880446317190949
pka26_vowel.txt	44	B2	manipulated	v	spectral	1.01383423913394
pka26_vowel.txt	45	B2	manipulated	v	spectral	0.992765596793048
pka26_vowel.txt	46	B2	manipulated	v	spectral	1.0566058779997
pka26_vowel.txt	47	B2	manipulated	v	spectral	0.981034651039667
pka26_vowel.txt	48	B2	manipulated	v	spectral	NA
pka26_vowel.txt	49	B2	manipulated	v	spectral	1.04217356143283
pka26_vowel.txt	50	B2	manipulated	v	spectral	1.00148013960759
pka26_vowel.txt	51	B2	manipulated	v	spectral	0.951399813092387
pka26_vowel.txt	52	B2	manipulated	v	spectral	1.01067065914858
pka26_vowel.txt	53	B2	manipulated	v	spectral	1.00121338715766
pka26_vowel.txt	54	B2	manipulated	v	spectral	0.991070104964087
pka26_vowel.txt	55	B2	manipulated	v	spectral	1.04253082677639
pka26_vowel.txt	56	B2	manipulated	v	spectral	0.971611351645831
pka26_vowel.txt	57	B2	manipulated	v	spectral	1.07636761085506
pka26_vowel.txt	58	B2	manipulated	v	spectral	1.02862715028565
pka26_vowel.txt	59	B2	manipulated	v	spectral	0.965956122891688
pka26_vowel.txt	60	B2	manipulated	v	spectral	1.00811644359333
rmd31_vowel.txt	31	B2	0control	v	spectral	0.992373473875662
rmd31_vowel.txt	32	B2	0control	v	spectral	0.950746181910437
rmd31_vowel.txt	33	B2	0control	v	spectral	0.915305713151701
rmd31_vowel.txt	34	B2	0control	v	spectral	0.935823596503722
rmd31_vowel.txt	35	B2	0control	v	spectral	0.923309181586919
rmd31_vowel.txt	36	B2	0control	v	spectral	0.941978966283693
rmd31_vowel.txt	37	B2	0control	v	spectral	0.932268418762966
rmd31_vowel.txt	38	B2	0control	v	spectral	0.967623023948379
rmd31_vowel.txt	39	B2	0control	v	spectral	1.00705694040621
rmd31_vowel.txt	40	B2	0control	v	spectral	1.01365897509959
rmd31_vowel.txt	41	B2	0control	v	spectral	0.983417895719811
rmd31_vowel.txt	42	B2	0control	v	spectral	0.978249145771926
rmd31_vowel.txt	43	B2	0control	v	spectral	1.03968698481169
rmd31_vowel.txt	44	B2	0control	v	spectral	1.03721571883407
rmd31_vowel.txt	45	B2	0control	v	spectral	1.01686383980408
rmd31_vowel.txt	46	B2	0control	v	spectral	1.00044984331015
rmd31_vowel.txt	47	B2	0control	v	spectral	0.99581175601964
rmd31_vowel.txt	48	B2	0control	v	spectral	0.966634838770067
rmd31_vowel.txt	49	B2	0control	v	spectral	0.991902537605282
rmd31_vowel.txt	50	B2	0control	v	spectral	0.955840717449703
rmd31_vowel.txt	51	B2	0control	v	spectral	0.971139140908734
rmd31_vowel.txt	52	B2	0control	v	spectral	0.97828952747537
rmd31_vowel.txt	53	B2	0control	v	spectral	0.914034100486355
rmd31_vowel.txt	54	B2	0control	v	spectral	0.96378114238867
rmd31_vowel.txt	55	B2	0control	v	spectral	0.913820228734186
rmd31_vowel.txt	56	B2	0control	v	spectral	0.904119203328043
rmd31_vowel.txt	57	B2	0control	v	spectral	NA
rmd31_vowel.txt	58	B2	0control	v	spectral	0.908534502570044
rmd31_vowel.txt	59	B2	0control	v	spectral	0.937141947499221
rmd31_vowel.txt	60	B2	0control	v	spectral	0.933457723824991
rmd31_vowel.txt	31	B2	manipulated	v	spectral	0.939952573550565
rmd31_vowel.txt	32	B2	manipulated	v	spectral	0.937398389257064
rmd31_vowel.txt	33	B2	manipulated	v	spectral	0.972753176912417
rmd31_vowel.txt	34	B2	manipulated	v	spectral	0.96198642338097
rmd31_vowel.txt	35	B2	manipulated	v	spectral	0.947290266793016
rmd31_vowel.txt	36	B2	manipulated	v	spectral	0.937418991346415
rmd31_vowel.txt	37	B2	manipulated	v	spectral	0.962080598152987
rmd31_vowel.txt	38	B2	manipulated	v	spectral	0.967016095753445
rmd31_vowel.txt	39	B2	manipulated	v	spectral	0.958843368952608
rmd31_vowel.txt	40	B2	manipulated	v	spectral	0.959324408227759
rmd31_vowel.txt	41	B2	manipulated	v	spectral	0.95220254816525
rmd31_vowel.txt	42	B2	manipulated	v	spectral	0.946061193461257
rmd31_vowel.txt	43	B2	manipulated	v	spectral	0.901598086410208
rmd31_vowel.txt	44	B2	manipulated	v	spectral	0.919318534390051
rmd31_vowel.txt	45	B2	manipulated	v	spectral	0.966714040722585
rmd31_vowel.txt	46	B2	manipulated	v	spectral	0.936789858768846
rmd31_vowel.txt	47	B2	manipulated	v	spectral	0.956271389139213
rmd31_vowel.txt	48	B2	manipulated	v	spectral	0.947356999040767
rmd31_vowel.txt	49	B2	manipulated	v	spectral	0.951827348224122
rmd31_vowel.txt	50	B2	manipulated	v	spectral	0.927645748694571
rmd31_vowel.txt	51	B2	manipulated	v	spectral	NA
rmd31_vowel.txt	52	B2	manipulated	v	spectral	0.920199492492876
rmd31_vowel.txt	53	B2	manipulated	v	spectral	0.920101664190534
rmd31_vowel.txt	54	B2	manipulated	v	spectral	0.918319771740755
rmd31_vowel.txt	55	B2	manipulated	v	spectral	0.955159299146368
rmd31_vowel.txt	56	B2	manipulated	v	spectral	0.929575273569695
rmd31_vowel.txt	57	B2	manipulated	v	spectral	0.923859505017372
rmd31_vowel.txt	58	B2	manipulated	v	spectral	0.918567346013694
rmd31_vowel.txt	59	B2	manipulated	v	spectral	0.939083646375
rmd31_vowel.txt	60	B2	manipulated	v	spectral	0.937896962553957
sba05_vowel.txt	31	B2	0control	v	spectral	1.00898145918685
sba05_vowel.txt	32	B2	0control	v	spectral	0.938065838672545
sba05_vowel.txt	33	B2	0control	v	spectral	0.906080604649604
sba05_vowel.txt	34	B2	0control	v	spectral	0.891866380858694
sba05_vowel.txt	35	B2	0control	v	spectral	0.997026838676225
sba05_vowel.txt	36	B2	0control	v	spectral	0.929085489005554
sba05_vowel.txt	37	B2	0control	v	spectral	0.901413373700754
sba05_vowel.txt	38	B2	0control	v	spectral	0.871524113335604
sba05_vowel.txt	39	B2	0control	v	spectral	0.876190241224484
sba05_vowel.txt	40	B2	0control	v	spectral	0.88562719868127
sba05_vowel.txt	41	B2	0control	v	spectral	0.929505028963243
sba05_vowel.txt	42	B2	0control	v	spectral	0.862373310374762
sba05_vowel.txt	43	B2	0control	v	spectral	0.917335193435358
sba05_vowel.txt	44	B2	0control	v	spectral	0.911574751788207
sba05_vowel.txt	45	B2	0control	v	spectral	0.907692280962051
sba05_vowel.txt	46	B2	0control	v	spectral	0.8952771740605
sba05_vowel.txt	47	B2	0control	v	spectral	0.800755424660764
sba05_vowel.txt	48	B2	0control	v	spectral	0.841955468911003
sba05_vowel.txt	49	B2	0control	v	spectral	0.856897987462879
sba05_vowel.txt	50	B2	0control	v	spectral	0.877817613337677
sba05_vowel.txt	51	B2	0control	v	spectral	0.836629802075128
sba05_vowel.txt	52	B2	0control	v	spectral	0.869045563942305
sba05_vowel.txt	53	B2	0control	v	spectral	NA
sba05_vowel.txt	54	B2	0control	v	spectral	0.887309907664587
sba05_vowel.txt	55	B2	0control	v	spectral	0.934990229645048
sba05_vowel.txt	56	B2	0control	v	spectral	0.894385060152001
sba05_vowel.txt	57	B2	0control	v	spectral	0.847576184999716
sba05_vowel.txt	58	B2	0control	v	spectral	0.881163081909203
sba05_vowel.txt	59	B2	0control	v	spectral	0.815475497511091
sba05_vowel.txt	60	B2	0control	v	spectral	0.890395936558659
sba05_vowel.txt	31	B2	manipulated	v	spectral	NA
sba05_vowel.txt	32	B2	manipulated	v	spectral	0.910226524644674
sba05_vowel.txt	33	B2	manipulated	v	spectral	0.947628799691154
sba05_vowel.txt	34	B2	manipulated	v	spectral	0.885546676105194
sba05_vowel.txt	35	B2	manipulated	v	spectral	0.890663272668164
sba05_vowel.txt	36	B2	manipulated	v	spectral	0.854501643084688
sba05_vowel.txt	37	B2	manipulated	v	spectral	0.92109813038947
sba05_vowel.txt	38	B2	manipulated	v	spectral	0.86744263464238
sba05_vowel.txt	39	B2	manipulated	v	spectral	0.909613153544885
sba05_vowel.txt	40	B2	manipulated	v	spectral	0.906404978771499
sba05_vowel.txt	41	B2	manipulated	v	spectral	0.850002312480957
sba05_vowel.txt	42	B2	manipulated	v	spectral	0.86051849263012
sba05_vowel.txt	43	B2	manipulated	v	spectral	0.883541834751271
sba05_vowel.txt	44	B2	manipulated	v	spectral	0.882842395305785
sba05_vowel.txt	45	B2	manipulated	v	spectral	0.879490829339594
sba05_vowel.txt	46	B2	manipulated	v	spectral	0.911482240243645
sba05_vowel.txt	47	B2	manipulated	v	spectral	0.840717611902848
sba05_vowel.txt	48	B2	manipulated	v	spectral	0.864130053941468
sba05_vowel.txt	49	B2	manipulated	v	spectral	0.900527095873184
sba05_vowel.txt	50	B2	manipulated	v	spectral	0.85394953767634
sba05_vowel.txt	51	B2	manipulated	v	spectral	0.839152605078041
sba05_vowel.txt	52	B2	manipulated	v	spectral	0.879377066032156
sba05_vowel.txt	53	B2	manipulated	v	spectral	0.904963847548243
sba05_vowel.txt	54	B2	manipulated	v	spectral	0.890416855104525
sba05_vowel.txt	55	B2	manipulated	v	spectral	0.879115893053505
sba05_vowel.txt	56	B2	manipulated	v	spectral	0.825907678342965
sba05_vowel.txt	57	B2	manipulated	v	spectral	0.846335040677028
sba05_vowel.txt	58	B2	manipulated	v	spectral	0.84692778212006
sba05_vowel.txt	59	B2	manipulated	v	spectral	0.83709832878059
sba05_vowel.txt	60	B2	manipulated	v	spectral	0.868950084695971
sbe08_vowel.txt	31	B2	0control	v	spectral	0.973244254051778
sbe08_vowel.txt	32	B2	0control	v	spectral	0.955739569649821
sbe08_vowel.txt	33	B2	0control	v	spectral	1.02763476956978
sbe08_vowel.txt	34	B2	0control	v	spectral	0.996591440391544
sbe08_vowel.txt	35	B2	0control	v	spectral	0.964500226444023
sbe08_vowel.txt	36	B2	0control	v	spectral	0.994642967761069
sbe08_vowel.txt	37	B2	0control	v	spectral	1.08654333144211
sbe08_vowel.txt	38	B2	0control	v	spectral	1.05027693008994
sbe08_vowel.txt	39	B2	0control	v	spectral	1.01186667439077
sbe08_vowel.txt	40	B2	0control	v	spectral	0.960458984492901
sbe08_vowel.txt	41	B2	0control	v	spectral	1.03541012946063
sbe08_vowel.txt	42	B2	0control	v	spectral	1.02946866758376
sbe08_vowel.txt	43	B2	0control	v	spectral	0.974348411529598
sbe08_vowel.txt	44	B2	0control	v	spectral	1.06484932456878
sbe08_vowel.txt	45	B2	0control	v	spectral	1.10594335896429
sbe08_vowel.txt	46	B2	0control	v	spectral	1.08469054664926
sbe08_vowel.txt	47	B2	0control	v	spectral	1.0037888250261
sbe08_vowel.txt	48	B2	0control	v	spectral	NA
sbe08_vowel.txt	49	B2	0control	v	spectral	1.09981501619493
sbe08_vowel.txt	50	B2	0control	v	spectral	0.967150118161703
sbe08_vowel.txt	52	B2	0control	v	spectral	1.14051767322578
sbe08_vowel.txt	53	B2	0control	v	spectral	0.995306018694334
sbe08_vowel.txt	54	B2	0control	v	spectral	1.09298609540807
sbe08_vowel.txt	55	B2	0control	v	spectral	1.0294931384362
sbe08_vowel.txt	56	B2	0control	v	spectral	1.08855780724488
sbe08_vowel.txt	57	B2	0control	v	spectral	1.02180115272984
sbe08_vowel.txt	58	B2	0control	v	spectral	NA
sbe08_vowel.txt	59	B2	0control	v	spectral	1.01472001837422
sbe08_vowel.txt	60	B2	0control	v	spectral	1.04894691687122
sbe08_vowel.txt	31	B2	manipulated	v	spectral	1.0069931451193
sbe08_vowel.txt	32	B2	manipulated	v	spectral	0.962178844326704
sbe08_vowel.txt	33	B2	manipulated	v	spectral	0.992991920387138
sbe08_vowel.txt	34	B2	manipulated	v	spectral	1.00288336322362
sbe08_vowel.txt	35	B2	manipulated	v	spectral	0.97234504440427
sbe08_vowel.txt	36	B2	manipulated	v	spectral	1.01710221574627
sbe08_vowel.txt	37	B2	manipulated	v	spectral	0.970612148603557
sbe08_vowel.txt	38	B2	manipulated	v	spectral	0.940750411223591
sbe08_vowel.txt	39	B2	manipulated	v	spectral	1.0344620703675
sbe08_vowel.txt	40	B2	manipulated	v	spectral	1.01019735951275
sbe08_vowel.txt	41	B2	manipulated	v	spectral	0.951503386744184
sbe08_vowel.txt	42	B2	manipulated	v	spectral	0.961832513717507
sbe08_vowel.txt	43	B2	manipulated	v	spectral	0.998915311144013
sbe08_vowel.txt	44	B2	manipulated	v	spectral	NA
sbe08_vowel.txt	45	B2	manipulated	v	spectral	1.07692831038799
sbe08_vowel.txt	46	B2	manipulated	v	spectral	1.02298505181822
sbe08_vowel.txt	47	B2	manipulated	v	spectral	0.988386168188096
sbe08_vowel.txt	48	B2	manipulated	v	spectral	0.96557216247598
sbe08_vowel.txt	49	B2	manipulated	v	spectral	1.05808869279503
sbe08_vowel.txt	50	B2	manipulated	v	spectral	0.989630608684741
sbe08_vowel.txt	51	B2	manipulated	v	spectral	1.04255796172542
sbe08_vowel.txt	52	B2	manipulated	v	spectral	1.06116713912522
sbe08_vowel.txt	53	B2	manipulated	v	spectral	1.00491866768538
sbe08_vowel.txt	54	B2	manipulated	v	spectral	1.01072340121513
sbe08_vowel.txt	55	B2	manipulated	v	spectral	1.07025445639855
sbe08_vowel.txt	56	B2	manipulated	v	spectral	1.0276673474765
sbe08_vowel.txt	57	B2	manipulated	v	spectral	0.99035179598205
sbe08_vowel.txt	58	B2	manipulated	v	spectral	1.00995989227571
sbe08_vowel.txt	59	B2	manipulated	v	spectral	1.01751456644061
sbe08_vowel.txt	60	B2	manipulated	v	spectral	1.00276085572666
smm27_vowel.txt	31	B2	0control	v	spectral	1.0246029500621
smm27_vowel.txt	32	B2	0control	v	spectral	1.01613591896635
smm27_vowel.txt	33	B2	0control	v	spectral	0.986571762664996
smm27_vowel.txt	34	B2	0control	v	spectral	NA
smm27_vowel.txt	35	B2	0control	v	spectral	1.01096554737093
smm27_vowel.txt	36	B2	0control	v	spectral	1.00237184400062
smm27_vowel.txt	37	B2	0control	v	spectral	0.953044558992069
smm27_vowel.txt	38	B2	0control	v	spectral	0.996858110624927
smm27_vowel.txt	39	B2	0control	v	spectral	1.0074111977526
smm27_vowel.txt	40	B2	0control	v	spectral	0.966886631296522
smm27_vowel.txt	41	B2	0control	v	spectral	0.939267821313654
smm27_vowel.txt	42	B2	0control	v	spectral	0.974643945594468
smm27_vowel.txt	43	B2	0control	v	spectral	0.995918386471038
smm27_vowel.txt	44	B2	0control	v	spectral	0.971684761870911
smm27_vowel.txt	45	B2	0control	v	spectral	0.982193358373684
smm27_vowel.txt	46	B2	0control	v	spectral	0.944290598501617
smm27_vowel.txt	47	B2	0control	v	spectral	0.955639934936688
smm27_vowel.txt	48	B2	0control	v	spectral	0.972342938166593
smm27_vowel.txt	49	B2	0control	v	spectral	0.958025397035973
smm27_vowel.txt	50	B2	0control	v	spectral	1.01163334752486
smm27_vowel.txt	51	B2	0control	v	spectral	0.99978135118916
smm27_vowel.txt	52	B2	0control	v	spectral	1.0154325325258
smm27_vowel.txt	53	B2	0control	v	spectral	0.965958515848446
smm27_vowel.txt	54	B2	0control	v	spectral	1.00230969892275
smm27_vowel.txt	55	B2	0control	v	spectral	0.943596031222442
smm27_vowel.txt	56	B2	0control	v	spectral	1.02576377907102
smm27_vowel.txt	57	B2	0control	v	spectral	0.96179129516547
smm27_vowel.txt	58	B2	0control	v	spectral	0.991926301675544
smm27_vowel.txt	59	B2	0control	v	spectral	0.929302600559573
smm27_vowel.txt	60	B2	0control	v	spectral	0.960265984783019
smm27_vowel.txt	31	B2	manipulated	v	spectral	1.04175999603881
smm27_vowel.txt	32	B2	manipulated	v	spectral	1.01597634879346
smm27_vowel.txt	33	B2	manipulated	v	spectral	0.978842791453034
smm27_vowel.txt	34	B2	manipulated	v	spectral	0.985024661435723
smm27_vowel.txt	35	B2	manipulated	v	spectral	1.05171458536429
smm27_vowel.txt	36	B2	manipulated	v	spectral	0.992455776722548
smm27_vowel.txt	37	B2	manipulated	v	spectral	1.02212517188817
smm27_vowel.txt	38	B2	manipulated	v	spectral	1.01615436148861
smm27_vowel.txt	39	B2	manipulated	v	spectral	0.955161599398515
smm27_vowel.txt	40	B2	manipulated	v	spectral	0.968116583357128
smm27_vowel.txt	41	B2	manipulated	v	spectral	1.02142355344041
smm27_vowel.txt	42	B2	manipulated	v	spectral	0.98938146733517
smm27_vowel.txt	43	B2	manipulated	v	spectral	0.981536639621024
smm27_vowel.txt	44	B2	manipulated	v	spectral	0.982832822498445
smm27_vowel.txt	45	B2	manipulated	v	spectral	0.947886236058342
smm27_vowel.txt	46	B2	manipulated	v	spectral	1.01555918525555
smm27_vowel.txt	47	B2	manipulated	v	spectral	1.0531930618253
smm27_vowel.txt	48	B2	manipulated	v	spectral	1.01682690507679
smm27_vowel.txt	49	B2	manipulated	v	spectral	0.976455319088455
smm27_vowel.txt	50	B2	manipulated	v	spectral	0.955514557931625
smm27_vowel.txt	51	B2	manipulated	v	spectral	1.01294120861892
smm27_vowel.txt	52	B2	manipulated	v	spectral	0.970920283957785
smm27_vowel.txt	53	B2	manipulated	v	spectral	0.990116772569395
smm27_vowel.txt	54	B2	manipulated	v	spectral	0.995493766902612
smm27_vowel.txt	55	B2	manipulated	v	spectral	1.03773973424361
smm27_vowel.txt	56	B2	manipulated	v	spectral	0.983496843616156
smm27_vowel.txt	57	B2	manipulated	v	spectral	0.969832410263912
smm27_vowel.txt	58	B2	manipulated	v	spectral	0.941093873916392
smm27_vowel.txt	59	B2	manipulated	v	spectral	0.977498354255142
smm27_vowel.txt	60	B2	manipulated	v	spectral	0.979774069875599
ssb12_vowel.txt	31	B2	0control	v	spectral	0.927441397073739
ssb12_vowel.txt	32	B2	0control	v	spectral	0.896794408101208
ssb12_vowel.txt	33	B2	0control	v	spectral	0.961480727977004
ssb12_vowel.txt	34	B2	0control	v	spectral	0.919217526057938
ssb12_vowel.txt	35	B2	0control	v	spectral	0.876139995000837
ssb12_vowel.txt	36	B2	0control	v	spectral	0.916950845310555
ssb12_vowel.txt	37	B2	0control	v	spectral	NA
ssb12_vowel.txt	38	B2	0control	v	spectral	0.874999212070652
ssb12_vowel.txt	39	B2	0control	v	spectral	0.922478871726779
ssb12_vowel.txt	40	B2	0control	v	spectral	0.894406687928556
ssb12_vowel.txt	41	B2	0control	v	spectral	0.879469846397205
ssb12_vowel.txt	42	B2	0control	v	spectral	0.947565507307731
ssb12_vowel.txt	43	B2	0control	v	spectral	0.932268115610271
ssb12_vowel.txt	44	B2	0control	v	spectral	0.973648983678739
ssb12_vowel.txt	45	B2	0control	v	spectral	0.929581389652418
ssb12_vowel.txt	46	B2	0control	v	spectral	0.937930331406583
ssb12_vowel.txt	47	B2	0control	v	spectral	0.905489890107658
ssb12_vowel.txt	48	B2	0control	v	spectral	0.952382813505934
ssb12_vowel.txt	49	B2	0control	v	spectral	0.903948271176244
ssb12_vowel.txt	50	B2	0control	v	spectral	0.937084659288917
ssb12_vowel.txt	51	B2	0control	v	spectral	0.932376785926038
ssb12_vowel.txt	52	B2	0control	v	spectral	0.923547096964907
ssb12_vowel.txt	53	B2	0control	v	spectral	0.890757011943176
ssb12_vowel.txt	54	B2	0control	v	spectral	0.901454848612031
ssb12_vowel.txt	55	B2	0control	v	spectral	0.92582273099556
ssb12_vowel.txt	56	B2	0control	v	spectral	0.967186601409633
ssb12_vowel.txt	57	B2	0control	v	spectral	0.94560873416051
ssb12_vowel.txt	58	B2	0control	v	spectral	0.962916286252204
ssb12_vowel.txt	59	B2	0control	v	spectral	0.908084223349623
ssb12_vowel.txt	60	B2	0control	v	spectral	0.931382030923256
ssb12_vowel.txt	31	B2	manipulated	v	spectral	0.958384910443648
ssb12_vowel.txt	32	B2	manipulated	v	spectral	0.987028836554951
ssb12_vowel.txt	33	B2	manipulated	v	spectral	1.01156114414721
ssb12_vowel.txt	34	B2	manipulated	v	spectral	0.914115727865067
ssb12_vowel.txt	35	B2	manipulated	v	spectral	0.921718278894148
ssb12_vowel.txt	36	B2	manipulated	v	spectral	0.897222862297596
ssb12_vowel.txt	37	B2	manipulated	v	spectral	0.926449933823067
ssb12_vowel.txt	38	B2	manipulated	v	spectral	0.930716380863085
ssb12_vowel.txt	39	B2	manipulated	v	spectral	0.908768003692662
ssb12_vowel.txt	40	B2	manipulated	v	spectral	0.911857549337607
ssb12_vowel.txt	41	B2	manipulated	v	spectral	0.962354641928272
ssb12_vowel.txt	42	B2	manipulated	v	spectral	0.926663796534041
ssb12_vowel.txt	43	B2	manipulated	v	spectral	0.972553153383631
ssb12_vowel.txt	44	B2	manipulated	v	spectral	0.928686467021994
ssb12_vowel.txt	45	B2	manipulated	v	spectral	0.906988914168516
ssb12_vowel.txt	46	B2	manipulated	v	spectral	0.909983217935565
ssb12_vowel.txt	47	B2	manipulated	v	spectral	0.940912667185239
ssb12_vowel.txt	48	B2	manipulated	v	spectral	0.965105477032046
ssb12_vowel.txt	49	B2	manipulated	v	spectral	0.969938014593801
ssb12_vowel.txt	50	B2	manipulated	v	spectral	0.895139501042032
ssb12_vowel.txt	51	B2	manipulated	v	spectral	0.922960819328957
ssb12_vowel.txt	52	B2	manipulated	v	spectral	0.943962003359277
ssb12_vowel.txt	53	B2	manipulated	v	spectral	0.954692260344172
ssb12_vowel.txt	54	B2	manipulated	v	spectral	0.990871973920755
ssb12_vowel.txt	55	B2	manipulated	v	spectral	1.01322417759318
ssb12_vowel.txt	56	B2	manipulated	v	spectral	0.987519789189391
ssb12_vowel.txt	57	B2	manipulated	v	spectral	0.935485296733235
ssb12_vowel.txt	58	B2	manipulated	v	spectral	1.01956923336305
ssb12_vowel.txt	59	B2	manipulated	v	spectral	0.946519587950383
ssb12_vowel.txt	60	B2	manipulated	v	spectral	1.00522610349415
tse24_vowel.txt	31	B2	0control	v	spectral	1.00691655458948
tse24_vowel.txt	32	B2	0control	v	spectral	1.00957309839123
tse24_vowel.txt	33	B2	0control	v	spectral	0.99628439421936
tse24_vowel.txt	34	B2	0control	v	spectral	0.98945361230459
tse24_vowel.txt	35	B2	0control	v	spectral	1.02302594787057
tse24_vowel.txt	36	B2	0control	v	spectral	0.989468535790939
tse24_vowel.txt	37	B2	0control	v	spectral	1.02133729982711
tse24_vowel.txt	38	B2	0control	v	spectral	1.01516815595012
tse24_vowel.txt	39	B2	0control	v	spectral	1.00471863862767
tse24_vowel.txt	40	B2	0control	v	spectral	0.975294533454122
tse24_vowel.txt	41	B2	0control	v	spectral	0.993933221930316
tse24_vowel.txt	42	B2	0control	v	spectral	1.00415205340903
tse24_vowel.txt	43	B2	0control	v	spectral	0.981080545454204
tse24_vowel.txt	44	B2	0control	v	spectral	1.02590875269962
tse24_vowel.txt	45	B2	0control	v	spectral	0.998857828283937
tse24_vowel.txt	46	B2	0control	v	spectral	0.98534363357559
tse24_vowel.txt	47	B2	0control	v	spectral	0.994694402818791
tse24_vowel.txt	48	B2	0control	v	spectral	NA
tse24_vowel.txt	49	B2	0control	v	spectral	0.992528001077654
tse24_vowel.txt	50	B2	0control	v	spectral	0.968350344757046
tse24_vowel.txt	51	B2	0control	v	spectral	0.993964795106341
tse24_vowel.txt	52	B2	0control	v	spectral	0.987251632027401
tse24_vowel.txt	53	B2	0control	v	spectral	1.00141887212765
tse24_vowel.txt	54	B2	0control	v	spectral	1.01453236232105
tse24_vowel.txt	55	B2	0control	v	spectral	0.997950833470368
tse24_vowel.txt	56	B2	0control	v	spectral	1.00991133387492
tse24_vowel.txt	57	B2	0control	v	spectral	1.00691248418841
tse24_vowel.txt	58	B2	0control	v	spectral	0.98896628670249
tse24_vowel.txt	59	B2	0control	v	spectral	1.00686262519666
tse24_vowel.txt	60	B2	0control	v	spectral	0.992338249935585
tse24_vowel.txt	31	B2	manipulated	v	spectral	1.03435446933311
tse24_vowel.txt	32	B2	manipulated	v	spectral	1.05718736891002
tse24_vowel.txt	33	B2	manipulated	v	spectral	1.03785791673727
tse24_vowel.txt	34	B2	manipulated	v	spectral	1.00967329497458
tse24_vowel.txt	35	B2	manipulated	v	spectral	0.980267723389622
tse24_vowel.txt	36	B2	manipulated	v	spectral	0.992885478487013
tse24_vowel.txt	37	B2	manipulated	v	spectral	1.00270284517138
tse24_vowel.txt	38	B2	manipulated	v	spectral	1.00390317286435
tse24_vowel.txt	39	B2	manipulated	v	spectral	1.01725331008594
tse24_vowel.txt	40	B2	manipulated	v	spectral	0.98150026943758
tse24_vowel.txt	41	B2	manipulated	v	spectral	0.985292294501824
tse24_vowel.txt	42	B2	manipulated	v	spectral	1.0394421742994
tse24_vowel.txt	43	B2	manipulated	v	spectral	0.944932821190593
tse24_vowel.txt	44	B2	manipulated	v	spectral	0.97107406909435
tse24_vowel.txt	45	B2	manipulated	v	spectral	1.00340756817582
tse24_vowel.txt	46	B2	manipulated	v	spectral	0.926092591369322
tse24_vowel.txt	47	B2	manipulated	v	spectral	0.967831907030089
tse24_vowel.txt	48	B2	manipulated	v	spectral	0.955896455240399
tse24_vowel.txt	49	B2	manipulated	v	spectral	0.940922147904081
tse24_vowel.txt	50	B2	manipulated	v	spectral	0.962677647393204
tse24_vowel.txt	51	B2	manipulated	v	spectral	0.945774074545196
tse24_vowel.txt	52	B2	manipulated	v	spectral	1.02048025392886
tse24_vowel.txt	53	B2	manipulated	v	spectral	1.02641624310195
tse24_vowel.txt	54	B2	manipulated	v	spectral	1.0210580339778
tse24_vowel.txt	55	B2	manipulated	v	spectral	1.01115737086398
tse24_vowel.txt	57	B2	manipulated	v	spectral	0.994615800292997
tse24_vowel.txt	58	B2	manipulated	v	spectral	1.01792471490345
tse24_vowel.txt	59	B2	manipulated	v	spectral	1.00014963559206
tse24_vowel.txt	60	B2	manipulated	v	spectral	0.955317614589328
uve29_vowel.txt	31	B2	0control	v	spectral	1.02388722309287
uve29_vowel.txt	32	B2	0control	v	spectral	0.964579630195413
uve29_vowel.txt	33	B2	0control	v	spectral	0.95721113778603
uve29_vowel.txt	34	B2	0control	v	spectral	0.924896499708054
uve29_vowel.txt	35	B2	0control	v	spectral	0.95961830236869
uve29_vowel.txt	36	B2	0control	v	spectral	0.977064868479178
uve29_vowel.txt	37	B2	0control	v	spectral	0.973739814488467
uve29_vowel.txt	38	B2	0control	v	spectral	1.02113086926994
uve29_vowel.txt	39	B2	0control	v	spectral	1.09047331317274
uve29_vowel.txt	40	B2	0control	v	spectral	1.05337658820106
uve29_vowel.txt	41	B2	0control	v	spectral	1.12292651809818
uve29_vowel.txt	42	B2	0control	v	spectral	NA
uve29_vowel.txt	43	B2	0control	v	spectral	1.07716900438949
uve29_vowel.txt	44	B2	0control	v	spectral	0.971557829666626
uve29_vowel.txt	45	B2	0control	v	spectral	1.08862488188821
uve29_vowel.txt	46	B2	0control	v	spectral	1.04688576346835
uve29_vowel.txt	47	B2	0control	v	spectral	1.12845063188475
uve29_vowel.txt	48	B2	0control	v	spectral	1.02784455261003
uve29_vowel.txt	49	B2	0control	v	spectral	1.0885582920151
uve29_vowel.txt	50	B2	0control	v	spectral	0.995688074663501
uve29_vowel.txt	51	B2	0control	v	spectral	1.10213694391638
uve29_vowel.txt	52	B2	0control	v	spectral	1.1152689067807
uve29_vowel.txt	53	B2	0control	v	spectral	1.15109361787648
uve29_vowel.txt	54	B2	0control	v	spectral	1.03405115308954
uve29_vowel.txt	55	B2	0control	v	spectral	1.08502979655812
uve29_vowel.txt	56	B2	0control	v	spectral	1.00413737829355
uve29_vowel.txt	57	B2	0control	v	spectral	1.04674122841259
uve29_vowel.txt	58	B2	0control	v	spectral	1.09705815844988
uve29_vowel.txt	59	B2	0control	v	spectral	1.02313914614591
uve29_vowel.txt	60	B2	0control	v	spectral	0.976268716538132
uve29_vowel.txt	31	B2	manipulated	v	spectral	0.996170850462486
uve29_vowel.txt	32	B2	manipulated	v	spectral	0.981491027323959
uve29_vowel.txt	33	B2	manipulated	v	spectral	0.961752101290841
uve29_vowel.txt	34	B2	manipulated	v	spectral	0.961649249739982
uve29_vowel.txt	35	B2	manipulated	v	spectral	1.05758065829247
uve29_vowel.txt	36	B2	manipulated	v	spectral	1.01432390468954
uve29_vowel.txt	37	B2	manipulated	v	spectral	1.02527278037385
uve29_vowel.txt	38	B2	manipulated	v	spectral	1.00851944608822
uve29_vowel.txt	39	B2	manipulated	v	spectral	1.01481043888637
uve29_vowel.txt	40	B2	manipulated	v	spectral	1.0264539043634
uve29_vowel.txt	41	B2	manipulated	v	spectral	0.949577987678937
uve29_vowel.txt	42	B2	manipulated	v	spectral	1.00426913213403
uve29_vowel.txt	43	B2	manipulated	v	spectral	0.926553264214963
uve29_vowel.txt	44	B2	manipulated	v	spectral	0.984946240713174
uve29_vowel.txt	45	B2	manipulated	v	spectral	0.992128290070767
uve29_vowel.txt	46	B2	manipulated	v	spectral	0.99237208869875
uve29_vowel.txt	47	B2	manipulated	v	spectral	1.03727966147757
uve29_vowel.txt	48	B2	manipulated	v	spectral	1.02247343863595
uve29_vowel.txt	49	B2	manipulated	v	spectral	1.13467785492913
uve29_vowel.txt	50	B2	manipulated	v	spectral	1.04801154968169
uve29_vowel.txt	51	B2	manipulated	v	spectral	1.05572277667186
uve29_vowel.txt	52	B2	manipulated	v	spectral	1.0834597747116
uve29_vowel.txt	53	B2	manipulated	v	spectral	1.08404228709342
uve29_vowel.txt	54	B2	manipulated	v	spectral	1.10670478967976
uve29_vowel.txt	55	B2	manipulated	v	spectral	1.10985155642355
uve29_vowel.txt	56	B2	manipulated	v	spectral	0.926905758586261
uve29_vowel.txt	57	B2	manipulated	v	spectral	0.932602133889903
uve29_vowel.txt	58	B2	manipulated	v	spectral	1.08936832423224
uve29_vowel.txt	59	B2	manipulated	v	spectral	1.10419386476775
uve29_vowel.txt	60	B2	manipulated	v	spectral	1.04269239972739
asn12_vowel.txt	31	B2	0control	f	spectral	0.953399258591869
asn12_vowel.txt	32	B2	0control	f	spectral	1.0042615917337
asn12_vowel.txt	33	B2	0control	f	spectral	0.971837194812143
asn12_vowel.txt	34	B2	0control	f	spectral	1.02325702450994
asn12_vowel.txt	35	B2	0control	f	spectral	NA
asn12_vowel.txt	36	B2	0control	f	spectral	0.943494263670363
asn12_vowel.txt	37	B2	0control	f	spectral	0.972498130104581
asn12_vowel.txt	38	B2	0control	f	spectral	1.02274662910099
asn12_vowel.txt	39	B2	0control	f	spectral	0.966696183344934
asn12_vowel.txt	40	B2	0control	f	spectral	0.978579528312824
asn12_vowel.txt	41	B2	0control	f	spectral	0.981726538621496
asn12_vowel.txt	42	B2	0control	f	spectral	0.939734713195734
asn12_vowel.txt	43	B2	0control	f	spectral	0.95494117308305
asn12_vowel.txt	44	B2	0control	f	spectral	0.983335890599125
asn12_vowel.txt	45	B2	0control	f	spectral	0.983118172873369
asn12_vowel.txt	46	B2	0control	f	spectral	0.98685015462194
asn12_vowel.txt	47	B2	0control	f	spectral	0.992946982432831
asn12_vowel.txt	48	B2	0control	f	spectral	0.977183427809244
asn12_vowel.txt	49	B2	0control	f	spectral	0.969892075824261
asn12_vowel.txt	50	B2	0control	f	spectral	0.983360826258034
asn12_vowel.txt	51	B2	0control	f	spectral	0.988899075953351
asn12_vowel.txt	52	B2	0control	f	spectral	0.972266591640331
asn12_vowel.txt	53	B2	0control	f	spectral	0.941994096199633
asn12_vowel.txt	54	B2	0control	f	spectral	0.965236299853033
asn12_vowel.txt	55	B2	0control	f	spectral	0.970527201444475
asn12_vowel.txt	56	B2	0control	f	spectral	1.00556719082083
asn12_vowel.txt	57	B2	0control	f	spectral	1.03731332322579
asn12_vowel.txt	58	B2	0control	f	spectral	1.02827808874535
asn12_vowel.txt	59	B2	0control	f	spectral	0.977216790466899
asn12_vowel.txt	60	B2	0control	f	spectral	1.00953683757233
asn12_vowel.txt	31	B2	manipulated	f	spectral	0.978487009147778
asn12_vowel.txt	32	B2	manipulated	f	spectral	0.986237122122471
asn12_vowel.txt	33	B2	manipulated	f	spectral	1.0023409489373
asn12_vowel.txt	34	B2	manipulated	f	spectral	0.976106048003181
asn12_vowel.txt	35	B2	manipulated	f	spectral	0.969238385676054
asn12_vowel.txt	36	B2	manipulated	f	spectral	0.99938068522062
asn12_vowel.txt	37	B2	manipulated	f	spectral	1.00620480348378
asn12_vowel.txt	38	B2	manipulated	f	spectral	1.0051046691851
asn12_vowel.txt	39	B2	manipulated	f	spectral	1.03937279770433
asn12_vowel.txt	40	B2	manipulated	f	spectral	1.02011428449552
asn12_vowel.txt	41	B2	manipulated	f	spectral	1.01648923032897
asn12_vowel.txt	42	B2	manipulated	f	spectral	0.969424283553183
asn12_vowel.txt	43	B2	manipulated	f	spectral	0.985593933613525
asn12_vowel.txt	44	B2	manipulated	f	spectral	1.02580289940682
asn12_vowel.txt	45	B2	manipulated	f	spectral	1.02338224764731
asn12_vowel.txt	46	B2	manipulated	f	spectral	1.03023923158062
asn12_vowel.txt	47	B2	manipulated	f	spectral	0.966544773821232
asn12_vowel.txt	48	B2	manipulated	f	spectral	0.993275795364122
asn12_vowel.txt	49	B2	manipulated	f	spectral	0.965582658903292
asn12_vowel.txt	50	B2	manipulated	f	spectral	1.01027627478054
asn12_vowel.txt	51	B2	manipulated	f	spectral	1.03567272809519
asn12_vowel.txt	52	B2	manipulated	f	spectral	1.01524019475142
asn12_vowel.txt	53	B2	manipulated	f	spectral	1.0494858148461
asn12_vowel.txt	54	B2	manipulated	f	spectral	0.972426586844365
asn12_vowel.txt	55	B2	manipulated	f	spectral	0.970498381521524
asn12_vowel.txt	56	B2	manipulated	f	spectral	0.967266683455475
asn12_vowel.txt	57	B2	manipulated	f	spectral	1.0033317747168
asn12_vowel.txt	58	B2	manipulated	f	spectral	1.05095132301867
asn12_vowel.txt	59	B2	manipulated	f	spectral	1.02160467185376
asn12_vowel.txt	60	B2	manipulated	f	spectral	1.00349582889222
bhk23_vowel.txt	31	B2	0control	f	spectral	1.02697140290356
bhk23_vowel.txt	32	B2	0control	f	spectral	0.989028799051597
bhk23_vowel.txt	33	B2	0control	f	spectral	NA
bhk23_vowel.txt	34	B2	0control	f	spectral	0.982684410316853
bhk23_vowel.txt	35	B2	0control	f	spectral	0.975751926093229
bhk23_vowel.txt	36	B2	0control	f	spectral	0.995279914038095
bhk23_vowel.txt	37	B2	0control	f	spectral	1.0363831695038
bhk23_vowel.txt	38	B2	0control	f	spectral	0.976672091641928
bhk23_vowel.txt	39	B2	0control	f	spectral	1.00932976160287
bhk23_vowel.txt	40	B2	0control	f	spectral	0.98409972692375
bhk23_vowel.txt	41	B2	0control	f	spectral	1.01177967353947
bhk23_vowel.txt	42	B2	0control	f	spectral	1.01616732254913
bhk23_vowel.txt	43	B2	0control	f	spectral	1.03120584022335
bhk23_vowel.txt	44	B2	0control	f	spectral	0.981139891369681
bhk23_vowel.txt	45	B2	0control	f	spectral	1.02168740215602
bhk23_vowel.txt	46	B2	0control	f	spectral	1.00246732052383
bhk23_vowel.txt	47	B2	0control	f	spectral	1.00679508908822
bhk23_vowel.txt	48	B2	0control	f	spectral	1.01941254994287
bhk23_vowel.txt	49	B2	0control	f	spectral	1.00978000716893
bhk23_vowel.txt	50	B2	0control	f	spectral	NA
bhk23_vowel.txt	51	B2	0control	f	spectral	1.02784293638179
bhk23_vowel.txt	52	B2	0control	f	spectral	0.98636360791466
bhk23_vowel.txt	53	B2	0control	f	spectral	1.02432415743595
bhk23_vowel.txt	54	B2	0control	f	spectral	0.95416287781405
bhk23_vowel.txt	55	B2	0control	f	spectral	1.01320188288935
bhk23_vowel.txt	56	B2	0control	f	spectral	0.990587509390438
bhk23_vowel.txt	57	B2	0control	f	spectral	0.958382008619833
bhk23_vowel.txt	58	B2	0control	f	spectral	1.01505229264202
bhk23_vowel.txt	59	B2	0control	f	spectral	1.02518427382713
bhk23_vowel.txt	60	B2	0control	f	spectral	1.01426909521698
bhk23_vowel.txt	31	B2	manipulated	f	spectral	1.01182490525819
bhk23_vowel.txt	32	B2	manipulated	f	spectral	1.03821695925449
bhk23_vowel.txt	33	B2	manipulated	f	spectral	1.03855531105626
bhk23_vowel.txt	34	B2	manipulated	f	spectral	NA
bhk23_vowel.txt	35	B2	manipulated	f	spectral	1.0176032814896
bhk23_vowel.txt	36	B2	manipulated	f	spectral	0.997496531213398
bhk23_vowel.txt	37	B2	manipulated	f	spectral	NA
bhk23_vowel.txt	38	B2	manipulated	f	spectral	1.0139026002959
bhk23_vowel.txt	39	B2	manipulated	f	spectral	1.01474373934649
bhk23_vowel.txt	40	B2	manipulated	f	spectral	1.03084860257394
bhk23_vowel.txt	41	B2	manipulated	f	spectral	1.03743352827935
bhk23_vowel.txt	42	B2	manipulated	f	spectral	1.03485663977257
bhk23_vowel.txt	43	B2	manipulated	f	spectral	1.01933597897691
bhk23_vowel.txt	44	B2	manipulated	f	spectral	0.979541640616276
bhk23_vowel.txt	45	B2	manipulated	f	spectral	0.995034576123949
bhk23_vowel.txt	46	B2	manipulated	f	spectral	1.03478569760687
bhk23_vowel.txt	47	B2	manipulated	f	spectral	1.00878894464991
bhk23_vowel.txt	48	B2	manipulated	f	spectral	1.01026440591958
bhk23_vowel.txt	49	B2	manipulated	f	spectral	1.01038703934148
bhk23_vowel.txt	50	B2	manipulated	f	spectral	0.997945605659575
bhk23_vowel.txt	51	B2	manipulated	f	spectral	0.990737438879622
bhk23_vowel.txt	52	B2	manipulated	f	spectral	0.980305627745434
bhk23_vowel.txt	53	B2	manipulated	f	spectral	1.03198033018757
bhk23_vowel.txt	54	B2	manipulated	f	spectral	1.0145090119743
bhk23_vowel.txt	55	B2	manipulated	f	spectral	0.993998909529217
bhk23_vowel.txt	56	B2	manipulated	f	spectral	1.00216746085976
bhk23_vowel.txt	57	B2	manipulated	f	spectral	0.979350513207522
bhk23_vowel.txt	58	B2	manipulated	f	spectral	0.976153653405959
bhk23_vowel.txt	59	B2	manipulated	f	spectral	0.992545070341025
bhk23_vowel.txt	60	B2	manipulated	f	spectral	1.04155232793026
cck14_vowel.txt	31	B2	0control	f	spectral	1.05976850164516
cck14_vowel.txt	32	B2	0control	f	spectral	1.04416804243486
cck14_vowel.txt	33	B2	0control	f	spectral	0.979008074427662
cck14_vowel.txt	34	B2	0control	f	spectral	1.02793948785822
cck14_vowel.txt	35	B2	0control	f	spectral	0.985804895575357
cck14_vowel.txt	36	B2	0control	f	spectral	1.04379142300388
cck14_vowel.txt	37	B2	0control	f	spectral	1.03270854267046
cck14_vowel.txt	38	B2	0control	f	spectral	1.04284162899138
cck14_vowel.txt	39	B2	0control	f	spectral	1.02084983301548
cck14_vowel.txt	40	B2	0control	f	spectral	1.01668649653989
cck14_vowel.txt	41	B2	0control	f	spectral	1.01474766164419
cck14_vowel.txt	42	B2	0control	f	spectral	1.01519501233409
cck14_vowel.txt	43	B2	0control	f	spectral	1.0120501482289
cck14_vowel.txt	44	B2	0control	f	spectral	1.01602650545232
cck14_vowel.txt	45	B2	0control	f	spectral	1.00878476216395
cck14_vowel.txt	46	B2	0control	f	spectral	1.02359754836882
cck14_vowel.txt	47	B2	0control	f	spectral	1.05438418275233
cck14_vowel.txt	48	B2	0control	f	spectral	1.04252840209656
cck14_vowel.txt	49	B2	0control	f	spectral	1.03338348667034
cck14_vowel.txt	50	B2	0control	f	spectral	NA
cck14_vowel.txt	51	B2	0control	f	spectral	1.03584074681316
cck14_vowel.txt	52	B2	0control	f	spectral	0.978944892150051
cck14_vowel.txt	53	B2	0control	f	spectral	1.01016927560374
cck14_vowel.txt	54	B2	0control	f	spectral	0.998992274778076
cck14_vowel.txt	55	B2	0control	f	spectral	0.969486467066246
cck14_vowel.txt	56	B2	0control	f	spectral	1.00209723190514
cck14_vowel.txt	57	B2	0control	f	spectral	0.99788858475574
cck14_vowel.txt	58	B2	0control	f	spectral	0.999127749019217
cck14_vowel.txt	59	B2	0control	f	spectral	1.03972220592235
cck14_vowel.txt	60	B2	0control	f	spectral	1.01501364937616
cck14_vowel.txt	31	B2	manipulated	f	spectral	1.04890818383077
cck14_vowel.txt	32	B2	manipulated	f	spectral	1.00395259558388
cck14_vowel.txt	33	B2	manipulated	f	spectral	0.992697663959298
cck14_vowel.txt	34	B2	manipulated	f	spectral	0.96659967601662
cck14_vowel.txt	35	B2	manipulated	f	spectral	1.01072005855321
cck14_vowel.txt	36	B2	manipulated	f	spectral	NA
cck14_vowel.txt	37	B2	manipulated	f	spectral	0.961050841464635
cck14_vowel.txt	38	B2	manipulated	f	spectral	0.981060868495992
cck14_vowel.txt	39	B2	manipulated	f	spectral	1.03624574058881
cck14_vowel.txt	40	B2	manipulated	f	spectral	1.04926706991621
cck14_vowel.txt	41	B2	manipulated	f	spectral	1.00685148344783
cck14_vowel.txt	42	B2	manipulated	f	spectral	1.02660399993123
cck14_vowel.txt	43	B2	manipulated	f	spectral	1.02970954474349
cck14_vowel.txt	44	B2	manipulated	f	spectral	0.97611580731383
cck14_vowel.txt	45	B2	manipulated	f	spectral	NA
cck14_vowel.txt	46	B2	manipulated	f	spectral	1.01011421863838
cck14_vowel.txt	47	B2	manipulated	f	spectral	1.00055946956332
cck14_vowel.txt	48	B2	manipulated	f	spectral	1.06760589596654
cck14_vowel.txt	49	B2	manipulated	f	spectral	1.02106220003968
cck14_vowel.txt	50	B2	manipulated	f	spectral	1.05181636230234
cck14_vowel.txt	51	B2	manipulated	f	spectral	1.06806743584281
cck14_vowel.txt	52	B2	manipulated	f	spectral	1.04755640325621
cck14_vowel.txt	53	B2	manipulated	f	spectral	0.999605260172019
cck14_vowel.txt	54	B2	manipulated	f	spectral	1.0408327717304
cck14_vowel.txt	55	B2	manipulated	f	spectral	1.05168773837687
cck14_vowel.txt	56	B2	manipulated	f	spectral	1.02618887419601
cck14_vowel.txt	57	B2	manipulated	f	spectral	0.969573288762665
cck14_vowel.txt	58	B2	manipulated	f	spectral	NA
cck14_vowel.txt	59	B2	manipulated	f	spectral	1.00756263899194
cck14_vowel.txt	60	B2	manipulated	f	spectral	1.02493118910138
cza06_vowel.txt	31	B2	0control	f	spectral	0.983280701674582
cza06_vowel.txt	32	B2	0control	f	spectral	NA
cza06_vowel.txt	34	B2	0control	f	spectral	0.976013786225216
cza06_vowel.txt	35	B2	0control	f	spectral	0.979608492810752
cza06_vowel.txt	36	B2	0control	f	spectral	1.00381497713257
cza06_vowel.txt	37	B2	0control	f	spectral	1.01635751825592
cza06_vowel.txt	38	B2	0control	f	spectral	0.970338025364747
cza06_vowel.txt	39	B2	0control	f	spectral	0.982585763832281
cza06_vowel.txt	40	B2	0control	f	spectral	0.99090577856387
cza06_vowel.txt	41	B2	0control	f	spectral	0.990742916108741
cza06_vowel.txt	42	B2	0control	f	spectral	0.954208929301511
cza06_vowel.txt	43	B2	0control	f	spectral	0.992005508346471
cza06_vowel.txt	44	B2	0control	f	spectral	0.967306551977255
cza06_vowel.txt	45	B2	0control	f	spectral	0.972464565878587
cza06_vowel.txt	46	B2	0control	f	spectral	1.00649531685201
cza06_vowel.txt	47	B2	0control	f	spectral	1.02550438627947
cza06_vowel.txt	48	B2	0control	f	spectral	0.991016734901397
cza06_vowel.txt	49	B2	0control	f	spectral	1.00113067992191
cza06_vowel.txt	50	B2	0control	f	spectral	0.977571108366855
cza06_vowel.txt	51	B2	0control	f	spectral	1.03711897377085
cza06_vowel.txt	52	B2	0control	f	spectral	1.00810126601193
cza06_vowel.txt	53	B2	0control	f	spectral	1.01521172096876
cza06_vowel.txt	54	B2	0control	f	spectral	0.997019673235725
cza06_vowel.txt	55	B2	0control	f	spectral	0.976684624525004
cza06_vowel.txt	56	B2	0control	f	spectral	1.01338203190446
cza06_vowel.txt	57	B2	0control	f	spectral	NA
cza06_vowel.txt	58	B2	0control	f	spectral	0.964720699538277
cza06_vowel.txt	59	B2	0control	f	spectral	0.977891637087483
cza06_vowel.txt	60	B2	0control	f	spectral	0.986507508722428
cza06_vowel.txt	31	B2	manipulated	f	spectral	1.05135011347344
cza06_vowel.txt	33	B2	manipulated	f	spectral	1.02561394543612
cza06_vowel.txt	34	B2	manipulated	f	spectral	0.967281821107669
cza06_vowel.txt	35	B2	manipulated	f	spectral	NA
cza06_vowel.txt	36	B2	manipulated	f	spectral	0.959104132577301
cza06_vowel.txt	37	B2	manipulated	f	spectral	0.93211004320261
cza06_vowel.txt	38	B2	manipulated	f	spectral	0.947481053379938
cza06_vowel.txt	39	B2	manipulated	f	spectral	0.937714208784352
cza06_vowel.txt	40	B2	manipulated	f	spectral	0.997962716040753
cza06_vowel.txt	41	B2	manipulated	f	spectral	0.975041804462738
cza06_vowel.txt	42	B2	manipulated	f	spectral	0.971603713229512
cza06_vowel.txt	43	B2	manipulated	f	spectral	1.00382130165075
cza06_vowel.txt	44	B2	manipulated	f	spectral	0.95866116731686
cza06_vowel.txt	45	B2	manipulated	f	spectral	1.0024659664965
cza06_vowel.txt	46	B2	manipulated	f	spectral	0.991997234965979
cza06_vowel.txt	47	B2	manipulated	f	spectral	0.99465462904154
cza06_vowel.txt	48	B2	manipulated	f	spectral	0.990684185701691
cza06_vowel.txt	49	B2	manipulated	f	spectral	1.00319861234858
cza06_vowel.txt	50	B2	manipulated	f	spectral	0.95331450497547
cza06_vowel.txt	51	B2	manipulated	f	spectral	1.00117196053218
cza06_vowel.txt	52	B2	manipulated	f	spectral	0.975884117513544
cza06_vowel.txt	53	B2	manipulated	f	spectral	1.01448785596866
cza06_vowel.txt	54	B2	manipulated	f	spectral	0.999895606800175
cza06_vowel.txt	55	B2	manipulated	f	spectral	1.0202654925575
cza06_vowel.txt	56	B2	manipulated	f	spectral	0.941042270735032
cza06_vowel.txt	57	B2	manipulated	f	spectral	0.985240490510808
cza06_vowel.txt	58	B2	manipulated	f	spectral	1.01773255275734
cza06_vowel.txt	59	B2	manipulated	f	spectral	0.935406771401032
cza06_vowel.txt	60	B2	manipulated	f	spectral	0.992338439217674
dsa20_vowel.txt	31	B2	0control	f	spectral	1.01747333384782
dsa20_vowel.txt	32	B2	0control	f	spectral	1.04069178268301
dsa20_vowel.txt	33	B2	0control	f	spectral	1.02282053591932
dsa20_vowel.txt	34	B2	0control	f	spectral	1.04444535378152
dsa20_vowel.txt	35	B2	0control	f	spectral	0.999031199511546
dsa20_vowel.txt	36	B2	0control	f	spectral	1.03480805414229
dsa20_vowel.txt	37	B2	0control	f	spectral	1.01603035902837
dsa20_vowel.txt	38	B2	0control	f	spectral	NA
dsa20_vowel.txt	39	B2	0control	f	spectral	0.989742118902288
dsa20_vowel.txt	40	B2	0control	f	spectral	1.03108286121623
dsa20_vowel.txt	41	B2	0control	f	spectral	1.01334913833307
dsa20_vowel.txt	42	B2	0control	f	spectral	1.02148199124538
dsa20_vowel.txt	43	B2	0control	f	spectral	1.01646956805774
dsa20_vowel.txt	44	B2	0control	f	spectral	1.01237245602365
dsa20_vowel.txt	45	B2	0control	f	spectral	1.01177279571593
dsa20_vowel.txt	46	B2	0control	f	spectral	1.01656003346039
dsa20_vowel.txt	47	B2	0control	f	spectral	1.02178170998462
dsa20_vowel.txt	48	B2	0control	f	spectral	NA
dsa20_vowel.txt	49	B2	0control	f	spectral	1.02803696143507
dsa20_vowel.txt	50	B2	0control	f	spectral	1.01685803947923
dsa20_vowel.txt	51	B2	0control	f	spectral	0.990439427848856
dsa20_vowel.txt	52	B2	0control	f	spectral	0.993138561722832
dsa20_vowel.txt	53	B2	0control	f	spectral	1.01816939642432
dsa20_vowel.txt	54	B2	0control	f	spectral	1.030241281518
dsa20_vowel.txt	55	B2	0control	f	spectral	1.04326561551345
dsa20_vowel.txt	56	B2	0control	f	spectral	1.00083172822024
dsa20_vowel.txt	57	B2	0control	f	spectral	1.0060464800722
dsa20_vowel.txt	58	B2	0control	f	spectral	1.02929120792719
dsa20_vowel.txt	59	B2	0control	f	spectral	0.99663300505011
dsa20_vowel.txt	60	B2	0control	f	spectral	1.01059258853169
dsa20_vowel.txt	31	B2	manipulated	f	spectral	0.98348309578841
dsa20_vowel.txt	32	B2	manipulated	f	spectral	1.05289980093672
dsa20_vowel.txt	33	B2	manipulated	f	spectral	1.00742385381836
dsa20_vowel.txt	34	B2	manipulated	f	spectral	1.01159683131731
dsa20_vowel.txt	35	B2	manipulated	f	spectral	1.02305850162183
dsa20_vowel.txt	36	B2	manipulated	f	spectral	1.03294383201661
dsa20_vowel.txt	37	B2	manipulated	f	spectral	1.01208642972461
dsa20_vowel.txt	38	B2	manipulated	f	spectral	0.990159637297237
dsa20_vowel.txt	39	B2	manipulated	f	spectral	1.00067488452668
dsa20_vowel.txt	40	B2	manipulated	f	spectral	0.993498337545275
dsa20_vowel.txt	41	B2	manipulated	f	spectral	0.997847104317469
dsa20_vowel.txt	42	B2	manipulated	f	spectral	1.0132905509256
dsa20_vowel.txt	43	B2	manipulated	f	spectral	0.982033020387176
dsa20_vowel.txt	44	B2	manipulated	f	spectral	1.03082917401203
dsa20_vowel.txt	45	B2	manipulated	f	spectral	0.990048392900246
dsa20_vowel.txt	46	B2	manipulated	f	spectral	1.05888143817478
dsa20_vowel.txt	47	B2	manipulated	f	spectral	0.974248896529389
dsa20_vowel.txt	48	B2	manipulated	f	spectral	0.983181770406463
dsa20_vowel.txt	49	B2	manipulated	f	spectral	1.0543080296537
dsa20_vowel.txt	50	B2	manipulated	f	spectral	1.02151247513228
dsa20_vowel.txt	51	B2	manipulated	f	spectral	0.996594476823153
dsa20_vowel.txt	52	B2	manipulated	f	spectral	1.00230839096078
dsa20_vowel.txt	53	B2	manipulated	f	spectral	1.00291388658492
dsa20_vowel.txt	54	B2	manipulated	f	spectral	1.03765950465196
dsa20_vowel.txt	55	B2	manipulated	f	spectral	1.01915801616447
dsa20_vowel.txt	56	B2	manipulated	f	spectral	1.04960744629297
dsa20_vowel.txt	57	B2	manipulated	f	spectral	1.00669472812638
dsa20_vowel.txt	58	B2	manipulated	f	spectral	1.02300812281344
dsa20_vowel.txt	59	B2	manipulated	f	spectral	1.02889445292703
dsa20_vowel.txt	60	B2	manipulated	f	spectral	1.03633330251716
ere28_vowel.txt	31	B2	0control	f	spectral	0.988837111798123
ere28_vowel.txt	32	B2	0control	f	spectral	1.00585853484588
ere28_vowel.txt	33	B2	0control	f	spectral	0.99613401945562
ere28_vowel.txt	34	B2	0control	f	spectral	1.01732087177666
ere28_vowel.txt	35	B2	0control	f	spectral	0.979776078728285
ere28_vowel.txt	36	B2	0control	f	spectral	0.992701864662857
ere28_vowel.txt	37	B2	0control	f	spectral	0.988679946330551
ere28_vowel.txt	38	B2	0control	f	spectral	0.948509503628055
ere28_vowel.txt	39	B2	0control	f	spectral	0.975902789714727
ere28_vowel.txt	40	B2	0control	f	spectral	1.0144660697596
ere28_vowel.txt	41	B2	0control	f	spectral	0.957995727931856
ere28_vowel.txt	42	B2	0control	f	spectral	0.981059381554797
ere28_vowel.txt	43	B2	0control	f	spectral	0.935312159079363
ere28_vowel.txt	44	B2	0control	f	spectral	NA
ere28_vowel.txt	45	B2	0control	f	spectral	0.999520856422392
ere28_vowel.txt	46	B2	0control	f	spectral	0.967335924372842
ere28_vowel.txt	47	B2	0control	f	spectral	0.936067014737918
ere28_vowel.txt	48	B2	0control	f	spectral	0.981495379812209
ere28_vowel.txt	49	B2	0control	f	spectral	0.928756077009087
ere28_vowel.txt	50	B2	0control	f	spectral	0.95443439844432
ere28_vowel.txt	51	B2	0control	f	spectral	0.967092290423487
ere28_vowel.txt	52	B2	0control	f	spectral	0.955089272713116
ere28_vowel.txt	53	B2	0control	f	spectral	0.955950759632867
ere28_vowel.txt	54	B2	0control	f	spectral	0.946229733243254
ere28_vowel.txt	55	B2	0control	f	spectral	0.963731975387257
ere28_vowel.txt	56	B2	0control	f	spectral	0.960682978987998
ere28_vowel.txt	57	B2	0control	f	spectral	0.960052109715338
ere28_vowel.txt	58	B2	0control	f	spectral	0.986042222928591
ere28_vowel.txt	59	B2	0control	f	spectral	0.958875834360912
ere28_vowel.txt	60	B2	0control	f	spectral	0.950341819797537
ere28_vowel.txt	31	B2	manipulated	f	spectral	1.01258466034074
ere28_vowel.txt	32	B2	manipulated	f	spectral	1.00077546826741
ere28_vowel.txt	33	B2	manipulated	f	spectral	0.982574101203069
ere28_vowel.txt	34	B2	manipulated	f	spectral	0.981956157969154
ere28_vowel.txt	35	B2	manipulated	f	spectral	1.02333917446618
ere28_vowel.txt	36	B2	manipulated	f	spectral	1.02750245891649
ere28_vowel.txt	37	B2	manipulated	f	spectral	0.97658824421361
ere28_vowel.txt	38	B2	manipulated	f	spectral	0.994453859960535
ere28_vowel.txt	39	B2	manipulated	f	spectral	0.956766072667596
ere28_vowel.txt	40	B2	manipulated	f	spectral	0.987129937345088
ere28_vowel.txt	41	B2	manipulated	f	spectral	0.977410938082245
ere28_vowel.txt	42	B2	manipulated	f	spectral	1.00953500058974
ere28_vowel.txt	43	B2	manipulated	f	spectral	NA
ere28_vowel.txt	44	B2	manipulated	f	spectral	0.994018326775399
ere28_vowel.txt	45	B2	manipulated	f	spectral	0.999303384932819
ere28_vowel.txt	46	B2	manipulated	f	spectral	0.986424166489237
ere28_vowel.txt	47	B2	manipulated	f	spectral	0.952029401849895
ere28_vowel.txt	48	B2	manipulated	f	spectral	0.974422044526386
ere28_vowel.txt	49	B2	manipulated	f	spectral	0.95471731495888
ere28_vowel.txt	50	B2	manipulated	f	spectral	0.97287437994828
ere28_vowel.txt	51	B2	manipulated	f	spectral	0.938098384759265
ere28_vowel.txt	52	B2	manipulated	f	spectral	0.986430012091431
ere28_vowel.txt	53	B2	manipulated	f	spectral	0.978150179031628
ere28_vowel.txt	54	B2	manipulated	f	spectral	0.997643955797277
ere28_vowel.txt	55	B2	manipulated	f	spectral	0.942323051156862
ere28_vowel.txt	56	B2	manipulated	f	spectral	0.977925341988555
ere28_vowel.txt	57	B2	manipulated	f	spectral	0.986689952537
ere28_vowel.txt	58	B2	manipulated	f	spectral	0.975847871829133
ere28_vowel.txt	59	B2	manipulated	f	spectral	0.972984612485352
ere28_vowel.txt	60	B2	manipulated	f	spectral	1.01519085124852
gsn06_vowel.txt	31	B2	0control	f	spectral	0.974558551618038
gsn06_vowel.txt	32	B2	0control	f	spectral	0.999788506731377
gsn06_vowel.txt	33	B2	0control	f	spectral	1.03734139138408
gsn06_vowel.txt	34	B2	0control	f	spectral	1.04725236146088
gsn06_vowel.txt	35	B2	0control	f	spectral	0.991859613707872
gsn06_vowel.txt	37	B2	0control	f	spectral	0.979535769050469
gsn06_vowel.txt	38	B2	0control	f	spectral	0.997741472002295
gsn06_vowel.txt	39	B2	0control	f	spectral	1.01264482049345
gsn06_vowel.txt	40	B2	0control	f	spectral	1.02742321444185
gsn06_vowel.txt	41	B2	0control	f	spectral	1.04292542985031
gsn06_vowel.txt	42	B2	0control	f	spectral	1.00985375090752
gsn06_vowel.txt	43	B2	0control	f	spectral	1.00173178650892
gsn06_vowel.txt	44	B2	0control	f	spectral	0.965465821061563
gsn06_vowel.txt	45	B2	0control	f	spectral	1.02923738652387
gsn06_vowel.txt	46	B2	0control	f	spectral	1.03196158609383
gsn06_vowel.txt	47	B2	0control	f	spectral	1.00652334095629
gsn06_vowel.txt	48	B2	0control	f	spectral	1.00578896919315
gsn06_vowel.txt	49	B2	0control	f	spectral	1.02273307927542
gsn06_vowel.txt	50	B2	0control	f	spectral	0.984382417154084
gsn06_vowel.txt	51	B2	0control	f	spectral	0.985711118374646
gsn06_vowel.txt	52	B2	0control	f	spectral	NA
gsn06_vowel.txt	53	B2	0control	f	spectral	0.988655885965576
gsn06_vowel.txt	54	B2	0control	f	spectral	1.01588253210675
gsn06_vowel.txt	55	B2	0control	f	spectral	1.00905404599317
gsn06_vowel.txt	56	B2	0control	f	spectral	1.02569489577078
gsn06_vowel.txt	57	B2	0control	f	spectral	1.01917527852682
gsn06_vowel.txt	58	B2	0control	f	spectral	1.02900269584464
gsn06_vowel.txt	59	B2	0control	f	spectral	1.01757056698339
gsn06_vowel.txt	60	B2	0control	f	spectral	1.05563090265423
gsn06_vowel.txt	31	B2	manipulated	f	spectral	1.00975982992464
gsn06_vowel.txt	32	B2	manipulated	f	spectral	NA
gsn06_vowel.txt	33	B2	manipulated	f	spectral	0.983262991187182
gsn06_vowel.txt	34	B2	manipulated	f	spectral	1.00392402712913
gsn06_vowel.txt	35	B2	manipulated	f	spectral	1.03500998807591
gsn06_vowel.txt	36	B2	manipulated	f	spectral	1.00498403460674
gsn06_vowel.txt	37	B2	manipulated	f	spectral	1.03819841220842
gsn06_vowel.txt	38	B2	manipulated	f	spectral	1.00802511225856
gsn06_vowel.txt	39	B2	manipulated	f	spectral	0.994325849112272
gsn06_vowel.txt	40	B2	manipulated	f	spectral	1.03607963776194
gsn06_vowel.txt	41	B2	manipulated	f	spectral	1.01488652064689
gsn06_vowel.txt	42	B2	manipulated	f	spectral	1.01409160287545
gsn06_vowel.txt	43	B2	manipulated	f	spectral	1.00681034248391
gsn06_vowel.txt	44	B2	manipulated	f	spectral	1.04785060499893
gsn06_vowel.txt	45	B2	manipulated	f	spectral	1.06058139658513
gsn06_vowel.txt	46	B2	manipulated	f	spectral	1.00669028717396
gsn06_vowel.txt	47	B2	manipulated	f	spectral	0.992815238429138
gsn06_vowel.txt	48	B2	manipulated	f	spectral	0.997372767208416
gsn06_vowel.txt	49	B2	manipulated	f	spectral	1.0427775647669
gsn06_vowel.txt	50	B2	manipulated	f	spectral	1.0175646539398
gsn06_vowel.txt	51	B2	manipulated	f	spectral	1.0021290104699
gsn06_vowel.txt	52	B2	manipulated	f	spectral	1.06070006011096
gsn06_vowel.txt	53	B2	manipulated	f	spectral	1.03337877281961
gsn06_vowel.txt	54	B2	manipulated	f	spectral	1.01479531357417
gsn06_vowel.txt	55	B2	manipulated	f	spectral	0.995700247901536
gsn06_vowel.txt	56	B2	manipulated	f	spectral	1.05233844117997
gsn06_vowel.txt	57	B2	manipulated	f	spectral	1.03196741334274
gsn06_vowel.txt	58	B2	manipulated	f	spectral	1.04519132242239
gsn06_vowel.txt	59	B2	manipulated	f	spectral	1.04083032713023
gsn06_vowel.txt	60	B2	manipulated	f	spectral	1.03840592840009
jhr19_vowel.txt	31	B2	0control	f	spectral	1.03445099005077
jhr19_vowel.txt	32	B2	0control	f	spectral	1.03597887753922
jhr19_vowel.txt	33	B2	0control	f	spectral	1.05662844774407
jhr19_vowel.txt	34	B2	0control	f	spectral	1.01082782596068
jhr19_vowel.txt	35	B2	0control	f	spectral	1.02848958853704
jhr19_vowel.txt	36	B2	0control	f	spectral	1.00267637405911
jhr19_vowel.txt	37	B2	0control	f	spectral	0.994764224642721
jhr19_vowel.txt	38	B2	0control	f	spectral	1.02967566831594
jhr19_vowel.txt	39	B2	0control	f	spectral	1.00653692615529
jhr19_vowel.txt	40	B2	0control	f	spectral	1.01640562326794
jhr19_vowel.txt	41	B2	0control	f	spectral	1.02186281525971
jhr19_vowel.txt	42	B2	0control	f	spectral	0.990119761464316
jhr19_vowel.txt	43	B2	0control	f	spectral	1.02758876714463
jhr19_vowel.txt	44	B2	0control	f	spectral	0.991114607802269
jhr19_vowel.txt	45	B2	0control	f	spectral	0.996815332275751
jhr19_vowel.txt	46	B2	0control	f	spectral	0.9854567667256
jhr19_vowel.txt	47	B2	0control	f	spectral	1.01160240809027
jhr19_vowel.txt	48	B2	0control	f	spectral	1.04065980072369
jhr19_vowel.txt	49	B2	0control	f	spectral	0.96814206890827
jhr19_vowel.txt	50	B2	0control	f	spectral	NA
jhr19_vowel.txt	51	B2	0control	f	spectral	1.06098621378808
jhr19_vowel.txt	52	B2	0control	f	spectral	1.03310429119847
jhr19_vowel.txt	53	B2	0control	f	spectral	0.978444134210653
jhr19_vowel.txt	54	B2	0control	f	spectral	1.05267503544839
jhr19_vowel.txt	55	B2	0control	f	spectral	1.04605528439568
jhr19_vowel.txt	56	B2	0control	f	spectral	0.996210853464471
jhr19_vowel.txt	57	B2	0control	f	spectral	NA
jhr19_vowel.txt	58	B2	0control	f	spectral	1.01151858692143
jhr19_vowel.txt	59	B2	0control	f	spectral	0.996976488192055
jhr19_vowel.txt	60	B2	0control	f	spectral	1.04155081429941
jhr19_vowel.txt	31	B2	manipulated	f	spectral	1.00061922727816
jhr19_vowel.txt	32	B2	manipulated	f	spectral	0.982007511813283
jhr19_vowel.txt	33	B2	manipulated	f	spectral	1.00953032711657
jhr19_vowel.txt	34	B2	manipulated	f	spectral	0.97970306417521
jhr19_vowel.txt	35	B2	manipulated	f	spectral	0.990067071699366
jhr19_vowel.txt	36	B2	manipulated	f	spectral	0.963479255032833
jhr19_vowel.txt	37	B2	manipulated	f	spectral	NA
jhr19_vowel.txt	38	B2	manipulated	f	spectral	0.976908044968976
jhr19_vowel.txt	39	B2	manipulated	f	spectral	0.933164011653287
jhr19_vowel.txt	40	B2	manipulated	f	spectral	1.0358243434483
jhr19_vowel.txt	41	B2	manipulated	f	spectral	0.993124795873382
jhr19_vowel.txt	42	B2	manipulated	f	spectral	0.957212852348635
jhr19_vowel.txt	43	B2	manipulated	f	spectral	0.997790926644387
jhr19_vowel.txt	44	B2	manipulated	f	spectral	0.971424516585529
jhr19_vowel.txt	45	B2	manipulated	f	spectral	0.989764732066308
jhr19_vowel.txt	46	B2	manipulated	f	spectral	0.965915145438745
jhr19_vowel.txt	47	B2	manipulated	f	spectral	1.00902661016995
jhr19_vowel.txt	49	B2	manipulated	f	spectral	0.990661168944528
jhr19_vowel.txt	50	B2	manipulated	f	spectral	0.989114854240615
jhr19_vowel.txt	51	B2	manipulated	f	spectral	0.993873645256121
jhr19_vowel.txt	52	B2	manipulated	f	spectral	0.974731770181522
jhr19_vowel.txt	53	B2	manipulated	f	spectral	1.00792833178233
jhr19_vowel.txt	54	B2	manipulated	f	spectral	NA
jhr19_vowel.txt	55	B2	manipulated	f	spectral	0.999684848115075
jhr19_vowel.txt	56	B2	manipulated	f	spectral	1.04070312293886
jhr19_vowel.txt	57	B2	manipulated	f	spectral	0.972684306911249
jhr19_vowel.txt	58	B2	manipulated	f	spectral	1.00301461742881
jhr19_vowel.txt	59	B2	manipulated	f	spectral	0.989455295932827
jhr19_vowel.txt	60	B2	manipulated	f	spectral	0.949042439826194
jka21_vowel.txt	31	B2	0control	f	spectral	0.9962035363856
jka21_vowel.txt	32	B2	0control	f	spectral	1.01396781314555
jka21_vowel.txt	33	B2	0control	f	spectral	0.993866175732863
jka21_vowel.txt	34	B2	0control	f	spectral	0.986413668732083
jka21_vowel.txt	35	B2	0control	f	spectral	0.954092708810183
jka21_vowel.txt	36	B2	0control	f	spectral	1.00711646760769
jka21_vowel.txt	37	B2	0control	f	spectral	1.0451640113021
jka21_vowel.txt	38	B2	0control	f	spectral	0.959796249355596
jka21_vowel.txt	39	B2	0control	f	spectral	0.976069694423525
jka21_vowel.txt	40	B2	0control	f	spectral	1.04610019219975
jka21_vowel.txt	41	B2	0control	f	spectral	1.02333545188333
jka21_vowel.txt	42	B2	0control	f	spectral	1.00101401853767
jka21_vowel.txt	43	B2	0control	f	spectral	1.02843376734963
jka21_vowel.txt	44	B2	0control	f	spectral	1.03705581026589
jka21_vowel.txt	45	B2	0control	f	spectral	1.0042209327977
jka21_vowel.txt	46	B2	0control	f	spectral	1.0077339555473
jka21_vowel.txt	47	B2	0control	f	spectral	NA
jka21_vowel.txt	48	B2	0control	f	spectral	0.999427326876664
jka21_vowel.txt	49	B2	0control	f	spectral	1.00693437988982
jka21_vowel.txt	50	B2	0control	f	spectral	1.01719687519014
jka21_vowel.txt	51	B2	0control	f	spectral	1.03684990177597
jka21_vowel.txt	52	B2	0control	f	spectral	1.04873658628085
jka21_vowel.txt	53	B2	0control	f	spectral	0.979542245331487
jka21_vowel.txt	54	B2	0control	f	spectral	1.03894023008122
jka21_vowel.txt	55	B2	0control	f	spectral	1.04456342894091
jka21_vowel.txt	56	B2	0control	f	spectral	1.04208892800437
jka21_vowel.txt	57	B2	0control	f	spectral	1.04677963654446
jka21_vowel.txt	58	B2	0control	f	spectral	1.03775550272983
jka21_vowel.txt	59	B2	0control	f	spectral	1.03751603135706
jka21_vowel.txt	60	B2	0control	f	spectral	1.06597020573452
jka21_vowel.txt	31	B2	manipulated	f	spectral	1.02426283343578
jka21_vowel.txt	32	B2	manipulated	f	spectral	0.96750004254807
jka21_vowel.txt	33	B2	manipulated	f	spectral	0.955844118145045
jka21_vowel.txt	34	B2	manipulated	f	spectral	0.996272502761345
jka21_vowel.txt	35	B2	manipulated	f	spectral	1.03750509036268
jka21_vowel.txt	36	B2	manipulated	f	spectral	0.952482504346897
jka21_vowel.txt	37	B2	manipulated	f	spectral	0.963541659175579
jka21_vowel.txt	38	B2	manipulated	f	spectral	0.953120466672483
jka21_vowel.txt	39	B2	manipulated	f	spectral	1.0462525460549
jka21_vowel.txt	40	B2	manipulated	f	spectral	0.954171501308836
jka21_vowel.txt	41	B2	manipulated	f	spectral	NA
jka21_vowel.txt	42	B2	manipulated	f	spectral	1.0209223759483
jka21_vowel.txt	43	B2	manipulated	f	spectral	0.998831461325414
jka21_vowel.txt	44	B2	manipulated	f	spectral	1.00239714834601
jka21_vowel.txt	45	B2	manipulated	f	spectral	1.03957772926066
jka21_vowel.txt	46	B2	manipulated	f	spectral	1.00534869975115
jka21_vowel.txt	47	B2	manipulated	f	spectral	0.994630735130436
jka21_vowel.txt	48	B2	manipulated	f	spectral	1.01376720424438
jka21_vowel.txt	49	B2	manipulated	f	spectral	0.968964990973654
jka21_vowel.txt	50	B2	manipulated	f	spectral	0.935533168984942
jka21_vowel.txt	51	B2	manipulated	f	spectral	0.994954668465674
jka21_vowel.txt	52	B2	manipulated	f	spectral	0.987743591180767
jka21_vowel.txt	53	B2	manipulated	f	spectral	0.96692731507722
jka21_vowel.txt	54	B2	manipulated	f	spectral	1.03156196822179
jka21_vowel.txt	55	B2	manipulated	f	spectral	0.961016606379223
jka21_vowel.txt	56	B2	manipulated	f	spectral	1.00796950882155
jka21_vowel.txt	57	B2	manipulated	f	spectral	1.05165126539818
jka21_vowel.txt	58	B2	manipulated	f	spectral	1.00871525570795
jka21_vowel.txt	59	B2	manipulated	f	spectral	1.000301165319
jka21_vowel.txt	60	B2	manipulated	f	spectral	1.02962543319159
kba16_vowel.txt	31	B2	0control	f	spectral	0.949586820366012
kba16_vowel.txt	32	B2	0control	f	spectral	0.942070906321951
kba16_vowel.txt	33	B2	0control	f	spectral	0.930555695328191
kba16_vowel.txt	34	B2	0control	f	spectral	NA
kba16_vowel.txt	35	B2	0control	f	spectral	NA
kba16_vowel.txt	36	B2	0control	f	spectral	0.925257252370412
kba16_vowel.txt	37	B2	0control	f	spectral	0.946772504929319
kba16_vowel.txt	38	B2	0control	f	spectral	0.925390631182832
kba16_vowel.txt	39	B2	0control	f	spectral	0.969384126167323
kba16_vowel.txt	40	B2	0control	f	spectral	0.947907541566342
kba16_vowel.txt	41	B2	0control	f	spectral	0.9527306611558
kba16_vowel.txt	42	B2	0control	f	spectral	0.960755318278238
kba16_vowel.txt	43	B2	0control	f	spectral	0.912216507467728
kba16_vowel.txt	44	B2	0control	f	spectral	0.941327070364248
kba16_vowel.txt	45	B2	0control	f	spectral	0.958411375175676
kba16_vowel.txt	46	B2	0control	f	spectral	0.954849323243242
kba16_vowel.txt	47	B2	0control	f	spectral	0.913708917180703
kba16_vowel.txt	48	B2	0control	f	spectral	0.936037096104165
kba16_vowel.txt	49	B2	0control	f	spectral	0.943962477239597
kba16_vowel.txt	50	B2	0control	f	spectral	0.968979321248183
kba16_vowel.txt	51	B2	0control	f	spectral	0.940633396424604
kba16_vowel.txt	52	B2	0control	f	spectral	0.952146849878752
kba16_vowel.txt	53	B2	0control	f	spectral	0.944852126037998
kba16_vowel.txt	54	B2	0control	f	spectral	0.979110084245063
kba16_vowel.txt	55	B2	0control	f	spectral	0.928697648992809
kba16_vowel.txt	56	B2	0control	f	spectral	0.942478706050974
kba16_vowel.txt	57	B2	0control	f	spectral	0.963337888549524
kba16_vowel.txt	58	B2	0control	f	spectral	0.948361873595015
kba16_vowel.txt	59	B2	0control	f	spectral	0.959065975570016
kba16_vowel.txt	60	B2	0control	f	spectral	0.935147389049556
kba16_vowel.txt	31	B2	manipulated	f	spectral	NA
kba16_vowel.txt	32	B2	manipulated	f	spectral	NA
kba16_vowel.txt	33	B2	manipulated	f	spectral	0.959582127005102
kba16_vowel.txt	34	B2	manipulated	f	spectral	0.886679335568724
kba16_vowel.txt	35	B2	manipulated	f	spectral	0.880542308291058
kba16_vowel.txt	36	B2	manipulated	f	spectral	0.887004745660456
kba16_vowel.txt	37	B2	manipulated	f	spectral	0.932678372524329
kba16_vowel.txt	38	B2	manipulated	f	spectral	0.940054370734261
kba16_vowel.txt	39	B2	manipulated	f	spectral	0.951257379133584
kba16_vowel.txt	40	B2	manipulated	f	spectral	0.947403573792323
kba16_vowel.txt	41	B2	manipulated	f	spectral	0.961689326517044
kba16_vowel.txt	42	B2	manipulated	f	spectral	0.939757198674329
kba16_vowel.txt	43	B2	manipulated	f	spectral	0.925040185833759
kba16_vowel.txt	44	B2	manipulated	f	spectral	0.912107067630701
kba16_vowel.txt	45	B2	manipulated	f	spectral	0.918284999612331
kba16_vowel.txt	46	B2	manipulated	f	spectral	0.928697555530424
kba16_vowel.txt	47	B2	manipulated	f	spectral	0.908184534102898
kba16_vowel.txt	48	B2	manipulated	f	spectral	0.883857885674476
kba16_vowel.txt	49	B2	manipulated	f	spectral	0.967575690446718
kba16_vowel.txt	50	B2	manipulated	f	spectral	0.96142756277629
kba16_vowel.txt	51	B2	manipulated	f	spectral	0.92222807848546
kba16_vowel.txt	52	B2	manipulated	f	spectral	0.955976167496797
kba16_vowel.txt	53	B2	manipulated	f	spectral	0.971925963788449
kba16_vowel.txt	54	B2	manipulated	f	spectral	0.926127524548197
kba16_vowel.txt	55	B2	manipulated	f	spectral	0.9359485610359
kba16_vowel.txt	56	B2	manipulated	f	spectral	0.896414636489362
kba16_vowel.txt	57	B2	manipulated	f	spectral	0.919881919176506
kba16_vowel.txt	58	B2	manipulated	f	spectral	0.938782643912412
kba16_vowel.txt	59	B2	manipulated	f	spectral	0.925358743173027
kba16_vowel.txt	60	B2	manipulated	f	spectral	0.916558860600035
khe30_vowel.txt	31	B2	0control	f	spectral	0.966748404297927
khe30_vowel.txt	32	B2	0control	f	spectral	0.98337098812317
khe30_vowel.txt	33	B2	0control	f	spectral	0.98981530935113
khe30_vowel.txt	34	B2	0control	f	spectral	0.978653884961677
khe30_vowel.txt	35	B2	0control	f	spectral	0.957489814594766
khe30_vowel.txt	36	B2	0control	f	spectral	NA
khe30_vowel.txt	37	B2	0control	f	spectral	0.951720412866941
khe30_vowel.txt	38	B2	0control	f	spectral	0.978117569421478
khe30_vowel.txt	39	B2	0control	f	spectral	0.943996526664784
khe30_vowel.txt	40	B2	0control	f	spectral	0.995670335024208
khe30_vowel.txt	41	B2	0control	f	spectral	0.981497010776118
khe30_vowel.txt	42	B2	0control	f	spectral	0.987379665573191
khe30_vowel.txt	43	B2	0control	f	spectral	0.956572195157514
khe30_vowel.txt	44	B2	0control	f	spectral	0.955511312313502
khe30_vowel.txt	45	B2	0control	f	spectral	0.975186699040277
khe30_vowel.txt	46	B2	0control	f	spectral	0.949664319626706
khe30_vowel.txt	47	B2	0control	f	spectral	0.946872136950636
khe30_vowel.txt	48	B2	0control	f	spectral	0.977018143643593
khe30_vowel.txt	49	B2	0control	f	spectral	0.936617278766907
khe30_vowel.txt	50	B2	0control	f	spectral	0.977148471058867
khe30_vowel.txt	52	B2	0control	f	spectral	0.978873915283519
khe30_vowel.txt	53	B2	0control	f	spectral	0.953854849056015
khe30_vowel.txt	54	B2	0control	f	spectral	0.945508778993909
khe30_vowel.txt	55	B2	0control	f	spectral	0.958650877935854
khe30_vowel.txt	56	B2	0control	f	spectral	0.99011024982593
khe30_vowel.txt	57	B2	0control	f	spectral	0.942950714366548
khe30_vowel.txt	58	B2	0control	f	spectral	0.955324410108439
khe30_vowel.txt	59	B2	0control	f	spectral	0.955126373903683
khe30_vowel.txt	60	B2	0control	f	spectral	0.96266572558682
khe30_vowel.txt	31	B2	manipulated	f	spectral	0.990994973735929
khe30_vowel.txt	32	B2	manipulated	f	spectral	0.958875391575001
khe30_vowel.txt	33	B2	manipulated	f	spectral	0.949918809449126
khe30_vowel.txt	34	B2	manipulated	f	spectral	0.954267166867827
khe30_vowel.txt	35	B2	manipulated	f	spectral	0.977185706159567
khe30_vowel.txt	36	B2	manipulated	f	spectral	0.936807499202509
khe30_vowel.txt	37	B2	manipulated	f	spectral	0.991715108026218
khe30_vowel.txt	38	B2	manipulated	f	spectral	0.960890255124265
khe30_vowel.txt	39	B2	manipulated	f	spectral	0.983538566620246
khe30_vowel.txt	40	B2	manipulated	f	spectral	0.96051389592453
khe30_vowel.txt	41	B2	manipulated	f	spectral	0.949718956028613
khe30_vowel.txt	42	B2	manipulated	f	spectral	1.00274327727094
khe30_vowel.txt	43	B2	manipulated	f	spectral	0.972333959859585
khe30_vowel.txt	44	B2	manipulated	f	spectral	0.955400747030462
khe30_vowel.txt	45	B2	manipulated	f	spectral	0.983178588503253
khe30_vowel.txt	46	B2	manipulated	f	spectral	0.9830363878509
khe30_vowel.txt	47	B2	manipulated	f	spectral	0.98207936013705
khe30_vowel.txt	48	B2	manipulated	f	spectral	0.986014864801266
khe30_vowel.txt	49	B2	manipulated	f	spectral	0.949160737533751
khe30_vowel.txt	50	B2	manipulated	f	spectral	0.957930271503273
khe30_vowel.txt	51	B2	manipulated	f	spectral	0.95924825933837
khe30_vowel.txt	52	B2	manipulated	f	spectral	0.947010452570948
khe30_vowel.txt	53	B2	manipulated	f	spectral	NA
khe30_vowel.txt	54	B2	manipulated	f	spectral	0.968151844112695
khe30_vowel.txt	55	B2	manipulated	f	spectral	0.960837821744009
khe30_vowel.txt	56	B2	manipulated	f	spectral	0.953648977390266
khe30_vowel.txt	57	B2	manipulated	f	spectral	0.952264346001479
khe30_vowel.txt	58	B2	manipulated	f	spectral	0.949127138245189
khe30_vowel.txt	59	B2	manipulated	f	spectral	0.958757126406612
khe30_vowel.txt	60	B2	manipulated	f	spectral	0.976572609802372
kws11_vowel.txt	31	B2	0control	f	spectral	1.01408492720788
kws11_vowel.txt	32	B2	0control	f	spectral	0.976314739145299
kws11_vowel.txt	33	B2	0control	f	spectral	0.976151046389601
kws11_vowel.txt	34	B2	0control	f	spectral	1.02630703951393
kws11_vowel.txt	35	B2	0control	f	spectral	0.978793718600769
kws11_vowel.txt	36	B2	0control	f	spectral	1.00496060986819
kws11_vowel.txt	37	B2	0control	f	spectral	0.996378726960929
kws11_vowel.txt	38	B2	0control	f	spectral	0.997667583410091
kws11_vowel.txt	39	B2	0control	f	spectral	0.972961491122661
kws11_vowel.txt	40	B2	0control	f	spectral	0.958139151100136
kws11_vowel.txt	41	B2	0control	f	spectral	0.965313946504588
kws11_vowel.txt	42	B2	0control	f	spectral	0.959217254441871
kws11_vowel.txt	43	B2	0control	f	spectral	0.980125396493062
kws11_vowel.txt	44	B2	0control	f	spectral	NA
kws11_vowel.txt	45	B2	0control	f	spectral	0.986984818393854
kws11_vowel.txt	46	B2	0control	f	spectral	1.00361434804217
kws11_vowel.txt	47	B2	0control	f	spectral	0.976223431478763
kws11_vowel.txt	48	B2	0control	f	spectral	0.982477558362818
kws11_vowel.txt	49	B2	0control	f	spectral	1.03045203665781
kws11_vowel.txt	50	B2	0control	f	spectral	NA
kws11_vowel.txt	51	B2	0control	f	spectral	0.976297774225242
kws11_vowel.txt	52	B2	0control	f	spectral	0.988740996956081
kws11_vowel.txt	53	B2	0control	f	spectral	0.988451625324331
kws11_vowel.txt	54	B2	0control	f	spectral	1.05005891261781
kws11_vowel.txt	55	B2	0control	f	spectral	1.00150290942625
kws11_vowel.txt	56	B2	0control	f	spectral	0.990960521868645
kws11_vowel.txt	57	B2	0control	f	spectral	1.02062070899235
kws11_vowel.txt	58	B2	0control	f	spectral	1.00040420625801
kws11_vowel.txt	59	B2	0control	f	spectral	0.959959801996283
kws11_vowel.txt	60	B2	0control	f	spectral	1.02032193001007
kws11_vowel.txt	31	B2	manipulated	f	spectral	0.996930523297907
[truncated: 3,239 more rows]

## Sheet: Figure 3c
Figure 3c
Input image	Inclusive mask	Exclusive mask	LI (overall)	LI (SD)	LI (min)	LI (max)	LI_T25 (overall)	LI_T25 (SD)	LI_T25 (min)	LI_T25 (max)	LI (wm)	Variance Weighting	Clustering
VowelSpec	ROIsAuditory.nii,1	LI-midline_5_ex	-0.31	0.24	-0.91	-0.054	-0.22	0.094	-0.43	-0.12	-0.44	no	no
FricSpec	ROIsAuditory.nii,1	LI-midline_5_ex	-0.42	0.29	-0.97	-0.098	-0.33	0.15	-0.63	-0.18	-0.59	no	no
VowelSpec	ROIsFrontal.nii,1	LI-midline_5_ex	-0.42	0.23	-0.91	-0.094	-0.35	0.084	-0.57	-0.26	-0.55	no	no
FricSpec	ROIsFrontal.nii,1	LI-midline_5_ex	-0.3	0.12	-0.58	-0.057	-0.29	0.045	-0.36	-0.19	-0.37	no	no
VowelTemp	ROIsAuditory.nii,1	LI-midline_5_ex	-0.062	0.16	-0.26	0.46	-0.11	0.032	-0.17	-0.055	-0.0071	no	no
FricTemp	ROIsAuditory.nii,1	LI-midline_5_ex	0.21	0.091	-0.01	0.44	0.2	0.033	0.15	0.28	0.24	no	no
VowelTemp	ROIsFrontal.nii,1	LI-midline_5_ex	0.69	0.12	0.46	0.92	0.67	0.061	0.59	0.78	0.77	no	no
FricTemp	ROIsFrontal.nii,1	LI-midline_5_ex	0.88	0.045	0.75	0.96	0.87	0.022	0.84	0.91	0.9	no	no

## Sheet: Supplementary Figure 1
Supplementary Figure 1
Hemisphere	G	VP	Region	behav	activity
left	spec	1000000	pSTG	-0.021192	-0.1528825
left	spec	10000000	pSTG	0.000599000000000001	0.146076
left	spec	11000000	pSTG	-0.0119475	0.486655
left	spec	12000000	pSTG	-0.0159335	0.0817685
left	spec	13000000	pSTG	0.0185295	0.1402825
left	spec	14000000	pSTG	-0.0156535	0.4134455
left	spec	15000000	pSTG	0.0085585	-0.0392725
left	spec	16000000	pSTG	0.01086	0.332509
left	spec	17000000	pSTG	-0.0168205	-0.15332
left	spec	18000000	pSTG	0.0170215	0.328779
left	spec	19000000	pSTG	-0.0257085	0.1817545
left	spec	2000000	pSTG	-0.0076275	-0.2982635
left	spec	20000000	pSTG	0.0042105	-0.1101555
left	spec	21000000	pSTG	0.0076115	0.592761
left	spec	22000000	pSTG	-0.0133775	0.4801905
left	spec	3000000	pSTG	-0.0173865	0.8343925
left	spec	4000000	pSTG	0.021384	0.290706
left	spec	5000000	pSTG	0.001866	0.341234
left	spec	6000000	pSTG	-0.0139655	1.0197575
left	spec	7000000	pSTG	0.018919	-0.0124295
left	spec	8000000	pSTG	-0.0037875	-0.170776
left	spec	9000000	pSTG	-0.004581	0.0041215
right	spec	1000000	IFG tri	-0.021192	0.517264
right	spec	1000000	pSTG	-0.021192	-0.096852
right	spec	10000000	IFG tri	0.000599	0.22897
right	spec	10000000	pSTG	0.000599	1.2603425
right	spec	11000000	IFG tri	-0.0119475	2.810661
right	spec	11000000	pSTG	-0.0119475	1.034881
right	spec	12000000	IFG tri	-0.0159335	-0.160494
right	spec	12000000	pSTG	-0.0159335	0.17895
right	spec	13000000	IFG tri	0.0185295	-0.469497
right	spec	13000000	pSTG	0.0185295	-0.0341155
right	spec	14000000	IFG tri	-0.0156535	-0.048913
right	spec	14000000	pSTG	-0.0156535	0.287898
right	spec	15000000	IFG tri	0.0085585	-0.3459915
right	spec	15000000	pSTG	0.0085585	-0.260447
right	spec	16000000	IFG tri	0.01086	0.460835
right	spec	16000000	pSTG	0.01086	0.2498275
right	spec	17000000	IFG tri	-0.0168205	-0.718851
right	spec	17000000	pSTG	-0.0168205	0.265167
right	spec	18000000	IFG tri	0.0170215	0.097457
right	spec	18000000	pSTG	0.0170215	0.9661985
right	spec	19000000	IFG tri	-0.0257085	0.106629
right	spec	19000000	pSTG	-0.0257085	0.4735915
right	spec	2000000	IFG tri	-0.0076275	0.453978
right	spec	2000000	pSTG	-0.0076275	-0.259526
right	spec	20000000	IFG tri	0.0042105	-0.241409
right	spec	20000000	pSTG	0.0042105	-0.116871
right	spec	21000000	IFG tri	0.0076115	1.117745
right	spec	21000000	pSTG	0.0076115	1.0557985
right	spec	22000000	IFG tri	-0.0133775	1.0642075
right	spec	22000000	pSTG	-0.0133775	0.2800495
right	spec	3000000	IFG tri	-0.0173865	0.303445
right	spec	3000000	pSTG	-0.0173865	0.844886
right	spec	4000000	IFG tri	0.021384	0.185525
right	spec	4000000	pSTG	0.021384	0.44337
right	spec	5000000	IFG tri	0.001866	0.1276765
right	spec	5000000	pSTG	0.001866	0.33873
right	spec	6000000	IFG tri	-0.0139655	0.67813
right	spec	6000000	pSTG	-0.0139655	0.3548195
right	spec	7000000	IFG tri	0.018919	0.396092
right	spec	7000000	pSTG	0.018919	-0.202435
right	spec	8000000	IFG tri	-0.0037875	-0.419084
right	spec	8000000	pSTG	-0.0037875	-0.1715595
right	spec	9000000	IFG tri	-0.004581	-0.2891255
right	spec	9000000	pSTG	-0.004581	0.666659
left	temp	23000000	aSTG	-0.0425985	0.9045765
left	temp	23000000	IFG orb	-0.0425985	0.1456905
left	temp	23000000	IFG tri	-0.0425985	0.265705
left	temp	24000000	aSTG	0.0149745	0.0234675
left	temp	24000000	IFG orb	0.0149745	0.4743515
left	temp	24000000	IFG tri	0.0149745	0.0668735
left	temp	25000000	aSTG	-0.0869955	0.872002
left	temp	25000000	IFG orb	-0.0869955	1.700928
left	temp	25000000	IFG tri	-0.0869955	0.85849
left	temp	26000000	aSTG	-0.0065785	0.1920265
left	temp	26000000	IFG orb	-0.0065785	0.0939785
left	temp	26000000	IFG tri	-0.0065785	-0.0949
left	temp	27000000	aSTG	-0.045626	-0.1602695
left	temp	27000000	IFG orb	-0.045626	-0.1663795
left	temp	27000000	IFG tri	-0.045626	0.231081
left	temp	28000000	aSTG	-0.025906	0.420735
left	temp	28000000	IFG orb	-0.025906	-0.1169465
left	temp	28000000	IFG tri	-0.025906	0.6086275
left	temp	29000000	aSTG	-0.02338	0.1431415
left	temp	29000000	IFG orb	-0.02338	1.1066395
left	temp	29000000	IFG tri	-0.02338	0.4197745
left	temp	30000000	aSTG	-0.006236	0.2736035
left	temp	30000000	IFG orb	-0.006236	0.0454995
left	temp	30000000	IFG tri	-0.006236	0.053056
left	temp	31000000	aSTG	-0.002948	-0.295766
left	temp	31000000	IFG orb	-0.002948	0.3545445
left	temp	31000000	IFG tri	-0.002948	-0.034235
left	temp	32000000	aSTG	-0.0115095	0.1224615
left	temp	32000000	IFG orb	-0.0115095	-0.312168
left	temp	32000000	IFG tri	-0.0115095	-0.21716
left	temp	33000000	aSTG	-0.0876145	0.2007195
left	temp	33000000	IFG orb	-0.0876145	0.1065235
left	temp	33000000	IFG tri	-0.0876145	0.169135
left	temp	34000000	aSTG	-0.0295355	-0.1882825
left	temp	34000000	IFG orb	-0.0295355	-0.344651
left	temp	34000000	IFG tri	-0.0295355	0.1391345
left	temp	35000000	aSTG	-0.0020685	-0.264785
left	temp	35000000	IFG orb	-0.0020685	-0.2599195
left	temp	35000000	IFG tri	-0.0020685	0.218894
left	temp	36000000	aSTG	-0.025741	-0.3899935
left	temp	36000000	IFG orb	-0.025741	0.0378735
left	temp	36000000	IFG tri	-0.025741	-0.064153
left	temp	37000000	aSTG	-0.0406285	0.3521955
left	temp	37000000	IFG orb	-0.0406285	0.643839
left	temp	37000000	IFG tri	-0.0406285	-0.091619
left	temp	38000000	aSTG	-0.053034	0.424159
left	temp	38000000	IFG orb	-0.053034	0.468516
left	temp	38000000	IFG tri	-0.053034	-0.0658625
left	temp	39000000	aSTG	-0.070918	0.248215
left	temp	39000000	IFG orb	-0.070918	0.458476
left	temp	39000000	IFG tri	-0.070918	0.2315655
left	temp	40000000	aSTG	-0.089545	0.480693
left	temp	40000000	IFG orb	-0.089545	-0.036547
left	temp	40000000	IFG tri	-0.089545	0.2696485
left	temp	41000000	aSTG	-0.022562	0.028435
left	temp	41000000	IFG orb	-0.022562	-0.0419175
left	temp	41000000	IFG tri	-0.022562	0.2126235
left	temp	42000000	aSTG	-0.0599225	-0.481684
left	temp	42000000	IFG orb	-0.0599225	0.3466515
left	temp	42000000	IFG tri	-0.0599225	0.2025705
left	temp	43000000	aSTG	-0.0260705	-0.468975
left	temp	43000000	IFG orb	-0.0260705	-0.509805
left	temp	43000000	IFG tri	-0.0260705	-0.2152385
left	temp	44000000	aSTG	-0.038873	0.5036035
left	temp	44000000	IFG orb	-0.038873	0.078691
left	temp	44000000	IFG tri	-0.038873	-0.206918
right	temp	23000000	aSTG	-0.0425985	0.1191615
right	temp	24000000	aSTG	0.0149745	0.4351085
right	temp	25000000	aSTG	-0.0869955	0.7639015
right	temp	26000000	aSTG	-0.0065785	0.2482605
right	temp	27000000	aSTG	-0.045626	0.438209
right	temp	28000000	aSTG	-0.025906	0.915354
right	temp	29000000	aSTG	-0.02338	0.06275
right	temp	30000000	aSTG	-0.006236	0.210607
right	temp	31000000	aSTG	-0.002948	0.1524915
right	temp	32000000	aSTG	-0.0115095	-0.1563595
right	temp	33000000	aSTG	-0.0876145	-0.294718
right	temp	34000000	aSTG	-0.0295355	0.2042595
right	temp	35000000	aSTG	-0.0020685	0.048947
right	temp	36000000	aSTG	-0.025741	-0.480947
right	temp	37000000	aSTG	-0.0406285	0.3076495
right	temp	38000000	aSTG	-0.053034	0.183649
right	temp	39000000	aSTG	-0.070918	0.281398
right	temp	40000000	aSTG	-0.089545	0.2721145
right	temp	41000000	aSTG	-0.022562	0.0361225
right	temp	42000000	aSTG	-0.0599225	0.0662185
right	temp	43000000	aSTG	-0.0260705	-0.3598875
right	temp	44000000	aSTG	-0.038873	0.1723065
